# Supplementary material
Source: PubMed Central journal article supplement (PMC4844794)
Supplement: NIHMS765481-supplement-Supp_Table_S1.pdf [file NIHMS765481-supplement-Supp_Table_S1.pdf]

Supplementary Table 1

| gene              | FC    | Pvalue   | FDR      | control RPKM | alcohol RPKM | P drinking | P vs. NP naïve | GWAS | GE in PM | AcbSh | CeA   | DRN   | gene title                                                          | DRN FDR  | same dir | PAG+ ACB | PAG+ CeA |
|-------------------|-------|----------|----------|--------------|--------------|------------|----------------|------|----------|-------|-------|-------|---------------------------------------------------------------------|----------|----------|----------|----------|
| <i>Car8</i>       | 2.19  | 2.44E-19 | 1.06E-16 | 220.0        | 481.8        |            |                |      |          |       |       | 4.06  | carbonic anhydrase 8                                                | 6.46E-73 | Y        |          |          |
| <i>Serpinf2</i>   | -4.24 | 5.55E-19 | 2.32E-16 | 4.3          | 1.0          |            |                |      |          |       |       |       | serpin peptidase inhibitor, clade F (alpha-2 antiplasmin, pigme     | 8.47E-01 | N        |          |          |
| <i>Gdf10</i>      | 2.25  | 6.40E-18 | 2.59E-15 | 18.7         | 42.1         |            |                |      |          |       |       | 3.68  | growth differentiation factor 10                                    | 2.62E-48 | Y        |          |          |
| <i>Dusp1</i>      | 2.24  | 1.46E-17 | 5.71E-15 | 22.2         | 49.7         | 5          | 1              |      |          | 1.88  | 1.57  | 2.04  | dual specificity phosphatase 1                                      | 4.34E-17 | Y        | Y        | Y        |
| <i>Hes3</i>       | 2.55  | 3.89E-17 | 1.47E-14 | 11.8         | 30.1         |            |                |      |          |       |       | 4.16  | hairy and enhancer of split 3 (Drosophila)                          | 1.53E-34 | Y        |          |          |
| <i>Spp1</i>       | -3.25 | 6.00E-17 | 2.20E-14 | 21.5         | 6.6          |            | 1              |      | 1        |       |       | -1.49 | secreted phosphoprotein 1                                           | 1.13E-02 | Y        |          |          |
| <i>Akr1c14</i>    | -3.26 | 7.95E-17 | 2.83E-14 | 5.7          | 1.8          |            |                |      |          |       |       |       | aldo-keto reductase family 1, member C14                            | 2.84E-01 | N        |          |          |
| <i>Cbln3</i>      | 2.06  | 1.81E-16 | 6.27E-14 | 106.2        | 219.0        |            |                |      |          |       |       | 5.22  | cerebellin 3 precursor                                              | 3.51E-90 | Y        |          |          |
| <i>RGD1310507</i> | -4.13 | 3.97E-16 | 1.34E-13 | 5.5          | 1.3          |            |                |      |          |       |       |       |                                                                     | 5.44E-01 | N        |          |          |
| <i>Nr4a2</i>      | 2.11  | 1.48E-15 | 4.85E-13 | 17.6         | 37.1         |            | 1              |      | 1        |       |       | 3.85  | nuclear receptor subfamily 4, group A, member 2                     | 4.77E-50 | Y        |          |          |
| <i>Impg1</i>      | 2.36  | 1.76E-15 | 5.61E-13 | 4.7          | 11.2         |            |                |      |          |       |       | 3.80  | interphotoreceptor matrix proteoglycan 1                            | 8.01E-40 | Y        |          |          |
| <i>Tnnt1</i>      | 2.26  | 2.24E-15 | 6.96E-13 | 20.4         | 46.2         |            | 1              |      |          |       |       | 2.48  | troponin T type 1 (skeletal, slow)                                  | 7.27E-22 | Y        |          |          |
| <i>Neurod2</i>    | 2.32  | 2.40E-15 | 7.27E-13 | 8.2          | 19.0         |            |                |      | 1        |       |       | 4.75  | neuronal differentiation 2                                          | 9.51E-39 | Y        |          |          |
| <i>Slc1a6</i>     | 2.06  | 2.72E-15 | 8.04E-13 | 31.3         | 64.6         |            |                |      | 1        |       |       | 2.79  | solute carrier family 1 (high affinity aspartate/glutamate transpor | 1.83E-33 | Y        |          |          |
| <i>Prkcg</i>      | 1.99  | 5.55E-15 | 1.60E-12 | 58.3         | 115.9        |            | 1              |      |          |       |       | 2.85  | protein kinase C, gamma                                             | 6.58E-41 | Y        |          |          |
| <i>Gabrd</i>      | 1.99  | 1.11E-14 | 3.13E-12 | 59.8         | 119.0        |            | 2              |      |          |       |       | 4.34  | gamma-aminobutyric acid (GABA) A receptor, delta                    | 1.68E-68 | Y        |          |          |
| <i>Sgk1</i>       | -1.97 | 1.95E-14 | 5.37E-12 | 84.8         | 43.1         | 3          | 3              |      |          |       | -1.46 | -1.63 | serum/glucocorticoid regulated kinase 1                             | 7.81E-10 | Y        |          | Y        |
| <i>Dpys</i>       | -8.36 | 3.33E-14 | 8.88E-12 | 1.5          | 0.2          |            |                |      |          |       |       |       | dihydropyrimidinase                                                 | 0.00E+00 | N        |          |          |
| <i>Acan</i>       | -2.36 | 3.37E-14 | 8.88E-12 | 3.6          | 1.5          |            | 1              |      |          |       |       | -1.64 | aggregran                                                           | 1.02E-04 | Y        |          |          |
| <i>Scn4b</i>      | -1.97 | 5.01E-14 | 1.29E-11 | 35.7         | 18.1         |            | 1              |      |          |       |       | 1.90  | sodium channel, voltage-gated, type IV, beta subunit                | 3.34E-13 | N        |          |          |
| <i>Btg2</i>       | 2.32  | 7.44E-14 | 1.88E-11 | 4.8          | 11.1         | 2          | 2              |      |          | 2.07  |       | 1.70  | BTG family, member 2                                                | 2.79E-07 | Y        | Y        |          |
| <i>Asah2</i>      | -2.24 | 8.45E-14 | 2.09E-11 | 13.7         | 6.1          |            |                |      |          |       |       | -1.57 | N-acylsphingosine amidohydrolase (non-lysosomal ceramidase) 2       | 5.05E-05 | Y        |          |          |
| <i>Slc27a5</i>    | -3.58 | 1.06E-13 | 2.54E-11 | 3.2          | 0.9          |            |                |      |          |       |       |       | solute carrier family 27 (fatty acid transporter), member 5         | 7.00E-01 | N        |          |          |
| <i>Ccl9</i>       | -4.72 | 1.07E-13 | 2.54E-11 | 3.9          | 0.8          |            |                |      |          |       |       |       | chemokine (C-C motif) ligand 9                                      | 0.00E+00 | N        |          |          |
| <i>Sepp1</i>      | -1.89 | 1.23E-13 | 2.87E-11 | 377.0        | 199.5        |            |                |      | 4        |       |       |       | selenoprotein P, plasma, 1                                          | 2.61E-01 | N        |          |          |
| <i>Cbln1</i>      | 1.91  | 1.26E-13 | 2.88E-11 | 82.7         | 158.3        |            |                |      |          |       |       | 2.90  | cerebellin 1 precursor                                              | 7.88E-42 | Y        |          |          |
| <i>Rgl3</i>       | 1.96  | 1.32E-13 | 2.96E-11 | 28.3         | 55.3         |            |                |      |          |       |       | 4.19  | ral guanine nucleotide dissociation stimulator-like 3               | 5.28E-59 | Y        |          |          |
| <i>Sbk1</i>       | 1.94  | 1.64E-13 | 3.61E-11 | 21.0         | 40.8         |            |                |      | 1        |       |       | 2.49  | SH3-binding domain kinase 1                                         | 2.88E-29 | Y        |          |          |
| <i>Tle2</i>       | 2.02  | 1.95E-13 | 4.22E-11 | 15.5         | 31.2         |            |                |      |          |       |       | 1.87  | transducin-like enhancer of split 2 (E(sp1) homolog, Drosophila) // | 4.62E-12 | Y        |          |          |
| <i>Igf1</i>       | -2.41 | 2.00E-13 | 4.25E-11 | 10.6         | 4.4          |            | 1              |      |          |       |       | 1.31  | insulin-like growth factor 1 (somatomedin C)                        | 4.97E-02 | N        |          |          |
| <i>Slc17a7</i>    | 1.88  | 3.72E-13 | 7.78E-11 | 165.8        | 311.3        |            |                |      |          |       |       | 5.06  | solute carrier family 17 (sodium-dependent inorganic phosphate c    | 2.46E-91 | Y        |          |          |
| <i>Adcy1</i>      | 1.87  | 4.77E-13 | 9.80E-11 | 185.7        | 346.4        |            |                |      | 1        |       |       | 3.21  | adenylate cyclase 1 (brain)                                         | 1.65E-52 | Y        |          |          |
| <i>Dmgdh</i>      | -5.69 | 7.55E-13 | 1.53E-10 | 1.3          | 0.2          |            |                |      |          |       |       |       | dimethylglycine dehydrogenase                                       | 0.00E+00 | N        |          |          |
| <i>Itpr1</i>      | 1.85  | 8.04E-13 | 1.60E-10 | 142.2        | 263.0        |            | 1              |      |          |       |       | 3.52  | inositol 1,4,5-trisphosphate receptor, type 1                       | 1.05E-61 | Y        |          |          |
| <i>Nefm</i>       | -1.86 | 1.05E-12 | 2.05E-10 | 100.4        | 53.9         |            | 1              |      |          |       |       |       | neurofilament, medium polypeptide                                   | 3.62E-01 | N        |          |          |
| <i>Plp1</i>       | -1.82 | 1.43E-12 | 2.75E-10 | 2382.8       | 1306.7       |            |                |      | 3        |       |       | -1.56 | proteolipid protein 1                                               | 1.04E-08 | Y        |          |          |

Supplementary Table 1

| gene            | FC    | Pvalue   | FDR      | control RPKM | alcohol RPKM | P drinking | P vs. NP naïve | GWAS | GE in PM | AcbSh | CeA | DRN   | gene title                                                         | DRN FDR  | same dir | PAG+ ACB | PAG+ CeA |
|-----------------|-------|----------|----------|--------------|--------------|------------|----------------|------|----------|-------|-----|-------|--------------------------------------------------------------------|----------|----------|----------|----------|
| <i>Fat2</i>     | 1.82  | 2.69E-12 | 5.10E-10 | 99.2         | 180.8        |            |                |      |          |       |     | 4.88  | FAT tumor suppressor homolog 2 (Drosophila)                        | 3.18E-93 | Y        |          |          |
| <i>Cfb</i>      | -2.20 | 3.23E-12 | 6.02E-10 | 10.7         | 4.8          |            | 1              | 1    | 1        |       |     |       | complement factor B                                                | 4.37E-01 | N        |          |          |
| <i>Ndst4</i>    | -2.20 | 3.99E-12 | 7.33E-10 | 9.3          | 4.2          |            |                |      |          |       |     |       | N-deacetylase/N-sulfotransferase (heparan glucosaminyl) 4          | 1.43E-01 | N        |          |          |
| <i>Neurod1</i>  | 1.83  | 4.14E-12 | 7.49E-10 | 139.7        | 255.4        | 1          |                |      |          |       |     | 4.33  | neuronal differentiation 1                                         | 1.63E-75 | Y        |          |          |
| <i>Htr2c</i>    | -1.83 | 4.76E-12 | 8.49E-10 | 79.6         | 43.6         |            |                |      |          |       |     | -1.70 | 5-hydroxytryptamine (serotonin) receptor 2C, G protein-coupled     | 9.23E-12 | Y        |          |          |
| <i>Ywhab</i>    | -1.82 | 6.48E-12 | 1.14E-09 | 126.0        | 69.2         |            |                |      | 1        |       |     | -1.21 | tyrosine 3-monooxygenase/tryptophan 5-monooxygenase activation pro | 3.69E-02 | Y        |          |          |
| <i>Sema3g</i>   | 1.91  | 7.91E-12 | 1.37E-09 | 11.1         | 21.2         |            |                |      |          |       |     | 2.34  | sema domain, immunoglobulin domain (Ig), short basic domain, secr  | 1.30E-20 | Y        |          |          |
| <i>Mrf</i>      | -1.84 | 8.93E-12 | 1.52E-09 | 30.9         | 16.8         |            |                |      |          |       |     | -1.36 |                                                                    | 4.10E-04 | Y        |          |          |
| <i>Slc17a6</i>  | -1.80 | 1.07E-11 | 1.80E-09 | 125.3        | 69.7         |            | 1              |      |          |       |     | -1.82 | solute carrier family 17 (sodium-dependent inorganic phosphate c   | 6.77E-13 | Y        |          |          |
| <i>F5</i>       | -3.88 | 1.11E-11 | 1.84E-09 | 0.8          | 0.2          |            |                |      |          |       |     | 1.81  | coagulation factor V (proaccelerin, labile factor)                 | 4.71E-02 | N        |          |          |
| <i>Tmem195</i>  | -2.85 | 1.26E-11 | 2.06E-09 | 4.2          | 1.5          |            |                |      | 1        |       |     | -1.58 | transmembrane protein 195                                          | 1.20E-03 | Y        |          |          |
| <i>Cbln2</i>    | -1.97 | 1.69E-11 | 2.73E-09 | 20.5         | 10.4         |            | 1              |      |          |       |     | -2.12 | cerebellin 2 precursor                                             | 1.91E-19 | Y        |          |          |
| <i>Kcns1</i>    | -3.98 | 1.90E-11 | 3.03E-09 | 0.0          | 0.0          |            |                |      |          |       |     |       | potassium voltage-gated channel, delayed-rectifier, subfamily S, m | 0.00E+00 | N        |          |          |
| <i>Dlk1</i>     | -1.99 | 1.94E-11 | 3.05E-09 | 30.9         | 15.5         |            |                |      |          |       |     | -1.76 | delta-like 1 homolog (Drosophila)                                  | 3.44E-11 | Y        |          |          |
| <i>Glr1</i>     | -1.88 | 2.42E-11 | 3.76E-09 | 35.2         | 18.7         |            |                |      | 1        |       |     | -1.75 | glycine receptor, alpha 1                                          | 1.05E-11 | Y        |          |          |
| <i>Col23a1</i>  | 2.06  | 2.79E-11 | 4.28E-09 | 5.1          | 10.4         |            |                | 1    |          |       |     | 2.43  | collagen, type XXIII, alpha 1                                      | 2.00E-17 | Y        |          |          |
| <i>F12</i>      | -4.35 | 3.80E-11 | 5.69E-09 | 2.0          | 0.5          |            | 1              |      |          |       |     | -1.96 | coagulation factor XII (Hageman factor)                            | 5.45E-03 | Y        |          |          |
| <i>Slc27a2</i>  | -2.03 | 3.80E-11 | 5.69E-09 | 11.5         | 5.7          |            | 1              |      |          |       |     | -1.42 | solute carrier family 27 (fatty acid transporter), member 2        | 1.12E-03 | Y        |          |          |
| <i>St14</i>     | 2.23  | 6.03E-11 | 8.91E-09 | 2.5          | 5.6          |            |                |      |          |       |     | 2.87  | suppression of tumorigenicity 14 (colon carcinoma)                 | 1.44E-13 | Y        |          |          |
| <i>Slc38a4</i>  | -3.70 | 6.11E-11 | 8.92E-09 | 2.5          | 0.7          |            |                |      | 1        |       |     | -1.71 | solute carrier family 38, member 4                                 | 5.26E-07 | Y        |          |          |
| <i>Kcnh3</i>    | 1.83  | 7.40E-11 | 1.07E-08 | 12.9         | 23.6         | 1          | 1              |      |          |       |     | 4.54  | potassium voltage-gated channel, subfamily H (eag-related), member | 7.23E-58 | Y        |          |          |
| <i>Nr4a3</i>    | 1.82  | 8.95E-11 | 1.28E-08 | 13.0         | 23.6         | 3          | 1              |      | 1        |       |     | 3.01  | nuclear receptor subfamily 4, group A, member 3                    | 7.45E-37 | Y        |          |          |
| <i>Pon3</i>     | -3.62 | 9.26E-11 | 1.31E-08 | 3.4          | 0.9          |            |                |      |          |       |     |       | paraoxonase 3                                                      | 5.75E-02 | N        |          |          |
| <i>Ugt8</i>     | -1.76 | 1.03E-10 | 1.44E-08 | 96.8         | 55.2         | 1          |                |      | 3        |       |     | -1.51 | UDP glycosyltransferase 8                                          | 2.88E-07 | Y        |          |          |
| <i>Scg2</i>     | -1.75 | 1.16E-10 | 1.60E-08 | 153.4        | 87.6         | 1          |                |      | 1        |       |     | -1.84 | secretogranin II                                                   | 1.32E-15 | Y        |          |          |
| <i>Cdc42bpg</i> | 1.90  | 1.19E-10 | 1.62E-08 | 4.2          | 7.9          |            |                |      |          |       |     | 2.40  | CDC42 binding protein kinase gamma (DMPK-like)                     | 4.71E-20 | Y        |          |          |
| <i>Junb</i>     | 2.28  | 1.30E-10 | 1.75E-08 | 3.7          | 8.5          | 1          | 1              |      | 1        |       |     | 1.78  | jun B proto-oncogene                                               | 3.36E-06 | Y        |          |          |
| <i>Elavl2</i>   | -1.77 | 1.57E-10 | 2.09E-08 | 44.4         | 25.1         | 1          | 1              |      |          |       |     | -1.81 | ELAV (embryonic lethal, abnormal vision, Drosophila)-like          | 1.26E-14 | Y        |          |          |
| <i>Itga7</i>    | 1.77  | 1.74E-10 | 2.29E-08 | 27.9         | 49.3         |            |                |      |          |       |     | 2.59  | integrin, alpha 7                                                  | 3.56E-31 | Y        |          |          |
| <i>Plac9</i>    | 2.86  | 1.99E-10 | 2.59E-08 | 6.1          | 17.4         |            |                |      |          |       |     | 3.26  | placenta-specific 9                                                | 5.71E-14 | Y        |          |          |
| <i>Uncx</i>     | 2.10  | 2.10E-10 | 2.71E-08 | 4.0          | 8.3          |            |                |      |          |       |     | 3.21  | UNC homeobox                                                       | 1.40E-20 | Y        |          |          |
| <i>Col27a1</i>  | 1.81  | 2.32E-10 | 2.96E-08 | 8.2          | 14.8         |            |                |      | 1        |       |     | 2.36  | collagen, type XXVII, alpha 1                                      | 2.34E-21 | Y        |          |          |
| <i>Rgs8</i>     | 1.73  | 2.60E-10 | 3.28E-08 | 100.9        | 174.3        | 1          |                |      |          |       |     | 2.48  | regulator of G-protein signaling 8                                 | 1.24E-32 | Y        |          |          |
| <i>Barhl2</i>   | 1.94  | 3.20E-10 | 4.00E-08 | 10.9         | 21.1         |            |                |      | 1        |       |     | 4.06  | BarH-like homeobox 2                                               | 1.93E-30 | Y        |          |          |
| <i>Pde5a</i>    | 1.75  | 3.26E-10 | 4.03E-08 | 32.1         | 56.2         |            |                |      |          |       |     | 3.22  | phosphodiesterase 5A, cGMP-specific                                | 4.00E-47 | Y        |          |          |
| <i>Tmem212</i>  | 1.89  | 3.29E-10 | 4.03E-08 | 17.1         | 32.3         |            |                |      |          |       |     | 2.48  | transmembrane protein 212                                          | 1.74E-23 | Y        |          |          |

Supplementary Table 1

| gene              | FC    | Pvalue   | FDR      | control RPKM | alcohol RPKM | P drinking | P vs. NP naïve | GWAS | GE in PM | AcbSh | CeA   | DRN   | gene title                                                           | DRN FDR  | same dir | PAG+ ACB | PAG+ CeA |
|-------------------|-------|----------|----------|--------------|--------------|------------|----------------|------|----------|-------|-------|-------|----------------------------------------------------------------------|----------|----------|----------|----------|
| <i>Il16</i>       | 1.73  | 3.72E-10 | 4.51E-08 | 46.5         | 80.3         | 1          |                |      |          |       |       | 4.02  | interleukin 16                                                       | 4.70E-68 | Y        |          |          |
| <i>Nos1</i>       | 1.75  | 4.80E-10 | 5.76E-08 | 25.0         | 43.9         |            |                |      |          |       |       |       | nitric oxide synthase 1 (neuronal)                                   | 7.10E-02 | N        |          |          |
| <i>Selm</i>       | 1.75  | 5.39E-10 | 6.41E-08 | 132.4        | 231.3        |            | 1              |      | 1        |       |       | 1.67  | selenoprotein M                                                      | 4.75E-10 | Y        |          |          |
| <i>Ccdc153</i>    | 1.82  | 5.63E-10 | 6.57E-08 | 24.4         | 44.5         |            | 1              |      |          |       |       | 2.18  | coiled-coil domain containing 153                                    | 8.11E-20 | Y        |          |          |
| <i>Gas7</i>       | 1.70  | 5.64E-10 | 6.57E-08 | 86.4         | 147.3        |            |                |      | 1        |       |       | 3.25  | growth arrest-specific 7                                             | 4.95E-53 | Y        |          |          |
| <i>Mrgprf</i>     | 1.84  | 5.85E-10 | 6.75E-08 | 12.7         | 23.4         |            |                |      |          |       |       | 4.72  | MAS-related GPR, member F                                            | 2.24E-48 | Y        |          |          |
| <i>Kctd4</i>      | -2.01 | 6.56E-10 | 7.50E-08 | 7.8          | 3.9          |            | 1              |      |          |       |       | -1.61 | potassium channel tetramerisation domain containing 4                | 1.03E-05 | Y        |          |          |
| <i>Jup</i>        | 1.74  | 7.23E-10 | 8.19E-08 | 26.2         | 45.6         |            |                |      |          |       |       | 1.96  | junction plakoglobin                                                 | 1.94E-16 | Y        |          |          |
| <i>Eps8l2</i>     | 1.94  | 7.68E-10 | 8.62E-08 | 4.7          | 9.1          |            | 1              |      | 1        |       |       | 2.96  | EPS8-like 2                                                          | 2.25E-24 | Y        |          |          |
| <i>Tspan2</i>     | -1.70 | 7.75E-10 | 8.62E-08 | 108.3        | 63.6         | 1          | 1              |      |          |       |       | -1.53 | tetraspanin 2                                                        | 8.95E-08 | Y        |          |          |
| <i>Papss2</i>     | -1.92 | 8.80E-10 | 9.70E-08 | 9.0          | 4.7          |            |                |      |          |       |       | -1.36 | 3'-phosphoadenosine 5'-phosphosulfate synthase 2                     | 7.18E-03 | Y        |          |          |
| <i>Hhip</i>       | -1.86 | 9.11E-10 | 9.95E-08 | 16.8         | 9.0          | 1          | 2              |      |          |       |       | -1.52 | hedgehog interacting protein                                         | 1.21E-05 | Y        |          |          |
| <i>Scd1</i>       | -1.82 | 9.21E-10 | 9.97E-08 | 13.1         | 7.2          | 1          |                |      |          |       |       |       | stearoyl-CoA desaturase (delta-9-desaturase) (rat/rodent, human SCD) | 1.73E-01 | N        |          |          |
| <i>Zic2</i>       | 1.73  | 9.31E-10 | 9.99E-08 | 31.5         | 54.5         |            | 1              |      |          |       |       | 3.80  | Zic family member 2                                                  | 1.89E-56 | Y        |          |          |
| <i>Ugt1a1</i>     | -2.34 | 1.02E-09 | 1.08E-07 | 4.9          | 2.1          |            |                |      |          |       |       |       |                                                                      | 4.89E-01 | N        |          |          |
| <i>Btbd4</i>      | 1.78  | 1.02E-09 | 1.08E-07 | 14.0         | 24.9         |            |                |      |          |       |       | 2.24  | BTB (POZ) domain containing 4                                        | 2.32E-19 | Y        |          |          |
| <i>Trim36</i>     | -1.94 | 1.03E-09 | 1.08E-07 | 12.7         | 6.5          |            |                |      |          |       |       | -1.69 | tripartite motif containing 36                                       | 3.26E-08 | Y        |          |          |
| <i>Sdc1</i>       | 1.78  | 1.10E-09 | 1.14E-07 | 13.2         | 23.6         | 1          |                |      |          |       |       | 5.13  | syndecan 1                                                           | 2.36E-62 | Y        |          |          |
| <i>Fam107a</i>    | 1.71  | 1.11E-09 | 1.14E-07 | 54.1         | 92.5         |            |                |      | 2        |       |       | 2.86  | family with sequence similarity 107, member A                        | 1.56E-39 | Y        |          |          |
| <i>Pcp4l1</i>     | -1.92 | 1.14E-09 | 1.16E-07 | 20.4         | 10.6         |            | 1              |      |          |       |       | -1.63 | Purkinje cell protein 4 like 1                                       | 4.17E-06 | Y        |          |          |
| <i>Cyr61</i>      | 3.18  | 1.15E-09 | 1.16E-07 | 0.8          | 2.7          | 2          |                |      |          | 3.83  | 1.56  | 3.60  | cysteine-rich, angiogenic inducer, 61                                | 3.60E-14 | Y        | Y        | Y        |
| <i>RGD1309873</i> | -1.79 | 1.16E-09 | 1.16E-07 | 53.6         | 30.1         |            |                |      |          |       |       | -1.69 | myelin-associated oligodendrocyte basic protein                      | 1.13E-09 | Y        |          |          |
| <i>Mobp</i>       | -1.68 | 1.35E-09 | 1.34E-07 | 216.3        | 128.6        | 1          | 1              |      | 2        |       |       | -1.54 | solute carrier organic anion transporter family, member 2A1          | 3.64E-08 | Y        |          |          |
| <i>Slco2a1</i>    | -3.34 | 1.47E-09 | 1.45E-07 | 1.7          | 0.5          |            |                |      | 1        |       |       | -1.61 | inositol polyphosphate-5-phosphatase, 40kDa                          | 3.84E-02 | Y        |          |          |
| <i>Inpp5a</i>     | 1.71  | 1.48E-09 | 1.45E-07 | 48.5         | 82.8         |            |                |      |          |       |       | 2.01  | tight junction protein 3 (zona occludens 3)                          | 9.75E-19 | Y        |          |          |
| <i>Tjp3</i>       | 2.07  | 1.82E-09 | 1.76E-07 | 2.8          | 5.9          |            |                |      |          |       |       | 2.41  | TIMP metalloproteinase inhibitor 4                                   | 2.66E-15 | Y        |          |          |
| <i>Timp4</i>      | 1.73  | 1.83E-09 | 1.76E-07 | 43.8         | 75.6         |            | 1              |      | 1        |       |       | 1.86  | KIT ligand                                                           | 6.70E-14 | Y        |          |          |
| <i>Hrmbp3</i>     | 1.73  | 1.91E-09 | 1.82E-07 | 63.9         | 110.6        |            | 1              |      |          |       |       | 2.15  | polo-like kinase 5                                                   | 2.69E-19 | Y        |          |          |
| <i>RGD1305592</i> | 1.72  | 1.98E-09 | 1.88E-07 | 47.6         | 82.0         |            |                |      |          |       |       | 1.90  | Rho GTPase activating protein 10                                     | 5.55E-14 | Y        |          |          |
| <i>Kitlg</i>      | 1.72  | 2.04E-09 | 1.92E-07 | 15.1         | 26.0         |            | 1              |      |          |       |       | 2.13  | vimentin                                                             | 8.00E-21 | Y        |          |          |
| <i>Plk5</i>       | 1.76  | 2.06E-09 | 1.92E-07 | 20.6         | 36.2         |            | 1              |      |          |       |       | 4.59  | WD repeat domain 63                                                  | 2.21E-52 | Y        |          |          |
| <i>Arhgap10</i>   | 1.77  | 2.16E-09 | 1.99E-07 | 13.8         | 24.6         |            |                |      |          |       |       | 2.86  | cytochrome P450, family 4, subfamily f, polypeptide 1                | 1.67E-30 | Y        |          |          |
| <i>Vim</i>        | 1.70  | 2.17E-09 | 1.99E-07 | 82.3         | 139.6        | 1          |                |      | 1        |       | -1.59 | 2.03  | transient receptor potential cation channel, subfamily C, member 3   | 1.27E-19 | Y        |          | N        |
| <i>Wdr63</i>      | 1.82  | 2.22E-09 | 2.02E-07 | 9.4          | 17.1         |            |                |      |          |       |       | 1.96  | phosphatidylinositol-4-phosphate 5-kinase, type I, beta              | 8.72E-15 | Y        |          |          |
| <i>Grid2ip</i>    | 1.85  | 2.26E-09 | 2.04E-07 | 6.2          | 11.4         |            |                |      |          |       |       | 3.49  | calcium binding protein 7                                            | 6.93E-34 | Y        |          |          |
| <i>Cyp4f1</i>     | -2.27 | 2.31E-09 | 2.07E-07 | 5.6          | 2.5          |            |                |      |          |       |       |       |                                                                      | 3.36E-01 | N        |          |          |
| <i>Trpc3</i>      | 1.71  | 2.33E-09 | 2.07E-07 | 25.2         | 43.2         |            |                | 1    |          |       |       | 2.13  | cytochrome P450, family 4, subfamily f, polypeptide 1                | 7.13E-21 | Y        |          |          |
| <i>Pip5k1b</i>    | 1.72  | 2.34E-09 | 2.07E-07 | 24.6         | 42.3         |            | 1              |      |          |       |       | 1.83  | transient receptor potential cation channel, subfamily C, member 3   | 6.18E-13 | Y        |          |          |
| <i>Cabp7</i>      | -1.85 | 2.71E-09 | 2.38E-07 | 12.9         | 7.0          |            |                |      |          |       |       |       |                                                                      | 3.31E-01 | N        |          |          |
| <i>Gsbs</i>       | 1.70  | 2.76E-09 | 2.41E-07 | 67.3         | 114.0        |            |                |      |          |       |       | 3.57  | calcium binding protein 7                                            | 4.24E-56 | Y        |          |          |

Supplementary Table 1

| gene            | FC     | Pvalue   | FDR      | control RPKM | alcohol RPKM | P drinking | P vs. NP naïve | GWAS | GE in PM | AcbSh | CeA  | DRN   | gene title                                                                | DRN FDR  | same dir | PAG+ ACB | PAG+ CeA |
|-----------------|--------|----------|----------|--------------|--------------|------------|----------------|------|----------|-------|------|-------|---------------------------------------------------------------------------|----------|----------|----------|----------|
| <i>Reln</i>     | 1.67   | 2.83E-09 | 2.45E-07 | 65.2         | 108.6        | 1          | 1              |      |          |       |      | 2.96  | reelin                                                                    | 4.71E-46 | Y        |          |          |
| <i>Diras2</i>   | 1.69   | 2.85E-09 | 2.45E-07 | 110.2        | 186.5        |            |                |      |          |       |      | 2.31  | DIRAS family, GTP-binding RAS-like 2                                      | 1.66E-25 | Y        |          |          |
| <i>Npy5r</i>    | -2.45  | 3.21E-09 | 2.74E-07 | 3.6          | 1.5          | 2          | 2              |      |          | 1.23  | 1.36 | -1.61 | neuropeptide Y receptor Y5                                                | 7.37E-04 | Y        | N        | N        |
| <i>Kcnj12</i>   | 1.72   | 3.37E-09 | 2.86E-07 | 27.3         | 47.0         |            |                |      |          |       |      | 2.64  | potassium inwardly-rectifying channel, subfamily J, member 12             | 1.84E-29 | Y        |          |          |
| <i>Shroom2</i>  | -1.68  | 3.46E-09 | 2.91E-07 | 31.5         | 18.7         |            |                |      |          |       |      | -1.57 | shroom family member 2                                                    | 1.48E-08 | Y        |          |          |
| <i>lyd</i>      | -11.07 | 3.63E-09 | 3.03E-07 | 1.2          | 0.1          |            |                |      |          |       |      |       | iodotyrosine deiodinase                                                   | 0.00E+00 | N        |          |          |
| <i>Neto1</i>    | -1.91  | 3.68E-09 | 3.06E-07 | 7.7          | 4.0          |            | 1              |      |          |       |      |       | neuropilin (NRP) and tolloid (TLL)-like 1                                 | 7.50E-01 | N        |          |          |
| <i>Lgi2</i>     | -1.73  | 4.26E-09 | 3.51E-07 | 50.0         | 29.0         |            |                |      |          |       |      | -1.24 | leucine-rich repeat LGI family, member 2                                  | 2.22E-02 | Y        |          |          |
| <i>Fgf1</i>     | -2.03  | 4.44E-09 | 3.64E-07 | 14.8         | 7.3          |            | 1              |      | 2        |       |      |       | fibroblast growth factor 1 (acidic)                                       | 9.51E-01 | N        |          |          |
| <i>Odf3b</i>    | 2.12   | 4.54E-09 | 3.69E-07 | 6.9          | 14.7         |            |                |      |          |       |      | 2.70  | outer dense fiber of sperm tails 3B                                       | 7.87E-16 | Y        |          |          |
| <i>Grid2</i>    | 1.66   | 5.06E-09 | 4.09E-07 | 63.4         | 105.3        |            |                |      |          |       |      | 2.31  | glutamate receptor, ionotropic, delta 2                                   | 1.53E-27 | Y        |          |          |
| <i>Tcf7l2</i>   | -1.68  | 5.42E-09 | 4.35E-07 | 51.2         | 30.5         |            |                |      | 2        |       |      |       | transcription factor 7-like 2 (T-cell specific, HMG-box) /                | 4.88E-01 | N        |          |          |
| <i>Cited4</i>   | 2.18   | 6.56E-09 | 5.23E-07 | 6.0          | 13.1         |            |                |      |          |       |      | 4.05  | Cbp/p300-interacting transactivator, with Glu/Asp-rich carboxy-te         | 2.75E-20 | Y        |          |          |
| <i>Chn2</i>     | 1.67   | 7.31E-09 | 5.79E-07 | 109.5        | 183.0        |            |                | 1    | 1        |       |      | 1.98  | chimerin (chimaerin) 2                                                    | 4.67E-17 | Y        |          |          |
| <i>Fndc7</i>    | 1.84   | 7.42E-09 | 5.84E-07 | 4.9          | 9.0          |            |                |      |          |       |      | 2.40  | fibronectin type III domain containing 7                                  | 1.95E-17 | Y        |          |          |
| <i>Hpcal1</i>   | 1.65   | 7.50E-09 | 5.87E-07 | 173.3        | 286.1        |            |                |      | 1        |       |      | 1.48  | hippocalcin-like 1                                                        | 1.34E-06 | Y        |          |          |
| <i>Mbp</i>      | -1.63  | 7.95E-09 | 6.18E-07 | 1805.2       | 1107.2       |            |                |      | 1        |       |      | -1.45 | myelin basic protein                                                      | 2.78E-06 | Y        |          |          |
| <i>Entpd3</i>   | -1.87  | 8.10E-09 | 6.25E-07 | 9.2          | 4.9          |            | 1              |      |          |       |      |       | ectonucleoside triphosphate diphosphohydrolase 3                          | 9.09E-02 | N        |          |          |
| <i>Atp1a1</i>   | 1.64   | 9.73E-09 | 7.47E-07 | 276.5        | 452.3        |            |                |      |          |       |      | 2.10  | ATPase, Na <sup>+</sup> /K <sup>+</sup> transporting, alpha 1 polypeptide | 1.86E-22 | Y        |          |          |
| <i>Nefh</i>     | -1.63  | 1.13E-08 | 8.62E-07 | 144.8        | 88.6         |            | 2              |      | 3        |       |      |       | neurofilament, heavy polypeptide                                          | 8.39E-01 | N        |          |          |
| <i>Vtn</i>      | -1.76  | 1.14E-08 | 8.64E-07 | 32.8         | 18.6         |            |                |      |          |       |      |       | vitronectin                                                               | 4.92E-01 | N        |          |          |
| <i>Fam107b</i>  | 1.68   | 1.15E-08 | 8.66E-07 | 25.5         | 42.7         |            | 1              |      | 1        |       |      | 2.22  | family with sequence similarity 107, member B                             | 4.00E-22 | Y        |          |          |
| <i>Chrna7</i>   | -1.88  | 1.19E-08 | 8.91E-07 | 17.3         | 9.2          | 2          |                | 1    |          |       |      | -1.37 | cholinergic receptor, nicotinic, alpha 7 (neuronal)                       | 4.01E-04 | Y        |          |          |
| <i>Opalin</i>   | -1.68  | 1.21E-08 | 9.00E-07 | 44.8         | 26.7         |            |                |      |          |       |      | -1.62 | oligodendrocytic myelin paranodal and inner loop protein /                | 6.58E-09 | Y        |          |          |
| <i>Slitrk6</i>  | -1.82  | 1.26E-08 | 9.31E-07 | 7.5          | 4.1          |            |                |      |          |       |      | -1.52 | SLIT and NTRK-like family, member 6                                       | 4.22E-05 | Y        |          |          |
| <i>Grin2c</i>   | 1.65   | 1.30E-08 | 9.55E-07 | 37.7         | 62.1         |            |                | 1    |          |       |      | 2.61  | glutamate receptor, ionotropic, N-methyl D-aspartate 2C                   | 5.29E-33 | Y        |          |          |
| <i>Gprc5c</i>   | 1.75   | 1.32E-08 | 9.64E-07 | 15.2         | 26.7         |            |                |      |          |       |      | 3.38  | G protein-coupled receptor, family C, group 5, member C                   | 4.97E-32 | Y        |          |          |
| <i>Ak7</i>      | 1.70   | 1.43E-08 | 1.04E-06 | 17.5         | 29.8         |            |                |      |          |       |      | 2.09  | adenylate kinase 7                                                        | 8.37E-19 | Y        |          |          |
| <i>Sec14l4</i>  | -3.98  | 1.49E-08 | 1.08E-06 | 1.0          | 0.3          |            |                |      | 1        |       |      |       | SEC14-like 4 ( <i>S. cerevisiae</i> )                                     | 0.00E+00 | N        |          |          |
| <i>Kit</i>      | 1.65   | 1.54E-08 | 1.10E-06 | 32.8         | 54.1         |            |                |      |          |       |      |       | v-kit Hardy-Zuckerman 4 feline sarcoma viral oncogene homolog             | 1.37E-01 | N        |          |          |
| <i>Nab2</i>     | 1.75   | 1.55E-08 | 1.11E-06 | 8.0          | 13.9         |            | 1              |      |          |       |      | 2.57  | NGFI-A binding protein 2 (EGR1 binding protein 2)                         | 2.07E-20 | Y        |          |          |
| <i>Adprh1</i>   | 1.93   | 1.59E-08 | 1.13E-06 | 6.5          | 12.6         |            |                |      |          |       |      | 3.63  | ADP-ribosylhydrolase like 1                                               | 4.61E-25 | Y        |          |          |
| <i>Oprm1</i>    | -1.83  | 1.62E-08 | 1.14E-06 | 9.7          | 5.3          |            |                |      |          |       |      | -1.64 |                                                                           | 1.44E-07 | Y        |          |          |
| <i>Ftcd</i>     | -4.88  | 1.76E-08 | 1.23E-06 | 0.0          | 0.0          |            | 1              |      |          |       |      |       | formiminotransferase cyclodeaminase                                       | 0.00E+00 | N        |          |          |
| <i>Itpka</i>    | 1.73   | 1.97E-08 | 1.37E-06 | 20.3         | 35.0         | 1          | 1              |      | 1        |       |      | 2.15  | inositol-trisphosphate 3-kinase A                                         | 2.24E-17 | Y        |          |          |
| <i>Ankrd34c</i> | -1.94  | 2.02E-08 | 1.40E-06 | 7.4          | 3.8          |            |                |      |          |       |      | -1.57 | ankyrin repeat domain 34C                                                 | 1.91E-03 | Y        |          |          |
| <i>Npy1r</i>    | -2.00  | 2.10E-08 | 1.43E-06 | 6.1          | 3.1          |            | 2              |      |          |       |      | -1.57 | neuropeptide Y receptor Y1                                                | 2.96E-05 | Y        |          |          |

Supplementary Table 1

| gene              | FC    | Pvalue   | FDR      | control RPKM | alcohol RPKM | P drinking | P vs. NP naïve | GWAS | GE in PM | AcbSh | CeA | DRN   | gene title                                                       | DRN FDR  | same dir | PAG+ ACB | PAG+ CeA |
|-------------------|-------|----------|----------|--------------|--------------|------------|----------------|------|----------|-------|-----|-------|------------------------------------------------------------------|----------|----------|----------|----------|
| <i>Bhlhe22</i>    | 1.75  | 2.10E-08 | 1.43E-06 | 8.9          | 15.5         |            |                |      |          |       |     | 1.82  | basic helix-loop-helix family, member e22                        | 4.26E-11 | Y        |          |          |
| <i>Prkcd</i>      | 1.72  | 2.10E-08 | 1.43E-06 | 12.6         | 21.6         | 1          |                |      | 1        |       |     | 2.40  | protein kinase C, delta                                          | 1.17E-22 | Y        |          |          |
| <i>Tmem88b</i>    | -1.78 | 2.12E-08 | 1.44E-06 | 19.8         | 11.1         |            |                |      |          |       |     | -1.54 | transmembrane protein 88b                                        | 1.26E-05 | Y        |          |          |
| <i>Gabra6</i>     | 1.62  | 2.18E-08 | 1.47E-06 | 322.9        | 523.0        |            |                |      |          |       |     | 4.53  | gamma-aminobutyric acid (GABA) A receptor, alpha 6               | 2.13E-82 | Y        |          |          |
| <i>Zmynd10</i>    | 1.71  | 2.19E-08 | 1.47E-06 | 22.2         | 37.9         |            |                |      |          |       |     | 1.93  | zinc finger, MYND-type containing 10                             | 3.68E-14 | Y        |          |          |
| <i>Rgn</i>        | -2.99 | 2.35E-08 | 1.57E-06 | 2.9          | 1.0          | 1          |                |      |          |       |     |       | regucalcin (senescence marker protein-30)                        | 4.41E-01 | N        |          |          |
| <i>Jph1</i>       | 1.74  | 2.49E-08 | 1.65E-06 | 10.6         | 18.4         |            |                |      |          |       |     | 3.10  | junctophilin 1                                                   | 4.47E-29 | Y        |          |          |
| <i>RGD1562658</i> | 1.96  | 2.62E-08 | 1.72E-06 | 7.9          | 15.5         |            |                |      |          |       |     | 2.43  |                                                                  | 2.36E-15 | Y        |          |          |
| <i>Tll1</i>       | 1.71  | 2.64E-08 | 1.72E-06 | 7.4          | 12.6         |            |                |      |          |       |     | 3.11  | tolloid-like 1                                                   | 1.03E-32 | Y        |          |          |
| <i>Ernm</i>       | -1.66 | 2.64E-08 | 1.72E-06 | 62.5         | 37.6         |            | 2              |      |          |       |     | -1.57 | ermin, ERM-like protein                                          | 7.07E-08 | Y        |          |          |
| <i>Wipf3</i>      | -2.05 | 2.67E-08 | 1.73E-06 | 3.1          | 1.5          |            | 1              |      |          |       |     |       | WAS/WASL interacting protein family, member 3                    | 8.36E-02 | N        |          |          |
| <i>Enc1</i>       | -1.64 | 2.70E-08 | 1.74E-06 | 45.2         | 27.6         | 1          | 1              |      | 1        |       |     | -1.53 | ectodermal-neural cortex 1 (with BTB-like domain)                | 1.46E-07 | Y        |          |          |
| <i>Kcnk16</i>     | 1.96  | 2.85E-08 | 1.83E-06 | 3.7          | 7.3          |            |                |      |          |       |     | 2.64  | potassium channel, subfamily K, member 16                        | 9.25E-17 | Y        |          |          |
| <i>Ehhadh</i>     | -2.09 | 2.88E-08 | 1.84E-06 | 4.0          | 1.9          |            |                |      |          |       |     |       | enoyl-CoA, hydratase/3-hydroxyacyl CoA dehydrogenase             | 2.38E-01 | N        |          |          |
| <i>LOC691995</i>  | -1.61 | 3.20E-08 | 2.03E-06 | 325.3        | 202.0        |            |                |      |          |       |     | -1.79 |                                                                  | 2.72E-14 | Y        |          |          |
| <i>Cnksr3</i>     | 1.65  | 3.26E-08 | 2.06E-06 | 23.0         | 37.9         |            |                |      |          |       |     | 2.13  | CNKS family member 3                                             | 2.55E-19 | Y        |          |          |
| <i>Dnah1</i>      | 1.63  | 3.50E-08 | 2.20E-06 | 10.8         | 17.6         |            |                |      |          |       |     | 2.10  | dynein, axonemal, heavy chain 1                                  | 4.03E-21 | Y        |          |          |
| <i>Ccdc120</i>    | 1.76  | 3.75E-08 | 2.34E-06 | 9.8          | 17.3         |            |                |      |          |       |     | 1.98  | coiled-coil domain containing 120                                | 1.40E-10 | Y        |          |          |
| <i>Icmt</i>       | 1.64  | 4.10E-08 | 2.55E-06 | 52.3         | 85.6         | 1          |                |      |          |       |     | 2.38  | isoprenylcysteine carboxyl methyltransferase                     | 1.81E-26 | Y        |          |          |
| <i>Rcan2</i>      | -1.61 | 4.12E-08 | 2.55E-06 | 103.8        | 64.5         |            | 1              |      |          |       |     | -1.72 | regulator of calcineurin 2                                       | 1.62E-12 | Y        |          |          |
| <i>Ccdc135</i>    | 1.77  | 4.14E-08 | 2.55E-06 | 7.0          | 12.4         |            |                |      |          |       |     | 2.20  | coiled-coil domain containing 135                                | 7.44E-17 | Y        |          |          |
| <i>Cd83</i>       | -1.66 | 4.17E-08 | 2.55E-06 | 45.4         | 27.4         |            | 1              |      |          |       |     | -1.74 | CD83 molecule                                                    | 9.45E-11 | Y        |          |          |
| <i>Tcfap2d</i>    | -2.41 | 4.20E-08 | 2.55E-06 | 6.0          | 2.5          |            |                |      |          |       |     |       |                                                                  | 0.00E+00 | N        |          |          |
| <i>Apln</i>       | -1.75 | 4.21E-08 | 2.55E-06 | 12.8         | 7.3          | 2          |                |      |          |       |     | -1.31 | apelin                                                           | 1.05E-02 | Y        |          |          |
| <i>B3galt5</i>    | -1.66 | 4.26E-08 | 2.57E-06 | 17.3         | 10.4         |            |                |      |          |       |     | -1.38 | UDP-Gal:betaGlcNAc beta 1,3-galactosyltransferase, polypeptide 5 | 2.91E-04 | Y        |          |          |
| <i>Apoa5</i>      | -2.36 | 4.29E-08 | 2.57E-06 | 4.2          | 1.8          |            |                |      |          |       |     |       | apolipoprotein A-V                                               | 5.80E-02 | N        |          |          |
| <i>Dusp5</i>      | 1.70  | 4.32E-08 | 2.58E-06 | 13.7         | 23.2         |            |                |      |          |       |     | 3.36  | dual specificity phosphatase 5                                   | 8.31E-35 | Y        |          |          |
| <i>Qdpr</i>       | -1.62 | 4.49E-08 | 2.67E-06 | 165.5        | 102.1        |            | 2              |      | 2        |       |     | -1.56 | quinoid dihydropteridine reductase                               | 2.22E-08 | Y        |          |          |
| <i>Ttpa</i>       | -1.84 | 4.52E-08 | 2.67E-06 | 11.9         | 6.5          |            |                |      |          |       |     |       | tocopherol (alpha) transfer protein                              | 5.14E-01 | N        |          |          |
| <i>Ebf3</i>       | -1.64 | 4.84E-08 | 2.85E-06 | 27.0         | 16.5         |            |                | 1    |          |       |     | -1.30 | early B-cell factor 3                                            | 7.42E-03 | Y        |          |          |
| <i>Mapk15</i>     | 1.84  | 4.99E-08 | 2.92E-06 | 6.8          | 12.5         |            |                |      |          |       |     | 2.18  | mitogen-activated protein kinase 15                              | 2.57E-14 | Y        |          |          |
| <i>Vwa3a</i>      | 1.66  | 5.23E-08 | 3.05E-06 | 13.0         | 21.5         |            |                |      |          |       |     | 1.87  | von Willebrand factor A domain containing 3A                     | 5.96E-14 | Y        |          |          |
| <i>Tspan9</i>     | 1.60  | 5.73E-08 | 3.32E-06 | 51.7         | 82.9         |            |                |      |          |       |     | 2.77  | tetraspanin 9                                                    | 1.07E-38 | Y        |          |          |
| <i>Col1a2</i>     | 1.65  | 5.75E-08 | 3.32E-06 | 13.6         | 22.4         |            | 1              |      |          |       |     | 2.18  | collagen, type I, alpha 2                                        | 4.84E-21 | Y        |          |          |
| <i>Leprel2</i>    | 1.62  | 5.77E-08 | 3.32E-06 | 49.1         | 79.8         |            |                |      |          |       |     | 1.58  | leprecan-like 2                                                  | 3.46E-08 | Y        |          |          |
| <i>Lhb</i>        | 3.81  | 6.02E-08 | 3.44E-06 | 1.4          | 5.2          |            |                |      |          |       |     | 2.25  | luteinizing hormone beta polypeptide                             | 5.23E-04 | Y        |          |          |
| <i>Inpp5j</i>     | 1.63  | 6.23E-08 | 3.55E-06 | 24.1         | 39.3         |            |                |      |          |       |     | 2.18  | inositol polyphosphate-5-phosphatase J                           | 1.31E-20 | Y        |          |          |
| <i>Gas2l2</i>     | 1.87  | 6.26E-08 | 3.55E-06 | 3.5          | 6.6          |            |                |      |          |       |     | 2.19  | growth arrest-specific 2 like 2                                  | 2.13E-13 | Y        |          |          |
| <i>Dgkz</i>       | 1.59  | 6.97E-08 | 3.93E-06 | 108.1        | 172.2        |            |                |      |          |       |     | 2.00  | diacylglycerol kinase, zeta                                      | 2.89E-19 | Y        |          |          |
| <i>lqcg</i>       | 1.91  | 7.05E-08 | 3.96E-06 | 5.4          | 10.4         |            |                |      |          |       |     | 2.06  | IQ motif containing G                                            | 3.42E-11 | Y        |          |          |

Supplementary Table 1

| gene              | FC    | Pvalue   | FDR      | control RPKM | alcohol RPKM | P drinking | P vs. NP naïve | GWAS | GE in PM | AcbSh | CeA  | DRN   | gene title                                                   | DRN FDR  | same dir | PAG+ ACB | PAG+ CeA |
|-------------------|-------|----------|----------|--------------|--------------|------------|----------------|------|----------|-------|------|-------|--------------------------------------------------------------|----------|----------|----------|----------|
| <i>Gfap</i>       | 1.59  | 7.29E-08 | 4.07E-06 | 245.0        | 388.9        |            | 2              |      | 2        |       |      | 1.81  | glial fibrillary acidic protein                              | 9.02E-15 | Y        |          |          |
| <i>Cxcr4</i>      | 1.95  | 7.44E-08 | 4.14E-06 | 4.7          | 9.1          | 1          | 1              |      | 1        |       |      | 1.45  | chemokine (C-X-C motif) receptor 4                           | 6.75E-04 | Y        |          |          |
| <i>Col3a1</i>     | 1.66  | 7.61E-08 | 4.21E-06 | 10.1         | 16.7         | 1          |                |      |          |       |      | 1.85  | collagen, type III, alpha 1                                  | 3.10E-13 | Y        |          |          |
| <i>Pex5l</i>      | -1.62 | 7.81E-08 | 4.30E-06 | 72.0         | 44.4         | 1          | 1              |      | 1        |       | -1.2 | -1.46 | peroxisomal biogenesis factor 5-like                         | 6.84E-06 | Y        |          | Y        |
| <i>Ppp1r1b</i>    | 1.62  | 8.17E-08 | 4.48E-06 | 50.5         | 82.0         |            | 1              |      |          |       |      | 2.21  | protein phosphatase 1, regulatory (inhibitor) subunit 1B     | 4.55E-22 | Y        |          |          |
| <i>Myo7a</i>      | 1.71  | 8.22E-08 | 4.49E-06 | 3.9          | 6.6          |            |                |      | 1        |       |      | 2.30  | myosin VIIA                                                  | 4.29E-19 | Y        |          |          |
| <i>Rps6ka1</i>    | 1.62  | 8.86E-08 | 4.82E-06 | 38.1         | 62.0         |            | 1              |      | 2        |       |      | 2.66  | ribosomal protein S6 kinase, 90kDa, polypeptide 1            | 3.61E-30 | Y        |          |          |
| <i>St8sia5</i>    | 1.66  | 8.99E-08 | 4.86E-06 | 35.3         | 58.7         |            | 1              |      |          |       |      | 3.03  | ST8 alpha-N-acetyl-neuraminide alpha-2,8-sialyltransferase 5 | 3.66E-33 | Y        |          |          |
| <i>Gabrg3</i>     | -1.82 | 9.02E-08 | 4.86E-06 | 14.3         | 7.9          |            |                |      |          |       |      | -1.42 | gamma-aminobutyric acid (GABA) A receptor, gamma 3           | 7.34E-04 | Y        |          |          |
| <i>Lingo3</i>     | 1.79  | 9.33E-08 | 5.00E-06 | 7.5          | 13.4         |            |                |      |          |       |      | 2.93  | leucine rich repeat and Ig domain containing 3               | 3.23E-21 | Y        |          |          |
| <i>Vwc2</i>       | -1.83 | 9.75E-08 | 5.21E-06 | 6.5          | 3.5          |            | 1              |      |          |       |      | -1.78 | von Willebrand factor C domain containing 2                  | 4.76E-09 | Y        |          |          |
| <i>Hs6st2</i>     | -1.72 | 9.85E-08 | 5.24E-06 | 17.1         | 9.9          |            |                |      |          |       |      | -1.66 | heparan sulfate 6-O-sulfotransferase 2                       | 1.75E-09 | Y        |          |          |
| <i>Dpf3</i>       | 1.68  | 1.01E-07 | 5.35E-06 | 26.7         | 44.7         |            |                |      |          |       |      | 3.00  |                                                              | 7.62E-30 | Y        |          |          |
| <i>Ctxn3</i>      | 1.67  | 1.08E-07 | 5.69E-06 | 22.5         | 37.6         |            |                |      |          |       |      | 2.35  | cortexin 3                                                   | 9.77E-22 | Y        |          |          |
| <i>Trerf1</i>     | -1.78 | 1.10E-07 | 5.77E-06 | 7.0          | 3.9          |            | 1              |      | 1        |       |      | -1.46 | transcriptional regulating factor 1                          | 1.39E-04 | Y        |          |          |
| <i>Arg1</i>       | -1.92 | 1.15E-07 | 5.98E-06 | 10.9         | 5.7          |            | 1              |      |          |       |      | -1.42 | arginase, liver                                              | 1.08E-02 | Y        |          |          |
| <i>Oplah</i>      | 1.61  | 1.15E-07 | 5.98E-06 | 22.8         | 36.8         |            |                |      |          |       |      | 2.21  | 5-oxoprolinase (ATP-hydrolysing)                             | 1.22E-21 | Y        |          |          |
| <i>Neurod6</i>    | 1.88  | 1.16E-07 | 6.01E-06 | 4.7          | 8.8          |            |                |      |          |       |      | 2.79  | neuronal differentiation 6                                   | 3.87E-18 | Y        |          |          |
| <i>Calb1</i>      | 1.58  | 1.18E-07 | 6.09E-06 | 201.2        | 318.0        |            | 1              |      |          |       |      | 3.04  | calbindin 1, 28kDa                                           | 3.68E-47 | Y        |          |          |
| <i>Camkk2</i>     | 1.60  | 1.21E-07 | 6.22E-06 | 51.7         | 82.9         |            | 3              |      |          |       |      | 1.97  | calcium/calmodulin-dependent protein kinase kinase 2, beta   | 1.92E-16 | Y        |          |          |
| <i>Ifi27l2b</i>   | -3.30 | 1.25E-07 | 6.39E-06 | 7.5          | 2.3          |            | 2              |      |          |       |      | -1.58 |                                                              | 4.22E-02 | Y        |          |          |
| <i>Scn7a</i>      | -1.88 | 1.28E-07 | 6.49E-06 | 2.9          | 1.6          |            |                |      |          |       |      |       | sodium channel, voltage-gated, type VII, alpha subunit       | 3.43E-01 | N        |          |          |
| <i>Cck</i>        | -1.88 | 1.28E-07 | 6.49E-06 | 25.2         | 13.4         |            |                |      |          |       |      |       | cholecystokinin                                              | 7.53E-02 | N        |          |          |
| <i>Rtn4r</i>      | 1.73  | 1.41E-07 | 7.12E-06 | 13.7         | 23.7         |            |                |      |          |       |      | 2.28  | reticulon 4 receptor                                         | 9.80E-14 | Y        |          |          |
| <i>RGD1310269</i> | -1.59 | 1.48E-07 | 7.44E-06 | 76.8         | 48.2         |            |                |      |          |       |      | -1.73 |                                                              | 2.02E-12 | Y        |          |          |
| <i>Cldn11</i>     | -1.58 | 1.55E-07 | 7.76E-06 | 190.1        | 120.6        | 1          | 1              |      | 1        |       |      | -1.42 | claudin 11                                                   | 2.05E-05 | Y        |          |          |
| <i>Gja1</i>       | -1.58 | 1.59E-07 | 7.93E-06 | 110.4        | 70.0         | 1          |                |      | 2        |       |      |       | gap junction protein, alpha 1, 43kDa                         | 8.94E-01 | N        |          |          |
| <i>Casq2</i>      | 1.77  | 1.60E-07 | 7.95E-06 | 5.9          | 10.5         |            |                |      |          |       |      | 2.70  | calsequestrin 2 (cardiac muscle)                             | 2.16E-20 | Y        |          |          |
| <i>Slit1</i>      | -1.64 | 1.73E-07 | 8.54E-06 | 15.5         | 9.4          |            | 4              | 1    |          |       |      | -1.64 | slit homolog 1 (Drosophila)                                  | 4.59E-09 | Y        |          |          |
| <i>Cllic6</i>     | 1.81  | 1.74E-07 | 8.54E-06 | 5.1          | 9.3          |            |                |      |          |       |      | 2.93  | chloride intracellular channel 6                             | 4.67E-17 | Y        |          |          |
| <i>Rps6ka6</i>    | -1.76 | 1.74E-07 | 8.54E-06 | 10.5         | 5.9          |            |                |      |          |       |      | -1.78 | ribosomal protein S6 kinase, 90kDa, polypeptide 6            | 1.04E-10 | Y        |          |          |
| <i>LOC690333</i>  | -1.76 | 1.83E-07 | 8.95E-06 | 9.0          | 5.1          |            |                |      |          |       |      | -1.75 |                                                              | 8.03E-11 | Y        |          |          |
| <i>liig9</i>      | 1.65  | 2.11E-07 | 1.03E-05 | 23.6         | 39.0         |            |                |      |          |       |      | 2.18  |                                                              | 3.07E-19 | Y        |          |          |
| <i>Efhb</i>       | 1.85  | 2.14E-07 | 1.04E-05 | 3.7          | 6.8          |            |                |      |          |       |      | 2.25  | EF-hand domain family, member B                              | 7.08E-14 | Y        |          |          |
| <i>Elfn1</i>      | -1.82 | 2.15E-07 | 1.04E-05 | 4.8          | 2.6          |            |                |      |          |       |      | -1.34 | extracellular leucine-rich repeat and fibronectin type III   | 1.54E-02 | Y        |          |          |
| <i>Rbm11</i>      | -2.10 | 2.25E-07 | 1.08E-05 | 3.8          | 1.8          |            |                |      |          |       |      | -1.52 | RNA binding motif protein 11                                 | 9.37E-04 | Y        |          |          |
| <i>Tekt1</i>      | 1.81  | 2.27E-07 | 1.09E-05 | 8.3          | 15.1         |            | 2              |      |          |       |      | 1.68  | tektin 1                                                     | 4.31E-07 | Y        |          |          |
| <i>Usp29</i>      | -1.56 | 2.44E-07 | 1.16E-05 | 59.6         | 38.2         |            |                |      |          |       |      | -1.73 | ubiquitin specific peptidase 29                              | 1.01E-12 | Y        |          |          |
| <i>Syt1</i>       | 2.09  | 2.53E-07 | 1.20E-05 | 2.1          | 4.5          |            |                |      |          |       |      | 4.26  | synaptotagmin-like 1                                         | 2.04E-13 | Y        |          |          |
| <i>Tacr1</i>      | -1.75 | 2.60E-07 | 1.23E-05 | 7.8          | 4.5          |            | 1              |      |          |       |      | -1.82 | tachykinin receptor 1                                        | 3.77E-08 | Y        |          |          |

Supplementary Table 1

| gene              | FC    | Pvalue   | FDR      | control RPKM | alcohol RPKM | P drinking | P vs. NP naïve | GWAS | GE in PM | AcbSh | CeA | DRN   | gene title                                                         | DRN FDR  | same dir | PAG+ ACB | PAG+ CeA |
|-------------------|-------|----------|----------|--------------|--------------|------------|----------------|------|----------|-------|-----|-------|--------------------------------------------------------------------|----------|----------|----------|----------|
| <i>Syt12</i>      | 1.60  | 2.66E-07 | 1.25E-05 | 33.1         | 53.0         |            |                |      | 1        |       |     | 1.95  | synaptotagmin XII                                                  | 3.29E-15 | Y        |          |          |
| <i>Pik3r3</i>     | 1.59  | 2.67E-07 | 1.25E-05 | 61.6         | 98.0         | 1          |                |      |          |       |     | 1.80  | phosphoinositide-3-kinase, regulatory subunit 3 (gamma)            | 1.66E-12 | Y        |          |          |
| <i>Zmat4</i>      | -1.70 | 2.75E-07 | 1.29E-05 | 9.2          | 5.4          |            | 1              |      |          |       |     | -1.49 | zinc finger, matrin-type 4                                         | 8.36E-05 | Y        |          |          |
| <i>Acs11</i>      | -1.59 | 2.80E-07 | 1.31E-05 | 36.3         | 22.8         | 1          | 1              |      |          |       |     | -1.20 | acyl-CoA synthetase long-chain family member 1                     | 5.00E-02 | Y        |          |          |
| <i>Ncald</i>      | -1.57 | 2.84E-07 | 1.32E-05 | 86.9         | 55.5         |            |                |      |          |       |     | -1.74 | neurocalcin delta                                                  | 4.65E-13 | Y        |          |          |
| <i>Sla</i>        | 1.80  | 3.01E-07 | 1.39E-05 | 6.7          | 12.2         |            |                |      |          |       |     | 2.72  | Src-like-adaptor                                                   | 2.56E-20 | Y        |          |          |
| <i>Gabra5</i>     | -1.65 | 3.11E-07 | 1.43E-05 | 19.4         | 11.7         |            | 1              |      | 1        |       |     | -1.80 | gamma-aminobutyric acid (GABA) A receptor, alpha 5                 | 2.17E-11 | Y        |          |          |
| <i>Fmo3</i>       | -3.62 | 3.14E-07 | 1.44E-05 | 1.4          | 0.4          |            |                |      |          |       |     | -2.02 | flavin containing monooxygenase 3                                  | 3.53E-03 | Y        |          |          |
| <i>Gabra2</i>     | -1.58 | 3.24E-07 | 1.48E-05 | 66.8         | 42.3         |            | 2              |      | 3        |       |     | -1.62 | gamma-aminobutyric acid (GABA) A receptor, alpha 2                 | 1.32E-09 | Y        |          |          |
| <i>Stac3</i>      | -4.47 | 3.37E-07 | 1.54E-05 | 1.4          | 0.3          |            |                |      |          |       |     |       | SH3 and cysteine rich domain 3                                     | 0.00E+00 | N        |          |          |
| <i>Hist2h4</i>    | 1.73  | 3.45E-07 | 1.56E-05 | 40.9         | 70.7         |            |                |      |          |       |     | 1.92  |                                                                    | 5.47E-11 | Y        |          |          |
| <i>RGD1560691</i> | -1.61 | 3.45E-07 | 1.56E-05 | 19.9         | 12.4         |            |                |      |          |       |     |       |                                                                    | 6.76E-01 | N        |          |          |
| <i>Cbln4</i>      | -1.80 | 3.52E-07 | 1.59E-05 | 7.0          | 3.9          |            |                |      |          |       |     | -1.83 | cerebellin 4 precursor                                             | 7.38E-14 | Y        |          |          |
| <i>Meis1</i>      | 1.58  | 3.64E-07 | 1.63E-05 | 35.9         | 56.6         |            |                | 1    |          |       |     | 2.16  | Meis homeobox 1                                                    | 1.13E-20 | Y        |          |          |
| <i>Rtkn2</i>      | -2.63 | 3.75E-07 | 1.68E-05 | 1.1          | 0.4          |            |                |      |          |       |     |       | rhotekin 2                                                         | 2.76E-01 | N        |          |          |
| <i>Raly1</i>      | -1.64 | 3.77E-07 | 1.68E-05 | 35.5         | 21.6         |            |                | 1    |          |       |     | -1.71 | RALY RNA binding protein-like                                      | 1.35E-10 | Y        |          |          |
| <i>Gpr165</i>     | -1.56 | 3.84E-07 | 1.71E-05 | 69.1         | 44.2         |            |                |      |          |       |     | -1.72 |                                                                    | 3.20E-12 | Y        |          |          |
| <i>Tmem132a</i>   | 1.56  | 3.89E-07 | 1.72E-05 | 75.5         | 117.3        |            | 1              |      |          |       |     | 1.91  | transmembrane protein 132A                                         | 2.54E-16 | Y        |          |          |
| <i>Egr4</i>       | 2.19  | 3.99E-07 | 1.76E-05 | 1.7          | 3.7          |            | 1              |      |          |       |     | 7.48  | early growth response 4                                            | 3.91E-19 | Y        |          |          |
| <i>Nap115</i>     | -1.54 | 4.04E-07 | 1.77E-05 | 537.1        | 348.4        |            | 1              |      |          |       |     | -1.80 | nucleosome assembly protein 1-like 5                               | 7.55E-15 | Y        |          |          |
| <i>Pak3</i>       | -1.59 | 4.05E-07 | 1.77E-05 | 49.8         | 31.3         |            |                |      | 2        |       |     | -1.78 | p21 protein (Cdc42/Rac)-activated kinase 3                         | 2.10E-13 | Y        |          |          |
| <i>Hebp2</i>      | -1.97 | 4.15E-07 | 1.81E-05 | 5.2          | 2.6          |            | 1              |      | 1        |       |     | -1.72 | heme binding protein 2                                             | 5.60E-08 | Y        |          |          |
| <i>Ppp1r3b</i>    | -2.24 | 4.46E-07 | 1.94E-05 | 1.6          | 0.7          |            |                |      |          |       |     | -1.47 | protein phosphatase 1, regulatory subunit 3B                       | 2.45E-02 | Y        |          |          |
| <i>Tnfrsf25</i>   | -2.13 | 4.49E-07 | 1.94E-05 | 2.1          | 1.0          |            | 1              |      |          |       |     |       | tumor necrosis factor, alpha-induced protein 2                     | 9.94E-01 | N        |          |          |
| <i>Cfh</i>        | -1.64 | 4.61E-07 | 1.99E-05 | 12.5         | 7.6          | 1          | 1              |      |          |       |     |       | complement factor H                                                | 4.41E-01 | N        |          |          |
| <i>Amy1a</i>      | -2.61 | 4.75E-07 | 2.04E-05 | 2.8          | 1.1          |            |                |      |          |       |     |       | amylase, alpha 1A (salivary)                                       | 6.63E-02 | N        |          |          |
| <i>Grm1</i>       | 1.55  | 4.98E-07 | 2.13E-05 | 29.9         | 46.4         | 1          | 1              |      |          |       |     | 2.06  | glutamate receptor, metabotropic 1                                 | 2.42E-20 | Y        |          |          |
| <i>Dpysl4</i>     | 1.56  | 5.01E-07 | 2.14E-05 | 45.5         | 71.1         |            |                |      |          |       |     | 1.48  | dihydropyrimidinase-like 4                                         | 2.32E-06 | Y        |          |          |
| <i>Nrsn2</i>      | -1.57 | 5.27E-07 | 2.24E-05 | 108.8        | 69.5         |            |                |      |          |       |     | -1.63 | neurensin 2                                                        | 8.41E-10 | Y        |          |          |
| <i>Zfyve28</i>    | 1.56  | 5.43E-07 | 2.30E-05 | 26.6         | 41.6         |            | 1              |      |          |       |     | 2.13  | zinc finger, FYVE domain containing 28                             | 3.53E-20 | Y        |          |          |
| <i>Ddah1</i>      | -1.62 | 5.60E-07 | 2.37E-05 | 24.6         | 15.1         |            | 1              | 1    | 1        |       |     | -1.38 | dimethylarginine dimethylaminohydrolase 1                          | 1.78E-04 | Y        |          |          |
| <i>Ano4</i>       | -1.59 | 5.67E-07 | 2.39E-05 | 21.9         | 13.7         |            |                |      | 1        |       |     | -1.33 | anoctamin 4                                                        | 1.79E-03 | Y        |          |          |
| <i>Kcns3</i>      | -2.00 | 5.72E-07 | 2.40E-05 | 4.5          | 2.2          |            | 1              |      |          |       |     | -1.47 | potassium voltage-gated channel, delayed-rectifier, subfamily S, m | 4.20E-03 | Y        |          |          |
| <i>Gpc3</i>       | -1.92 | 5.94E-07 | 2.48E-05 | 5.8          | 3.0          |            | 1              |      |          |       |     | -1.55 | glypican 3                                                         | 3.95E-06 | Y        |          |          |
| <i>Dgkq</i>       | 1.56  | 6.05E-07 | 2.52E-05 | 35.9         | 55.8         | 1          |                |      |          |       |     | 2.16  | diacylglycerol kinase, gamma 90kDa                                 | 1.26E-21 | Y        |          |          |
| <i>Rnf19b</i>     | 1.62  | 6.14E-07 | 2.55E-05 | 26.3         | 42.6         |            |                |      |          |       |     | 1.71  | ring finger protein 19B                                            | 6.01E-09 | Y        |          |          |
| <i>Epha8</i>      | 1.67  | 6.20E-07 | 2.56E-05 | 7.1          | 11.9         |            |                |      |          |       |     | 2.51  | EPH receptor A8                                                    | 3.74E-17 | Y        |          |          |
| <i>Crtam</i>      | 1.74  | 6.21E-07 | 2.56E-05 | 7.4          | 12.8         |            |                |      |          |       |     | 4.87  | cytotoxic and regulatory T cell molecule                           | 6.93E-31 | Y        |          |          |
| <i>Myo5b</i>      | -1.69 | 6.28E-07 | 2.58E-05 | 5.3          | 3.2          |            | 1              |      | 1        |       |     | -1.71 | myosin VB                                                          | 4.41E-10 | Y        |          |          |
| <i>Evi2a</i>      | -1.63 | 6.35E-07 | 2.60E-05 | 36.9         | 22.7         |            |                |      |          |       |     | -1.68 | ecotropic viral integration site 2A                                | 3.54E-09 | Y        |          |          |
| <i>RGD1312005</i> | -1.56 | 6.43E-07 | 2.62E-05 | 75.6         | 48.4         |            |                |      |          |       |     | -1.59 |                                                                    | 7.44E-09 | Y        |          |          |

Supplementary Table 1

| gene              | FC    | Pvalue   | FDR      | control RPKM | alcohol RPKM | P drinking | P vs. NP naïve | GWAS | GE in PM | AcbSh | CeA | DRN   | gene title                                                                                     | DRN FDR  | same dir | PAG+ ACB | PAG+ CeA |
|-------------------|-------|----------|----------|--------------|--------------|------------|----------------|------|----------|-------|-----|-------|------------------------------------------------------------------------------------------------|----------|----------|----------|----------|
| <i>Odz2</i>       | -1.56 | 6.48E-07 | 2.64E-05 | 19.6         | 12.6         | 1          |                |      |          |       |     |       | odz, odd Oz/ten-m homolog 2 (Drosophila)                                                       | 4.41E-01 | N        |          |          |
| <i>Ptprr</i>      | 1.56  | 6.56E-07 | 2.65E-05 | 26.1         | 40.7         |            |                |      |          |       |     | 1.82  | protein tyrosine phosphatase, receptor type, R                                                 | 1.86E-13 | Y        |          |          |
| <i>Zdhhc14</i>    | 1.70  | 6.57E-07 | 2.65E-05 | 12.1         | 20.6         |            | 1              |      |          |       |     | 1.68  | zinc finger, DHHC-type containing 14                                                           | 1.05E-06 | Y        |          |          |
| <i>Baiap2</i>     | 1.60  | 6.74E-07 | 2.71E-05 | 26.2         | 41.9         | 1          | 1              |      | 1        |       |     | 1.98  | BAI1-associated protein 2                                                                      | 7.14E-14 | Y        |          |          |
| <i>Col18a1</i>    | 1.59  | 7.06E-07 | 2.83E-05 | 11.0         | 17.4         |            |                |      |          |       |     | 2.66  | collagen, type XVIII, alpha 1                                                                  | 2.01E-28 | Y        |          |          |
| <i>Dcaf12l1</i>   | -1.56 | 7.20E-07 | 2.88E-05 | 39.3         | 25.2         |            |                |      |          |       |     | -1.58 | DDB1 and CUL4 associated factor 12-like 1                                                      | 1.99E-08 | Y        |          |          |
| <i>Prrxl1</i>     | -5.00 | 7.25E-07 | 2.89E-05 | 0.7          | 0.1          |            |                |      |          |       |     |       | microsomal glutathione S-transferase 1                                                         | 0.00E+00 | N        |          |          |
| <i>Mgst1</i>      | -1.66 | 7.48E-07 | 2.97E-05 | 42.9         | 25.8         |            |                |      |          |       |     |       |                                                                                                | 5.90E-01 | N        |          |          |
| <i>LOC688553</i>  | 1.93  | 7.67E-07 | 3.04E-05 | 4.2          | 8.1          |            |                |      |          |       |     | 2.02  |                                                                                                | 2.20E-08 | Y        |          |          |
| <i>Uchl1</i>      | -1.53 | 7.84E-07 | 3.10E-05 | 704.5        | 461.7        | 1          |                |      |          |       |     | -1.73 | ubiquitin carboxyl-terminal esterase L1 (ubiquitin thiolesterase)                              | 4.92E-13 | Y        |          |          |
| <i>Nrip3</i>      | -1.57 | 8.00E-07 | 3.15E-05 | 26.4         | 16.8         |            | 1              |      |          |       |     | -1.61 | nuclear receptor interacting protein 3                                                         | 2.38E-09 | Y        |          |          |
| <i>Slc22a18</i>   | -3.22 | 8.27E-07 | 3.24E-05 | 2.0          | 0.6          |            |                | 1    |          |       |     |       | solute carrier family 22, member 18                                                            | 5.49E-01 | N        |          |          |
| <i>Vamp1</i>      | -1.52 | 8.37E-07 | 3.27E-05 | 377.0        | 247.7        | 1          | 1              |      |          |       |     |       | vesicle-associated membrane protein 1 (synaptobrevin 1)                                        | 1.69E-01 | N        |          |          |
| <i>Bmp1</i>       | 1.57  | 8.40E-07 | 3.27E-05 | 19.2         | 30.1         |            |                |      |          |       |     | 1.75  | bone morphogenetic protein 1                                                                   | 1.02E-10 | Y        |          |          |
| <i>Plcl1</i>      | -1.56 | 8.57E-07 | 3.33E-05 | 22.9         | 14.7         |            |                | 1    |          |       |     | -1.61 | phospholipase C-like 1                                                                         | 1.68E-09 | Y        |          |          |
| <i>Scn1b</i>      | 1.53  | 8.81E-07 | 3.41E-05 | 163.5        | 250.5        |            | 1              |      | 1        |       |     | 2.08  | sodium channel, voltage-gated, type I, beta subunit                                            | 7.02E-21 | Y        |          |          |
| <i>Oprl1</i>      | -1.61 | 8.84E-07 | 3.41E-05 | 18.6         | 11.5         |            |                |      |          |       |     | -1.52 | opiate receptor-like 1                                                                         | 2.73E-06 | Y        |          |          |
| <i>Mog</i>        | -1.55 | 8.95E-07 | 3.44E-05 | 98.9         | 63.8         | 2          |                |      | 1        |       |     | -1.51 | myelin oligodendrocyte glycoprotein                                                            | 5.58E-07 | Y        |          |          |
| <i>Rab9b</i>      | -1.56 | 9.10E-07 | 3.48E-05 | 49.8         | 32.0         |            |                |      |          |       |     | -1.62 | RAB9B, member RAS oncogene family                                                              | 2.82E-09 | Y        |          |          |
| <i>Cxcr5</i>      | 5.69  | 9.11E-07 | 3.48E-05 | 0.3          | 1.5          |            |                |      |          |       |     |       | chemokine (C-X-C motif) receptor 5                                                             | 0.00E+00 | N        |          |          |
| <i>Slitrk3</i>    | -1.60 | 9.18E-07 | 3.50E-05 | 20.1         | 12.6         |            |                |      |          |       |     | -1.35 | SLIT and NTRK-like family, member 3                                                            | 1.12E-03 | Y        |          |          |
| <i>Grem2</i>      | -1.60 | 9.47E-07 | 3.60E-05 | 16.9         | 10.5         |            | 1              |      |          |       |     | -1.75 | gremlin 2                                                                                      | 9.87E-12 | Y        |          |          |
| <i>Pold2</i>      | 1.74  | 9.68E-07 | 3.67E-05 | 7.7          | 13.4         | 1          | 1              |      | 1        |       |     | 1.27  | polymerase (DNA directed), delta 2, accessory subunit                                          | 4.97E-02 | Y        |          |          |
| <i>Tox2</i>       | -1.69 | 9.91E-07 | 3.74E-05 | 14.4         | 8.5          |            |                | 1    |          |       |     | -1.59 | TOX high mobility group box family member 2                                                    | 9.75E-07 | Y        |          |          |
| <i>RGD1305627</i> | 2.10  | 1.00E-06 | 3.75E-05 | 2.9          | 6.2          |            |                |      |          |       |     | 3.20  |                                                                                                | 3.73E-13 | Y        |          |          |
| <i>Iqsec3</i>     | -1.53 | 1.00E-06 | 3.75E-05 | 35.9         | 23.4         |            | 1              |      |          |       |     | -1.23 | IQ motif and Sec7 domain 3                                                                     | 1.92E-02 | Y        |          |          |
| <i>Gjc2</i>       | -1.61 | 1.01E-06 | 3.78E-05 | 25.5         | 15.9         |            |                |      | 1        |       |     | -1.34 | gap junction protein, gamma 2, 47kDa                                                           | 2.89E-03 | Y        |          |          |
| <i>Pgbd5</i>      | 1.55  | 1.02E-06 | 3.80E-05 | 42.6         | 66.2         |            | 1              |      |          |       |     | 2.17  | piggyBac transposable element derived 5 discs, large (Drosophila) homolog-associated protein 2 | 4.08E-21 | Y        |          |          |
| <i>Dlgap2</i>     | -1.65 | 1.03E-06 | 3.81E-05 | 9.5          | 5.7          | 2          | 2              | 1    |          |       |     | -1.30 |                                                                                                | 1.67E-02 | Y        |          |          |
| <i>Fa2h</i>       | -1.58 | 1.03E-06 | 3.81E-05 | 31.6         | 20.0         | 1          |                |      | 1        |       |     | -1.42 | fatty acid 2-hydroxylase                                                                       | 8.27E-05 | Y        |          |          |
| <i>Lpar1</i>      | -1.55 | 1.03E-06 | 3.81E-05 | 49.3         | 31.9         |            |                |      |          |       |     | -1.39 | lysophosphatidic acid receptor 1                                                               | 8.02E-05 | Y        |          |          |
| <i>Sstr1</i>      | -1.66 | 1.08E-06 | 3.98E-05 | 8.7          | 5.2          | 1          | 1              |      | 2        |       |     | -1.55 | somatostatin receptor 1                                                                        | 1.13E-06 | Y        |          |          |
| <i>Zfhx4</i>      | -1.53 | 1.10E-06 | 4.04E-05 | 20.1         | 13.2         | 1          |                |      |          | -1.21 |     | -1.57 | zinc finger homeobox 4                                                                         | 1.49E-08 | Y        | Y        |          |
| <i>Nsdhl</i>      | -1.60 | 1.14E-06 | 4.16E-05 | 34.6         | 21.6         | 1          |                |      |          |       |     | -1.43 | NAD(P) dependent steroid dehydrogenase-like                                                    | 6.67E-05 | Y        |          |          |
| <i>Mical2</i>     | 1.53  | 1.14E-06 | 4.16E-05 | 72.6         | 110.9        |            |                | 1    |          |       |     | 2.20  | microtubule associated monooxygenase, calponin and LIM domain cont                             | 1.74E-23 | Y        |          |          |
| <i>Abcc6</i>      | -1.89 | 1.15E-06 | 4.17E-05 | 2.1          | 1.1          |            |                |      |          |       |     |       | ATP-binding cassette, sub-family C (CFTR/MRP), member 6                                        | 9.32E-01 | N        |          |          |
| <i>RGD1559613</i> | -1.70 | 1.15E-06 | 4.17E-05 | 37.1         | 21.8         |            |                |      |          |       |     | -1.66 |                                                                                                | 1.74E-08 | Y        |          |          |

Supplementary Table 1

| gene              | FC    | Pvalue   | FDR      | control RPKM | alcohol RPKM | P drinking | P vs. NP naïve | GWAS | GE in PM | AcbSh | CeA | DRN   | gene title                                                                                                  | DRN FDR  | same dir | PAG+ ACB | PAG+ CeA |
|-------------------|-------|----------|----------|--------------|--------------|------------|----------------|------|----------|-------|-----|-------|-------------------------------------------------------------------------------------------------------------|----------|----------|----------|----------|
| <i>Msx1</i>       | 1.77  | 1.17E-06 | 4.22E-05 | 5.9          | 10.4         |            |                |      |          |       |     | 2.44  | msh homeobox 1                                                                                              | 3.28E-15 | Y        |          |          |
| <i>Prr18</i>      | -1.64 | 1.17E-06 | 4.22E-05 | 40.9         | 24.9         |            |                |      |          |       |     | -1.34 | proline rich 18                                                                                             | 6.34E-03 | Y        |          |          |
| <i>St8sia6</i>    | -2.62 | 1.22E-06 | 4.38E-05 | 3.4          | 1.3          |            |                |      |          |       |     | -1.57 | ST8 alpha-N-acetyl-neuraminide alpha-2,8-sialyltransferase 6                                                | 5.62E-04 | Y        |          |          |
| <i>Dnali1</i>     | 1.64  | 1.22E-06 | 4.38E-05 | 10.4         | 17.1         |            |                |      |          |       |     | 2.13  | dynein, axonemal, light intermediate chain 1                                                                | 3.44E-16 | Y        |          |          |
| <i>Synpr</i>      | -1.60 | 1.23E-06 | 4.40E-05 | 35.5         | 22.2         |            | 1              |      |          |       |     | -1.71 | synaptoporin                                                                                                | 9.90E-10 | Y        |          |          |
| <i>Cntnap5b</i>   | -1.63 | 1.24E-06 | 4.42E-05 | 10.3         | 6.3          |            |                |      |          |       |     | -1.65 | contactin associated protein-like 5B                                                                        | 2.20E-08 | Y        |          |          |
| <i>Kcnt2</i>      | -1.68 | 1.25E-06 | 4.44E-05 | 8.6          | 5.1          |            |                |      |          |       |     | -1.61 | potassium channel, subfamily T, member 2                                                                    | 1.63E-06 | Y        |          |          |
| <i>RGD1307443</i> | -1.55 | 1.29E-06 | 4.57E-05 | 30.4         | 19.6         |            |                |      |          |       |     | -1.55 | ectonucleotide pyrophosphatase/phosphodiesterase 4 (putative)                                               | 6.04E-08 | Y        |          |          |
| <i>Gfra1</i>      | -1.56 | 1.30E-06 | 4.59E-05 | 27.6         | 17.7         |            | 1              |      | 1        |       |     | -1.56 | GDNF family receptor alpha 1                                                                                | 3.34E-08 | Y        |          |          |
| <i>Pxn</i>        | 1.57  | 1.32E-06 | 4.65E-05 | 14.5         | 22.8         |            |                |      | 1        |       |     | 1.74  | paxillin                                                                                                    | 8.17E-10 | Y        |          |          |
| <i>Itqb4</i>      | 1.73  | 1.36E-06 | 4.77E-05 | 2.1          | 3.6          |            |                |      | 1        |       |     | 2.22  | integrin, beta 4                                                                                            | 7.55E-12 | Y        |          |          |
| <i>Enpp4</i>      | -1.54 | 1.36E-06 | 4.77E-05 | 29.1         | 18.9         |            |                |      | 1        |       |     | -1.41 | D-amino-acid oxidase                                                                                        | 4.06E-05 | Y        |          |          |
| <i>Dao</i>        | 1.63  | 1.41E-06 | 4.93E-05 | 14.0         | 22.9         |            | 1              |      |          |       |     | 1.86  | GNAS complex locus                                                                                          | 2.36E-11 | Y        |          |          |
| <i>RGD1305679</i> | -2.52 | 1.43E-06 | 4.97E-05 | 4.1          | 1.6          |            |                |      |          |       |     |       |                                                                                                             | 1.92E-01 | N        |          |          |
| <i>Gnas</i>       | -1.61 | 1.43E-06 | 4.97E-05 | 42.8         | 26.5         |            | 2              |      | 1        |       |     | -2.03 |                                                                                                             | 8.86E-16 | Y        |          |          |
| <i>Tiam1</i>      | 1.52  | 1.44E-06 | 4.97E-05 | 38.8         | 59.0         | 1          | 1              | 1    | 2        |       |     | 2.37  | T-cell lymphoma invasion and metastasis 1 solute carrier family 1 (glial high affinity glutamate transporte | 2.22E-28 | Y        |          |          |
| <i>Slc1a3</i>     | 1.51  | 1.44E-06 | 4.97E-05 | 250.9        | 379.0        |            | 1              |      | 3        |       |     | 1.70  | basonuclein 2                                                                                               | 5.65E-12 | Y        |          |          |
| <i>Bnc2</i>       | -1.64 | 1.46E-06 | 5.03E-05 | 8.9          | 5.5          |            |                |      | 1        |       |     |       |                                                                                                             | 7.08E-01 | N        |          |          |
| <i>Grm4</i>       | 1.53  | 1.49E-06 | 5.12E-05 | 45.7         | 69.9         |            | 1              |      |          |       |     | 2.98  | glutamate receptor, metabotropic 4                                                                          | 1.24E-40 | Y        |          |          |
| <i>Kctd16</i>     | -1.66 | 1.53E-06 | 5.22E-05 | 22.5         | 13.6         |            |                |      |          |       |     | -1.41 | potassium channel tetramerisation domain containing 16                                                      | 2.29E-03 | Y        |          |          |
| <i>Dynlrb2</i>    | 1.64  | 1.53E-06 | 5.22E-05 | 40.7         | 66.9         |            |                |      | 1        |       |     | 1.90  | dynein, light chain, roadblock-type 2                                                                       | 1.05E-12 | Y        |          |          |
| <i>Kcng4</i>      | 1.54  | 1.68E-06 | 5.72E-05 | 21.5         | 33.1         |            |                |      |          |       |     | 2.15  | potassium voltage-gated channel, subfamily G, member 4                                                      | 1.33E-21 | Y        |          |          |
| <i>Aspa</i>       | -1.63 | 1.69E-06 | 5.74E-05 | 25.2         | 15.4         | 2          | 1              |      |          |       |     | -1.54 | aspartoacylase                                                                                              | 5.46E-06 | Y        |          |          |
| <i>Fam5c</i>      | -1.58 | 1.75E-06 | 5.93E-05 | 21.3         | 13.5         |            |                |      | 1        |       |     | -1.36 | family with sequence similarity 5, member C                                                                 | 6.14E-04 | Y        |          |          |
| <i>Gp1bb</i>      | 1.75  | 1.77E-06 | 5.98E-05 | 11.1         | 19.4         |            |                |      |          |       |     | 1.49  | glycoprotein Ib (platelet), beta polypeptide                                                                | 9.41E-04 | Y        |          |          |
| <i>Camkv</i>      | -1.53 | 1.78E-06 | 5.99E-05 | 47.4         | 31.0         | 1          | 1              |      | 1        |       |     | -1.48 | CaM kinase-like vesicle-associated                                                                          | 4.63E-06 | Y        |          |          |
| <i>Ubqln2</i>     | -1.53 | 1.79E-06 | 6.01E-05 | 48.5         | 31.7         |            |                |      |          |       |     |       | ubiquilin 2                                                                                                 | 2.43E-01 | N        |          |          |
| <i>Lrfr5</i>      | -1.56 | 1.80E-06 | 6.03E-05 | 5.8          | 3.7          |            |                |      |          |       |     | -1.51 | leucine rich repeat and fibronectin type III domain containing 5 /                                          | 5.67E-05 | Y        |          |          |
| <i>Ankrd33b</i>   | 2.22  | 1.81E-06 | 6.04E-05 | 1.5          | 3.4          |            | 1              |      |          |       |     | 3.99  | ankyrin repeat domain 33B                                                                                   | 1.53E-15 | Y        |          |          |
| <i>ErbB3</i>      | -1.57 | 1.82E-06 | 6.06E-05 | 15.5         | 9.8          |            |                |      |          |       |     | -1.30 | v-erb-b2 erythroblastic leukemia viral oncogene homolog 3 (avian) //                                        | 5.72E-03 | Y        |          |          |
| <i>Adamts4</i>    | -1.65 | 1.84E-06 | 6.09E-05 | 11.0         | 6.7          |            | 1              |      | 1        |       |     | -1.39 | ADAM metalloproteinase with thrombospondin type 1 motif, 4                                                  | 1.45E-03 | Y        |          |          |
| <i>Gcnt1</i>      | 1.54  | 1.84E-06 | 6.09E-05 | 14.6         | 22.4         | 1          |                |      |          |       |     | 3.21  | glucosaminyl (N-acetyl) transferase 1, core 2                                                               | 1.40E-41 | Y        |          |          |
| <i>Prkg2</i>      | -1.76 | 1.85E-06 | 6.11E-05 | 5.7          | 3.2          |            |                |      |          |       |     | -1.51 | protein kinase, cGMP-dependent, type II                                                                     | 5.70E-05 | Y        |          |          |
| <i>Isoc1</i>      | -1.53 | 1.91E-06 | 6.29E-05 | 46.7         | 30.5         |            | 1              |      | 1        |       |     | -1.29 | isochorismatase domain containing 1                                                                         | 2.89E-03 | Y        |          |          |

Supplementary Table 1

| gene              | FC    | Pvalue   | FDR      | control RPKM | alcohol RPKM | P drinking | P vs. NP naïve | GWAS | GE in PM | AcbSh | CeA  | DRN   | gene title                                                                           | DRN FDR  | same dir | PAG+ ACB | PAG+ CeA |
|-------------------|-------|----------|----------|--------------|--------------|------------|----------------|------|----------|-------|------|-------|--------------------------------------------------------------------------------------|----------|----------|----------|----------|
| <i>Mx1</i>        | 2.96  | 2.07E-06 | 6.80E-05 | 0.0          | 0.0          |            |                |      | 1        |       |      |       | myxovirus (influenza virus) resistance 1, interferon-inducible prote                 | 0.00E+00 | N        |          |          |
| <i>Rsph10b</i>    | 1.61  | 2.16E-06 | 7.08E-05 | 10.3         | 16.6         |            |                |      |          |       |      | 1.77  |                                                                                      | 2.27E-10 | Y        |          |          |
| <i>P2rx5</i>      | -2.08 | 2.19E-06 | 7.12E-05 | 3.1          | 1.5          |            |                |      |          |       |      |       | purinergic receptor P2X, ligand-gated ion channel, 5                                 | 1.61E-01 | N        |          |          |
| <i>Car7</i>       | 1.73  | 2.19E-06 | 7.12E-05 | 7.0          | 12.2         |            | 1              |      |          |       |      | 3.05  | carbonic anhydrase 7                                                                 | 3.06E-19 | Y        |          |          |
| <i>Dlgap1</i>     | 1.51  | 2.19E-06 | 7.12E-05 | 44.2         | 66.9         |            |                |      |          |       |      | 1.87  | discs, large (Drosophila) homolog-associated protein 1                               | 3.63E-15 | Y        |          |          |
| <i>Lrrc7</i>      | -1.55 | 2.20E-06 | 7.13E-05 | 17.4         | 11.2         | 1          | 1              |      |          |       |      | -1.41 | leucine rich repeat containing 7                                                     | 9.68E-05 | Y        |          |          |
| <i>Sc4mol</i>     | -1.52 | 2.24E-06 | 7.24E-05 | 120.6        | 79.5         | 1          | 1              |      | 1        |       |      | -1.49 |                                                                                      | 7.54E-07 | Y        |          |          |
| <i>Lin7a</i>      | 1.57  | 2.25E-06 | 7.25E-05 | 59.3         | 92.8         | 1          |                |      |          |       |      | 2.46  | lin-7 homolog A (C. elegans)                                                         | 1.26E-21 | Y        |          |          |
| <i>RGD1310641</i> | 1.67  | 2.26E-06 | 7.27E-05 | 7.0          | 11.7         |            |                |      |          |       |      | 2.29  |                                                                                      | 2.40E-18 | Y        |          |          |
| <i>Oxsm</i>       | -1.83 | 2.32E-06 | 7.44E-05 | 4.8          | 2.6          |            |                |      |          |       |      |       | 3-oxoacyl-ACP synthase, mitochondrial protein tyrosine phosphatase, receptor type, O | 8.83E-01 | N        |          |          |
| <i>Ptpro</i>      | -1.56 | 2.34E-06 | 7.48E-05 | 16.1         | 10.4         |            |                |      |          |       |      | -1.68 |                                                                                      | 1.35E-10 | Y        |          |          |
| <i>Nap1l3</i>     | -1.54 | 2.41E-06 | 7.69E-05 | 34.5         | 22.3         | 1          | 1              |      |          |       |      | -1.33 | nucleosome assembly protein 1-like 3                                                 | 1.14E-03 | Y        |          |          |
| <i>Fam70a</i>     | -1.52 | 2.42E-06 | 7.70E-05 | 76.6         | 50.4         |            |                |      |          |       |      | -1.85 | family with sequence similarity 70, member A                                         | 2.22E-15 | Y        |          |          |
| <i>Pid1</i>       | -1.71 | 2.47E-06 | 7.84E-05 | 25.9         | 15.1         |            |                |      |          |       |      |       | phosphotyrosine interaction domain containing 1                                      | 7.53E-01 | N        |          |          |
| <i>Nefl</i>       | -1.50 | 2.48E-06 | 7.85E-05 | 257.8        | 172.0        | 1          |                |      | 1        |       |      |       | neurofilament, light polypeptide                                                     | 5.10E-02 | N        |          |          |
| <i>Mal</i>        | -1.50 | 2.54E-06 | 8.02E-05 | 184.7        | 123.1        | 2          | 1              | 1    | 1        |       |      | -1.44 | mal, T-cell differentiation protein                                                  | 6.95E-06 | Y        |          |          |
| <i>Cd164</i>      | -1.51 | 2.59E-06 | 8.13E-05 | 77.1         | 51.0         |            | 1              |      |          |       |      | -1.25 | CD164 molecule, sialomucin                                                           | 1.22E-02 | Y        |          |          |
| <i>Rnf112</i>     | 1.50  | 2.59E-06 | 8.13E-05 | 89.8         | 135.1        |            | 1              |      |          |       |      | 1.39  | ring finger protein 112                                                              | 8.03E-05 | Y        |          |          |
| <i>Nat8l</i>      | -1.50 | 2.64E-06 | 8.27E-05 | 123.3        | 82.2         |            | 1              |      |          |       |      |       | N-acetyltransferase 8-like (GCN5-related, putative)                                  | 4.79E-01 | N        |          |          |
| <i>Cdh13</i>      | -1.52 | 2.68E-06 | 8.37E-05 | 43.2         | 28.4         |            | 1              | 2    |          |       |      | -1.61 | cadherin 13, H-cadherin (heart)                                                      | 1.84E-09 | Y        |          |          |
| <i>Lrrc56</i>     | 1.68  | 2.69E-06 | 8.38E-05 | 6.9          | 11.5         |            | 1              |      |          |       |      | 2.26  |                                                                                      | 2.11E-15 | Y        |          |          |
| <i>Amigo2</i>     | -1.63 | 2.71E-06 | 8.42E-05 | 11.0         | 6.8          |            | 1              |      |          |       |      | -1.65 | adhesion molecule with Ig-like domain 2                                              | 3.60E-09 | Y        |          |          |
| <i>Vstm2b</i>     | -1.67 | 2.73E-06 | 8.46E-05 | 12.9         | 7.8          |            | 1              |      |          |       |      | -1.56 | V-set and transmembrane domain containing 2B                                         | 7.30E-06 | Y        |          |          |
| <i>Krt8</i>       | 1.69  | 2.77E-06 | 8.57E-05 | 8.0          | 13.6         |            |                |      |          |       |      | 2.21  | keratin 8                                                                            | 4.46E-13 | Y        |          |          |
| <i>Acpl2</i>      | 1.58  | 2.84E-06 | 8.76E-05 | 11.5         | 18.1         |            | 1              |      |          |       |      | 1.41  | acid phosphatase-like 2                                                              | 4.85E-04 | Y        |          |          |
| <i>Plekhf1</i>    | 1.63  | 2.88E-06 | 8.86E-05 | 13.2         | 21.6         | 2          | 2              |      |          |       |      | -1.44 | pleckstrin homology domain containing, family F (with FYVE domai                     | 5.75E-07 | Y        |          | N        |
| <i>Hrh3</i>       | -1.65 | 2.89E-06 | 8.87E-05 | 10.7         | 6.5          | 1          | 1              |      |          |       | 1.17 | -1.41 | histamine receptor H3                                                                | 7.40E-04 | Y        |          | N        |
| <i>Cdh19</i>      | -1.80 | 3.30E-06 | 1.01E-04 | 5.7          | 3.2          |            |                |      | 1        |       |      | -1.67 | cadherin 19, type 2                                                                  | 8.23E-06 | Y        |          |          |
| <i>MGC94915</i>   | 1.58  | 3.31E-06 | 1.01E-04 | 12.2         | 19.2         |            |                |      |          |       |      | 1.82  |                                                                                      | 1.85E-11 | Y        |          |          |
| <i>Gng13</i>      | 1.70  | 3.37E-06 | 1.02E-04 | 33.2         | 56.6         |            |                |      |          |       |      | 1.62  | guanine nucleotide binding protein (G protein), gamma 13                             | 5.85E-05 | Y        |          |          |
| <i>Sv2c</i>       | -1.52 | 3.37E-06 | 1.02E-04 | 42.9         | 28.1         |            | 1              |      |          |       |      |       | synaptic vesicle glycoprotein 2C                                                     | 5.74E-01 | N        |          |          |
| <i>Spag8</i>      | 1.63  | 3.41E-06 | 1.03E-04 | 12.7         | 20.6         |            |                |      |          |       |      | 2.13  | sperm associated antigen 8                                                           | 6.05E-15 | Y        |          |          |
| <i>RGD1308626</i> | -1.55 | 3.43E-06 | 1.04E-04 | 34.7         | 22.4         |            |                |      |          |       |      | -1.38 |                                                                                      | 3.82E-04 | Y        |          |          |
| <i>Gnb3</i>       | 1.72  | 3.52E-06 | 1.06E-04 | 6.7          | 11.5         |            |                |      |          |       |      | 1.81  | guanine nucleotide binding protein (G protein), beta polypeptide 3                   | 2.67E-06 | Y        |          |          |
| <i>Kcnd1</i>      | -1.77 | 3.54E-06 | 1.06E-04 | 4.1          | 2.3          |            |                |      |          |       |      |       | potassium voltage-gated channel, Shal-related subfamily, member 1                    | 8.88E-01 | N        |          |          |
| <i>Sema5a</i>     | -1.50 | 3.63E-06 | 1.09E-04 | 30.3         | 20.3         |            | 1              | 1    |          |       |      | -1.62 | sema domain, seven thrombospondin repeats (type 1 and type 1-like),                  | 7.77E-10 | Y        |          |          |
| <i>A2m</i>        | 1.53  | 3.71E-06 | 1.11E-04 | 13.7         | 21.0         | 1          |                |      |          |       |      | 1.78  | alpha-2-macroglobulin                                                                | 6.73E-12 | Y        |          |          |

Supplementary Table 1

| gene              | FC    | Pvalue   | FDR      | control RPKM | alcohol RPKM | P drinking | P vs. NP naïve | GWAS | GE in PM | AcbSh | CeA | DRN   | gene title                                                                                     | DRN FDR  | same dir | PAG+ ACB | PAG+ CeA |
|-------------------|-------|----------|----------|--------------|--------------|------------|----------------|------|----------|-------|-----|-------|------------------------------------------------------------------------------------------------|----------|----------|----------|----------|
| <i>Enpp2</i>      | -1.49 | 3.71E-06 | 1.11E-04 | 120.5        | 80.7         |            |                |      | 2        |       |     | -1.24 | ectonucleotide pyrophosphatase/phosphodiesterase 2                                             | 1.50E-02 | Y        |          |          |
| <i>Cmip</i>       | -1.51 | 3.73E-06 | 1.11E-04 | 73.9         | 49.1         | 1          |                |      |          |       |     | -1.38 | c-Maf inducing protein                                                                         | 1.23E-04 | Y        |          |          |
| <i>Cntnap5a</i>   | -1.56 | 3.74E-06 | 1.11E-04 | 15.8         | 10.1         |            |                |      |          |       |     | -1.56 | contactin associated protein-like 5A; similar to contactin associated protein-like 5 isoform 1 | 2.82E-07 | Y        |          |          |
| <i>Fxyd1</i>      | 1.67  | 3.76E-06 | 1.11E-04 | 26.5         | 44.4         |            | 1              |      |          |       |     | 1.84  | FXYD domain containing ion transport regulator 1                                               | 1.30E-08 | Y        |          |          |
| <i>Chrm2</i>      | -1.59 | 3.76E-06 | 1.11E-04 | 16.6         | 10.4         |            |                |      |          |       |     | -1.41 | cholinergic receptor, muscarinic 2                                                             | 1.95E-04 | Y        |          |          |
| <i>Slc8a2</i>     | 1.50  | 3.81E-06 | 1.12E-04 | 60.2         | 90.2         | 1          |                |      |          |       |     | 2.04  | solute carrier family 8 (sodium/calcium exchanger), member 2                                   | 6.19E-19 | Y        |          |          |
| <i>Kcnh5</i>      | -1.54 | 3.86E-06 | 1.14E-04 | 20.9         | 13.5         |            |                |      |          |       |     | -1.40 | potassium voltage-gated channel, subfamily H (eag-related), member                             | 2.92E-04 | Y        |          |          |
| <i>Lrrc23</i>     | 1.54  | 3.96E-06 | 1.16E-04 | 30.7         | 47.3         | 1          | 2              |      |          |       |     | 1.82  | leucine rich repeat containing 23                                                              | 1.80E-11 | Y        |          |          |
| <i>RGD1309453</i> | 1.61  | 4.01E-06 | 1.17E-04 | 5.1          | 8.1          |            |                |      |          |       |     | 2.34  |                                                                                                | 2.50E-19 | Y        |          |          |
| <i>RGD1559747</i> | -1.58 | 4.02E-06 | 1.17E-04 | 14.2         | 9.0          |            |                |      |          |       |     | -1.28 |                                                                                                | 1.30E-02 | Y        |          |          |
| <i>Ipcef1</i>     | 1.65  | 4.03E-06 | 1.17E-04 | 10.0         | 16.5         |            |                |      |          |       |     | 2.19  | interaction protein for cytohesin exchange factors 1                                           | 4.43E-11 | Y        |          |          |
| <i>Tmem229a</i>   | -1.50 | 4.07E-06 | 1.18E-04 | 46.1         | 30.7         |            | 1              |      |          |       |     | -1.27 | transmembrane protein 229A                                                                     | 7.03E-03 | Y        |          |          |
| <i>Tsnaxip1</i>   | 1.73  | 4.19E-06 | 1.22E-04 | 3.8          | 6.6          |            |                |      |          |       |     | 2.21  | translin-associated factor X interacting protein 1                                             | 3.97E-13 | Y        |          |          |
| <i>Doc2a</i>      | -1.56 | 4.23E-06 | 1.22E-04 | 38.3         | 24.6         |            |                |      |          |       |     | -1.72 | double C2-like domains, alpha                                                                  | 3.28E-09 | Y        |          |          |
| <i>Npas1</i>      | -1.78 | 4.25E-06 | 1.22E-04 | 6.9          | 3.9          |            |                |      |          |       |     | -1.57 | neuronal PAS domain protein 1                                                                  | 1.54E-05 | Y        |          |          |
| <i>Slc12a4</i>    | 1.53  | 4.25E-06 | 1.22E-04 | 15.4         | 23.6         |            |                |      |          |       |     | 1.75  | solute carrier family 12 (potassium/chloride transporters), memb                               | 5.96E-11 | Y        |          |          |
| <i>Dab2ip</i>     | 1.49  | 4.30E-06 | 1.24E-04 | 48.2         | 71.7         |            |                |      |          |       |     | 1.62  | DAB2 interacting protein                                                                       | 1.27E-09 | Y        |          |          |
| <i>Zfp365</i>     | -1.54 | 4.34E-06 | 1.24E-04 | 27.7         | 18.0         | 2          | 1              |      |          |       |     | -1.24 |                                                                                                | 2.52E-02 | Y        |          |          |
| <i>Pdgfd</i>      | 1.95  | 4.35E-06 | 1.24E-04 | 6.5          | 12.7         |            |                |      |          |       |     | 1.72  | platelet derived growth factor D                                                               | 8.72E-05 | Y        |          |          |
| <i>Adamts18</i>   | 1.59  | 4.36E-06 | 1.24E-04 | 6.1          | 9.8          |            |                | 1    | 1        |       |     | 3.70  | ADAM metalloproteinase with thrombospondin type 1 motif, 18                                    | 2.28E-33 | Y        |          |          |
| <i>Nptx1</i>      | 1.48  | 4.37E-06 | 1.24E-04 | 113.6        | 168.5        |            | 1              |      |          |       |     | 2.48  | neuronal pentraxin I                                                                           | 3.16E-32 | Y        |          |          |
| <i>Dcc</i>        | -1.57 | 4.42E-06 | 1.25E-04 | 9.7          | 6.2          | 1          |                |      |          |       |     | 1.23  | deleted in colorectal carcinoma                                                                | 6.66E-04 | Y        | N        |          |
| <i>B3gnt5</i>     | 1.66  | 4.49E-06 | 1.27E-04 | 3.2          | 5.4          |            |                |      |          |       |     | 1.76  | UDP-GlcNAc:betaGal beta-1,3-N-acetylglucosaminyltransferase 5                                  | 1.08E-07 | Y        |          |          |
| <i>RGD1560028</i> | -1.96 | 4.51E-06 | 1.27E-04 | 2.6          | 1.3          |            |                |      |          |       |     |       |                                                                                                | 3.22E-01 | N        |          |          |
| <i>Ust</i>        | 1.63  | 4.72E-06 | 1.33E-04 | 10.3         | 16.8         |            |                | 1    | 1        |       |     | 2.06  | uronyl-2-sulfotransferase                                                                      | 1.80E-12 | Y        |          |          |
| <i>Chrna4</i>     | -1.56 | 4.73E-06 | 1.33E-04 | 25.9         | 16.6         |            |                |      |          |       |     | -1.48 | cholinergic receptor, nicotinic, alpha 4 (neuronal)                                            | 9.18E-06 | Y        |          |          |
| <i>Usp14</i>      | -1.49 | 4.78E-06 | 1.34E-04 | 138.9        | 93.2         |            |                |      |          |       |     | -1.44 | ubiquitin specific peptidase 14 (tRNA-guanine transglycosylase) //                             | 6.53E-06 | Y        |          |          |
| <i>Ccdc19</i>     | 1.72  | 4.80E-06 | 1.34E-04 | 5.8          | 10.0         |            |                |      |          |       |     | 2.09  | coiled-coil domain containing 19                                                               | 5.85E-12 | Y        |          |          |
| <i>Ly6g6e</i>     | 1.63  | 5.02E-06 | 1.40E-04 | 18.0         | 29.2         |            |                |      |          |       |     | 2.79  |                                                                                                | 6.11E-19 | Y        |          |          |
| <i>Lhx1</i>       | 1.63  | 5.04E-06 | 1.40E-04 | 8.4          | 13.7         |            |                |      |          |       |     | 2.95  | LIM homeobox 1                                                                                 | 3.05E-23 | Y        |          |          |
| <i>Samd5</i>      | -1.62 | 5.25E-06 | 1.46E-04 | 11.9         | 7.3          |            |                |      |          |       |     | -1.44 | sterile alpha motif domain containing 5                                                        | 1.50E-04 | Y        |          |          |
| <i>Mal2</i>       | -1.52 | 5.28E-06 | 1.46E-04 | 36.5         | 24.1         |            |                |      |          |       |     | -1.84 | mal, T-cell differentiation protein 2 (gene/pseudogene)                                        | 4.92E-15 | Y        |          |          |
| <i>Bcat1</i>      | -1.47 | 5.37E-06 | 1.49E-04 | 806.0        | 547.8        |            |                |      |          |       |     | -1.47 | branched chain amino-acid transaminase 1, cytosolic                                            | 7.09E-07 | Y        |          |          |
| <i>Dleu7</i>      | -1.71 | 5.48E-06 | 1.51E-04 | 10.4         | 6.1          |            |                |      |          |       |     | -1.94 | deleted in lymphocytic leukemia, 7                                                             | 6.04E-12 | Y        |          |          |
| <i>Hopx</i>       | 1.72  | 5.49E-06 | 1.51E-04 | 9.4          | 16.2         |            | 1              |      |          |       |     | 1.75  | HOP homeobox                                                                                   | 6.04E-06 | Y        |          |          |

Supplementary Table 1

| gene              | FC    | Pvalue   | FDR      | control RPKM | alcohol RPKM | P drinking | P vs. NP naïve | GWAS | GE in PM | AcbSh | CeA   | DRN   | gene title                                                          | DRN FDR  | same dir | PAG+ ACB | PAG+ CeA |
|-------------------|-------|----------|----------|--------------|--------------|------------|----------------|------|----------|-------|-------|-------|---------------------------------------------------------------------|----------|----------|----------|----------|
| <i>Cdh15</i>      | 1.58  | 5.53E-06 | 1.52E-04 | 9.6          | 15.1         |            |                |      |          |       |       | 2.54  | cadherin 15, type 1, M-cadherin (myotubule)                         | 7.51E-20 | Y        |          |          |
| <i>Ccdc40</i>     | 1.55  | 5.55E-06 | 1.52E-04 | 7.8          | 12.1         |            |                |      |          |       |       | 2.08  | coiled-coil domain containing 40                                    | 4.94E-17 | Y        |          |          |
| <i>Pde8a</i>      | -1.63 | 5.59E-06 | 1.53E-04 | 10.8         | 6.6          |            |                |      | 1        |       |       | -1.60 | phosphodiesterase 8A                                                | 1.89E-06 | Y        |          |          |
| <i>Slc7a3</i>     | -1.55 | 5.60E-06 | 1.53E-04 | 27.4         | 17.7         |            | 1              |      |          |       |       | -1.64 | solute carrier family 7 (cationic amino acid transporter, y+ syst   | 1.21E-08 | Y        |          |          |
| <i>Adam11</i>     | 1.49  | 5.61E-06 | 1.53E-04 | 59.7         | 89.0         |            | 1              |      |          |       |       | 1.66  | ADAM metalloproteinase domain 11                                    | 3.36E-10 | Y        |          |          |
| <i>Odz4</i>       | -1.49 | 5.68E-06 | 1.54E-04 | 23.2         | 15.5         |            |                |      |          |       |       |       | odz, odd Oz/ten-m homolog 4 (Drosophila)                            | 6.33E-01 | N        |          |          |
| <i>RGD1563714</i> | 1.94  | 5.92E-06 | 1.60E-04 | 2.4          | 4.6          |            |                |      |          |       |       | 2.14  |                                                                     | 1.67E-08 | Y        |          |          |
| <i>Suox</i>       | 1.58  | 5.92E-06 | 1.60E-04 | 11.2         | 17.7         |            | 1              |      |          |       |       |       | sulfite oxidase                                                     | 7.77E-01 | N        |          |          |
| <i>Nyx</i>        | 1.77  | 6.13E-06 | 1.66E-04 | 3.6          | 6.3          |            |                |      |          |       |       | 2.20  | nyctalopin                                                          | 4.14E-08 | Y        |          |          |
| <i>Calml4</i>     | 2.04  | 6.15E-06 | 1.66E-04 | 3.8          | 7.7          |            |                |      |          |       |       | 2.51  | calmodulin-like 4                                                   | 6.36E-11 | Y        |          |          |
| <i>Ndst3</i>      | 1.49  | 6.37E-06 | 1.71E-04 | 50.2         | 74.7         |            |                |      |          |       |       | 2.91  | N-deacetylase/N-sulfotransferase (heparan glucosaminyl) 3           | 1.13E-39 | Y        |          |          |
| <i>Timp2</i>      | -1.48 | 6.38E-06 | 1.71E-04 | 195.0        | 131.8        | 1          |                |      | 3        |       |       | -1.43 | TIMP metalloproteinase inhibitor 2                                  | 8.17E-06 | Y        |          |          |
| <i>Enpp6</i>      | -1.76 | 6.45E-06 | 1.73E-04 | 7.8          | 4.4          |            |                | 2    |          |       |       | -1.41 | ectonucleotide pyrophosphatase/phosphodiesterase 6                  | 4.86E-03 | Y        |          |          |
| <i>RGD1304810</i> | 1.51  | 6.49E-06 | 1.73E-04 | 26.9         | 40.7         |            |                |      |          |       |       | 2.51  |                                                                     | 8.06E-27 | Y        |          |          |
| <i>Ier2</i>       | 1.76  | 6.54E-06 | 1.74E-04 | 5.3          | 9.3          | 4          | 1              |      |          | 1.70  | 1.26  | 2.92  | immediate early response 2                                          | 9.21E-18 | Y        | Y        | Y        |
| <i>Cep76</i>      | 1.50  | 6.59E-06 | 1.75E-04 | 31.5         | 47.3         |            |                |      |          |       |       | 2.65  | centrosomal protein 76kDa                                           | 8.02E-33 | Y        |          |          |
| <i>Cacna1g</i>    | 1.48  | 6.89E-06 | 1.83E-04 | 35.7         | 52.8         |            |                |      |          |       |       | 1.76  | calcium channel, voltage-dependent, T type, alpha 1G subunit        | 6.24E-13 | Y        |          |          |
| <i>Kcnk12</i>     | 1.64  | 6.93E-06 | 1.83E-04 | 7.4          | 12.2         |            |                |      |          |       |       | 3.06  | potassium channel, subfamily K, member 12                           | 2.47E-18 | Y        |          |          |
| <i>Khh14</i>      | -1.83 | 6.95E-06 | 1.84E-04 | 2.7          | 1.5          |            |                |      |          |       |       | -1.71 | kelch-like 14 (Drosophila)                                          | 2.25E-04 | Y        |          |          |
| <i>Oprk1</i>      | -1.77 | 7.41E-06 | 1.95E-04 | 9.6          | 5.4          | 2          | 1              |      |          |       |       | -1.38 | opioid receptor, kappa 1                                            | 1.33E-02 | Y        |          |          |
| <i>Til9</i>       | 1.60  | 7.59E-06 | 1.99E-04 | 11.4         | 18.2         |            |                |      |          |       |       | 1.77  | tubulin tyrosine ligase-like family, member 9                       | 3.03E-09 | Y        |          |          |
| <i>Scn3b</i>      | -1.48 | 7.59E-06 | 1.99E-04 | 63.7         | 43.1         |            | 3              |      |          |       |       | -1.63 | sodium channel, voltage-gated, type III, beta subunit               | 3.19E-10 | Y        |          |          |
| <i>Zic3</i>       | 2.08  | 7.69E-06 | 2.01E-04 | 1.4          | 2.9          |            | 2              |      |          |       |       | 3.16  | Zic family member 3                                                 | 2.11E-09 | Y        |          |          |
| <i>RGD1565512</i> | 1.58  | 7.78E-06 | 2.03E-04 | 7.5          | 11.9         |            |                |      |          |       |       | 2.13  |                                                                     | 3.88E-16 | Y        |          |          |
| <i>Fbxo23</i>     | -1.63 | 7.86E-06 | 2.05E-04 | 15.5         | 9.5          |            | 1              |      |          |       |       | -1.50 |                                                                     | 1.72E-05 | Y        |          |          |
| <i>Syt17</i>      | -1.58 | 7.89E-06 | 2.05E-04 | 13.8         | 8.8          |            | 1              |      |          |       |       | -1.35 | synaptotagmin XVII                                                  | 1.22E-03 | Y        |          |          |
| <i>Olig1</i>      | -1.50 | 8.05E-06 | 2.09E-04 | 55.0         | 36.7         | 2          |                |      |          |       |       | -1.30 | oligodendrocyte transcription factor 1                              | 3.54E-03 | Y        |          |          |
| <i>Pygl</i>       | -1.88 | 8.26E-06 | 2.14E-04 | 3.4          | 1.8          |            | 3              |      |          |       |       |       | phosphorylase, glycogen, liver                                      | 2.15E-01 | N        |          |          |
| <i>Lhfp</i>       | 1.49  | 8.27E-06 | 2.14E-04 | 49.1         | 73.1         | 1          | 1              |      |          |       | -1.16 | 1.84  | lipoma HMGIC fusion partner                                         | 7.80E-14 | Y        |          | N        |
| <i>Plekhh3</i>    | 1.59  | 8.35E-06 | 2.15E-04 | 6.7          | 10.6         |            |                |      |          |       |       | 1.97  | pleckstrin homology domain containing, family H (with MyTH4 doma    | 3.48E-10 | Y        |          |          |
| <i>Fank1</i>      | 1.83  | 8.42E-06 | 2.17E-04 | 4.4          | 8.1          |            |                | 1    |          |       |       | 1.97  | fibronectin type III and ankyrin repeat domains 1                   | 7.82E-08 | Y        |          |          |
| <i>RGD1308226</i> | 1.63  | 8.46E-06 | 2.17E-04 | 5.0          | 8.1          |            |                |      |          |       |       | 1.88  |                                                                     | 5.47E-11 | Y        |          |          |
| <i>Slc9a3</i>     | 1.62  | 8.64E-06 | 2.21E-04 | 2.9          | 4.7          | 1          |                |      |          |       |       | 3.80  | solute carrier family 9, subfamily A (NHE3, cation proton antiporte | 2.22E-28 | Y        |          |          |
| <i>Ptpn5</i>      | -1.49 | 8.78E-06 | 2.25E-04 | 44.9         | 30.1         | 1          | 1              |      |          |       |       | -1.32 | protein tyrosine phosphatase, non-receptor type 5 (striatum-enrich  | 1.55E-03 | Y        |          |          |
| <i>Dpyd</i>       | -1.61 | 9.04E-06 | 2.30E-04 | 6.8          | 4.2          |            | 2              |      | 1        |       |       | -1.41 | dihydropyrimidine dehydrogenase                                     | 5.72E-04 | Y        |          |          |
| <i>Camkk1</i>     | -1.48 | 9.04E-06 | 2.30E-04 | 48.5         | 32.7         |            |                |      |          |       |       | -1.47 | calcium/calmodulin-dependent protein kinase kinase 1, alpha         | 4.10E-06 | Y        |          |          |

Supplementary Table 1

| gene              | FC    | Pvalue   | FDR      | control RPKM | alcohol RPKM | P drinking | P vs. NP naïve | GWAS | GE in PM | AcbSh | CeA  | DRN   | gene title                                                         | DRN FDR  | same dir | PAG+ ACB | PAG+ CeA |
|-------------------|-------|----------|----------|--------------|--------------|------------|----------------|------|----------|-------|------|-------|--------------------------------------------------------------------|----------|----------|----------|----------|
| <i>RGD1561849</i> | -1.52 | 9.15E-06 | 2.33E-04 | 20.9         | 13.8         |            |                |      |          |       |      | -1.28 |                                                                    | 6.38E-03 | Y        |          |          |
| <i>Htr2a</i>      | -1.86 | 9.27E-06 | 2.35E-04 | 6.2          | 3.3          | 1          | 1              |      |          |       |      | -1.40 | 5-hydroxytryptamine (serotonin) receptor 2A, G protein-coupled     | 5.20E-03 | Y        |          |          |
| <i>Usp43</i>      | 1.57  | 9.29E-06 | 2.35E-04 | 1.3          | 2.1          |            |                | 1    |          |       |      | 2.16  | ubiquitin specific peptidase 43                                    | 1.59E-03 | Y        |          |          |
| <i>Ccdc114</i>    | 1.58  | 9.31E-06 | 2.35E-04 | 8.2          | 13.0         |            |                |      |          |       |      | 2.07  | coiled-coil domain containing 114                                  | 5.51E-15 | Y        |          |          |
| <i>Zfp219</i>     | 1.51  | 9.37E-06 | 2.36E-04 | 18.5         | 28.0         |            |                |      |          |       |      | 1.58  |                                                                    | 2.33E-07 | Y        |          |          |
| <i>Kif15</i>      | 2.49  | 9.53E-06 | 2.39E-04 | 0.4          | 0.9          | 2          | 2              |      |          | 1.39  | 1.45 | 1.63  | kinesin family member 15                                           | 2.68E-02 | Y        | Y        | Y        |
| <i>Wfdc1</i>      | 1.56  | 9.53E-06 | 2.39E-04 | 24.5         | 38.3         | 1          |                | 1    |          |       |      | 1.83  | WAP four-disulfide core domain 1                                   | 1.55E-10 | Y        |          |          |
| <i>Pou3f3</i>     | -1.52 | 9.57E-06 | 2.40E-04 | 24.8         | 16.3         |            |                |      |          |       |      | -1.34 | POU class 3 homeobox 3                                             | 1.40E-03 | Y        |          |          |
| <i>Col6a2</i>     | 1.65  | 9.66E-06 | 2.41E-04 | 3.5          | 5.8          |            |                |      |          |       |      | 1.48  | collagen, type VI, alpha 2                                         | 3.69E-04 | Y        |          |          |
| <i>Dok6</i>       | -1.54 | 9.81E-06 | 2.45E-04 | 36.0         | 23.4         |            |                |      |          |       |      | -1.35 | docking protein 6                                                  | 1.01E-03 | Y        |          |          |
| <i>Spata18</i>    | 1.54  | 9.92E-06 | 2.47E-04 | 16.4         | 25.2         |            |                |      |          |       |      | 2.13  | spermatogenesis associated 18                                      | 2.35E-17 | Y        |          |          |
| <i>Ptpn22</i>     | 1.89  | 9.93E-06 | 2.47E-04 | 1.7          | 3.1          |            |                |      |          |       |      | 3.62  | protein tyrosine phosphatase, non-receptor type 22 (lymphoid)      | 3.00E-11 | Y        |          |          |
| <i>Ap1s2</i>      | -1.50 | 1.04E-05 | 2.57E-04 | 58.0         | 38.8         |            |                |      |          |       |      | -1.41 | adaptor-related protein complex 1, sigma 2 subunit                 | 4.57E-05 | Y        |          |          |
| <i>Scoc</i>       | -1.47 | 1.04E-05 | 2.57E-04 | 164.1        | 111.7        |            |                |      |          |       |      | -1.36 | short coiled-coil protein                                          | 1.57E-04 | Y        |          |          |
| <i>Pde1b</i>      | -1.48 | 1.05E-05 | 2.59E-04 | 75.1         | 50.6         |            |                |      |          |       |      | -1.23 | phosphodiesterase 1B, calmodulin-dependent                         | 2.45E-02 | Y        |          |          |
| <i>LOC499980</i>  | 1.62  | 1.06E-05 | 2.61E-04 | 5.1          | 8.3          |            |                |      |          |       |      | 1.96  |                                                                    | 4.73E-12 | Y        |          |          |
| <i>Pltp</i>       | 1.47  | 1.06E-05 | 2.61E-04 | 73.0         | 107.7        |            |                |      |          |       |      | 1.71  | phospholipid transfer protein                                      | 1.51E-11 | Y        |          |          |
| <i>Adcy7</i>      | -1.54 | 1.07E-05 | 2.63E-04 | 12.6         | 8.2          |            |                |      | 1        |       |      | -1.70 | adenylate cyclase 7                                                | 5.19E-10 | Y        |          |          |
| <i>LOC681766</i>  | 2.37  | 1.08E-05 | 2.65E-04 | 2.9          | 6.9          |            |                |      |          |       |      | 1.90  |                                                                    | 2.44E-03 | Y        |          |          |
| <i>Tekt4</i>      | 1.68  | 1.09E-05 | 2.66E-04 | 6.6          | 11.0         | 1          |                |      |          |       |      | 2.02  | tektin 4                                                           | 7.29E-11 | Y        |          |          |
| <i>Pik3c2g</i>    | 1.57  | 1.13E-05 | 2.76E-04 | 3.8          | 5.9          |            |                |      |          |       |      | 1.78  | phosphoinositide-3-kinase, class 2, gamma polypeptide              | 2.12E-07 | Y        |          |          |
| <i>Dcun1d4</i>    | -1.47 | 1.16E-05 | 2.82E-04 | 57.7         | 39.3         |            | 3              |      |          |       |      | -1.32 | DCN1, defective in cullin neddylation 1, domain containing 4 (S.   | 9.91E-04 | Y        |          |          |
| <i>Il22ra2</i>    | -1.76 | 1.17E-05 | 2.84E-04 | 5.0          | 2.8          |            | 2              |      |          |       |      | -1.34 | interleukin 22 receptor, alpha 2                                   | 1.97E-02 | Y        |          |          |
| <i>Cdon</i>       | 1.48  | 1.18E-05 | 2.86E-04 | 22.3         | 32.9         |            |                |      | 1        |       |      | 2.22  | Cdon homolog (mouse)                                               | 3.75E-22 | Y        |          |          |
| <i>Stac2</i>      | -1.58 | 1.23E-05 | 2.98E-04 | 11.2         | 7.1          |            |                |      |          |       |      |       | SH3 and cysteine rich domain 2                                     | 7.40E-01 | N        |          |          |
| <i>Wnt16</i>      | 1.99  | 1.24E-05 | 2.99E-04 | 2.0          | 4.0          |            |                |      |          |       |      | 2.33  | wingless-type MMTV integration site family, member 16              | 9.47E-05 | Y        |          |          |
| <i>Brpf1</i>      | 1.48  | 1.25E-05 | 3.01E-04 | 23.0         | 34.0         |            |                |      |          |       |      | 1.78  | bromodomain and PHD finger containing, 1                           | 2.28E-12 | Y        |          |          |
| <i>Slc13a4</i>    | 1.62  | 1.26E-05 | 3.03E-04 | 7.0          | 11.4         |            |                |      |          |       |      | 2.27  | solute carrier family 13 (sodium/sulfate symporters), member 4 /   | 6.17E-17 | Y        |          |          |
| <i>Arl4d</i>      | 1.87  | 1.28E-05 | 3.07E-04 | 3.3          | 6.3          |            | 1              |      |          |       |      | 1.58  | ADP-ribosylation factor-like 4D                                    | 5.08E-03 | Y        |          |          |
| <i>Eno4</i>       | 1.65  | 1.28E-05 | 3.07E-04 | 4.9          | 8.1          |            |                |      |          |       |      | 1.63  | enolase family member 4                                            | 3.95E-06 | Y        |          |          |
| <i>Pdyn</i>       | -1.64 | 1.29E-05 | 3.08E-04 | 8.4          | 5.1          |            | 1              |      | 1        |       |      | -1.54 | prodynorphin                                                       | 2.98E-04 | Y        |          |          |
| <i>Zic5</i>       | 1.62  | 1.29E-05 | 3.08E-04 | 6.9          | 11.1         |            |                |      |          |       |      | 3.19  | Zic family member 5                                                | 9.67E-23 | Y        |          |          |
| <i>Spata2</i>     | 1.49  | 1.34E-05 | 3.19E-04 | 26.5         | 39.5         |            |                |      |          |       |      | 1.52  | spermatogenesis associated 2                                       | 1.82E-06 | Y        |          |          |
| <i>Adhfe1</i>     | -1.54 | 1.35E-05 | 3.20E-04 | 23.9         | 15.5         |            |                |      | 1        |       |      | -1.42 | alcohol dehydrogenase, iron containing, 1                          | 1.47E-04 | Y        |          |          |
| <i>Kcnh7</i>      | -1.51 | 1.35E-05 | 3.20E-04 | 19.4         | 12.9         |            |                |      |          |       |      |       | potassium voltage-gated channel, subfamily H (eag-related), member | 6.20E-01 | N        |          |          |
| <i>Cnksr2</i>     | 1.46  | 1.36E-05 | 3.22E-04 | 37.9         | 55.5         |            | 1              |      | 1        |       |      | 2.04  | connector enhancer of kinase suppressor of Ras 2                   | 2.94E-19 | Y        |          |          |
| <i>Stk17b</i>     | 1.54  | 1.39E-05 | 3.28E-04 | 12.5         | 19.2         |            |                |      |          |       |      | 1.92  | serine/threonine kinase 17b                                        | 7.55E-12 | Y        |          |          |
| <i>Slit2</i>      | -1.52 | 1.39E-05 | 3.28E-04 | 8.5          | 5.6          |            | 2              |      | 2        |       |      | -1.35 | slit homolog 2 (Drosophila)                                        | 4.43E-04 | Y        |          |          |

Supplementary Table 1

| gene                | FC    | Pvalue   | FDR      | control RPKM | alcohol RPKM | P drinking | P vs. NP naïve | GWAS | GE in PM | AcbSh | CeA | DRN   | gene title                                                           | DRN FDR  | same dir | PAG+ ACB | PAG+ CeA |
|---------------------|-------|----------|----------|--------------|--------------|------------|----------------|------|----------|-------|-----|-------|----------------------------------------------------------------------|----------|----------|----------|----------|
| <i>Tmeff1</i>       | -1.50 | 1.44E-05 | 3.39E-04 | 32.8         | 21.9         | 1          |                |      | 1        |       |     | -1.73 | transmembrane protein with EGF-like and two follistatin-like doma    | 2.11E-11 | Y        |          |          |
| <i>Xrcc1</i>        | 1.51  | 1.48E-05 | 3.47E-04 | 19.6         | 29.6         |            |                |      |          |       |     | 1.41  | X-ray repair complementing defective repair in Chinese hamster cells | 3.14E-04 | Y        |          |          |
| <i>Wbscr17</i>      | 1.48  | 1.48E-05 | 3.47E-04 | 43.9         | 65.1         |            |                |      |          |       |     | 1.46  | Williams-Beuren syndrome chromosome region 17                        | 1.57E-05 | Y        |          |          |
| <i>Shank3</i>       | 1.46  | 1.49E-05 | 3.49E-04 | 30.8         | 44.9         |            | 1              |      |          |       |     | 1.82  | SH3 and multiple ankyrin repeat domains 3                            | 4.34E-14 | Y        |          |          |
| <i>Hmgcs1</i>       | -1.45 | 1.51E-05 | 3.53E-04 | 154.6        | 106.6        | 1          |                |      |          |       |     | -1.54 | 3-hydroxy-3-methylglutaryl-CoA synthase 1 (soluble)                  | 3.95E-08 | Y        |          |          |
| <i>LOC100158225</i> | 1.79  | 1.52E-05 | 3.54E-04 | 2.9          | 5.2          |            |                |      |          |       |     | 1.83  |                                                                      | 2.90E-05 | Y        |          |          |
| <i>Dcx</i>          | -1.49 | 1.58E-05 | 3.68E-04 | 9.4          | 6.3          | 1          | 1              |      |          |       |     | -1.50 | doublecortin                                                         | 1.21E-06 | Y        |          |          |
| <i>LOC654482</i>    | 1.61  | 1.63E-05 | 3.79E-04 | 11.2         | 18.0         |            |                |      |          |       |     | 1.64  |                                                                      | 8.07E-07 | Y        |          |          |
| <i>Mras</i>         | -1.47 | 1.64E-05 | 3.80E-04 | 46.5         | 31.7         |            | 2              |      |          |       |     | -1.31 | muscle RAS oncogene homolog                                          | 1.97E-03 | Y        |          |          |
| <i>T</i>            | 2.14  | 1.65E-05 | 3.82E-04 | 1.2          | 2.6          |            |                |      |          |       |     | 1.85  | T, brachyury homolog (mouse)                                         | 7.32E-04 | Y        |          |          |
| <i>Acat3</i>        | -1.53 | 1.68E-05 | 3.88E-04 | 22.9         | 15.0         |            |                |      |          |       |     | -1.44 |                                                                      | 3.84E-05 | Y        |          |          |
| <i>Slc7a8</i>       | 1.48  | 1.71E-05 | 3.94E-04 | 17.4         | 25.7         |            |                |      |          |       |     |       | solute carrier family 7 (amino acid transporter light chain, L sy    | 4.67E-01 | N        |          |          |
| <i>Gpd1</i>         | -1.45 | 1.72E-05 | 3.96E-04 | 94.1         | 64.7         | 4          | 2              |      |          |       |     | -1.22 | glycerol-3-phosphate dehydrogenase 1 (soluble)                       | 2.64E-02 | Y        |          |          |
| <i>Vkorc111</i>     | -1.57 | 1.74E-05 | 3.99E-04 | 30.8         | 19.7         | 1          |                |      |          |       |     | -1.37 | vitamin K epoxide reductase complex, subunit 1-like 1                | 9.00E-04 | Y        |          |          |
| <i>Pcdh7</i>        | -1.46 | 1.74E-05 | 3.99E-04 | 43.9         | 30.0         |            |                |      |          |       |     | -1.37 | protocadherin 7                                                      | 2.30E-04 | Y        |          |          |
| <i>Cpne4</i>        | -1.64 | 1.75E-05 | 4.00E-04 | 4.7          | 2.9          |            |                |      |          |       |     | -1.55 | copine IV                                                            | 7.23E-06 | Y        |          |          |
| <i>Pnma3</i>        | -1.50 | 1.75E-05 | 4.00E-04 | 24.4         | 16.3         |            |                |      |          |       |     | -1.63 | paraneoplastic Ma antigen 3                                          | 4.56E-09 | Y        |          |          |
| <i>Ppm1j</i>        | 1.80  | 1.82E-05 | 4.15E-04 | 3.2          | 5.8          |            |                |      |          |       |     | 2.14  | protein phosphatase, Mg2+/Mn2+ dependent, 1J                         | 3.77E-07 | Y        |          |          |
| <i>Eif5a2</i>       | -1.46 | 1.84E-05 | 4.19E-04 | 44.2         | 30.3         |            | 1              |      |          |       |     | -1.26 | eukaryotic translation initiation factor 5A2                         | 6.82E-03 | Y        |          |          |
| <i>Per1</i>         | 1.46  | 1.86E-05 | 4.22E-04 | 39.4         | 57.4         |            | 2              |      |          |       |     | 1.51  | period homolog 1 (Drosophila)                                        | 4.99E-07 | Y        |          |          |
| <i>Rgs17</i>        | -1.47 | 1.88E-05 | 4.25E-04 | 51.6         | 35.2         |            | 3              |      |          |       |     | -1.62 | regulator of G-protein signaling 17                                  | 3.58E-09 | Y        |          |          |
| <i>Cx3cl1</i>       | -1.46 | 1.88E-05 | 4.25E-04 | 71.2         | 48.9         |            | 1              |      |          |       |     | -1.33 | chemokine (C-X3-C motif) ligand 1                                    | 8.26E-04 | Y        |          |          |
| <i>Wnk3</i>         | -1.50 | 1.91E-05 | 4.31E-04 | 13.7         | 9.2          |            |                |      |          |       |     | -1.48 | WNK lysine deficient protein kinase 3                                | 4.41E-06 | Y        |          |          |
| <i>Mns1</i>         | 1.60  | 1.97E-05 | 4.44E-04 | 8.1          | 13.0         |            |                |      |          |       |     | 1.96  | meiosis-specific nuclear structural 1                                | 4.25E-12 | Y        |          |          |
| <i>Mag</i>          | -1.44 | 2.03E-05 | 4.57E-04 | 169.9        | 117.7        | 1          | 1              | 1    |          |       |     | -1.35 | myelin associated glycoprotein                                       | 3.14E-04 | Y        |          |          |
| <i>Olfm2</i>        | -1.48 | 2.09E-05 | 4.68E-04 | 45.4         | 30.7         |            |                |      |          |       |     | -1.59 | olfactomedin 2                                                       | 1.53E-08 | Y        |          |          |
| <i>Camk4</i>        | 1.46  | 2.09E-05 | 4.68E-04 | 74.6         | 108.8        | 2          | 1              |      |          |       |     | 3.00  | calcium/calmodulin-dependent protein kinase IV                       | 2.66E-41 | Y        |          |          |
| <i>Hmgcr</i>        | -1.47 | 2.14E-05 | 4.79E-04 | 28.2         | 19.2         | 2          | 1              |      | 2        |       |     | -1.21 | 3-hydroxy-3-methylglutaryl-CoA reductase                             | 3.75E-02 | Y        |          |          |
| <i>Cerk</i>         | 1.45  | 2.21E-05 | 4.93E-04 | 39.4         | 57.2         |            | 2              |      |          |       |     | 2.20  | ceramide kinase                                                      | 3.14E-23 | Y        |          |          |
| <i>Arnt2</i>        | -1.45 | 2.22E-05 | 4.95E-04 | 48.7         | 33.7         |            |                |      |          |       |     | -1.30 | aryl-hydrocarbon receptor nuclear translocator 2                     | 2.15E-03 | Y        |          |          |
| <i>Hspa2</i>        | 1.58  | 2.23E-05 | 4.96E-04 | 6.7          | 10.6         |            |                |      | 1        |       |     |       | heat shock 70kDa protein 2                                           | 9.35E-02 | N        |          |          |
| <i>Phka2</i>        | 1.54  | 2.25E-05 | 5.00E-04 | 6.5          | 10.0         |            |                |      |          |       |     | 1.59  | phosphorylase kinase, alpha 2 (liver)                                | 1.18E-06 | Y        |          |          |
| <i>Rin1</i>         | 1.72  | 2.29E-05 | 5.07E-04 | 2.9          | 4.9          |            |                |      | 1        |       |     | 2.17  | Ras and Rab interactor 1                                             | 2.95E-09 | Y        |          |          |
| <i>Pnma2</i>        | -1.46 | 2.29E-05 | 5.07E-04 | 39.4         | 26.9         |            |                |      |          |       |     | -1.65 | paraneoplastic Ma antigen 2                                          | 4.60E-10 | Y        |          |          |
| <i>Akt2</i>         | 1.47  | 2.34E-05 | 5.17E-04 | 34.4         | 50.6         |            |                |      |          |       |     | 1.75  | v-akt murine thymoma viral oncogene homolog 2                        | 4.48E-11 | Y        |          |          |
| <i>Sstr3</i>        | 1.51  | 2.37E-05 | 5.22E-04 | 8.8          | 13.2         |            |                |      |          |       |     | 3.18  | somatostatin receptor 3                                              | 1.96E-30 | Y        |          |          |
| <i>Plxdc1</i>       | 1.54  | 2.42E-05 | 5.32E-04 | 7.9          | 12.2         |            |                |      | 1        |       |     | 2.22  | plexin domain containing 1                                           | 8.00E-16 | Y        |          |          |

Supplementary Table 1

| gene              | FC    | Pvalue   | FDR      | control RPKM | alcohol RPKM | P drinking | P vs. NP naïve | GWAS | GE in PM | AcbSh | CeA | DRN   | gene title                                                       | DRN FDR  | same dir | PAG+ ACB | PAG+ CeA |
|-------------------|-------|----------|----------|--------------|--------------|------------|----------------|------|----------|-------|-----|-------|------------------------------------------------------------------|----------|----------|----------|----------|
| <i>Tpd52l1</i>    | 1.50  | 2.45E-05 | 5.38E-04 | 28.2         | 42.5         |            | 1              | 1    |          |       |     | 1.38  | tumor protein D52-like 1                                         | 1.06E-03 | Y        |          |          |
| <i>Cadm3</i>      | 1.44  | 2.52E-05 | 5.52E-04 | 212.8        | 306.7        |            |                |      |          |       |     | 1.25  | cell adhesion molecule 3                                         | 1.22E-02 | Y        |          |          |
| <i>Cryab</i>      | -1.50 | 2.54E-05 | 5.56E-04 | 88.5         | 59.1         |            | 2              |      | 3        |       |     |       | crystallin, alpha B                                              | 2.44E-01 | N        |          |          |
| <i>Bmp6</i>       | 1.58  | 2.66E-05 | 5.81E-04 | 11.6         | 18.3         |            |                |      |          |       |     | 2.21  | bone morphogenetic protein 6                                     | 1.53E-15 | Y        |          |          |
| <i>Ugt1a5</i>     | -1.80 | 2.70E-05 | 5.89E-04 | 4.1          | 2.3          |            |                |      |          |       |     |       |                                                                  | 4.50E-01 | N        |          |          |
| <i>RGD1310371</i> | 1.60  | 2.75E-05 | 5.99E-04 | 9.8          | 15.6         |            |                |      |          |       |     | 2.12  |                                                                  | 5.36E-14 | Y        |          |          |
| <i>Wisp1</i>      | 2.91  | 2.81E-05 | 6.09E-04 | 0.4          | 1.3          |            |                |      |          |       |     |       | WNT1 inducible signaling pathway protein 1                       | 0.00E+00 | N        |          |          |
| <i>Rimbp2</i>     | -1.47 | 2.81E-05 | 6.09E-04 | 13.3         | 9.0          |            |                |      |          |       |     | -1.71 | RIMS binding protein 2                                           | 1.16E-11 | Y        |          |          |
| <i>Aurkb</i>      | 1.74  | 2.86E-05 | 6.19E-04 | 3.6          | 6.2          |            |                |      |          |       |     | 1.73  | aurora kinase B                                                  | 1.41E-05 | Y        |          |          |
| <i>Pip5k1c</i>    | 1.44  | 2.88E-05 | 6.22E-04 | 58.2         | 83.7         |            |                |      |          |       |     | 1.38  | phosphatidylinositol-4-phosphate 5-kinase, type I, gamma         | 1.01E-04 | Y        |          |          |
| <i>Ugt1a3</i>     | -1.81 | 2.96E-05 | 6.39E-04 | 4.0          | 2.2          |            |                |      |          |       |     |       |                                                                  | 4.94E-01 | N        |          |          |
| <i>Mep1a</i>      | 3.09  | 3.00E-05 | 6.46E-04 | 0.2          | 0.7          |            |                |      |          |       |     | 3.24  | meprin A, alpha (PABA peptide hydrolase)                         | 4.69E-05 | Y        |          |          |
| <i>Cplx2</i>      | 1.44  | 3.07E-05 | 6.60E-04 | 153.1        | 221.2        |            |                |      |          |       |     |       | complexin 2                                                      | 8.35E-01 | N        |          |          |
| <i>Hist3h2ba</i>  | 1.58  | 3.15E-05 | 6.76E-04 | 23.1         | 36.5         |            |                |      |          |       |     |       | histone cluster 3, H2ba, pseudogene                              | 7.52E-02 | N        |          |          |
| <i>Reep6</i>      | -2.06 | 3.17E-05 | 6.79E-04 | 2.5          | 1.2          |            |                |      |          |       |     |       | receptor accessory protein 6                                     | 1.07E-01 | N        |          |          |
| <i>Ldb2</i>       | -1.53 | 3.18E-05 | 6.80E-04 | 18.6         | 12.2         |            | 1              |      |          |       |     |       | LIM domain binding 2                                             | 5.42E-02 | N        |          |          |
| <i>Tmem63a</i>    | -1.54 | 3.23E-05 | 6.88E-04 | 9.7          | 6.3          |            | 1              |      |          |       |     | -1.35 | transmembrane protein 63A                                        | 4.94E-03 | Y        |          |          |
| <i>Cbfb</i>       | -1.52 | 3.23E-05 | 6.88E-04 | 13.4         | 8.8          |            |                |      |          |       |     |       | core-binding factor, beta subunit                                | 6.40E-02 | N        |          |          |
| <i>Sod2</i>       | -1.43 | 3.30E-05 | 7.02E-04 | 142.4        | 99.2         | 1          | 1              |      | 1        |       |     | -1.38 | superoxide dismutase 2, mitochondrial                            | 7.17E-05 | Y        |          |          |
| <i>Rasgrf1</i>    | -1.43 | 3.32E-05 | 7.05E-04 | 134.2        | 94.1         |            |                |      |          |       |     | -1.37 | Ras protein-specific guanine nucleotide-releasing factor 1       | 1.07E-04 | Y        |          |          |
| <i>Sfmbt2</i>     | -1.82 | 3.35E-05 | 7.10E-04 | 3.2          | 1.8          |            |                |      |          |       |     | -1.55 | Scm-like with four mbt domains 2                                 | 1.15E-03 | Y        |          |          |
| <i>C4bpb</i>      | -2.36 | 3.38E-05 | 7.14E-04 | 3.2          | 1.4          |            |                |      | 2        |       |     |       | complement component 4 binding protein, beta                     | 3.30E-01 | N        |          |          |
| <i>Nipa1</i>      | -1.47 | 3.38E-05 | 7.14E-04 | 51.0         | 34.8         |            |                |      | 1        |       |     | -1.43 | non imprinted in Prader-Willi/Angelman syndrome 1                | 2.64E-05 | Y        |          |          |
| <i>Pip4k2a</i>    | -1.46 | 3.45E-05 | 7.27E-04 | 38.3         | 26.3         |            | 1              |      | 2        |       |     |       | phosphatidylinositol-5-phosphate 4-kinase, type II, alpha        | 5.90E-02 | N        |          |          |
| <i>LOC363267</i>  | 1.66  | 3.51E-05 | 7.39E-04 | 5.2          | 8.7          |            |                |      |          |       |     | 2.09  |                                                                  | 5.63E-12 | Y        |          |          |
| <i>Lats2</i>      | 1.45  | 3.53E-05 | 7.42E-04 | 19.7         | 28.6         |            | 1              |      |          |       |     | 1.58  | LATS, large tumor suppressor, homolog 2 (Drosophila)             | 3.53E-08 | Y        |          |          |
| <i>Ghr</i>        | -1.58 | 3.56E-05 | 7.47E-04 | 7.8          | 4.9          |            |                |      |          |       |     |       | growth hormone receptor                                          | 9.34E-01 | N        |          |          |
| <i>Tgfa</i>       | -1.52 | 3.62E-05 | 7.58E-04 | 8.8          | 5.8          | 2          |                |      |          |       |     | -1.31 | transforming growth factor, alpha                                | 7.24E-03 | Y        |          |          |
| <i>Bcas1</i>      | -1.44 | 3.63E-05 | 7.59E-04 | 85.8         | 59.8         |            | 2              |      |          |       |     | -1.36 | breast carcinoma amplified sequence 1                            | 1.93E-04 | Y        |          |          |
| <i>Sptb</i>       | 1.43  | 3.65E-05 | 7.62E-04 | 56.5         | 80.7         |            |                |      |          |       |     | 2.05  | spectrin, beta, erythrocytic                                     | 2.50E-20 | Y        |          |          |
| <i>Slc22a6</i>    | 1.73  | 3.67E-05 | 7.63E-04 | 3.1          | 5.4          |            |                |      |          |       |     | 1.98  | solute carrier family 22 (organic anion transporter), member 6 / | 1.85E-08 | Y        |          |          |
| <i>T2</i>         | 1.65  | 3.67E-05 | 7.63E-04 | 6.3          | 10.5         |            |                |      |          |       |     | 1.99  |                                                                  | 1.55E-09 | Y        |          |          |
| <i>Plekho1</i>    | 1.45  | 3.68E-05 | 7.64E-04 | 52.8         | 76.8         |            | 1              |      | 2        |       |     | 1.94  | pleckstrin homology domain containing, family O member 1         | 5.63E-15 | Y        |          |          |
| <i>Lipa</i>       | -1.46 | 3.71E-05 | 7.69E-04 | 31.3         | 21.5         |            |                |      | 1        |       |     | -1.51 |                                                                  | 5.69E-07 | Y        |          |          |
| <i>Slc6a20</i>    | 1.52  | 3.73E-05 | 7.72E-04 | 12.8         | 19.4         |            | 1              |      |          |       |     | 2.23  | solute carrier family 6 (proline IMINO transporter), member 20   | 1.78E-18 | Y        |          |          |
| <i>Hdc</i>        | 1.96  | 3.80E-05 | 7.85E-04 | 1.3          | 2.6          |            |                |      |          |       |     | 1.74  | histidine decarboxylase                                          | 8.94E-04 | Y        |          |          |
| <i>Slc16a11</i>   | 1.61  | 3.83E-05 | 7.88E-04 | 6.4          | 10.3         |            |                |      |          |       |     | 1.85  | solute carrier family 16, member 11 (monocarboxylic acid transp  | 1.36E-06 | Y        |          |          |
| <i>Rnf148</i>     | 1.59  | 3.83E-05 | 7.88E-04 | 11.7         | 18.5         |            |                |      |          |       |     | 2.86  | ring finger protein 148                                          | 4.95E-16 | Y        |          |          |

Supplementary Table 1

| gene              | FC    | Pvalue   | FDR      | control RPKM | alcohol RPKM | P drinking | P vs. NP naïve | GWAS | GE in PM | AcbSh | CeA | DRN   | gene title                                                            | DRN FDR  | same dir | PAG+ ACB | PAG+ CeA |
|-------------------|-------|----------|----------|--------------|--------------|------------|----------------|------|----------|-------|-----|-------|-----------------------------------------------------------------------|----------|----------|----------|----------|
| <i>Epha4</i>      | -1.45 | 3.95E-05 | 8.12E-04 | 18.5         | 12.8         |            | 1              |      |          |       |     |       | EPH receptor A4                                                       | 4.52E-01 | N        |          |          |
| <i>Slc6a11</i>    | -1.42 | 3.98E-05 | 8.16E-04 | 260.4        | 183.0        |            |                | 1    |          |       |     |       | solute carrier family 6 (neurotransmitter transporter, GA)            | 5.28E-02 | N        |          |          |
| <i>P2rx2</i>      | -2.09 | 3.99E-05 | 8.17E-04 | 2.6          | 1.3          |            |                |      |          |       |     | -1.85 | purinergic receptor P2X, ligand-gated ion channel, 2                  | 3.05E-07 | Y        |          |          |
| <i>Shisa7</i>     | -1.47 | 4.01E-05 | 8.20E-04 | 12.0         | 8.2          |            | 1              |      |          |       |     | -1.45 | shisa homolog 7 ( <i>Xenopus laevis</i> )                             | 1.92E-05 | Y        |          |          |
| <i>Egln3</i>      | -1.56 | 4.02E-05 | 8.20E-04 | 9.4          | 6.0          | 1          | 1              |      | 1        |       |     | -1.38 | egl nine homolog 3 ( <i>C. elegans</i> )                              | 2.51E-03 | Y        |          |          |
| <i>Shisa6</i>     | 1.53  | 4.04E-05 | 8.23E-04 | 13.9         | 21.2         |            |                |      |          |       |     | 1.80  | shisa homolog 6 ( <i>Xenopus laevis</i> )                             | 3.86E-09 | Y        |          |          |
| <i>Sgcz</i>       | -1.79 | 4.09E-05 | 8.32E-04 | 7.7          | 4.3          |            |                |      |          |       |     | -1.49 | sarcoglycan, zeta                                                     | 4.40E-03 | Y        |          |          |
| <i>Zic4</i>       | 1.61  | 4.10E-05 | 8.32E-04 | 5.6          | 8.9          |            | 1              |      |          |       |     | 2.61  | Zic family member 4                                                   | 2.49E-13 | Y        |          |          |
| <i>Sh3kbp1</i>    | -1.49 | 4.11E-05 | 8.32E-04 | 15.8         | 10.6         | 1          |                |      | 1        |       |     | -1.53 | SH3-domain kinase binding protein 1                                   | 9.37E-07 | Y        |          |          |
| <i>Mpped1</i>     | -1.47 | 4.11E-05 | 8.32E-04 | 21.3         | 14.5         |            |                |      |          |       |     | -1.62 | metallophosphoesterase domain containing 1                            | 5.60E-08 | Y        |          |          |
| <i>Cobl</i>       | -1.49 | 4.17E-05 | 8.42E-04 | 10.9         | 7.3          |            | 1              |      |          |       |     | -1.69 | cordon-bleu homolog (mouse)                                           | 3.58E-10 | Y        |          |          |
| <i>Pax6</i>       | 1.47  | 4.18E-05 | 8.42E-04 | 22.5         | 33.2         |            |                |      |          |       |     | 2.19  | paired box 6                                                          | 8.56E-18 | Y        |          |          |
| <i>Gabra3</i>     | -1.53 | 4.19E-05 | 8.42E-04 | 25.8         | 16.9         |            |                |      |          |       |     | -1.69 | gamma-aminobutyric acid (GABA) A receptor, alpha 3                    | 3.65E-09 | Y        |          |          |
| <i>Osbp2</i>      | 1.45  | 4.19E-05 | 8.42E-04 | 19.5         | 28.3         |            |                |      |          |       |     | 1.81  | oxysterol binding protein 2                                           | 2.30E-12 | Y        |          |          |
| <i>Nrsn1</i>      | -1.45 | 4.23E-05 | 8.49E-04 | 83.4         | 57.5         |            |                |      |          |       |     | -1.39 | neurensin 1                                                           | 9.45E-05 | Y        |          |          |
| <i>Ppfia4</i>     | 1.43  | 4.24E-05 | 8.50E-04 | 42.8         | 61.0         |            |                |      |          |       |     | 1.56  | protein tyrosine phosphatase, receptor type, f polypeptide (PTPRF)    | 3.74E-08 | Y        |          |          |
| <i>RGD1562284</i> | -1.61 | 4.28E-05 | 8.56E-04 | 19.5         | 12.1         |            |                |      |          |       |     | -1.77 | von Willebrand factor A domain containing 5B2                         | 3.12E-09 | Y        |          |          |
| <i>Vwa5b2</i>     | -1.46 | 4.33E-05 | 8.63E-04 | 20.5         | 14.1         |            |                |      |          |       |     | -1.21 | CD99 molecule-like 2                                                  | 4.72E-02 | Y        |          |          |
| <i>Cd99l2</i>     | -1.43 | 4.33E-05 | 8.63E-04 | 58.4         | 40.8         |            |                |      | 1        |       |     | -1.45 | CD99 molecule-like 2                                                  | 3.91E-06 | Y        |          |          |
| <i>Sptbn2</i>     | 1.42  | 4.39E-05 | 8.74E-04 | 80.5         | 114.3        |            | 1              |      | 2        |       |     | 1.71  | spectrin, beta, non-erythrocytic 2                                    | 3.33E-12 | Y        |          |          |
| <i>Wdr86</i>      | 4.04  | 4.42E-05 | 8.78E-04 | 0.2          | 0.9          |            |                |      |          |       |     | 2.46  | WD repeat domain 86                                                   | 1.17E-03 | Y        |          |          |
| <i>Rnd2</i>       | -1.43 | 4.45E-05 | 8.83E-04 | 134.2        | 93.5         |            |                |      | 1        |       |     |       | Rho family GTPase 2                                                   | 6.09E-02 | N        |          |          |
| <i>Slc9a3r1</i>   | 1.49  | 4.50E-05 | 8.91E-04 | 23.1         | 34.4         | 1          | 2              |      |          |       |     | 2.08  | solute carrier family 9, subfamily A (NHE3, cation proton antiporter) | 3.66E-15 | Y        |          |          |
| <i>Bcar1</i>      | 1.44  | 4.53E-05 | 8.96E-04 | 32.3         | 46.4         |            |                |      |          |       |     | 1.67  | breast cancer anti-estrogen resistance 1                              | 3.48E-10 | Y        |          |          |
| <i>Neurl</i>      | 1.50  | 4.54E-05 | 8.96E-04 | 33.3         | 50.1         |            |                |      |          |       |     | 1.43  | neuralized homolog ( <i>Drosophila</i> )                              | 3.60E-04 | Y        |          |          |
| <i>Stk10</i>      | 1.54  | 4.62E-05 | 9.11E-04 | 3.7          | 5.7          |            |                |      |          |       |     | 1.59  | serine/threonine kinase 10                                            | 9.63E-06 | Y        |          |          |
| <i>Pih1d2</i>     | 1.61  | 4.64E-05 | 9.13E-04 | 8.7          | 13.9         |            |                |      |          |       |     | 1.90  | PIH1 domain containing 2                                              | 2.92E-10 | Y        |          |          |
| <i>Ppp2r2b</i>    | -1.45 | 4.71E-05 | 9.25E-04 | 41.0         | 28.3         |            |                | 1    |          |       |     | -1.47 | protein phosphatase 2, regulatory subunit B, beta                     | 2.88E-06 | Y        |          |          |
| <i>Tnni3</i>      | 1.81  | 4.80E-05 | 9.42E-04 | 5.6          | 10.2         |            |                |      |          |       |     | 2.20  | troponin I type 3 (cardiac)                                           | 2.91E-08 | Y        |          |          |
| <i>Slc26a3</i>    | 2.89  | 4.81E-05 | 9.42E-04 | 0.3          | 0.8          |            |                | 1    |          |       |     | 1.79  | solute carrier family 26, member 3                                    | 2.44E-02 | Y        |          |          |
| <i>Chst7</i>      | 1.55  | 4.93E-05 | 9.64E-04 | 6.9          | 10.7         |            |                |      |          |       |     | 2.39  | carbohydrate (N-acetylglucosamine 6-O) sulfotransferase 7             | 3.74E-14 | Y        |          |          |
| <i>Slc2a10</i>    | 1.58  | 5.01E-05 | 9.78E-04 | 3.6          | 5.7          |            |                |      |          |       |     | 1.70  | solute carrier family 2 (facilitated glucose transporter), member 10  | 7.27E-07 | Y        |          |          |
| <i>Ugt1a8</i>     | -1.76 | 5.03E-05 | 9.80E-04 | 4.2          | 2.4          |            |                |      |          |       |     |       | transgelin                                                            | 3.81E-01 | N        |          |          |
| <i>Tagln</i>      | 1.60  | 5.09E-05 | 9.90E-04 | 11.0         | 17.5         |            | 3              |      |          |       |     | 1.28  | transgelin                                                            | 3.58E-02 | Y        |          |          |
| <i>Rab26</i>      | -1.49 | 5.18E-05 | 1.01E-03 | 43.1         | 28.9         |            |                |      |          |       |     | -1.57 | RAB26, member RAS oncogene family                                     | 4.27E-07 | Y        |          |          |
| <i>Lrrc50</i>     | 1.60  | 5.22E-05 | 1.01E-03 | 5.0          | 8.0          |            |                |      |          |       |     | 2.23  |                                                                       | 1.93E-13 | Y        |          |          |
| <i>Dhcr7</i>      | -1.49 | 5.24E-05 | 1.01E-03 | 18.6         | 12.5         | 1          |                |      |          |       |     | -1.39 | 7-dehydrocholesterol reductase                                        | 4.07E-04 | Y        |          |          |
| <i>Hs3st2</i>     | -1.71 | 5.28E-05 | 1.02E-03 | 4.8          | 2.8          | 1          |                |      |          |       |     | -1.79 | heparan sulfate (glucosamine) 3-O-sulfotransferase 2                  | 1.25E-08 | Y        |          |          |
| <i>Slc35f1</i>    | -1.45 | 5.31E-05 | 1.03E-03 | 23.8         | 16.5         |            |                |      |          |       |     | -1.47 | solute carrier family 35, member F1                                   | 4.52E-06 | Y        |          |          |

Supplementary Table 1

| gene            | FC    | Pvalue   | FDR      | control RPKM | alcohol RPKM | P drinking | P vs. NP naïve | GWAS | GE in PM | AcbSh | CeA  | DRN   | gene title                                                       | DRN FDR  | same dir | PAG+ ACB | PAG+ CeA |
|-----------------|-------|----------|----------|--------------|--------------|------------|----------------|------|----------|-------|------|-------|------------------------------------------------------------------|----------|----------|----------|----------|
| <i>Nfix</i>     | 1.45  | 5.37E-05 | 1.03E-03 | 45.0         | 65.3         |            | 1              |      |          |       |      | 2.33  | nuclear factor I/X (CCAAT-binding transcription factor)          | 5.78E-23 | Y        |          |          |
| <i>Slc5a11</i>  | -1.56 | 5.46E-05 | 1.05E-03 | 11.4         | 7.3          |            | 1              |      |          |       |      | -1.29 | solute carrier family 5 (sodium/glucose cotransporter), member 1 | 2.51E-02 | Y        |          |          |
| <i>Gpr63</i>    | 1.50  | 5.47E-05 | 1.05E-03 | 11.4         | 17.0         |            |                |      |          |       |      | 2.67  | G protein-coupled receptor 63                                    | 1.30E-23 | Y        |          |          |
| <i>Stk35</i>    | 1.48  | 5.50E-05 | 1.06E-03 | 10.3         | 15.2         |            |                |      |          |       |      | 1.31  | serine/threonine kinase 35                                       | 6.92E-03 | Y        |          |          |
| <i>Mlf1</i>     | 1.51  | 5.55E-05 | 1.06E-03 | 21.6         | 32.5         |            |                |      |          |       |      | 1.69  | myeloid leukemia factor 1                                        | 4.97E-09 | Y        |          |          |
| <i>Cacna1h</i>  | -1.46 | 5.55E-05 | 1.06E-03 | 9.1          | 6.2          | 1          |                |      |          |       |      | -1.39 | calcium channel, voltage-dependent, T type, alpha 1H subu        | 2.46E-04 | Y        |          |          |
| <i>Rora</i>     | 1.44  | 5.56E-05 | 1.06E-03 | 50.1         | 72.1         |            |                |      |          |       |      | 1.89  | RAR-related orphan receptor A                                    | 2.50E-14 | Y        |          |          |
| <i>Sh3bgrl</i>  | -1.43 | 5.67E-05 | 1.08E-03 | 53.4         | 37.3         |            |                |      |          |       |      | -1.26 | SH3 domain binding glutamic acid-rich protein like               | 7.88E-03 | Y        |          |          |
| <i>Snrnp70</i>  | 1.42  | 5.71E-05 | 1.09E-03 | 171.0        | 242.7        |            |                |      |          |       |      | 1.33  | small nuclear ribonucleoprotein 70kDa (U1)                       | 8.19E-04 | Y        |          |          |
| <i>Pld5</i>     | 1.49  | 5.77E-05 | 1.09E-03 | 17.6         | 26.1         |            |                |      |          |       |      | 1.84  | phospholipase D family, member 5                                 | 9.38E-11 | Y        |          |          |
| <i>Cntnap5</i>  | -1.46 | 5.77E-05 | 1.09E-03 | 17.1         | 11.7         |            |                |      |          |       |      | -1.47 | contactin associated protein-like 5                              | 6.61E-06 | Y        |          |          |
| <i>Tmem109</i>  | 1.45  | 5.78E-05 | 1.09E-03 | 32.2         | 46.7         |            |                |      | 1        |       |      | 1.58  | transmembrane protein 109                                        | 2.39E-07 | Y        |          |          |
| <i>Nrep</i>     | 1.42  | 5.81E-05 | 1.10E-03 | 366.8        | 522.0        |            | 1              |      |          |       |      | 2.99  | neuronal regeneration related protein homolog (rat)              | 1.54E-42 | Y        |          |          |
| <i>Krt1</i>     | -2.47 | 5.86E-05 | 1.11E-03 | 1.2          | 0.5          |            |                | 1    |          |       |      | -2.52 | keratin 1                                                        | 9.12E-04 | Y        |          |          |
| <i>Cckbr</i>    | -1.77 | 5.88E-05 | 1.11E-03 | 4.2          | 2.4          |            |                |      |          |       |      | -1.88 | cholecystokinin B receptor                                       | 2.83E-05 | Y        |          |          |
| <i>Mir124-1</i> | 1.51  | 5.96E-05 | 1.12E-03 | 238.1        | 360.5        |            |                |      |          |       |      | 2.08  | microRNA 124-1                                                   | 5.27E-12 | Y        |          |          |
| <i>Glr3</i>     | -1.61 | 6.00E-05 | 1.13E-03 | 4.1          | 2.6          |            |                |      |          |       |      | -1.56 | glycine receptor, alpha 3                                        | 4.53E-03 | Y        |          |          |
| <i>Nr5a2</i>    | -3.28 | 6.07E-05 | 1.14E-03 | 0.9          | 0.3          |            |                |      | 1        |       |      |       | nuclear receptor subfamily 5, group A, member 2                  | 0.00E+00 | N        |          |          |
| <i>Plekhh1</i>  | -1.42 | 6.07E-05 | 1.14E-03 | 32.3         | 22.7         |            |                |      |          |       |      | -1.37 | pleckstrin homology domain containing, family H (with MyTH4 doma | 1.88E-04 | Y        |          |          |
| <i>Spata2L</i>  | 1.50  | 6.22E-05 | 1.16E-03 | 8.7          | 13.0         |            | 1              |      |          |       |      | 1.42  | spermatogenesis associated 2-like                                | 6.47E-04 | Y        |          |          |
| <i>Lcat</i>     | 1.48  | 6.25E-05 | 1.17E-03 | 25.2         | 37.2         |            |                |      |          |       |      | 2.37  | lecithin-cholesterol acyltransferase                             | 2.00E-22 | Y        |          |          |
| <i>Ccng2</i>    | 1.43  | 6.26E-05 | 1.17E-03 | 40.8         | 58.4         |            |                |      |          |       |      | 2.58  | cyclin G2                                                        | 8.20E-30 | Y        |          |          |
| <i>Emid1</i>    | 1.57  | 6.34E-05 | 1.18E-03 | 7.8          | 12.2         |            | 1              |      |          |       |      | 2.46  | EMI domain containing 1                                          | 6.07E-15 | Y        |          |          |
| <i>Exoc3l</i>   | 1.59  | 6.35E-05 | 1.18E-03 | 4.5          | 7.2          |            |                |      |          |       |      | 2.06  | exocyst complex component 3-like                                 | 5.85E-09 | Y        |          |          |
| <i>Galnt9</i>   | 1.43  | 6.43E-05 | 1.19E-03 | 27.6         | 39.6         |            |                |      |          |       |      | 1.62  | UDP-N-acetyl-alpha-D-galactosamine:polypeptide N-acetylglactosam | 2.35E-08 | Y        |          |          |
| <i>Zdhc20</i>   | -1.43 | 6.47E-05 | 1.20E-03 | 64.4         | 44.9         |            |                |      | 1        |       |      | -1.43 | zinc finger, DHHC-type containing 20                             | 1.95E-05 | Y        |          |          |
| <i>Nsun7</i>    | -1.90 | 6.50E-05 | 1.20E-03 | 4.4          | 2.3          |            |                |      |          |       |      | -1.45 | NOP2/Sun domain family, member 7                                 | 1.77E-02 | Y        |          |          |
| <i>Als2</i>     | 1.41  | 6.66E-05 | 1.23E-03 | 73.8         | 104.1        |            |                |      |          |       |      | 1.87  | amyotrophic lateral sclerosis 2 (juvenile)                       | 1.05E-15 | Y        |          |          |
| <i>Phf21b</i>   | 1.64  | 6.68E-05 | 1.23E-03 | 4.1          | 6.7          |            |                |      |          |       |      | 3.15  | PHD finger protein 21B                                           | 2.70E-16 | Y        |          |          |
| <i>Pkp1</i>     | -2.09 | 6.77E-05 | 1.25E-03 | 1.0          | 0.5          |            |                |      |          |       |      |       | plakophilin 1 (ectodermal dysplasia/skin fragility syndrome)     | 9.77E-01 | N        |          |          |
| <i>Pqcp</i>     | 1.47  | 6.84E-05 | 1.26E-03 | 14.9         | 21.9         |            |                |      |          |       |      | 1.27  |                                                                  | 1.61E-02 | Y        |          |          |
| <i>Hspa12a</i>  | -1.41 | 6.86E-05 | 1.26E-03 | 56.5         | 40.0         | 1          |                | 1    |          |       | 1.12 | -1.22 | heat shock 70kDa protein 12A                                     | 2.33E-02 | Y        |          | N        |
| <i>Vwc2l</i>    | -1.64 | 6.87E-05 | 1.26E-03 | 10.0         | 6.1          |            |                |      |          |       |      | -1.88 | von Willebrand factor C domain containing protein 2-like         | 2.84E-09 | Y        |          |          |
| <i>Aebp1</i>    | 1.49  | 6.87E-05 | 1.26E-03 | 6.6          | 9.9          |            |                |      |          |       |      | 2.23  | AE binding protein 1                                             | 1.86E-18 | Y        |          |          |
| <i>Nrgn</i>     | -1.47 | 6.90E-05 | 1.26E-03 | 42.5         | 28.9         | 1          | 1              |      | 1        |       |      |       | neurogranin (protein kinase C substrate, RC3)                    | 5.71E-01 | N        |          |          |
| <i>Sh3bgrl3</i> | -1.51 | 6.94E-05 | 1.27E-03 | 44.7         | 29.7         |            | 1              |      |          |       |      | -1.57 | SH3 domain binding glutamic acid-rich protein like 3             | 1.52E-07 | Y        |          |          |

Supplementary Table 1

| gene              | FC    | Pvalue   | FDR      | control RPKM | alcohol RPKM | P drinking | P vs. NP naïve | GWAS | GE in PM | AcbSh | CeA | DRN   | gene title                                                                    | DRN FDR  | same dir | PAG+ ACB | PAG+ CeA |
|-------------------|-------|----------|----------|--------------|--------------|------------|----------------|------|----------|-------|-----|-------|-------------------------------------------------------------------------------|----------|----------|----------|----------|
| <i>Agtr1a</i>     | -2.62 | 7.11E-05 | 1.30E-03 | 1.2          | 0.4          | 1          |                |      |          |       |     |       | angiotensin II receptor, type 1a                                              | 3.26E-03 | Y        |          |          |
| <i>Ldlr</i>       | -1.45 | 7.12E-05 | 1.30E-03 | 25.2         | 17.4         |            |                |      |          |       |     |       | low density lipoprotein receptor                                              | 2.37E-05 | Y        |          |          |
| <i>Cpt1b</i>      | 1.53  | 7.20E-05 | 1.31E-03 | 6.2          | 9.4          |            |                |      | 1        |       |     |       | carnitine palmitoyltransferase 1b, muscle                                     | 4.07E-12 | Y        |          |          |
| <i>Dpy19l1</i>    | -1.42 | 7.22E-05 | 1.31E-03 | 38.5         | 27.1         |            |                |      |          |       |     |       | dpy-19-like 1 (C. elegans)                                                    | 7.56E-02 | N        |          |          |
| <i>Serinc5</i>    | -1.41 | 7.23E-05 | 1.31E-03 | 47.2         | 33.4         |            |                |      |          |       |     |       | serine incorporator 5                                                         | 4.88E-01 | N        |          |          |
| <i>Gpr37</i>      | -1.41 | 7.27E-05 | 1.32E-03 | 84.6         | 59.9         |            | 1              |      | 1        |       |     |       | G protein-coupled receptor 37 (endothelin receptor type B-like) //            | 1.36E-03 | Y        |          |          |
| <i>Csad</i>       | 1.46  | 7.28E-05 | 1.32E-03 | 18.8         | 27.5         |            | 1              |      |          |       |     |       | cysteine sulfinic acid decarboxylase                                          | 4.30E-06 | Y        |          |          |
| <i>Glr2</i>       | -1.45 | 7.33E-05 | 1.32E-03 | 21.9         | 15.0         |            | 1              |      |          |       |     |       | glycine receptor, alpha 2                                                     | 4.03E-19 | Y        |          |          |
| <i>Cp</i>         | -1.49 | 7.35E-05 | 1.32E-03 | 10.4         | 7.0          | 2          | 1              |      |          |       |     | -1.32 | ceruloplasmin (ferroxidase)                                                   | 1.74E-05 | N        |          | N        |
| <i>Loxl3</i>      | 1.69  | 7.39E-05 | 1.33E-03 | 2.4          | 4.0          |            |                |      |          |       |     |       | lysyl oxidase-like 3                                                          | 9.00E-06 | Y        |          |          |
| <i>Flna</i>       | 1.42  | 7.41E-05 | 1.33E-03 | 17.3         | 24.5         |            |                |      |          |       |     |       | filamin A, alpha                                                              | 1.49E-04 | Y        |          |          |
| <i>Grm5</i>       | -1.43 | 7.51E-05 | 1.35E-03 | 30.4         | 21.3         |            | 1              | 1    |          |       |     |       | glutamate receptor, metabotropic 5                                            | 7.27E-02 | N        |          |          |
| <i>Zbtb16</i>     | -1.48 | 7.54E-05 | 1.35E-03 | 19.4         | 13.2         |            |                |      | 1        |       |     |       | zinc finger and BTB domain containing 16                                      | 1.10E-03 | Y        |          |          |
| <i>Plekhg1</i>    | -1.48 | 7.61E-05 | 1.36E-03 | 10.2         | 6.9          |            |                |      |          |       |     |       | pleckstrin homology domain containing, family G (with Rho                     | 4.44E-03 | Y        |          |          |
| <i>Aadat</i>      | -1.96 | 7.78E-05 | 1.39E-03 | 3.0          | 1.5          | 1          | 1              |      |          |       |     |       | aminoadipate aminotransferase                                                 | 9.64E-01 | N        |          |          |
| <i>Capsl</i>      | 1.67  | 7.80E-05 | 1.39E-03 | 7.4          | 12.4         |            |                |      |          |       |     |       | calciphosine-like                                                             | 2.82E-10 | Y        |          |          |
| <i>Klk6</i>       | -1.50 | 7.95E-05 | 1.42E-03 | 29.8         | 19.8         | 1          | 1              |      | 3        |       |     |       | kallikrein-related peptidase 6                                                | 3.29E-03 | Y        |          |          |
| <i>Prc1</i>       | 1.57  | 8.02E-05 | 1.43E-03 | 4.2          | 6.6          |            |                |      |          |       |     |       | protein regulator of cytokinesis 1                                            | 2.63E-09 | Y        |          |          |
| <i>Hcrt</i>       | 1.77  | 8.03E-05 | 1.43E-03 | 8.5          | 15.0         |            |                |      |          |       |     |       | hypocretin (orexin) neuropeptide precursor                                    | 5.89E-11 | Y        |          |          |
| <i>Galnt1</i>     | -1.42 | 8.10E-05 | 1.44E-03 | 39.3         | 27.6         |            |                |      |          |       |     |       | UDP-N-acetyl-alpha-D-galactosamine:polypeptide N-acetylglactosyltransferase 1 | 3.49E-02 | Y        |          |          |
| <i>Robo2</i>      | -1.42 | 8.46E-05 | 1.50E-03 | 17.2         | 12.1         |            | 1              |      |          |       |     |       | roundabout, axon guidance receptor, homolog 2 (Drosophila)                    | 5.24E-05 | Y        |          |          |
| <i>Igsf1</i>      | -1.43 | 8.52E-05 | 1.51E-03 | 27.2         | 19.1         |            | 1              |      |          |       |     |       | immunoglobulin superfamily, member 1                                          | 2.58E-05 | Y        |          |          |
| <i>Serpinf1</i>   | -1.72 | 8.58E-05 | 1.51E-03 | 7.7          | 4.5          |            |                |      | 1        |       |     |       | serpin peptidase inhibitor, clade F (alpha-2 antiplasmin, pigme               | 9.22E-01 | N        |          |          |
| <i>Fah</i>        | -1.51 | 8.58E-05 | 1.51E-03 | 21.4         | 14.2         |            |                |      |          |       |     |       | fumarylacetoacetate hydrolase (fumarylacetoacetase)                           | 5.53E-03 | Y        |          |          |
| <i>Rtn4rl1</i>    | 1.44  | 8.61E-05 | 1.51E-03 | 16.3         | 23.5         |            | 2              |      |          |       |     |       | reticulon 4 receptor-like 1                                                   | 5.69E-25 | Y        |          |          |
| <i>Adam32</i>     | -2.32 | 8.71E-05 | 1.53E-03 | 1.4          | 0.6          |            |                |      |          |       |     |       | ADAM metallopeptidase domain 32                                               | 5.66E-02 | N        |          |          |
| <i>Hsd17b11</i>   | -1.50 | 8.80E-05 | 1.54E-03 | 21.1         | 14.1         |            |                |      | 1        |       |     |       | hydroxysteroid (17-beta) dehydrogenase 11                                     | 3.42E-01 | N        |          |          |
| <i>Pfn2</i>       | -1.40 | 8.83E-05 | 1.55E-03 | 298.7        | 213.5        |            |                |      |          |       |     |       | profilin 2                                                                    | 1.99E-05 | Y        |          |          |
| <i>Zfp385b</i>    | 1.42  | 8.92E-05 | 1.56E-03 | 26.4         | 37.5         |            |                |      |          |       |     |       |                                                                               | 2.79E-16 | Y        |          |          |
| <i>Unc5d</i>      | -1.45 | 8.93E-05 | 1.56E-03 | 21.6         | 14.9         |            |                |      |          |       |     |       | unc-5 homolog D (C. elegans)                                                  | 1.62E-05 | Y        |          |          |
| <i>Itga11</i>     | 1.46  | 8.95E-05 | 1.56E-03 | 6.9          | 10.1         |            |                |      |          |       |     |       | integrin, alpha 11                                                            | 7.12E-44 | Y        |          |          |
| <i>Kcnj9</i>      | 1.50  | 8.97E-05 | 1.56E-03 | 9.8          | 14.8         | 1          |                |      |          |       |     |       | potassium inwardly-rectifying channel, subfamily J, member 9                  | 1.89E-01 | N        |          |          |
| <i>Txnrd3</i>     | -1.62 | 8.99E-05 | 1.56E-03 | 5.0          | 3.1          |            | 2              |      |          |       |     |       | thioredoxin reductase 3                                                       | 2.62E-02 | Y        |          |          |
| <i>Robo1</i>      | -1.43 | 9.03E-05 | 1.57E-03 | 21.6         | 15.2         |            |                |      |          |       |     |       | roundabout, axon guidance receptor, homolog 1 (Drosophila)                    | 5.67E-03 | Y        |          |          |
| <i>Smyd2</i>      | -1.44 | 9.09E-05 | 1.58E-03 | 49.9         | 34.7         |            | 1              |      |          |       |     |       | SET and MYND domain containing 2                                              | 1.98E-06 | Y        |          |          |
| <i>Cldn10</i>     | -1.66 | 9.10E-05 | 1.58E-03 | 9.2          | 5.5          |            |                |      |          |       |     |       | claudin 10                                                                    | 3.49E-02 | Y        |          |          |
| <i>RGD1310773</i> | -1.58 | 9.21E-05 | 1.59E-03 | 6.1          | 3.9          |            |                |      |          |       |     |       |                                                                               | 1.36E-03 | Y        |          |          |
| <i>Tymp</i>       | 1.51  | 9.23E-05 | 1.59E-03 | 7.9          | 11.9         |            |                |      |          |       |     |       | thymidine phosphorylase                                                       | 4.21E-04 | Y        |          |          |

Supplementary Table 1

| gene                | FC    | Pvalue   | FDR      | control RPKM | alcohol RPKM | P drinking | P vs. NP naïve | GWAS | GE in PM | AcbSh | CeA | DRN   | gene title                                                                    | DRN FDR  | same dir | PAG+ ACB | PAG+ CeA |
|---------------------|-------|----------|----------|--------------|--------------|------------|----------------|------|----------|-------|-----|-------|-------------------------------------------------------------------------------|----------|----------|----------|----------|
| <i>Ppp1r14a</i>     | -1.69 | 9.39E-05 | 1.62E-03 | 19.9         | 11.7         |            | 1              |      | 1        |       |     | -1.53 | protein phosphatase 1, regulatory (inhibitor) subunit 14A                     | 4.11E-03 | Y        |          |          |
| <i>Kcnj3</i>        | 1.41  | 9.46E-05 | 1.63E-03 | 74.5         | 105.3        |            |                |      |          |       |     | 1.70  | potassium inwardly-rectifying channel, subfamily J, member 3                  | 8.67E-11 | Y        |          |          |
| <i>LOC501110</i>    | -2.02 | 9.68E-05 | 1.66E-03 | 2.3          | 1.1          |            |                |      |          |       |     | -1.60 |                                                                               | 1.23E-02 | Y        |          |          |
| <i>Trpm2</i>        | -1.49 | 9.69E-05 | 1.66E-03 | 8.1          | 5.4          |            |                |      |          |       |     | -1.24 | transient receptor potential cation channel, subfamily M, member 2            | 3.88E-02 | Y        |          |          |
| <i>Abcc8</i>        | 1.42  | 9.71E-05 | 1.66E-03 | 18.1         | 25.8         |            |                |      |          |       |     | 1.51  | ATP-binding cassette, sub-family C (CFTR/MRP), member 8                       | 1.95E-06 | Y        |          |          |
| <i>RGD1564149</i>   | 1.60  | 1.03E-04 | 1.76E-03 | 6.7          | 10.7         |            |                |      |          |       |     | 2.12  |                                                                               | 1.25E-11 | Y        |          |          |
| <i>Pnpla1</i>       | -1.81 | 1.03E-04 | 1.76E-03 | 3.9          | 2.2          |            |                |      |          |       |     | -1.83 | patatin-like phospholipase domain containing 1                                | 2.22E-04 | Y        |          |          |
| <i>Syt9</i>         | 1.46  | 1.04E-04 | 1.77E-03 | 22.8         | 33.2         |            |                |      |          |       |     | 1.37  | synaptotagmin IX                                                              | 1.71E-03 | Y        |          |          |
| <i>Pctk3</i>        | -1.49 | 1.04E-04 | 1.77E-03 | 22.9         | 15.4         |            |                |      | 1        |       |     | -1.29 |                                                                               | 2.01E-02 | Y        |          |          |
| <i>Capn1</i>        | 1.45  | 1.05E-04 | 1.78E-03 | 12.6         | 18.4         |            |                |      | 1        |       |     | 1.77  | calpain 1, (mu/l) large subunit                                               | 2.08E-09 | Y        |          |          |
| <i>Npas2</i>        | -1.53 | 1.07E-04 | 1.82E-03 | 5.6          | 3.7          |            | 2              |      | 1        |       |     |       | neuronal PAS domain protein 2                                                 | 2.20E-01 | N        |          |          |
| <i>LOC360919</i>    | -2.82 | 1.10E-04 | 1.86E-03 | 1.4          | 0.5          |            |                |      |          |       |     | -1.87 |                                                                               | 6.31E-03 | Y        |          |          |
| <i>Gata2</i>        | -1.76 | 1.12E-04 | 1.89E-03 | 2.3          | 1.3          |            |                |      |          |       |     | -1.57 | GATA binding protein 2                                                        | 2.31E-06 | Y        |          |          |
| <i>Tmem178</i>      | 1.43  | 1.12E-04 | 1.90E-03 | 35.7         | 51.0         |            | 1              |      |          |       |     | 2.10  |                                                                               | 2.23E-17 | Y        |          |          |
| <i>Rph3al</i>       | 1.59  | 1.13E-04 | 1.91E-03 | 5.2          | 8.3          |            |                |      |          |       |     | 1.81  | rabphilin 3A-like (without C2 domains)                                        | 6.51E-07 | Y        |          |          |
| <i>Ugt1a2</i>       | -1.73 | 1.17E-04 | 1.97E-03 | 3.9          | 2.2          |            |                |      |          |       |     |       |                                                                               | 5.33E-01 | N        |          |          |
| <i>Lox</i>          | 1.79  | 1.17E-04 | 1.97E-03 | 2.3          | 4.1          |            | 1              |      |          |       |     | 2.34  | lysyl oxidase                                                                 | 3.59E-08 | Y        |          |          |
| <i>Ddo</i>          | 1.81  | 1.19E-04 | 2.00E-03 | 3.7          | 6.6          |            |                |      |          |       |     | 1.86  | D-aspartate oxidase                                                           | 6.80E-06 | Y        |          |          |
| <i>Dhcr24</i>       | -1.40 | 1.20E-04 | 2.02E-03 | 125.3        | 89.3         |            |                |      |          |       |     | -1.43 | 24-dehydrocholesterol reductase                                               | 1.30E-05 | Y        |          |          |
| <i>Ptk2b</i>        | -1.45 | 1.20E-04 | 2.02E-03 | 13.2         | 9.1          |            | 1              |      |          |       |     |       | PTK2B protein tyrosine kinase 2 beta                                          | 8.60E-01 | N        |          |          |
| <i>Pacrg</i>        | 1.54  | 1.21E-04 | 2.02E-03 | 11.6         | 17.9         |            |                |      |          |       |     | 1.63  | PARK2 co-regulated                                                            | 1.81E-06 | Y        |          |          |
| <i>Myo1d</i>        | -1.44 | 1.23E-04 | 2.05E-03 | 11.0         | 7.6          |            | 1              |      | 1        |       |     | -1.38 | myosin ID                                                                     | 4.29E-04 | Y        |          |          |
| <i>Ccdc22</i>       | 1.45  | 1.24E-04 | 2.08E-03 | 13.2         | 19.2         |            |                |      |          |       |     |       | coiled-coil domain containing 22                                              | 5.42E-02 | N        |          |          |
| <i>Kcnh1</i>        | 1.41  | 1.25E-04 | 2.09E-03 | 20.0         | 28.2         |            | 1              |      |          |       |     | 2.24  | potassium voltage-gated channel, subfamily H (eag-related), member            | 2.03E-21 | Y        |          |          |
| <i>Galnt16</i>      | -1.60 | 1.29E-04 | 2.15E-03 | 7.3          | 4.6          |            |                |      |          |       |     | -1.83 | UDP-N-acetyl-alpha-D-galactosamine:polypeptide N-acetylglucosyltransferase 16 | 9.74E-11 | Y        |          |          |
| <i>Bmper</i>        | -1.60 | 1.30E-04 | 2.17E-03 | 5.3          | 3.3          |            |                |      |          |       |     |       | BMP binding endothelial regulator                                             | 3.94E-01 | N        |          |          |
| <i>Plagl1</i>       | -1.48 | 1.30E-04 | 2.17E-03 | 7.7          | 5.2          |            | 2              |      | 1        |       |     |       | pleiomorphic adenoma gene-like 1                                              | 3.23E-01 | N        |          |          |
| <i>LOC100302465</i> | -1.70 | 1.32E-04 | 2.18E-03 | 3.2          | 1.9          |            |                |      |          |       |     | -1.91 |                                                                               | 5.36E-07 | Y        |          |          |
| <i>Cd24</i>         | 1.45  | 1.32E-04 | 2.18E-03 | 19.6         | 28.3         |            | 1              |      | 3        |       |     | 1.54  | CD24 molecule                                                                 | 1.23E-06 | Y        |          |          |
| <i>Mme11</i>        | -1.68 | 1.32E-04 | 2.19E-03 | 3.7          | 2.2          |            |                |      |          |       |     | -1.73 | membrane metallo-endopeptidase-like 1                                         | 1.90E-05 | Y        |          |          |
| <i>Dnajb13</i>      | 1.72  | 1.33E-04 | 2.21E-03 | 2.2          | 3.8          |            |                |      |          |       |     | 2.12  | DnaJ (Hsp40) homolog, subfamily B, member 13                                  | 1.06E-08 | Y        |          |          |
| <i>Slit3</i>        | 1.42  | 1.34E-04 | 2.21E-03 | 13.6         | 19.3         |            | 1              |      |          |       |     | 1.76  | slit homolog 3 (Drosophila)                                                   | 3.60E-11 | Y        |          |          |
| <i>Ptpn14</i>       | 1.62  | 1.35E-04 | 2.23E-03 | 1.9          | 3.1          |            |                |      |          |       |     | 2.10  | protein tyrosine phosphatase, non-receptor type 14                            | 1.14E-10 | Y        |          |          |
| <i>Tmem14a</i>      | -1.45 | 1.35E-04 | 2.23E-03 | 42.3         | 29.1         |            | 3              |      |          |       |     | -1.52 | transmembrane protein 14A                                                     | 2.30E-06 | Y        |          |          |
| <i>Tmem90a</i>      | -1.59 | 1.37E-04 | 2.25E-03 | 8.5          | 5.4          |            |                |      |          |       |     | -1.52 |                                                                               | 5.04E-04 | Y        |          |          |
| <i>Syt7</i>         | 1.41  | 1.38E-04 | 2.27E-03 | 58.0         | 81.8         |            |                |      |          |       |     | 1.66  | synaptotagmin VII                                                             | 1.80E-09 | Y        |          |          |
| <i>Ccdc33</i>       | 1.76  | 1.40E-04 | 2.29E-03 | 1.5          | 2.6          |            |                |      |          |       |     | 2.06  | coiled-coil domain containing 33                                              | 4.06E-07 | Y        |          |          |
| <i>Xkr7</i>         | 1.46  | 1.42E-04 | 2.32E-03 | 10.4         | 15.1         |            |                |      |          |       |     | 2.42  | XK, Kell blood group complex subunit-related family, member 7                 | 8.54E-18 | Y        |          |          |
| <i>Tspan4</i>       | 1.43  | 1.43E-04 | 2.34E-03 | 31.1         | 44.5         |            | 1              |      | 1        |       |     | 1.71  | tetraspanin 4                                                                 | 9.79E-09 | Y        |          |          |

Supplementary Table 1

| gene              | FC    | Pvalue   | FDR      | control RPKM | alcohol RPKM | P drinking | P vs. NP naïve | GWAS | GE in PM | AcbSh | CeA | DRN   | gene title                                                                                 | DRN FDR  | same dir | PAG+ ACB | PAG+ CeA |
|-------------------|-------|----------|----------|--------------|--------------|------------|----------------|------|----------|-------|-----|-------|--------------------------------------------------------------------------------------------|----------|----------|----------|----------|
| <i>Gria4</i>      | 1.38  | 1.45E-04 | 2.37E-03 | 129.1        | 178.8        |            |                | 1    | 1        |       |     | 1.31  | glutamate receptor, ionotropic, AMPA 4                                                     | 1.10E-03 | Y        |          |          |
| <i>Rasa3</i>      | 1.41  | 1.47E-04 | 2.39E-03 | 30.1         | 42.5         |            |                |      |          |       |     | 1.64  | RAS p21 protein activator 3                                                                | 7.73E-09 | Y        |          |          |
| <i>Grin3a</i>     | -1.42 | 1.48E-04 | 2.41E-03 | 19.7         | 13.9         | 1          |                |      |          |       |     | -1.39 | glutamate receptor, ionotropic, N-methyl-D-aspartate 3A                                    | 1.75E-04 | Y        |          |          |
| <i>Adora1</i>     | 1.40  | 1.48E-04 | 2.41E-03 | 95.2         | 133.7        |            |                |      | 1        |       |     | 1.68  | adenosine A1 receptor                                                                      | 5.51E-10 | Y        |          |          |
| <i>St18</i>       | 1.40  | 1.49E-04 | 2.42E-03 | 33.4         | 46.7         |            |                | 1    | 2        |       |     | 2.27  | suppression of tumorigenicity 18 (breast carcinoma) (zinc finger pr                        | 3.89E-24 | Y        |          |          |
| <i>Ncam2</i>      | -1.39 | 1.51E-04 | 2.44E-03 | 79.7         | 57.3         | 1          |                | 2    | 1        |       |     | -1.39 | neural cell adhesion molecule 2                                                            | 5.23E-05 | Y        |          |          |
| <i>Grin2b</i>     | -1.41 | 1.51E-04 | 2.45E-03 | 21.7         | 15.4         |            |                |      | 1        |       |     | -1.56 | glutamate receptor, ionotropic, N-methyl D-aspartate 2B //                                 | 6.62E-08 | Y        |          |          |
| <i>Lrrtm4</i>     | -1.44 | 1.55E-04 | 2.50E-03 | 19.0         | 13.1         |            |                |      |          |       |     | -1.47 | leucine rich repeat transmembrane neuronal 4                                               | 1.32E-05 | Y        |          |          |
| <i>Btg1</i>       | 1.39  | 1.56E-04 | 2.53E-03 | 119.3        | 166.1        | 1          | 1              |      |          |       |     | 2.06  | B-cell translocation gene 1, anti-proliferative progesterone receptor membrane component 1 | 8.29E-20 | Y        |          |          |
| <i>Pgrmc1</i>     | -1.40 | 1.57E-04 | 2.53E-03 | 96.0         | 68.7         |            |                |      |          |       |     | -1.67 |                                                                                            | 5.89E-11 | Y        |          |          |
| <i>LOC502684</i>  | 1.55  | 1.61E-04 | 2.59E-03 | 9.1          | 14.0         |            |                |      |          |       |     | 1.56  |                                                                                            | 8.69E-05 | Y        |          |          |
| <i>Tagln3</i>     | 1.39  | 1.61E-04 | 2.60E-03 | 163.1        | 226.8        |            | 1              |      |          |       |     | 1.43  | transgelin 3                                                                               | 1.73E-05 | Y        |          |          |
| <i>Hs3st5</i>     | -1.55 | 1.62E-04 | 2.60E-03 | 6.0          | 3.9          |            |                | 1    | 1        |       |     | -1.74 | heparan sulfate (glucosamine) 3-O-sulfotransferase 5                                       | 3.35E-08 | Y        |          |          |
| <i>Insc</i>       | -1.65 | 1.62E-04 | 2.61E-03 | 4.7          | 2.9          |            |                |      |          |       |     |       | inscuteable homolog (Drosophila)                                                           | 1.20E-01 | N        |          |          |
| <i>lqgap3</i>     | -1.77 | 1.64E-04 | 2.62E-03 | 1.2          | 0.7          |            | 1              |      |          |       |     | -1.76 | IQ motif containing GTPase activating protein 3                                            | 4.09E-06 | Y        |          |          |
| <i>Fat3</i>       | -1.39 | 1.67E-04 | 2.67E-03 | 23.3         | 16.8         |            |                |      |          |       |     | -1.42 | FAT tumor suppressor homolog 3 (Drosophila)                                                | 1.66E-05 | Y        |          |          |
| <i>Sema3d</i>     | -1.47 | 1.68E-04 | 2.68E-03 | 7.1          | 4.9          |            |                |      | 1        |       |     | -1.24 | sema domain, immunoglobulin domain (Ig), short basic domain, secr                          | 4.64E-02 | Y        |          |          |
| <i>RGD1309079</i> | 1.39  | 1.70E-04 | 2.71E-03 | 44.6         | 62.0         |            |                |      |          |       |     | 1.77  |                                                                                            | 8.03E-13 | Y        |          |          |
| <i>Zfp238</i>     | 1.40  | 1.71E-04 | 2.73E-03 | 59.8         | 83.8         |            |                |      |          |       |     | 3.16  |                                                                                            | 1.45E-42 | Y        |          |          |
| <i>Mctp2</i>      | -1.80 | 1.72E-04 | 2.74E-03 | 2.5          | 1.4          |            |                |      |          |       |     |       | multiple C2 domains, transmembrane 2                                                       | 9.04E-01 | N        |          |          |
| <i>LOC690276</i>  | 1.67  | 1.75E-04 | 2.78E-03 | 6.5          | 10.9         |            |                |      |          |       |     | 2.05  |                                                                                            | 9.30E-08 | Y        |          |          |
| <i>Msx2</i>       | 1.73  | 1.76E-04 | 2.79E-03 | 2.3          | 4.0          |            |                |      |          |       |     | 3.46  | msh homeobox 2                                                                             | 8.63E-13 | Y        |          |          |
| <i>Hdac11</i>     | -1.38 | 1.77E-04 | 2.81E-03 | 130.6        | 94.4         |            |                |      |          |       |     | -1.39 | histone deacetylase 11                                                                     | 4.78E-05 | Y        |          |          |
| <i>Pcdh20</i>     | -1.42 | 1.78E-04 | 2.82E-03 | 12.9         | 9.0          | 1          | 2              |      |          |       |     |       | protocadherin 20                                                                           | 5.11E-02 | N        |          |          |
| <i>Aloxe3</i>     | 1.42  | 1.82E-04 | 2.88E-03 | 20.7         | 29.4         |            | 2              |      |          |       |     | 1.64  | arachidonate lipoxygenase 3                                                                | 5.60E-08 | Y        |          |          |
| <i>Ndrgr1</i>     | -1.39 | 1.83E-04 | 2.88E-03 | 70.3         | 50.6         |            | 1              |      |          |       |     | -1.35 | N-myc downstream regulated 1                                                               | 3.82E-04 | Y        |          |          |
| <i>Dnaja1</i>     | -1.40 | 1.83E-04 | 2.89E-03 | 78.6         | 56.1         |            |                |      | 1        |       |     |       | DnaJ (Hsp40) homolog, subfamily A, member 1                                                | 1.36E-01 | N        |          |          |
| <i>Mchr1</i>      | -1.91 | 1.83E-04 | 2.89E-03 | 4.1          | 2.2          |            |                |      |          |       |     | -1.50 | melanin-concentrating hormone receptor 1                                                   | 2.98E-03 | Y        |          |          |
| <i>Hs3st1</i>     | 1.43  | 1.84E-04 | 2.90E-03 | 46.2         | 65.9         |            | 2              |      | 2        |       |     | 1.55  | heparan sulfate (glucosamine) 3-O-sulfotransferase 1                                       | 2.44E-06 | Y        |          |          |
| <i>Rab11a</i>     | -1.38 | 1.85E-04 | 2.90E-03 | 119.2        | 86.1         |            |                |      |          |       |     | -1.44 | RAB11A, member RAS oncogene family                                                         | 5.86E-06 | Y        |          |          |
| <i>Car2</i>       | -1.39 | 1.85E-04 | 2.90E-03 | 152.9        | 110.2        |            |                |      |          |       |     | -1.33 | carbonic anhydrase II                                                                      | 8.87E-04 | Y        |          |          |
| <i>Fbxl22</i>     | 1.91  | 1.85E-04 | 2.90E-03 | 0.6          | 1.1          |            |                |      |          |       |     | 2.82  | F-box and leucine-rich repeat protein 22                                                   | 2.13E-05 | Y        |          |          |
| <i>Tmprss5</i>    | -1.57 | 1.87E-04 | 2.93E-03 | 6.4          | 4.1          |            |                |      |          |       |     | -1.42 | transmembrane protease, serine 5                                                           | 2.68E-03 | Y        |          |          |
| <i>Gas2</i>       | -1.61 | 1.87E-04 | 2.93E-03 | 6.0          | 3.7          |            |                |      |          |       |     | -1.59 | growth arrest-specific 2                                                                   | 9.56E-05 | Y        |          |          |
| <i>Rnf39</i>      | 1.65  | 1.90E-04 | 2.96E-03 | 3.1          | 5.0          |            | 1              |      |          |       |     | 2.30  | ring finger protein 39                                                                     | 3.62E-06 | Y        |          |          |
| <i>Lcp1</i>       | -1.50 | 1.92E-04 | 3.00E-03 | 7.1          | 4.7          |            |                |      | 1        |       |     | -1.29 | lymphocyte cytosolic protein 1 (L-plastin)                                                 | 1.33E-02 | Y        |          |          |
| <i>Etv1</i>       | 1.38  | 1.96E-04 | 3.05E-03 | 75.7         | 104.2        | 1          | 3              |      | 1        | -1.14 |     | 3.33  | ets variant 1                                                                              | 8.43E-55 | Y        | N        |          |

Supplementary Table 1

| gene                | FC    | Pvalue   | FDR      | control RPKM | alcohol RPKM | P drinking | P vs. NP naïve | GWAS | GE in PM | AcbSh | CeA | DRN   | gene title                                                                                                       | DRN FDR  | same dir | PAG+ ACB | PAG+ CeA |
|---------------------|-------|----------|----------|--------------|--------------|------------|----------------|------|----------|-------|-----|-------|------------------------------------------------------------------------------------------------------------------|----------|----------|----------|----------|
| <i>Ptms</i>         | 1.39  | 1.98E-04 | 3.07E-03 | 120.5        | 167.6        |            |                |      |          |       |     |       | parathymosin                                                                                                     | 5.33E-02 | N        |          |          |
| <i>Tac1</i>         | -1.42 | 1.98E-04 | 3.08E-03 | 69.7         | 49.2         |            | 1              |      |          |       |     |       | tachykinin, precursor 1                                                                                          | 3.71E-01 | N        |          |          |
| <i>Plvap</i>        | 1.59  | 2.00E-04 | 3.11E-03 | 4.3          | 6.9          |            | 1              |      |          |       |     | 1.93  | plasmalemma vesicle associated protein                                                                           | 5.30E-06 | Y        |          |          |
| <i>Mylk3</i>        | -4.62 | 2.04E-04 | 3.16E-03 | 0.4          | 0.1          |            |                |      |          |       |     |       | myosin light chain kinase 3                                                                                      | 0.00E+00 | N        |          |          |
| <i>Fam161a</i>      | 1.56  | 2.04E-04 | 3.16E-03 | 5.1          | 8.0          |            |                |      |          |       |     | 1.72  | family with sequence similarity 161, member A                                                                    | 1.95E-06 | Y        |          |          |
| <i>Insig1</i>       | -1.41 | 2.05E-04 | 3.16E-03 | 31.6         | 22.4         |            | 1              |      | 1        |       |     | -1.46 | insulin induced gene 1                                                                                           | 9.84E-06 | Y        |          |          |
| <i>LOC100125362</i> | -1.39 | 2.05E-04 | 3.16E-03 | 28.8         | 20.7         |            |                |      |          |       |     | -1.24 |                                                                                                                  | 1.41E-02 | Y        |          |          |
| <i>Plat</i>         | 1.39  | 2.05E-04 | 3.16E-03 | 55.9         | 77.6         | 1          |                |      |          |       |     | -1.32 | 1.50 plasminogen activator, tissue                                                                               | 5.13E-07 | Y        |          | N        |
| <i>Sorl1</i>        | 1.37  | 2.06E-04 | 3.16E-03 | 90.3         | 124.0        |            |                |      |          |       |     | 1.87  | sortilin-related receptor, L(DLR class) A repeats containing                                                     | 2.94E-16 | Y        |          |          |
| <i>Dock11</i>       | -1.41 | 2.06E-04 | 3.16E-03 | 12.3         | 8.7          |            | 1              |      |          |       |     | -1.36 | dedicator of cytokinesis 11                                                                                      | 3.89E-04 | Y        |          |          |
| <i>Mcrs1</i>        | 1.40  | 2.06E-04 | 3.16E-03 | 35.8         | 50.3         |            |                |      |          |       |     | 1.30  | microspherule protein 1                                                                                          | 3.76E-03 | Y        |          |          |
| <i>Asap1</i>        | -1.40 | 2.07E-04 | 3.17E-03 | 37.0         | 26.5         |            |                | 1    |          |       |     | -1.27 | ArfGAP with SH3 domain, ankyrin repeat and PH domain 1                                                           | 5.79E-03 | Y        |          |          |
| <i>Pdk2</i>         | 1.38  | 2.07E-04 | 3.17E-03 | 79.6         | 110.1        |            |                |      | 1        |       |     | 1.65  | pyruvate dehydrogenase kinase, isozyme 2                                                                         | 5.82E-10 | Y        |          |          |
| <i>Azi1</i>         | 1.42  | 2.09E-04 | 3.20E-03 | 13.3         | 18.9         |            |                |      |          |       |     | 1.36  | 5-azacytidine induced 1                                                                                          | 9.78E-04 | Y        |          |          |
| <i>Cpm</i>          | -1.46 | 2.11E-04 | 3.22E-03 | 6.2          | 4.2          |            |                | 1    |          |       |     | -1.32 | carboxypeptidase M                                                                                               | 7.78E-03 | Y        |          |          |
| <i>Sox10</i>        | -1.42 | 2.12E-04 | 3.24E-03 | 20.3         | 14.2         |            | 1              |      |          |       |     |       | SRY (sex determining region Y)-box 10                                                                            | 8.41E-02 | N        |          |          |
| <i>Lrfn5</i>        | -1.54 | 2.13E-04 | 3.24E-03 | 5.8          | 3.8          |            |                |      |          |       |     | -1.54 | leucine rich repeat and fibronectin type III domain containing 5 / protein phosphatase 1, regulatory subunit 15A | 5.67E-05 | Y        |          |          |
| <i>Ppp1r15a</i>     | 1.46  | 2.16E-04 | 3.30E-03 | 12.2         | 17.8         |            |                |      |          |       |     | 2.76  | mab-21-like 1 (C. elegans)                                                                                       | 2.75E-01 | N        |          |          |
| <i>Mab21l1</i>      | 1.43  | 2.17E-04 | 3.31E-03 | 16.3         | 23.2         |            |                |      |          |       |     |       |                                                                                                                  | 9.16E-25 | Y        |          |          |
| <i>Kcnp3</i>        | 1.44  | 2.19E-04 | 3.33E-03 | 34.3         | 49.5         |            |                |      | 1        |       |     | 1.71  | Kv channel interacting protein 3, calsenilin potassium voltage-gated channel, Shab-related subfamily, member 2   | 4.25E-08 | Y        |          |          |
| <i>Kcnc2</i>        | -1.43 | 2.20E-04 | 3.33E-03 | 15.3         | 10.7         |            |                |      |          |       |     | 1.67  | chromodomain protein, Y-like                                                                                     | 6.34E-01 | N        |          |          |
| <i>Cdyl</i>         | 1.40  | 2.20E-04 | 3.33E-03 | 39.1         | 54.6         |            |                |      |          |       |     | 1.75  |                                                                                                                  | 5.88E-10 | Y        |          |          |
| <i>LOC314655</i>    | 1.47  | 2.24E-04 | 3.39E-03 | 10.2         | 15.0         |            |                |      |          |       |     |       |                                                                                                                  | 3.56E-08 | Y        |          |          |
| <i>Eif1a</i>        | -1.44 | 2.25E-04 | 3.39E-03 | 26.1         | 18.2         |            |                |      |          |       |     | -1.31 | eukaryotic translation initiation factor 1A, Y-linked; eukaryotic translation initiation factor 1A               | 3.40E-03 | Y        |          |          |
| <i>Penk</i>         | -1.39 | 2.25E-04 | 3.40E-03 | 99.0         | 71.2         |            | 1              |      |          |       |     |       | proenkephalin                                                                                                    | 9.12E-01 | N        |          |          |
| <i>Dhx16</i>        | 1.40  | 2.27E-04 | 3.42E-03 | 28.9         | 40.3         |            |                |      |          |       |     | 1.53  | DEAH (Asp-Glu-Ala-His) box polypeptide 16                                                                        | 7.75E-07 | Y        |          |          |
| <i>Hspa1a</i>       | 1.56  | 2.28E-04 | 3.43E-03 | 4.0          | 6.2          |            |                |      | 1        |       |     | 1.48  | heat shock 70kDa protein 1A                                                                                      | 4.00E-04 | Y        |          |          |
| <i>Dqx1</i>         | 1.56  | 2.28E-04 | 3.43E-03 | 3.7          | 5.8          |            |                |      |          |       |     | 1.64  | DEAQ box RNA-dependent ATPase 1                                                                                  | 7.04E-05 | Y        |          |          |
| <i>Clip4</i>        | -1.45 | 2.29E-04 | 3.43E-03 | 19.6         | 13.6         |            |                |      |          |       |     | -1.30 | CAP-GLY domain containing linker protein family, member 4                                                        | 8.89E-03 | Y        |          |          |
| <i>Usp3</i>         | 1.42  | 2.30E-04 | 3.45E-03 | 22.0         | 31.1         |            |                |      |          |       |     | 2.30  | ubiquitin specific peptidase 3                                                                                   | 4.83E-20 | Y        |          |          |
| <i>Il1rapl2</i>     | -1.76 | 2.32E-04 | 3.48E-03 | 2.1          | 1.2          |            |                |      |          |       |     | -1.58 | interleukin 1 receptor accessory protein-like 2                                                                  | 1.83E-03 | Y        |          |          |
| <i>S100a4</i>       | 3.00  | 2.35E-04 | 3.52E-03 | 1.2          | 3.5          |            | 1              |      |          |       |     | 3.15  | S100 calcium binding protein A4                                                                                  | 3.07E-05 | Y        |          |          |
| <i>Rapgef5</i>      | -1.39 | 2.35E-04 | 3.52E-03 | 21.2         | 15.2         |            |                | 1    | 1        |       |     | -1.51 | Rap guanine nucleotide exchange factor (GEF) 5                                                                   | 6.45E-07 | Y        |          |          |
| <i>Cyth3</i>        | 1.40  | 2.36E-04 | 3.52E-03 | 20.0         | 28.0         |            |                |      |          |       |     | 1.41  | cytohesin 3                                                                                                      | 8.31E-05 | Y        |          |          |
| <i>Ptgds</i>        | 1.38  | 2.36E-04 | 3.52E-03 | 308.5        | 424.8        |            |                |      | 1        |       |     | 1.63  | prostaglandin D2 synthase 21kDa (brain)                                                                          | 4.63E-10 | Y        |          |          |
| <i>Mxd4</i>         | 1.43  | 2.37E-04 | 3.53E-03 | 28.1         | 40.2         |            |                |      |          |       |     | 1.69  | MAX dimerization protein 4                                                                                       | 4.07E-08 | Y        |          |          |

Supplementary Table 1

| gene              | FC    | Pvalue   | FDR      | control RPKM | alcohol RPKM | P drinking | P vs. NP naïve | GWAS | GE in PM | AcbSh | CeA | DRN   | gene title                                                       | DRN FDR  | same dir | PAG+ ACB | PAG+ CeA |
|-------------------|-------|----------|----------|--------------|--------------|------------|----------------|------|----------|-------|-----|-------|------------------------------------------------------------------|----------|----------|----------|----------|
| <i>Solh</i>       | 1.39  | 2.38E-04 | 3.54E-03 | 19.4         | 26.9         |            |                |      |          |       |     | 1.57  | small optic lobes homolog (Drosophila)                           | 8.20E-08 | Y        |          |          |
| <i>Snx2</i>       | -1.41 | 2.38E-04 | 3.54E-03 | 36.5         | 25.9         |            |                |      |          |       |     |       | sorting nexin 2                                                  | 3.34E-01 | N        |          |          |
| <i>Olfml1</i>     | -1.42 | 2.39E-04 | 3.54E-03 | 22.3         | 15.7         |            | 1              |      |          |       |     | -1.31 | olfactomedin-like 1                                              | 3.25E-03 | Y        |          |          |
| <i>Nhs</i>        | -1.48 | 2.39E-04 | 3.55E-03 | 4.9          | 3.3          |            |                |      |          |       |     | -1.44 | Nance-Horan syndrome (congenital cataracts and dental anomalies) | 3.05E-04 | Y        |          |          |
| <i>Zfp653</i>     | 1.45  | 2.42E-04 | 3.57E-03 | 11.5         | 16.7         |            |                |      |          |       |     | 1.64  |                                                                  | 7.44E-07 | Y        |          |          |
| <i>Ntsr1</i>      | -1.81 | 2.42E-04 | 3.57E-03 | 1.6          | 0.9          |            | 1              |      |          |       |     | -1.43 | neurotensin receptor 1 (high affinity)                           | 8.65E-03 | Y        |          |          |
| <i>Elov17</i>     | -1.52 | 2.44E-04 | 3.60E-03 | 17.4         | 11.5         |            |                |      | 1        |       |     | -1.35 | ELOVL fatty acid elongase 7                                      | 9.80E-03 | Y        |          |          |
| <i>Atpaf1</i>     | -1.40 | 2.47E-04 | 3.64E-03 | 26.4         | 18.8         |            |                |      |          |       |     |       | ATP synthase mitochondrial F1 complex assembly factor 1 //       | 1.53E-01 | N        |          |          |
| <i>Scn1a</i>      | -1.37 | 2.48E-04 | 3.65E-03 | 85.6         | 62.6         |            | 1              |      |          |       |     |       | sodium channel, voltage-gated, type I, alpha subunit             | 1.01E-01 | N        |          |          |
| <i>Gldc</i>       | 1.45  | 2.49E-04 | 3.66E-03 | 6.9          | 10.1         |            | 1              |      |          |       |     | 1.81  | glycine dehydrogenase (decarboxylating)                          | 1.20E-09 | Y        |          |          |
| <i>Nek7</i>       | -1.42 | 2.49E-04 | 3.66E-03 | 68.4         | 48.3         |            |                |      |          |       |     | -1.39 | NIMA (never in mitosis gene a)-related kinase 7                  | 3.35E-04 | Y        |          |          |
| <i>Ugt1a6</i>     | -1.64 | 2.50E-04 | 3.67E-03 | 4.2          | 2.6          |            |                |      |          |       |     |       |                                                                  | 3.62E-01 | N        |          |          |
| <i>Septin5</i>    | 1.38  | 2.50E-04 | 3.67E-03 | #N/A         | #N/A         |            |                |      | 1        |       |     | 1.17  |                                                                  | #N/A     | Y        |          |          |
| <i>Chrm3</i>      | -1.41 | 2.52E-04 | 3.69E-03 | 16.9         | 12.0         |            | 1              |      |          |       |     |       | cholinergic receptor, muscarinic 3                               | 7.20E-02 | N        |          |          |
| <i>RGD1566112</i> | 1.41  | 2.53E-04 | 3.69E-03 | 14.4         | 20.3         |            |                |      |          |       |     | 1.81  |                                                                  | 1.61E-11 | Y        |          |          |
| <i>C8g</i>        | -1.67 | 2.56E-04 | 3.74E-03 | 12.3         | 7.4          |            |                |      |          |       |     |       | complement component 8, gamma polypeptide                        | 9.79E-01 | N        |          |          |
| <i>Pnck</i>       | -1.41 | 2.57E-04 | 3.75E-03 | 43.8         | 31.1         |            |                |      |          |       |     | -1.60 | pregnancy up-regulated non-ubiquitously expressed CaM kinase     | 6.62E-08 | Y        |          |          |
| <i>Pcdh19</i>     | -1.38 | 2.58E-04 | 3.75E-03 | 37.1         | 26.8         |            |                |      |          |       |     | -1.37 | protocadherin 19                                                 | 2.40E-04 | Y        |          |          |
| <i>Aox3</i>       | -1.69 | 2.58E-04 | 3.75E-03 | 1.8          | 1.1          |            |                |      |          |       |     |       | aldehyde oxidase 3                                               | 2.17E-01 | N        |          |          |
| <i>Sfxn5</i>      | 1.39  | 2.59E-04 | 3.77E-03 | 99.1         | 137.9        |            |                |      |          |       |     | 1.50  | sideroflexin 5                                                   | 1.89E-06 | Y        |          |          |
| <i>Lrrn1</i>      | -1.40 | 2.60E-04 | 3.77E-03 | 28.8         | 20.6         |            |                |      |          |       |     |       | leucine rich repeat neuronal 1                                   | 5.89E-01 | N        |          |          |
| <i>Als2cr12</i>   | 1.54  | 2.60E-04 | 3.77E-03 | 6.1          | 9.4          |            |                | 1    |          |       |     | 2.17  | amyotrophic lateral sclerosis 2 (juvenile) chromosome region, c  | 1.86E-12 | Y        |          |          |
| <i>Rabl4</i>      | 1.49  | 2.61E-04 | 3.77E-03 | 16.0         | 23.8         |            |                |      |          |       |     | 1.62  |                                                                  | 7.12E-06 | Y        |          |          |
| <i>Serinc2</i>    | 1.73  | 2.61E-04 | 3.78E-03 | 2.3          | 4.0          |            |                | 1    | 1        |       |     | 2.92  | serine incorporator 2                                            | 3.73E-12 | Y        |          |          |
| <i>Sncg</i>       | -1.51 | 2.63E-04 | 3.79E-03 | 29.1         | 19.3         |            | 1              |      |          |       |     | -1.75 | synuclein, gamma (breast cancer-specific protein 1)              | 1.43E-11 | Y        |          |          |
| <i>Hapln2</i>     | -1.52 | 2.65E-04 | 3.83E-03 | 13.9         | 9.2          |            | 1              |      |          |       |     | -1.42 | hyaluronan and proteoglycan link protein 2                       | 2.70E-03 | Y        |          |          |
| <i>Katnal1</i>    | -1.41 | 2.67E-04 | 3.85E-03 | 41.4         | 29.4         |            |                |      |          |       |     |       | katanin p60 subunit A-like 1                                     | 6.32E-02 | N        |          |          |
| <i>March1</i>     | -1.62 | 2.67E-04 | 3.85E-03 | 12.1         | 7.5          |            |                | 1    |          |       |     | -1.40 |                                                                  | 1.60E-02 | Y        |          |          |
| <i>Cd22</i>       | -3.28 | 2.71E-04 | 3.89E-03 | 0.4          | 0.1          |            |                | 1    | 2        |       |     |       | CD22 molecule                                                    | 0.00E+00 | N        |          |          |
| <i>Snrk</i>       | 1.38  | 2.73E-04 | 3.92E-03 | 57.3         | 79.0         |            |                |      |          |       |     | 1.74  | SNF related kinase                                               | 9.84E-06 | Y        |          |          |
| <i>Lrsam1</i>     | -1.39 | 2.74E-04 | 3.93E-03 | 20.9         | 15.0         |            | 1              |      |          |       |     | -1.31 | leucine rich repeat and sterile alpha motif containing 1         | 2.38E-03 | Y        |          |          |
| <i>Thsd7b</i>     | -1.45 | 2.78E-04 | 3.97E-03 | 6.5          | 4.5          |            | 2              | 2    |          |       |     | -1.41 | thrombospondin, type I, domain containing 7B                     | 1.21E-04 | Y        |          |          |
| <i>Ptprk</i>      | -1.43 | 2.78E-04 | 3.97E-03 | 21.0         | 14.7         | 1          |                | 1    | 1        |       |     |       | protein tyrosine phosphatase, receptor type, K                   | 8.19E-01 | N        |          |          |
| <i>Mgll</i>       | 1.42  | 2.78E-04 | 3.97E-03 | 31.2         | 44.3         | 2          | 2              |      |          |       |     | 1.39  | monoglyceride lipase                                             | 4.90E-04 | Y        |          |          |
| <i>Pdzd2</i>      | -1.47 | 2.78E-04 | 3.97E-03 | 3.4          | 2.3          |            |                | 1    |          |       |     |       | PDZ domain containing 2                                          | 1.00E+00 | N        |          |          |
| <i>St6gal1</i>    | -1.43 | 2.79E-04 | 3.97E-03 | 12.0         | 8.4          | 1          | 1              |      |          |       |     | -1.29 | ST6 beta-galactosamide alpha-2,6-sialyltransferase 1             | 9.06E-03 | Y        |          |          |
| <i>Rtn4</i>       | -1.36 | 2.82E-04 | 4.02E-03 | 221.3        | 162.4        |            |                |      | 1        |       |     | -1.40 | reticulon 4                                                      | 2.86E-05 | Y        |          |          |

Supplementary Table 1

| gene             | FC    | Pvalue   | FDR      | control RPKM | alcohol RPKM | P drinking | P vs. NP naïve | GWAS | GE in PM | AcbSh | CeA   | DRN   | gene title                                                                                     | DRN FDR  | same dir | PAG+ ACB | PAG+ CeA |
|------------------|-------|----------|----------|--------------|--------------|------------|----------------|------|----------|-------|-------|-------|------------------------------------------------------------------------------------------------|----------|----------|----------|----------|
| <i>Tanc2</i>     | -1.37 | 2.84E-04 | 4.04E-03 | 48.9         | 35.8         |            |                |      |          |       |       | -1.34 | tetratricopeptide repeat, ankyrin repeat and coiled-coil co                                    | 4.91E-04 | Y        |          |          |
| <i>Rsph1</i>     | 1.60  | 2.84E-04 | 4.04E-03 | 7.5          | 11.9         |            |                |      |          |       |       | 2.40  | radial spoke head 1 homolog (Chlamydomonas)                                                    | 9.66E-14 | Y        |          |          |
| <i>Tmtc2</i>     | 1.39  | 2.86E-04 | 4.06E-03 | 29.1         | 40.4         |            |                | 1    |          |       |       | 1.58  | transmembrane and tetratricopeptide repeat containing 2                                        | 7.76E-08 | Y        |          |          |
| <i>Ifitm3</i>    | 1.55  | 2.87E-04 | 4.06E-03 | 16.5         | 25.5         | 1          | 2              |      | 1        |       |       | 1.83  | interferon induced transmembrane protein 3 pleckstrin homology-like domain, family A, member 3 | 1.37E-07 | Y        |          |          |
| <i>Phlda3</i>    | -1.43 | 2.87E-04 | 4.06E-03 | 32.1         | 22.5         |            | 1              |      |          |       |       | -1.42 |                                                                                                | 1.45E-04 | Y        |          |          |
| <i>Zbtb17</i>    | 1.44  | 2.87E-04 | 4.06E-03 | 9.7          | 14.0         |            |                |      |          |       |       | 1.30  | zinc finger and BTB domain containing 17                                                       | 1.39E-02 | Y        |          |          |
| <i>Zhx3</i>      | 1.37  | 2.89E-04 | 4.09E-03 | 50.9         | 69.8         |            |                |      |          |       |       | 1.38  | zinc fingers and homeoboxes 3                                                                  | 1.10E-04 | Y        |          |          |
| <i>LOC361016</i> | -1.59 | 2.92E-04 | 4.12E-03 | 6.0          | 3.8          |            |                |      |          |       |       |       |                                                                                                | 6.88E-01 | N        |          |          |
| <i>Gjb1</i>      | -1.50 | 2.93E-04 | 4.13E-03 | 13.7         | 9.1          |            | 1              |      | 2        |       |       | -1.30 | gap junction protein, beta 1, 32kDa                                                            | 3.30E-02 | Y        |          |          |
| <i>Apbb1ip</i>   | -1.83 | 2.95E-04 | 4.14E-03 | 2.2          | 1.2          |            |                |      |          |       |       |       | amyloid beta (A4) precursor protein-binding, family B, member 1                                | 6.98E-01 | N        |          |          |
| <i>Fam101b</i>   | 1.56  | 2.95E-04 | 4.14E-03 | 6.5          | 10.1         |            | 3              |      |          |       |       | 1.38  | family with sequence similarity 101, member B                                                  | 1.33E-02 | Y        |          |          |
| <i>Depdc7</i>    | -1.60 | 3.01E-04 | 4.23E-03 | 7.3          | 4.5          |            |                |      |          |       |       |       | DEP domain containing 7                                                                        | 5.22E-01 | N        |          |          |
| <i>Elovl6</i>    | -1.40 | 3.04E-04 | 4.27E-03 | 35.6         | 25.5         | 2          | 1              |      |          |       | -1.13 | -1.37 | ELOVL fatty acid elongase 6                                                                    | 2.97E-04 | Y        | Y        |          |
| <i>Ass1</i>      | -1.43 | 3.05E-04 | 4.28E-03 | 35.3         | 24.7         |            | 1              |      |          |       |       | -1.53 | argininosuccinate synthase 1                                                                   | 9.98E-07 | Y        |          |          |
| <i>Masp1</i>     | -1.47 | 3.06E-04 | 4.28E-03 | 5.1          | 3.4          | 1          | 1              |      |          |       |       |       | mannan-binding lectin serine peptidase 1 (C4/C2 activating)                                    | 5.11E-01 | N        |          |          |
| <i>MGC114440</i> | 1.50  | 3.09E-04 | 4.33E-03 | 6.4          | 9.5          |            |                |      |          |       |       | 1.94  |                                                                                                | 1.17E-10 | Y        |          |          |
| <i>Rassf2</i>    | 1.39  | 3.13E-04 | 4.37E-03 | 24.7         | 34.2         |            |                |      | 1        |       |       | 1.63  | Ras association (RalGDS/AF-6) domain family member 2                                           | 3.65E-09 | Y        |          |          |
| <i>Aifm3</i>     | 1.37  | 3.14E-04 | 4.38E-03 | 53.6         | 73.6         | 1          |                |      |          |       |       | 1.65  | apoptosis-inducing factor, mitochondrion-associated, 3                                         | 8.11E-10 | Y        |          |          |
| <i>Acyp2</i>     | -1.47 | 3.16E-04 | 4.40E-03 | 19.3         | 13.1         | 1          | 1              |      |          |       | -1.37 | -1.23 | acylphosphatase 2, muscle type                                                                 | 1.68E-02 | Y        | Y        |          |
| <i>Akna</i>      | 1.42  | 3.24E-04 | 4.51E-03 | 6.1          | 8.6          |            |                |      |          |       |       | 1.65  | AT-hook transcription factor                                                                   | 4.70E-08 | Y        |          |          |
| <i>Mum111</i>    | -1.49 | 3.25E-04 | 4.52E-03 | 5.9          | 4.0          |            |                |      |          |       |       | -1.77 | melanoma associated antigen (mutated) 1-like 1                                                 | 6.39E-10 | Y        |          |          |
| <i>Spag6</i>     | 1.41  | 3.29E-04 | 4.57E-03 | 19.9         | 28.0         |            |                |      |          |       |       | 1.87  | sperm associated antigen 6                                                                     | 2.21E-13 | Y        |          |          |
| <i>Rps6</i>      | -1.36 | 3.30E-04 | 4.57E-03 | 444.3        | 325.8        |            |                |      |          |       |       | -1.52 | ribosomal protein S6                                                                           | 9.00E-08 | Y        |          |          |
| <i>Hcn2</i>      | -1.37 | 3.30E-04 | 4.58E-03 | 63.2         | 46.0         |            |                |      |          |       |       |       | hyperpolarization activated cyclic nucleotide-gated potassium chann                            | 7.51E-01 | N        |          |          |
| <i>Rpe65</i>     | -1.48 | 3.33E-04 | 4.60E-03 | 12.9         | 8.7          | 1          | 1              |      |          |       |       | -1.35 | retinal pigment epithelium-specific protein 65kDa                                              | 3.80E-03 | Y        |          |          |
| <i>Meis2</i>     | -1.42 | 3.33E-04 | 4.60E-03 | 18.5         | 13.0         |            | 1              |      |          |       |       |       | Meis homeobox 2                                                                                | 8.28E-01 | N        |          |          |
| <i>Sycp2</i>     | -1.59 | 3.34E-04 | 4.61E-03 | 2.4          | 1.5          |            |                |      |          |       |       |       | synaptonemal complex protein 2                                                                 | 1.29E-01 | N        |          |          |
| <i>Sult1d1</i>   | -1.55 | 3.36E-04 | 4.63E-03 | 7.0          | 4.5          |            | 1              |      |          |       |       | -1.55 |                                                                                                | 1.99E-04 | Y        |          |          |
| <i>Bmp7</i>      | 1.91  | 3.41E-04 | 4.70E-03 | 1.0          | 1.8          |            |                |      | 1        |       |       | 1.88  | bone morphogenetic protein 7                                                                   | 6.14E-05 | Y        |          |          |
| <i>Hspb6</i>     | 1.41  | 3.42E-04 | 4.70E-03 | 32.7         | 46.0         |            |                |      |          |       |       | 1.67  | heat shock protein, alpha-crystallin-related, B6                                               | 2.73E-08 | Y        |          |          |
| <i>Rad54l</i>    | 1.59  | 3.43E-04 | 4.71E-03 | 2.6          | 4.2          |            |                |      |          |       |       | 2.09  | RAD54-like ( <i>S. cerevisiae</i> )                                                            | 1.20E-07 | Y        |          |          |
| <i>Alk</i>       | -1.41 | 3.44E-04 | 4.71E-03 | 8.3          | 5.8          | 1          | 1              |      |          |       |       | -1.65 | anaplastic lymphoma receptor tyrosine kinase                                                   | 3.50E-08 | Y        |          |          |
| <i>Pcsk1</i>     | -1.40 | 3.44E-04 | 4.71E-03 | 12.2         | 8.7          | 1          | 1              |      |          |       |       | -1.52 | proprotein convertase subtilisin/kexin type 1                                                  | 1.99E-06 | Y        |          |          |

Supplementary Table 1

| gene              | FC    | Pvalue   | FDR      | control RPKM | alcohol RPKM | P drinking | P vs. NP naïve | GWAS | GE in PM | AcbSh | CeA   | DRN   | gene title                                                       | DRN FDR  | same dir | PAG+ ACB | PAG+ CeA |
|-------------------|-------|----------|----------|--------------|--------------|------------|----------------|------|----------|-------|-------|-------|------------------------------------------------------------------|----------|----------|----------|----------|
| <i>Ugt1a9</i>     | -1.66 | 3.44E-04 | 4.71E-03 | 3.9          | 2.4          |            |                |      |          |       |       |       |                                                                  | 6.32E-01 | N        |          |          |
| <i>Kif26b</i>     | -1.44 | 3.44E-04 | 4.71E-03 | 4.7          | 3.3          |            |                | 1    |          |       |       | -1.25 | kinesin family member 26B                                        | 2.88E-02 | Y        |          |          |
| <i>Dusp26</i>     | -1.41 | 3.46E-04 | 4.73E-03 | 35.2         | 25.0         |            | 1              |      | 1        |       |       | -1.41 | dual specificity phosphatase 26 (putative)                       | 1.01E-04 | Y        |          |          |
| <i>Pcdh17</i>     | -1.36 | 3.48E-04 | 4.75E-03 | 63.5         | 46.5         |            |                |      |          |       |       | -1.33 | protocadherin 17                                                 | 8.18E-04 | Y        |          |          |
| <i>Mall</i>       | 2.25  | 3.48E-04 | 4.75E-03 | 0.7          | 1.6          |            |                |      |          |       |       | 2.58  | mal, T-cell differentiation protein-like                         | 5.95E-05 | Y        |          |          |
| <i>Cdkn2c</i>     | 1.64  | 3.50E-04 | 4.76E-03 | 3.8          | 6.3          |            |                |      | 1        |       |       | 3.63  | cyclin-dependent kinase inhibitor 2C (p18, inhibits CDK4)        | 1.44E-12 | Y        |          |          |
| <i>RGD1564620</i> | -2.31 | 3.51E-04 | 4.78E-03 | 2.7          | 1.2          |            |                |      |          |       |       |       |                                                                  | 4.70E-01 | N        |          |          |
| <i>Chmp1b</i>     | -1.42 | 3.52E-04 | 4.79E-03 | 18.7         | 13.2         | 1          | 3              |      |          |       |       |       | charged multivesicular body protein 1B                           | 2.39E-01 | N        |          |          |
| <i>Trim67</i>     | 1.51  | 3.54E-04 | 4.80E-03 | 4.1          | 6.2          |            |                |      |          |       |       | 1.94  | tripartite motif containing 67                                   | 5.24E-08 | Y        |          |          |
| <i>Dnai1</i>      | 1.44  | 3.54E-04 | 4.80E-03 | 10.0         | 14.4         |            |                |      |          |       |       | 1.96  | dynein, axonemal, intermediate chain 1                           | 1.51E-13 | Y        |          |          |
| <i>Mir3541</i>    | 2.40  | 3.57E-04 | 4.84E-03 | 9.7          | 23.1         |            |                |      |          |       |       |       | miRNA 3541                                                       | 3.71E-01 | N        |          |          |
| <i>Tmem100</i>    | -1.44 | 3.65E-04 | 4.94E-03 | 24.3         | 16.9         |            | 2              |      |          |       |       | -1.35 | transmembrane protein 100                                        | 3.14E-03 | Y        |          |          |
| <i>Cd200</i>      | -1.36 | 3.72E-04 | 5.03E-03 | 120.6        | 88.5         |            |                |      | 1        |       |       | -1.67 | CD200 molecule                                                   | 4.04E-11 | Y        |          |          |
| <i>E2f1</i>       | 1.54  | 3.81E-04 | 5.14E-03 | 3.5          | 5.4          |            |                |      |          |       |       | 1.88  | E2F transcription factor 1                                       | 1.79E-06 | Y        |          |          |
| <i>Ehd1</i>       | 1.37  | 3.83E-04 | 5.16E-03 | 33.8         | 46.3         |            | 1              |      |          |       |       |       | EH-domain containing 1                                           | 7.80E-02 | N        |          |          |
| <i>Osgin1</i>     | -2.28 | 3.84E-04 | 5.18E-03 | 1.1          | 0.5          |            |                | 1    |          |       |       |       | oxidative stress induced growth inhibitor 1                      | 0.00E+00 | N        |          |          |
| <i>Scx</i>        | 1.81  | 3.88E-04 | 5.22E-03 | 2.7          | 4.8          |            | 1              |      |          |       |       |       |                                                                  | 1.69E-01 | N        |          |          |
| <i>RGD1563888</i> | -1.47 | 3.90E-04 | 5.25E-03 | 26.7         | 18.1         |            |                |      |          |       |       |       |                                                                  | 1.18E-01 | N        |          |          |
| <i>Pde9a</i>      | 1.41  | 3.91E-04 | 5.25E-03 | 17.8         | 25.1         |            |                |      |          |       |       | 1.70  | phosphodiesterase 9A                                             | 8.55E-09 | Y        |          |          |
| <i>LRRTM1</i>     | -1.44 | 3.96E-04 | 5.31E-03 | 11.3         | 7.8          |            | 1              |      |          |       |       | -1.45 | leucine rich repeat transmembrane neuronal 1                     | 6.79E-05 | Y        |          |          |
| <i>Gstm1</i>      | 1.36  | 3.97E-04 | 5.31E-03 | 159.9        | 218.3        |            |                |      |          |       |       | 1.36  | glutathione S-transferase mu 1                                   | 2.03E-04 | Y        |          |          |
| <i>Akap14</i>     | 1.68  | 4.00E-04 | 5.36E-03 | 2.5          | 4.2          |            |                |      |          |       |       | 2.18  | A kinase (PRKA) anchor protein 14                                | 2.52E-08 | Y        |          |          |
| <i>Hist1h1d</i>   | -1.63 | 4.06E-04 | 5.42E-03 | 85.2         | 52.2         |            |                |      |          |       |       |       | histone cluster 1, H1d                                           | 9.91E-01 | N        |          |          |
| <i>Pde11a</i>     | -1.54 | 4.11E-04 | 5.48E-03 | 3.2          | 2.1          |            |                |      |          |       |       |       | phosphodiesterase 11A                                            | 6.73E-01 | N        |          |          |
| <i>Rims1</i>      | 1.36  | 4.13E-04 | 5.51E-03 | 70.3         | 95.3         | 1          |                |      |          |       |       | 1.51  | regulating synaptic membrane exocytosis 1                        | 2.36E-07 | Y        |          |          |
| <i>Sfrp2</i>      | -1.88 | 4.14E-04 | 5.52E-03 | 2.3          | 1.2          |            |                |      |          |       |       |       | secreted frizzled-related protein 2                              | 9.45E-01 | N        |          |          |
| <i>Mfsd4</i>      | 1.40  | 4.15E-04 | 5.52E-03 | 11.5         | 16.2         |            |                |      |          |       |       | 2.31  | major facilitator superfamily domain containing 4                | 3.42E-18 | Y        |          |          |
| <i>Arhgap24</i>   | -1.48 | 4.15E-04 | 5.52E-03 | 7.6          | 5.1          |            | 2              | 1    |          |       |       | -1.53 | Rho GTPase activating protein 24                                 | 1.05E-06 | Y        |          |          |
| <i>Pnkd</i>       | -1.36 | 4.21E-04 | 5.58E-03 | 66.7         | 49.0         |            | 1              |      | 1        |       |       |       | paroxysmal nonkinesigenic dyskinesia                             | 5.59E-02 | N        |          |          |
| <i>Pcsk6</i>      | 1.39  | 4.21E-04 | 5.58E-03 | 14.1         | 19.7         |            |                |      | 1        |       |       | 2.14  | proprotein convertase subtilisin/kexin type 6                    | 2.40E-18 | Y        |          |          |
| <i>Grb10</i>      | -1.36 | 4.25E-04 | 5.63E-03 | 41.5         | 30.4         | 1          |                | 2    |          |       | -1.19 | -1.66 | growth factor receptor-bound protein 10                          | 9.14E-11 | Y        | Y        |          |
| <i>Tmx4</i>       | -1.35 | 4.29E-04 | 5.68E-03 | 187.4        | 138.8        |            |                |      |          |       |       | -1.43 | thioredoxin-related transmembrane protein 4                      | 6.77E-06 | Y        |          |          |
| <i>Wipf1</i>      | -1.41 | 4.35E-04 | 5.75E-03 | 13.1         | 9.3          |            |                |      |          |       |       |       | WAS/WASL interacting protein family, member 1                    | 1.40E-01 | N        |          |          |
| <i>Map1lc3b</i>   | -1.36 | 4.41E-04 | 5.82E-03 | 124.7        | 91.6         | 1          |                |      |          |       |       | -1.25 | microtubule-associated protein 1 light chain 3 beta              | 1.01E-02 | Y        |          |          |
| <i>Mthfd1l</i>    | 1.37  | 4.43E-04 | 5.85E-03 | 25.1         | 34.4         | 1          | 1              |      |          |       |       | 1.38  | methylenetetrahydrofolate dehydrogenase (NADP+ dependent) 1-like | 2.28E-04 | Y        |          |          |
| <i>Dusp14</i>     | 1.50  | 4.45E-04 | 5.87E-03 | 19.8         | 29.6         |            | 1              |      |          |       |       | 1.94  | dual specificity phosphatase 14                                  | 2.52E-08 | Y        |          |          |
| <i>Dusp3</i>      | -1.36 | 4.48E-04 | 5.89E-03 | 74.2         | 54.8         |            | 1              |      |          |       |       | -1.25 | dual specificity phosphatase 3                                   | 9.42E-03 | Y        |          |          |
| <i>Tmem130</i>    | -1.35 | 4.52E-04 | 5.94E-03 | 392.3        | 291.1        |            |                |      |          |       |       | -1.57 | transmembrane protein 130                                        | 6.05E-09 | Y        |          |          |

Supplementary Table 1

| gene              | FC    | Pvalue   | FDR      | control RPKM | alcohol RPKM | P drinking | P vs. NP naïve | GWAS | GE in PM | AcbSh | CeA | DRN   | gene title                                                        | DRN FDR  | same dir | PAG+ ACB | PAG+ CeA |
|-------------------|-------|----------|----------|--------------|--------------|------------|----------------|------|----------|-------|-----|-------|-------------------------------------------------------------------|----------|----------|----------|----------|
| <i>Cfp</i>        | 1.44  | 4.56E-04 | 5.99E-03 | 13.3         | 19.2         |            |                |      | 1        |       |     | 1.26  | complement factor properdin                                       | 4.44E-02 | Y        |          |          |
| <i>Galr1</i>      | -1.63 | 4.58E-04 | 6.01E-03 | 4.1          | 2.5          |            |                |      |          |       |     | -1.97 | galanin receptor 1                                                | 4.53E-06 | Y        |          |          |
| <i>Theg</i>       | 1.88  | 4.59E-04 | 6.01E-03 | 2.0          | 3.8          |            |                |      |          |       |     | 1.95  | theg spermatid protein                                            | 4.68E-04 | Y        |          |          |
| <i>Nov</i>        | 1.51  | 4.59E-04 | 6.01E-03 | 7.0          | 10.5         |            |                |      |          |       |     | 1.50  | nephroblastoma overexpressed                                      | 3.49E-04 | Y        |          |          |
| <i>Olr59</i>      | -2.01 | 4.59E-04 | 6.01E-03 | 1.2          | 0.6          |            |                |      |          |       |     |       |                                                                   | 2.59E-01 | N        |          |          |
| <i>Lbx1</i>       | 2.96  | 4.66E-04 | 6.09E-03 | 0.5          | 1.3          |            |                |      |          |       |     |       |                                                                   | 0.00E+00 | N        |          |          |
| <i>Armxc2</i>     | -1.36 | 4.76E-04 | 6.21E-03 | 53.8         | 39.5         |            |                |      |          |       |     | -1.77 | armadillo repeat containing, X-linked 2                           | 2.29E-13 | Y        |          |          |
| <i>Slc30a3</i>    | -1.49 | 4.76E-04 | 6.21E-03 | 11.5         | 7.7          |            |                |      |          |       |     |       |                                                                   | 1.07E-01 | N        |          |          |
| <i>Sqcg</i>       | 1.63  | 4.80E-04 | 6.25E-03 | 3.7          | 6.0          |            |                |      |          |       |     | 2.13  | sarcoglycan, gamma (35kDa dystrophin-associated glycoprotein)     | 3.56E-09 | Y        |          |          |
| <i>Rp1</i>        | 1.48  | 4.85E-04 | 6.30E-03 | 2.0          | 2.9          |            |                |      |          |       |     | 1.86  |                                                                   | 1.03E-10 | Y        |          |          |
| <i>Grin2d</i>     | -1.42 | 4.86E-04 | 6.31E-03 | 8.2          | 5.8          |            |                |      |          |       |     | -1.40 | glutamate receptor, ionotropic, N-methyl D-aspartate 2D           | 3.86E-04 | Y        |          |          |
| <i>LOC686506</i>  | -1.48 | 4.87E-04 | 6.32E-03 | 12.1         | 8.2          |            |                |      |          |       |     |       |                                                                   | 3.82E-01 | N        |          |          |
| <i>Ndn</i>        | -1.35 | 4.89E-04 | 6.34E-03 | 205.6        | 152.1        |            |                |      |          |       |     | -1.52 | necdin homolog (mouse)                                            | 8.83E-08 | Y        |          |          |
| <i>Tll10</i>      | 1.58  | 4.90E-04 | 6.35E-03 | 2.9          | 4.6          |            |                |      |          |       |     | 2.12  | tubulin tyrosine ligase-like family, member 10                    | 1.16E-08 | Y        |          |          |
| <i>Capn2</i>      | -1.38 | 4.93E-04 | 6.38E-03 | 24.3         | 17.6         |            |                |      |          |       |     |       |                                                                   | 7.03E-01 | N        |          |          |
| <i>RT1-T24-3</i>  | 1.84  | 4.95E-04 | 6.40E-03 | 1.8          | 3.3          |            |                |      |          |       |     | 1.55  | calpain 2, (m/II) large subunit                                   | 1.10E-02 | Y        |          |          |
| <i>Glr3</i>       | -1.35 | 4.99E-04 | 6.45E-03 | 169.6        | 125.2        |            |                |      | 1        |       |     | -1.24 | glycine receptor, beta                                            | 1.48E-02 | Y        |          |          |
| <i>RGD1565496</i> | -1.35 | 5.05E-04 | 6.51E-03 | 143.3        | 106.1        |            |                |      |          |       |     | -1.40 |                                                                   | 2.76E-05 | Y        |          |          |
| <i>Syt5</i>       | -1.50 | 5.06E-04 | 6.51E-03 | 7.3          | 4.9          |            |                |      |          |       |     | -1.44 | synaptotagmin-like 5                                              | 5.28E-04 | Y        |          |          |
| <i>Efcab1</i>     | 1.45  | 5.06E-04 | 6.52E-03 | 16.3         | 23.7         |            |                |      |          |       |     | 1.66  | EF-hand calcium binding domain 1                                  | 4.63E-08 | Y        |          |          |
| <i>Casp4</i>      | 1.48  | 5.10E-04 | 6.56E-03 | 11.3         | 16.6         |            | 1              |      |          |       |     | 1.82  | caspase 4, apoptosis-related cysteine peptidase                   | 2.27E-08 | Y        |          |          |
| <i>Ston1</i>      | 1.41  | 5.14E-04 | 6.60E-03 | 9.2          | 13.0         |            |                |      |          |       |     | 2.00  |                                                                   | 3.00E-15 | Y        |          |          |
| <i>Cacng3</i>     | -1.58 | 5.17E-04 | 6.63E-03 | 11.8         | 7.5          |            | 1              |      |          |       |     | -1.78 | calcium channel, voltage-dependent, gamma subunit 3               | 1.03E-09 | Y        |          |          |
| <i>Porcn</i>      | 1.37  | 5.18E-04 | 6.64E-03 | 38.3         | 52.6         |            |                |      |          |       |     | 1.46  | porcupine homolog (Drosophila)                                    | 1.57E-05 | Y        |          |          |
| <i>Slc44a1</i>    | -1.35 | 5.19E-04 | 6.65E-03 | 53.8         | 39.8         |            | 2              |      | 1        |       |     | -1.20 | solute carrier family 44, member 1                                | 4.72E-02 | Y        |          |          |
| <i>Zfp385d</i>    | 1.41  | 5.29E-04 | 6.77E-03 | 17.1         | 24.1         |            |                |      |          |       |     | 1.43  |                                                                   | 3.01E-04 | Y        |          |          |
| <i>Vps37b</i>     | 1.42  | 5.31E-04 | 6.79E-03 | 10.1         | 14.4         |            |                |      |          |       |     | 1.56  | vacuolar protein sorting 37 homolog B (S. cerevisiae)             | 7.77E-06 | Y        |          |          |
| <i>RGD1565611</i> | 1.56  | 5.35E-04 | 6.82E-03 | 8.8          | 13.7         |            |                |      |          |       |     | 2.69  |                                                                   | 4.51E-16 | Y        |          |          |
| <i>Plxnb2</i>     | 1.35  | 5.37E-04 | 6.84E-03 | 36.2         | 48.9         |            |                |      |          |       |     | 1.69  | plexin B2                                                         | 5.01E-11 | Y        |          |          |
| <i>Rtn3</i>       | -1.34 | 5.38E-04 | 6.85E-03 | 422.8        | 315.2        |            | 1              |      |          |       |     | -1.45 | reticulon 3                                                       | 2.05E-06 | Y        |          |          |
| <i>Cd38</i>       | -1.39 | 5.39E-04 | 6.86E-03 | 27.8         | 20.0         |            | 1              |      |          |       |     | -1.36 | CD38 molecule                                                     | 5.78E-04 | Y        |          |          |
| <i>Cyp26b1</i>    | 1.37  | 5.41E-04 | 6.88E-03 | 19.4         | 26.5         |            |                |      |          |       |     | 1.25  | cytochrome P450, family 26, subfamily B, polypeptide 1            | 1.50E-02 | Y        |          |          |
| <i>Ubx3</i>       | 1.47  | 5.45E-04 | 6.91E-03 | 8.8          | 12.9         |            |                |      |          |       |     | 1.44  |                                                                   | 6.66E-04 | Y        |          |          |
| <i>Pdzrn4</i>     | -1.59 | 5.46E-04 | 6.92E-03 | 3.0          | 1.9          |            |                |      |          |       |     | -1.42 | PDZ domain containing ring finger 4                               | 3.06E-03 | Y        |          |          |
| <i>Rasgrp2</i>    | -1.42 | 5.46E-04 | 6.92E-03 | 16.9         | 11.9         |            | 2              |      |          |       |     | -1.50 | RAS guanyl releasing protein 2 (calcium and DAG-regulated)        | 1.10E-05 | Y        |          |          |
| <i>Gsta3</i>      | -1.41 | 5.51E-04 | 6.97E-03 | 36.3         | 25.8         |            | 2              |      |          |       |     | -1.35 | glutathione S-transferase alpha 3                                 | 1.46E-03 | Y        |          |          |
| <i>Trim3</i>      | 1.36  | 5.56E-04 | 7.02E-03 | 44.9         | 60.9         |            |                |      |          |       |     | 1.26  | tripartite motif containing 3                                     | 9.75E-03 | Y        |          |          |
| <i>Slc22a23</i>   | -1.35 | 5.56E-04 | 7.02E-03 | 38.6         | 28.5         | 1          |                | 1    |          |       |     |       |                                                                   | 2.16E-01 | N        |          |          |
| <i>Cited2</i>     | 1.37  | 5.57E-04 | 7.02E-03 | 35.7         | 48.9         |            |                |      | 1        |       |     | 1.87  | Cbp/p300-interacting transactivator, with Glu/Asp-rich carboxy-te | 1.25E-13 | Y        |          |          |
| <i>Rnf133</i>     | 1.47  | 5.58E-04 | 7.03E-03 | 10.2         | 15.0         |            |                |      |          |       |     | 3.50  | ring finger protein 133                                           | 2.71E-23 | Y        |          |          |

Supplementary Table 1

| gene              | FC    | Pvalue   | FDR      | control RPKM | alcohol RPKM | P drinking | P vs. NP naïve | GWAS | GE in PM | AcbSh | CeA   | DRN   | gene title                                                                                            | DRN FDR  | same dir | PAG+ ACB | PAG+ CeA |
|-------------------|-------|----------|----------|--------------|--------------|------------|----------------|------|----------|-------|-------|-------|-------------------------------------------------------------------------------------------------------|----------|----------|----------|----------|
| <i>Fign</i>       | -1.49 | 5.58E-04 | 7.03E-03 | 5.8          | 3.9          |            |                |      |          |       |       |       | fidgetin                                                                                              | 9.66E-01 | N        |          |          |
| <i>Ccdc134</i>    | 1.49  | 5.61E-04 | 7.06E-03 | 7.4          | 11.0         |            |                |      |          |       |       | 1.93  | coiled-coil domain containing 134                                                                     | 2.38E-09 | Y        |          |          |
| <i>Rassf4</i>     | -1.41 | 5.63E-04 | 7.07E-03 | 15.7         | 11.1         | 2          | 1              |      | 1        |       |       |       | Ras association (RalGDS/AF-6) domain family member 4                                                  | 8.20E-01 | N        |          |          |
| <i>RGD1565819</i> | 1.55  | 5.65E-04 | 7.09E-03 | 1.6          | 2.5          |            |                |      |          |       |       | 1.71  |                                                                                                       | 3.16E-05 | Y        |          |          |
| <i>RragB</i>      | -1.35 | 5.66E-04 | 7.10E-03 | 100.4        | 74.3         |            | 1              |      | 1        |       |       | -1.35 | Ras-related GTP binding B                                                                             | 3.28E-04 | Y        |          |          |
| <i>Rasgrf2</i>    | -1.44 | 5.73E-04 | 7.17E-03 | 7.7          | 5.4          |            |                | 1    |          |       |       | -1.60 | Ras protein-specific guanine nucleotide-releasing factor 2                                            | 1.14E-07 | Y        |          |          |
| <i>Slc43a2</i>    | 1.35  | 5.77E-04 | 7.21E-03 | 39.2         | 53.0         |            | 2              | 1    |          |       |       | 1.46  | solute carrier family 43, member 2                                                                    | 5.64E-06 | Y        |          |          |
| <i>Enkur</i>      | 1.44  | 5.77E-04 | 7.21E-03 | 15.2         | 21.9         |            |                |      |          |       |       | 1.98  | enkurin, TRPC channel interacting protein                                                             | 3.94E-13 | Y        |          |          |
| <i>C1qtnf9</i>    | -3.52 | 5.78E-04 | 7.21E-03 | 1.0          | 0.3          |            |                |      |          |       |       |       | C1q and tumor necrosis factor related protein 9                                                       | 0.00E+00 | N        |          |          |
| <i>Plcd4</i>      | -1.39 | 5.81E-04 | 7.24E-03 | 20.5         | 14.7         | 1          | 1              |      | 1        |       |       |       | phospholipase C, delta 4                                                                              | 1.93E-01 | N        |          |          |
| <i>Cyt11</i>      | 2.67  | 5.81E-04 | 7.24E-03 | 0.4          | 0.9          |            |                |      |          |       |       |       | cytokine-like 1                                                                                       | 6.86E-01 | N        |          |          |
| <i>Atp13a4</i>    | -1.42 | 5.82E-04 | 7.24E-03 | 8.3          | 5.8          |            |                |      |          |       |       | -1.32 | ATPase type 13A4                                                                                      | 4.97E-03 | Y        |          |          |
| <i>Ptk1</i>       | -1.35 | 5.83E-04 | 7.25E-03 | 55.6         | 41.2         |            | 1              | 1    |          |       |       | -1.46 |                                                                                                       | 2.58E-06 | Y        |          |          |
| <i>Ubash3b</i>    | 1.37  | 5.84E-04 | 7.25E-03 | 25.4         | 34.8         |            | 3              | 1    |          |       |       | 1.55  | ubiquitin associated and SH3 domain containing B                                                      | 5.85E-07 | Y        |          |          |
| <i>Notch2</i>     | 1.36  | 5.84E-04 | 7.25E-03 | 13.6         | 18.4         |            |                |      |          |       |       | 1.67  | notch 2                                                                                               | 4.63E-10 | Y        |          |          |
| <i>Limk1</i>      | -1.36 | 5.87E-04 | 7.28E-03 | 39.5         | 29.0         |            | 1              |      |          |       |       | -1.28 | LIM domain kinase 1                                                                                   | 5.06E-03 | Y        |          |          |
| <i>En2</i>        | 1.37  | 5.99E-04 | 7.42E-03 | 23.2         | 31.7         |            |                |      | 1        |       |       | 1.64  | engrailed homeobox 2                                                                                  | 1.59E-08 | Y        |          |          |
| <i>Mcm7</i>       | 1.45  | 6.01E-04 | 7.44E-03 | 7.4          | 10.7         |            |                |      |          |       |       |       | minichromosome maintenance complex component 7                                                        | 4.47E-01 | N        |          |          |
| <i>Ppfi1</i>      | 1.35  | 6.02E-04 | 7.44E-03 | 35.4         | 47.8         |            |                |      |          |       |       | 1.47  | protein tyrosine phosphatase, receptor type, f polypeptide (PTPRF)                                    | 2.60E-06 | Y        |          |          |
| <i>Prelp</i>      | 1.47  | 6.13E-04 | 7.56E-03 | 10.1         | 14.9         |            |                |      |          |       |       | 2.05  | proline/arginine-rich end leucine-rich repeat protein                                                 | 4.16E-12 | Y        |          |          |
| <i>Kcnk2</i>      | -1.39 | 6.16E-04 | 7.59E-03 | 16.0         | 11.5         |            | 1              |      |          |       |       | -1.51 | potassium channel, subfamily K, member 2                                                              | 5.57E-06 | Y        |          |          |
| <i>Sephs2</i>     | -1.37 | 6.16E-04 | 7.59E-03 | 34.3         | 25.0         | 1          | 4              |      |          |       |       | -1.25 | selenophosphate synthetase 2                                                                          | 1.52E-02 | Y        |          |          |
| <i>Sh3gl3</i>     | -1.40 | 6.17E-04 | 7.59E-03 | 31.4         | 22.4         |            | 1              | 1    |          |       |       | -1.47 | SH3-domain GRB2-like 3                                                                                | 2.29E-05 | Y        |          |          |
| <i>Chrm2</i>      | -1.70 | 6.18E-04 | 7.59E-03 | 17.1         | 10.0         |            |                |      |          |       |       | -1.28 | cholinergic receptor, muscarinic 2                                                                    | 1.95E-04 | Y        |          |          |
| <i>P2rx4</i>      | 1.38  | 6.19E-04 | 7.60E-03 | 25.5         | 35.2         |            | 1              |      |          |       |       | 1.56  | purinergic receptor P2X, ligand-gated ion channel, 4                                                  | 4.41E-07 | Y        |          |          |
| <i>Grap</i>       | 2.40  | 6.22E-04 | 7.63E-03 | 0.6          | 1.4          |            |                |      |          |       |       |       | GRB2-related adaptor protein                                                                          | 4.06E-01 | N        |          |          |
| <i>Adat3</i>      | 1.59  | 6.23E-04 | 7.63E-03 | 4.4          | 6.9          |            |                |      |          |       |       | 1.50  | adenosine deaminase, tRNA-specific 3                                                                  | 7.83E-03 | Y        |          |          |
| <i>Syt6</i>       | -1.44 | 6.28E-04 | 7.68E-03 | 16.5         | 11.5         | 1          | 1              |      |          |       |       | -1.30 | synaptotagmin VI                                                                                      | 2.92E-02 | Y        |          |          |
| <i>Aplp1</i>      | -1.34 | 6.33E-04 | 7.74E-03 | 548.5        | 410.2        |            |                |      |          |       |       | -1.36 | amyloid beta (A4) precursor-like protein 1                                                            | 1.29E-04 | Y        |          |          |
| <i>Lrrc43</i>     | 1.66  | 6.36E-04 | 7.78E-03 | 2.2          | 3.6          |            |                |      |          |       |       | 2.18  | leucine rich repeat containing 43                                                                     | 1.35E-07 | Y        |          |          |
| <i>B3gnt4</i>     | 1.60  | 6.39E-04 | 7.81E-03 | 4.0          | 6.5          |            |                |      |          |       |       | 2.94  | UDP-GlcNAc:betaGal beta-1,3-N-acetylglucosaminyltransferase 4                                         | 1.62E-12 | Y        |          |          |
| <i>Gfra2</i>      | -1.38 | 6.42E-04 | 7.83E-03 | 22.4         | 16.2         |            | 1              |      |          |       |       | -1.33 | GDNF family receptor alpha 2                                                                          | 2.10E-03 | Y        |          |          |
| <i>Olig2</i>      | -1.40 | 6.52E-04 | 7.94E-03 | 16.1         | 11.5         |            |                |      |          |       |       | -1.29 | oligodendrocyte lineage transcription factor 2                                                        | 1.21E-02 | Y        |          |          |
| <i>C1r</i>        | 1.40  | 6.52E-04 | 7.94E-03 | 11.7         | 16.4         | 1          | 3              |      | 1        |       | -1.44 | 1.90  | complement component 1, r subcomponent glutamate decarboxylase 2 (pancreatic islets and brain, 65kDa) | 3.34E-12 | Y        |          | N        |
| <i>Gad2</i>       | -1.35 | 6.61E-04 | 8.04E-03 | 129.6        | 96.3         | 2          |                |      | 1        |       |       |       |                                                                                                       | 6.37E-01 | N        |          |          |

Supplementary Table 1

| gene             | FC    | Pvalue   | FDR      | control RPKM | alcohol RPKM | P drinking | P vs. NP naïve | GWAS | GE in PM | AcbSh | CeA  | DRN   | gene title                                                          | DRN FDR  | same dir | PAG+ ACB | PAG+ CeA |
|------------------|-------|----------|----------|--------------|--------------|------------|----------------|------|----------|-------|------|-------|---------------------------------------------------------------------|----------|----------|----------|----------|
| <i>Zcchc12</i>   | -1.34 | 6.78E-04 | 8.23E-03 | 191.2        | 142.6        |            |                |      |          |       |      | -1.51 | zinc finger, CCHC domain containing 12                              | 1.48E-07 | Y        |          |          |
| <i>Timm13</i>    | 1.46  | 6.78E-04 | 8.23E-03 | 17.9         | 26.1         | 1          |                |      |          |       |      |       | translocase of inner mitochondrial membrane 13 homolog (yeast) //   | 6.00E-01 | N        |          |          |
| <i>Kcna6</i>     | -1.34 | 6.79E-04 | 8.23E-03 | 47.2         | 35.2         |            | 1              |      |          |       |      | -1.35 | potassium voltage-gated channel, shaker-related subfamily, member   | 2.36E-04 | Y        |          |          |
| <i>Slc2a5</i>    | -1.59 | 6.80E-04 | 8.24E-03 | 4.3          | 2.7          | 1          |                |      |          |       |      |       | solute carrier family 2 (facilitated glucose/fructose transporter), | 6.23E-02 | N        |          | Y        |
| <i>Tmem38a</i>   | 1.37  | 6.82E-04 | 8.25E-03 | 42.7         | 58.5         | 1          |                |      |          |       |      | 1.12  | transmembrane protein 38A                                           | 2.02E-01 | N        |          | Y        |
| <i>Akap8l</i>    | 1.36  | 6.83E-04 | 8.26E-03 | 49.2         | 66.6         | 3          | 1              |      | 1        |       |      |       | A kinase (PRKA) anchor protein 8-like                               | 5.25E-02 | N        |          |          |
| <i>Tmeff2</i>    | -1.36 | 6.86E-04 | 8.28E-03 | 37.5         | 27.6         |            |                |      |          |       |      |       | transmembrane protein with EGF-like and two follistatin-like doma   | 1.79E-03 | Y        |          |          |
| <i>Dos</i>       | -1.34 | 6.92E-04 | 8.34E-03 | 115.7        | 86.3         |            |                |      |          |       |      |       | downstream of Stk11                                                 | 1.42E-03 | Y        |          |          |
| <i>Igfbp5</i>    | 1.36  | 6.96E-04 | 8.38E-03 | 53.0         | 72.0         | 1          |                |      |          |       |      |       | insulin-like growth factor binding protein 5                        | 6.92E-26 | Y        |          | N        |
| <i>P2rx6</i>     | 1.37  | 6.97E-04 | 8.40E-03 | 23.5         | 32.3         |            |                |      |          |       |      |       | purinergic receptor P2X, ligand-gated ion channel, 6                | 4.94E-13 | Y        |          |          |
| <i>LOC688452</i> | 1.39  | 7.00E-04 | 8.42E-03 | 29.2         | 40.7         |            |                |      |          |       |      |       | hyperpolarization activated cyclic nucleotide-gated potassiu        | 3.71E-04 | Y        |          |          |
| <i>Hcn4</i>      | -1.55 | 7.04E-04 | 8.46E-03 | 2.9          | 1.9          |            |                |      |          |       |      |       | phosphatidylinositol transfer protein, membrane-associated 1        | 7.00E-01 | N        |          |          |
| <i>Rnf190</i>    | 1.79  | 7.09E-04 | 8.51E-03 | 1.0          | 1.7          |            |                |      |          |       |      |       | potassium voltage-gated channel, shaker-related subfamily, beta m   | 1.15E-05 | Y        |          |          |
| <i>Bcl6</i>      | 1.36  | 7.13E-04 | 8.55E-03 | 24.7         | 33.5         |            | 1              |      | 1        |       |      |       | ribosomal protein S6 kinase, 70kDa, polypeptide 2                   | 5.43E-14 | Y        |          |          |
| <i>Pitpnm1</i>   | 1.34  | 7.19E-04 | 8.62E-03 | 101.4        | 135.6        | 1          |                |      | 1        |       |      |       | monocyte to macrophage differentiation-associated 2                 | 6.47E-03 | Y        |          |          |
| <i>Kcnab2</i>    | -1.35 | 7.24E-04 | 8.66E-03 | 79.9         | 59.0         |            |                |      |          |       |      |       | potassium channel tetramerisation domain containing 9               | 9.29E-02 | N        |          |          |
| <i>Rps6kb2</i>   | 1.40  | 7.38E-04 | 8.83E-03 | 16.4         | 23.0         |            |                |      | 1        |       |      |       | BTB (POZ) domain containing 3                                       | 6.15E-02 | N        |          |          |
| <i>Mmd2</i>      | -1.35 | 7.45E-04 | 8.90E-03 | 82.0         | 60.9         |            |                |      |          |       |      |       | spermatogenesis associated 24                                       | 2.69E-01 | N        |          |          |
| <i>Kctd9</i>     | -1.37 | 7.50E-04 | 8.95E-03 | 24.5         | 17.9         |            | 1              |      |          |       |      |       | complement component 6                                              | 1.20E-04 | Y        |          |          |
| <i>Btbd3</i>     | 1.34  | 7.54E-04 | 8.98E-03 | 109.0        | 146.0        |            | 1              |      |          |       |      |       | LIM domain containing preferred translocation partner in lipoma     | 6.05E-21 | Y        |          |          |
| <i>Spata24</i>   | 1.72  | 7.56E-04 | 9.00E-03 | 5.2          | 9.0          |            |                |      |          |       |      |       | calcium and integrin binding family member 2                        | 1.97E-02 | Y        |          |          |
| <i>C6</i>        | -2.35 | 7.63E-04 | 9.07E-03 | 0.0          | 0.0          |            |                |      |          |       |      |       | transducer of ERBB2, 1                                              | 0.00E+00 | N        |          |          |
| <i>Lpp</i>       | 1.39  | 7.68E-04 | 9.12E-03 | 15.2         | 21.2         |            |                |      |          |       |      |       | ELKS/RAB6-interacting/CAST family member 1                          | 1.14E-07 | Y        |          |          |
| <i>LOC683626</i> | -1.37 | 7.68E-04 | 9.12E-03 | 31.8         | 23.2         |            |                |      |          |       |      |       | hematopoietically expressed homeobox                                | 2.88E-04 | Y        |          |          |
| <i>Cib2</i>      | -1.41 | 7.70E-04 | 9.13E-03 | 25.2         | 17.9         |            | 1              |      |          |       |      |       | Kv channel interacting protein 4                                    | 9.03E-03 | Y        |          |          |
| <i>Dhdpsl</i>    | -1.68 | 7.71E-04 | 9.13E-03 | 3.7          | 2.2          |            |                |      |          |       |      |       | ependymin related protein 1 (zebrafish)                             | 5.47E-01 | N        |          |          |
| <i>Tob1</i>      | 1.35  | 7.72E-04 | 9.14E-03 | 43.2         | 58.5         |            |                |      |          |       |      |       | protocadherin 18                                                    | 1.03E-10 | Y        |          |          |
| <i>Erc1</i>      | 1.34  | 7.76E-04 | 9.18E-03 | 54.4         | 72.9         |            |                |      |          |       |      |       | discoidin domain receptor tyrosine kinase 2                         | 1.34E-05 | Y        |          |          |
| <i>Hhex</i>      | -2.00 | 7.81E-04 | 9.23E-03 | 2.0          | 1.0          | 3          | 1              |      |          |       | 1.27 |       | microRNA 29b-1                                                      | 3.05E-01 | N        | N        |          |
| <i>Kcnip4</i>    | 1.38  | 7.85E-04 | 9.26E-03 | 32.1         | 44.3         | 1          | 1              | 1    |          |       |      |       |                                                                     | 1.57E-07 | Y        |          |          |
| <i>Epdr1</i>     | -1.35 | 7.87E-04 | 9.28E-03 | 71.5         | 53.0         |            |                |      |          |       |      |       |                                                                     | 7.37E-05 | Y        |          |          |
| <i>Pcdh18</i>    | -1.39 | 7.88E-04 | 9.28E-03 | 9.1          | 6.5          |            | 1              |      |          |       |      |       |                                                                     | 1.74E-02 | Y        |          |          |
| <i>Ddr2</i>      | 1.51  | 7.90E-04 | 9.29E-03 | 2.7          | 4.1          |            | 1              |      |          |       |      |       |                                                                     | 1.84E-05 | Y        |          |          |
| <i>Mir29b-1</i>  | -3.59 | 8.00E-04 | 9.41E-03 | 13.1         | 3.6          |            |                |      |          |       |      |       |                                                                     | 0.00E+00 | N        |          |          |

Supplementary Table 1

| gene              | FC    | Pvalue   | FDR      | control RPKM | alcohol RPKM | P drinking | P vs. NP naïve | GWAS | GE in PM | AcbSh | CeA | DRN   | gene title                                                        | DRN FDR  | same dir | PAG+ ACB | PAG+ CeA |
|-------------------|-------|----------|----------|--------------|--------------|------------|----------------|------|----------|-------|-----|-------|-------------------------------------------------------------------|----------|----------|----------|----------|
| <i>Pex11a</i>     | -1.39 | 8.05E-04 | 9.46E-03 | 18.8         | 13.5         | 1          | 1              |      |          |       |     | -1.35 | peroxisomal biogenesis factor 11 alpha                            | 1.76E-03 | Y        |          |          |
| <i>Kcnd2</i>      | 1.33  | 8.10E-04 | 9.50E-03 | 112.6        | 150.2        | 1          |                | 1    |          |       |     | 1.63  | potassium voltage-gated channel, Shal-related subfamily, member 2 | 5.15E-10 | Y        |          |          |
| <i>Dysf</i>       | -1.52 | 8.10E-04 | 9.50E-03 | 2.1          | 1.4          |            |                |      |          |       |     | -1.75 | dysferlin, limb girdle muscular dystrophy 2B (autosomal rece      | 8.00E-10 | Y        |          |          |
| <i>Nrg2</i>       | 1.41  | 8.12E-04 | 9.51E-03 | 7.2          | 10.2         |            |                |      |          |       |     | 1.88  | neuregulin 2                                                      | 7.31E-10 | Y        |          |          |
| <i>Phyh1pl</i>    | -1.34 | 8.16E-04 | 9.54E-03 | 118.6        | 88.3         |            |                |      |          |       |     |       | phytanoyl-CoA 2-hydroxylase interacting protein-like              | 1.57E-01 | N        |          |          |
| <i>Prdx3</i>      | -1.37 | 8.19E-04 | 9.57E-03 | 49.8         | 36.4         | 1          |                |      |          |       |     | -1.33 | peroxiredoxin 3                                                   | 1.14E-03 | Y        |          |          |
| <i>Ppapdc1a</i>   | -1.47 | 8.31E-04 | 9.71E-03 | 14.4         | 9.8          |            | 1              |      |          |       |     | -1.54 | phosphatidic acid phosphatase type 2 domain containing 1A         | 5.05E-05 | Y        |          |          |
| <i>Slc1a2</i>     | -1.33 | 8.33E-04 | 9.72E-03 | 338.6        | 254.6        |            |                |      | 2        |       |     |       | solute carrier family 1 (glial high affinity glutamate tra        | 1.37E-01 | N        |          |          |
| <i>Tmem51</i>     | 1.44  | 8.36E-04 | 9.75E-03 | 8.0          | 11.6         |            |                |      |          |       |     | 1.71  | transmembrane protein 51                                          | 1.51E-06 | Y        |          |          |
| <i>Ctxn2</i>      | -1.51 | 8.42E-04 | 9.80E-03 | 30.4         | 20.1         | 1          | 1              |      |          | -1.12 |     | -1.91 |                                                                   | 8.11E-10 | Y        | Y        |          |
| <i>Irf7</i>       | 1.55  | 8.45E-04 | 9.83E-03 | 3.6          | 5.5          |            | 1              |      |          |       |     | 1.32  | interferon regulatory factor 7                                    | 3.07E-02 | Y        |          |          |
| <i>Smarcd2</i>    | 1.36  | 8.51E-04 | 9.89E-03 | 22.3         | 30.3         | 1          |                |      |          |       |     | 1.63  | SWI/SNF related, matrix associated, actin dependent regulator of  | 2.65E-08 | Y        |          |          |
| <i>Tcte1</i>      | 1.43  | 8.54E-04 | 9.92E-03 | 6.4          | 9.2          |            |                |      |          |       |     | 1.64  | t-complex-associated-testis-expressed 1                           | 1.61E-06 | Y        |          |          |
| <i>RGD1561039</i> | -2.44 | 8.59E-04 | 9.97E-03 | 3.2          | 1.3          |            |                |      |          |       |     |       |                                                                   | 7.07E-01 | N        |          |          |
| <i>Ankrd34b</i>   | -1.40 | 8.62E-04 | 1.00E-02 | 11.3         | 8.0          | 1          |                |      |          | -1.15 |     | -1.28 | ankyrin repeat domain 34B                                         | 7.76E-03 | Y        | Y        |          |
| <i>Jun</i>        | 1.36  | 8.71E-04 | 1.01E-02 | 20.8         | 28.2         | 2          |                |      |          | 1.2   |     | 1.33  | jun proto-oncogene                                                | 1.40E-03 | Y        | Y        |          |
| <i>Aqpat9</i>     | -1.55 | 8.83E-04 | 1.02E-02 | 5.4          | 3.5          |            |                |      |          |       |     |       | 1-acylglycerol-3-phosphate O-acyltransferase 9                    | 7.19E-02 | N        |          |          |
| <i>Sh3bp5</i>     | 1.36  | 8.84E-04 | 1.02E-02 | 23.2         | 31.6         |            |                | 2    |          |       |     | 1.22  | SH3-domain binding protein 5 (BTK-associated)                     | 4.07E-02 | Y        |          |          |
| <i>Snrk</i>       | 1.34  | 8.86E-04 | 1.02E-02 | 58.3         | 78.0         |            |                |      |          |       |     | 1.44  | SNF related kinase                                                | 9.84E-06 | Y        |          |          |
| <i>Folr1</i>      | 1.58  | 8.86E-04 | 1.02E-02 | 6.5          | 10.2         |            |                |      |          |       |     | 3.37  | folate receptor 1 (adult)                                         | 3.87E-19 | Y        |          |          |
| <i>Tcp11</i>      | 4.31  | 8.90E-04 | 1.03E-02 | 0.0          | 0.0          |            |                |      |          |       |     |       | t-complex 11 homolog (mouse)                                      | 0.00E+00 | N        |          |          |
| <i>Rassf5</i>     | -1.36 | 8.95E-04 | 1.03E-02 | 21.2         | 15.5         |            | 1              |      |          |       |     |       | Ras association (RalGDS/AF-6) domain family member 5              | 2.67E-01 | N        |          |          |
| <i>Trim59</i>     | -1.44 | 9.04E-04 | 1.04E-02 | 8.3          | 5.7          |            | 1              |      | 1        |       |     | -1.45 | tripartite motif containing 59                                    | 3.87E-04 | Y        |          |          |
| <i>Otud7b</i>     | -1.34 | 9.11E-04 | 1.05E-02 | 33.0         | 24.6         |            |                |      |          |       |     |       | OTU domain containing 7B                                          | 5.37E-02 | N        |          |          |
| <i>RGD1359156</i> | -2.24 | 9.13E-04 | 1.05E-02 | 2.0          | 0.9          |            |                |      |          |       |     |       |                                                                   | 7.81E-01 | N        |          |          |
| <i>Pde1a</i>      | -1.41 | 9.13E-04 | 1.05E-02 | 17.1         | 12.1         |            |                |      |          |       |     | -1.66 | phosphodiesterase 1A, calmodulin-dependent                        | 1.47E-09 | Y        |          |          |
| <i>Chi3l1</i>     | -1.38 | 9.14E-04 | 1.05E-02 | 28.4         | 20.5         | 1          |                |      |          |       |     |       | chitinase 3-like 1 (cartilage glycoprotein-39)                    | 2.18E-01 | N        |          |          |
| <i>Ppp2r3a</i>    | -1.35 | 9.31E-04 | 1.07E-02 | 18.2         | 13.5         |            |                | 1    |          |       |     | -1.27 | protein phosphatase 2, regulatory subunit B", alpha               | 8.30E-03 | Y        |          |          |
| <i>Hr</i>         | 1.35  | 9.39E-04 | 1.07E-02 | 14.9         | 20.1         |            |                |      |          |       |     | 1.62  | hairless homolog (mouse)                                          | 1.90E-08 | Y        |          |          |
| <i>Fnta</i>       | -1.35 | 9.40E-04 | 1.07E-02 | 56.4         | 41.7         |            | 1              |      | 1        |       |     |       | farnesyltransferase, CAAX box, alpha                              | 6.78E-02 | N        |          |          |
| <i>Srd5a1</i>     | -1.39 | 9.46E-04 | 1.08E-02 | 16.2         | 11.6         |            |                |      |          |       |     |       | steroid-5-alpha-reductase, alpha polypeptide 1 (3-oxo-5 alpha-ste | 8.95E-02 | N        |          |          |
| <i>Prlr</i>       | -1.53 | 9.49E-04 | 1.08E-02 | 4.7          | 3.1          |            |                |      |          |       |     | -1.43 | prolactin receptor                                                | 2.88E-02 | Y        |          |          |
| <i>Atp2b3</i>     | 1.33  | 9.52E-04 | 1.09E-02 | 92.4         | 122.8        |            |                |      |          |       |     | 1.54  | ATPase, Ca++ transporting, plasma membrane 3                      | 4.68E-08 | Y        |          |          |
| <i>Ypel5</i>      | -1.34 | 9.54E-04 | 1.09E-02 | 96.8         | 72.4         |            |                |      |          |       |     | -1.30 | yippee-like 5 (Drosophila)                                        | 2.02E-03 | Y        |          |          |
| <i>Crb2</i>       | 1.40  | 9.58E-04 | 1.09E-02 | 8.1          | 11.4         |            |                |      |          |       |     | 1.66  | crumbs homolog 2 (Drosophila)                                     | 2.54E-07 | Y        |          |          |

Supplementary Table 1

| gene              | FC    | Pvalue   | FDR      | control RPKM | alcohol RPKM | P drinking | P vs. NP naïve | GWAS | GE in PM | AcbSh | CeA | DRN   | gene title                                                          | DRN FDR  | same dir | PAG+ ACB | PAG+ CeA |
|-------------------|-------|----------|----------|--------------|--------------|------------|----------------|------|----------|-------|-----|-------|---------------------------------------------------------------------|----------|----------|----------|----------|
| <i>Npr3</i>       | -1.94 | 9.71E-04 | 1.10E-02 | 2.0          | 1.0          |            |                |      |          |       |     |       | natriuretic peptide receptor C/guanylate cyclase C (atriuretic)     | 0.00E+00 | N        |          |          |
| <i>Map1a</i>      | -1.32 | 9.85E-04 | 1.12E-02 | 286.2        | 216.5        |            |                |      |          |       |     |       | microtubule-associated protein 1A                                   | 8.50E-02 | N        |          |          |
| <i>Egfl8</i>      | 1.61  | 9.88E-04 | 1.12E-02 | 3.7          | 5.9          |            |                |      |          |       |     | 2.45  | EGF-like-domain, multiple 8                                         | 1.70E-08 | Y        |          |          |
| <i>Syn1</i>       | -1.34 | 9.89E-04 | 1.12E-02 | 58.6         | 43.9         |            | 1              |      |          |       |     | -1.25 | synapsin I                                                          | 1.28E-02 | Y        |          |          |
| <i>Maf</i>        | 1.43  | 9.92E-04 | 1.12E-02 | 8.4          | 12.0         |            |                |      |          |       |     | 2.08  | v-maf musculoaponeurotic fibrosarcoma oncogene homolog (avian)      | 4.12E-11 | Y        |          |          |
| <i>Sgms2</i>      | -1.58 | 9.96E-04 | 1.13E-02 | 4.8          | 3.0          |            |                |      |          |       |     |       | sphingomyelin synthase 2                                            | 7.79E-02 | N        |          |          |
| <i>Nppc</i>       | 1.78  | 1.00E-03 | 1.13E-02 | 2.6          | 4.6          |            |                |      |          |       |     | 1.67  | natriuretic peptide C                                               | 9.39E-03 | Y        |          |          |
| <i>Trhr</i>       | -1.52 | 1.01E-03 | 1.14E-02 | 3.5          | 2.3          |            | 1              |      |          |       |     | -1.63 | thyrotropin-releasing hormone receptor                              | 1.76E-03 | Y        |          |          |
| <i>Kcnc2</i>      | -1.34 | 1.01E-03 | 1.14E-02 | 50.1         | 37.5         | 1          | 1              | 1    |          |       |     | -1.24 | potassium voltage-gated channel, Shaw-related subfamily, member 2   | 1.77E-02 | Y        |          |          |
| <i>Abr</i>        | -1.32 | 1.01E-03 | 1.14E-02 | 128.3        | 96.9         |            | 1              |      |          |       |     | -1.29 | active BCR-related                                                  | 2.33E-03 | Y        |          |          |
| <i>Mir770</i>     | -1.38 | 1.02E-03 | 1.15E-02 | 556.4        | 402.1        |            |                |      |          |       |     |       |                                                                     | 6.32E-02 | N        |          |          |
| <i>Prph</i>       | -1.44 | 1.03E-03 | 1.15E-02 | 11.7         | 8.1          |            |                |      |          |       |     |       |                                                                     | 5.03E-01 | N        |          |          |
| <i>Tmem90b</i>    | 1.35  | 1.03E-03 | 1.16E-02 | 39.5         | 53.2         |            | 1              |      | 1        |       |     | 1.84  | peripherin                                                          | 7.39E-13 | Y        |          |          |
| <i>Epb49</i>      | -1.34 | 1.03E-03 | 1.16E-02 | 57.8         | 43.2         |            |                |      |          |       |     | -1.21 | erythrocyte membrane protein band 4.9 (dematin)                     | 4.03E-02 | Y        |          |          |
| <i>Dgkb</i>       | -1.34 | 1.04E-03 | 1.16E-02 | 24.2         | 18.1         |            | 2              | 1    |          |       |     | -1.42 | diacylglycerol kinase, beta 90kDa                                   | 1.93E-05 | Y        |          |          |
| <i>Tal1</i>       | -1.40 | 1.05E-03 | 1.17E-02 | 7.7          | 5.5          |            |                |      |          |       |     | -1.30 | T-cell acute lymphocytic leukemia 1                                 | 1.06E-02 | Y        |          |          |
| <i>Slc44a4</i>    | 1.44  | 1.05E-03 | 1.18E-02 | 6.7          | 9.7          |            |                |      |          |       |     | 2.31  | solute carrier family 44, member 4                                  | 3.34E-16 | Y        |          |          |
| <i>Cys1</i>       | -1.46 | 1.06E-03 | 1.18E-02 | 5.9          | 4.1          |            | 1              |      |          |       |     | -1.28 | cystin 1                                                            | 3.83E-02 | Y        |          |          |
| <i>Ugt1a7c</i>    | -1.54 | 1.07E-03 | 1.19E-02 | 4.7          | 3.0          |            |                |      |          |       |     |       |                                                                     | 6.52E-01 | N        |          |          |
| <i>Scn5a</i>      | -1.64 | 1.08E-03 | 1.21E-02 | 0.8          | 0.5          |            |                |      |          |       |     | -1.63 | sodium channel, voltage-gated, type V, alpha subunit                | 7.56E-03 | Y        |          |          |
| <i>Mpp5</i>       | -1.36 | 1.08E-03 | 1.21E-02 | 23.2         | 17.0         |            |                |      |          |       |     | -1.27 | membrane protein, palmitoylated 5 (MAGUK p55 subfamily member 5) // | 9.87E-03 | Y        |          |          |
| <i>Adfp</i>       | -1.41 | 1.09E-03 | 1.21E-02 | 14.5         | 10.2         |            | 1              |      |          |       |     | -1.48 | adipose differentiation related protein                             | 4.43E-05 | Y        |          |          |
| <i>Tomm20</i>     | -1.34 | 1.10E-03 | 1.23E-02 | 118.3        | 88.1         | 1          |                |      |          |       |     | -1.41 | translocase of outer mitochondrial membrane 20 homolog (yeast)      | 3.57E-05 | Y        |          |          |
| <i>Tll2</i>       | 2.43  | 1.11E-03 | 1.24E-02 | 0.3          | 0.6          |            |                |      |          |       |     |       |                                                                     | 7.43E-01 | N        |          |          |
| <i>Ctbp2</i>      | 1.34  | 1.12E-03 | 1.24E-02 | 25.7         | 34.5         |            | 1              | 1    |          |       |     | 1.41  | C-terminal binding protein 2                                        | 5.13E-05 | Y        |          |          |
| <i>Kcnq3</i>      | -1.34 | 1.12E-03 | 1.24E-02 | 19.1         | 14.2         | 2          |                |      |          |       |     | -1.39 | potassium voltage-gated channel, KQT-like subfamily, member 3       | 8.61E-05 | Y        |          |          |
| <i>Znf521</i>     | 1.33  | 1.12E-03 | 1.24E-02 | 41.2         | 54.9         |            |                | 1    |          |       |     | 2.09  | zinc finger protein 521                                             | 3.34E-20 | Y        |          |          |
| <i>Rnf182</i>     | 1.38  | 1.13E-03 | 1.25E-02 | 24.2         | 33.4         |            | 1              |      | 1        |       |     | 2.77  | ring finger protein 182                                             | 1.53E-25 | Y        |          |          |
| <i>Sp110</i>      | 1.58  | 1.14E-03 | 1.26E-02 | 3.0          | 4.8          | 1          |                |      |          |       |     |       |                                                                     | 3.71E-01 | N        |          |          |
| <i>Prtfdc1</i>    | -1.38 | 1.14E-03 | 1.26E-02 | 39.9         | 29.0         |            |                | 1    |          |       |     |       |                                                                     | 1.66E-01 | N        |          |          |
| <i>Rnf40</i>      | 1.34  | 1.14E-03 | 1.26E-02 | 21.4         | 28.8         |            |                |      |          |       |     | 1.22  | ring finger protein 40, E3 ubiquitin protein ligase                 | 3.72E-02 | Y        |          |          |
| <i>Canx</i>       | -1.32 | 1.14E-03 | 1.26E-02 | 211.2        | 160.1        | 1          |                |      | 1        |       |     | -1.33 | calnexin                                                            | 4.07E-04 | Y        |          |          |
| <i>Atp5g3</i>     | -1.33 | 1.15E-03 | 1.27E-02 | 274.0        | 205.7        |            |                |      |          |       |     |       |                                                                     | 9.88E-01 | N        |          |          |
| <i>Trank1</i>     | -1.33 | 1.15E-03 | 1.27E-02 | 33.2         | 25.1         |            |                |      |          |       |     | -1.49 | tetratricopeptide repeat and ankyrin repeat containing 1 /          | 5.68E-07 | Y        |          |          |
| <i>Cat</i>        | -1.33 | 1.16E-03 | 1.28E-02 | 75.2         | 56.4         |            | 3              | 1    |          |       |     |       |                                                                     | 2.72E-01 | N        |          |          |
| <i>Omg</i>        | -1.34 | 1.16E-03 | 1.28E-02 | 80.8         | 60.5         | 1          | 1              |      | 1        |       |     | -1.36 | oligodendrocyte myelin glycoprotein                                 | 2.37E-04 | Y        |          |          |
| <i>RGD1565675</i> | -1.37 | 1.16E-03 | 1.28E-02 | 86.8         | 63.3         |            |                |      |          |       |     | -1.40 |                                                                     | 1.75E-04 | Y        |          |          |
| <i>Prosc</i>      | -1.35 | 1.16E-03 | 1.28E-02 | 65.4         | 48.4         |            | 1              |      |          |       |     | -1.42 | proline synthetase co-transcribed homolog (bacterial)               | 5.00E-05 | Y        |          |          |

Supplementary Table 1

| gene              | FC    | Pvalue   | FDR      | control RPKM | alcohol RPKM | P drinking | P vs. NP naïve | GWAS | GE in PM | AcbSh | CeA | DRN   | gene title                                                    | DRN FDR  | same dir | PAG+ ACB | PAG+ CeA |
|-------------------|-------|----------|----------|--------------|--------------|------------|----------------|------|----------|-------|-----|-------|---------------------------------------------------------------|----------|----------|----------|----------|
| <i>Slc25a46</i>   | -1.34 | 1.17E-03 | 1.28E-02 | 51.9         | 38.8         |            |                |      |          |       |     |       | solute carrier family 25, member 46                           | 3.11E-04 | Y        |          |          |
| <i>Gng7</i>       | -1.42 | 1.17E-03 | 1.28E-02 | 8.5          | 6.0          | 1          | 1              |      |          |       |     |       | guanine nucleotide binding protein (G protein), gamma 7       | 7.96E-06 | Y        |          |          |
| <i>RGD1562373</i> | -1.53 | 1.17E-03 | 1.28E-02 | 7.9          | 5.2          |            |                |      |          |       |     |       |                                                               | 2.99E-01 | N        |          |          |
| <i>Ssbp4</i>      | 1.35  | 1.19E-03 | 1.30E-02 | 37.6         | 50.9         |            |                |      |          |       |     |       | single stranded DNA binding protein 4                         | 6.20E-01 | N        |          |          |
| <i>Ypel3</i>      | 1.34  | 1.19E-03 | 1.30E-02 | 95.5         | 127.9        |            |                |      |          |       |     |       | yippee-like 3 (Drosophila)                                    | 1.17E-01 | N        |          |          |
| <i>Slc35d3</i>    | -2.05 | 1.20E-03 | 1.31E-02 | 1.0          | 0.5          |            | 2              |      |          |       |     |       | solute carrier family 35, member D3                           | 7.07E-01 | N        |          |          |
| <i>Sfrs8</i>      | 1.35  | 1.21E-03 | 1.32E-02 | 21.0         | 28.3         |            |                | 1    | 1        |       |     | 1.32  |                                                               | 2.88E-03 | Y        |          |          |
| <i>Atp2b4</i>     | -1.33 | 1.21E-03 | 1.32E-02 | 43.2         | 32.5         | 1          |                |      |          |       |     |       | ATPase, Ca <sup>++</sup> transporting, plasma membrane 4      | 3.76E-02 | Y        |          |          |
| <i>Arhgap22</i>   | -1.58 | 1.21E-03 | 1.32E-02 | 3.9          | 2.5          |            |                |      |          |       |     |       | Rho GTPase activating protein 22                              | 2.38E-01 | N        |          |          |
| <i>Ttc7</i>       | 1.37  | 1.21E-03 | 1.32E-02 | 7.4          | 10.2         | 1          |                |      |          |       |     | 1.64  |                                                               | 2.04E-07 | Y        |          |          |
| <i>Drd5</i>       | -1.72 | 1.21E-03 | 1.32E-02 | 3.6          | 2.1          |            |                | 1    |          |       |     |       | dopamine receptor D5                                          | 0.00E+00 | N        |          |          |
| <i>Myh11</i>      | 1.35  | 1.21E-03 | 1.32E-02 | 8.3          | 11.2         |            | 1              |      |          |       |     |       | myosin, heavy chain 11, smooth muscle                         | 9.33E-02 | N        |          |          |
| <i>Heyl</i>       | -1.36 | 1.23E-03 | 1.33E-02 | 13.8         | 10.2         |            | 1              |      | 1        |       |     |       | hairy/enhancer-of-split related with YRPW motif-like          | 1.72E-01 | N        |          |          |
| <i>Otx2</i>       | -1.46 | 1.23E-03 | 1.33E-02 | 7.0          | 4.8          |            |                |      |          |       |     |       | orthodenticle homeobox 2                                      | 2.85E-01 | N        |          |          |
| <i>Pank1</i>      | -1.35 | 1.23E-03 | 1.33E-02 | 31.4         | 23.3         |            | 1              |      |          |       |     |       | pantothenate kinase 1                                         | 4.88E-01 | N        |          |          |
| <i>Hspa1b</i>     | 1.45  | 1.23E-03 | 1.33E-02 | 2.2          | 3.2          | 1          |                |      | 1        |       |     | 1.43  | heat shock 70kDa protein 1B                                   | 9.93E-04 | Y        |          |          |
| <i>Tm4sf1</i>     | -1.55 | 1.24E-03 | 1.34E-02 | 5.0          | 3.3          |            | 1              |      |          |       |     |       | transmembrane 4 L six family member 1                         | 1.76E-01 | N        |          |          |
| <i>Layn</i>       | 1.64  | 1.24E-03 | 1.34E-02 | 3.5          | 5.8          |            |                |      |          |       |     | 1.44  | layilin                                                       | 9.63E-03 | Y        |          |          |
| <i>Fgr</i>        | 1.75  | 1.25E-03 | 1.34E-02 | 1.1          | 1.9          |            |                |      |          |       |     | 1.75  | Gardner-Rasheed feline sarcoma viral (v-fgr) oncogene homolog | 1.28E-02 | Y        |          |          |
| <i>Fam13b1</i>    | -1.32 | 1.25E-03 | 1.34E-02 | 67.6         | 51.1         |            | 2              |      |          |       |     |       | family with sequence similarity 13, member B1                 | 5.37E-02 | N        |          |          |
| <i>RT1-N3</i>     | 2.00  | 1.25E-03 | 1.35E-02 | 0.8          | 1.6          |            |                |      |          |       |     | 1.66  |                                                               | 1.66E-02 | Y        |          |          |
| <i>Scnm1</i>      | 1.45  | 1.26E-03 | 1.36E-02 | 11.7         | 17.0         |            |                |      |          |       |     |       | sodium channel modifier 1                                     | 8.98E-01 | N        |          |          |
| <i>Ak3l1</i>      | 1.36  | 1.28E-03 | 1.37E-02 | 56.4         | 76.9         | 1          | 1              |      |          |       |     | 1.39  | adenylate kinase 3-like 1                                     | 7.02E-04 | Y        |          |          |
| <i>Mmp17</i>      | -1.40 | 1.29E-03 | 1.38E-02 | 8.6          | 6.2          |            | 1              |      |          |       |     |       | matrix metalloproteinase 17 (membrane-inserted)               | 3.95E-07 | Y        |          |          |
| <i>Acly</i>       | -1.32 | 1.29E-03 | 1.39E-02 | 72.3         | 54.7         | 2          | 1              |      |          |       |     |       | ATP citrate lyase                                             | 1.62E-03 | Y        |          |          |
| <i>Klc4</i>       | 1.36  | 1.30E-03 | 1.39E-02 | 16.2         | 22.0         |            | 1              |      | 1        |       |     | 1.29  | kinesin light chain 4                                         | 8.15E-03 | Y        |          |          |
| <i>Map3k6</i>     | 1.65  | 1.30E-03 | 1.39E-02 | 0.9          | 1.4          |            |                |      | 1        |       |     | 2.12  | mitogen-activated protein kinase kinase kinase 6              | 6.61E-05 | Y        |          |          |
| <i>Nfib</i>       | 1.33  | 1.30E-03 | 1.39E-02 | 56.6         | 75.2         | 2          |                | 1    | 1        |       |     | 1.70  | nuclear factor I/B                                            | 8.63E-11 | Y        |          |          |
| <i>RGD1565972</i> | -2.92 | 1.30E-03 | 1.39E-02 | 0.3          | 0.1          |            |                |      |          |       |     |       |                                                               | 0.00E+00 | N        |          |          |
| <i>Disp2</i>      | -1.31 | 1.30E-03 | 1.39E-02 | 196.6        | 149.6        |            | 1              |      |          |       |     |       | dispatched homolog 2 (Drosophila)                             | 4.11E-06 | Y        |          |          |
| <i>Grb14</i>      | -1.39 | 1.33E-03 | 1.42E-02 | 17.7         | 12.7         |            | 4              |      |          |       |     |       | growth factor receptor-bound protein 14                       | 5.18E-03 | Y        |          |          |
| <i>Dpysl5</i>     | -1.34 | 1.34E-03 | 1.43E-02 | 22.3         | 16.7         | 1          |                |      | 1        |       |     |       | dihydropyrimidinase-like 5                                    | 1.02E-05 | Y        |          |          |
| <i>Gpatch4</i>    | -1.42 | 1.35E-03 | 1.44E-02 | 12.5         | 8.8          | 2          | 1              |      |          |       |     | -1.23 | G patch domain containing 4                                   | 4.73E-05 | Y        |          | Y        |
| <i>Fdps</i>       | -1.34 | 1.35E-03 | 1.44E-02 | 94.8         | 70.8         | 1          |                |      |          |       |     |       | farnesyl diphosphate synthase                                 | 1.82E-07 | Y        |          |          |
| <i>Rpp25</i>      | -1.51 | 1.36E-03 | 1.45E-02 | 8.2          | 5.4          |            |                |      |          |       |     |       | ribonuclease P/MRP 25kDa subunit                              | 8.93E-05 | Y        |          |          |
| <i>Gpr64</i>      | -1.45 | 1.36E-03 | 1.45E-02 | 4.1          | 2.8          |            | 1              |      |          |       |     |       | G protein-coupled receptor 64                                 | 1.46E-02 | Y        |          |          |
| <i>Sec31b</i>     | -1.55 | 1.37E-03 | 1.46E-02 | 2.5          | 1.6          |            |                |      |          |       |     |       | SEC31 homolog B (S. cerevisiae)                               | 7.24E-01 | N        |          |          |
| <i>RGD1560471</i> | 1.36  | 1.39E-03 | 1.47E-02 | 7.9          | 10.8         |            |                |      |          |       |     | 2.34  |                                                               | 2.00E-19 | Y        |          |          |
| <i>Wdr93</i>      | 1.47  | 1.39E-03 | 1.48E-02 | 5.0          | 7.3          |            |                |      |          |       |     | 1.51  | WD repeat domain 93                                           | 3.73E-04 | Y        |          |          |
| <i>Qsox2</i>      | 1.34  | 1.39E-03 | 1.48E-02 | 16.0         | 21.5         |            |                |      |          |       |     | 1.39  | quiescinq Q6 sulfhydryl oxidase 2                             | 2.22E-04 | Y        |          |          |
| <i>Lrrc48</i>     | 1.40  | 1.40E-03 | 1.48E-02 | 11.7         | 16.3         |            |                |      |          |       |     | 1.57  | leucine rich repeat containing 48                             | 2.66E-06 | Y        |          |          |
| <i>Trappc2</i>    | -1.35 | 1.40E-03 | 1.48E-02 | 54.8         | 40.7         |            | 1              |      |          |       |     |       | trafficking protein particle complex 2                        | 6.85E-04 | Y        |          |          |
| <i>Speq</i>       | 1.33  | 1.40E-03 | 1.48E-02 | 11.3         | 15.0         |            | 1              |      |          |       |     | 1.37  | SPEG complex locus                                            | 2.34E-04 | Y        |          |          |

Supplementary Table 1

| gene              | FC    | Pvalue   | FDR      | control RPKM | alcohol RPKM | P drinking | P vs. NP naïve | GWAS | GE in PM | AcbSh | CeA | DRN   | gene title                                                       | DRN FDR  | same dir | PAG+ ACB | PAG+ CeA |
|-------------------|-------|----------|----------|--------------|--------------|------------|----------------|------|----------|-------|-----|-------|------------------------------------------------------------------|----------|----------|----------|----------|
| <i>Slc27a3</i>    | 1.37  | 1.40E-03 | 1.48E-02 | 13.4         | 18.3         |            | 1              |      | 1        |       |     | 1.27  | solute carrier family 27 (fatty acid transporter), member 3      | 1.97E-02 | Y        |          |          |
| <i>Racgap1</i>    | 1.43  | 1.41E-03 | 1.49E-02 | 5.8          | 8.2          |            |                |      | 1        |       |     | 1.80  | Rac GTPase activating protein 1                                  | 5.60E-08 | Y        |          |          |
| <i>Plnlp</i>      | -1.65 | 1.41E-03 | 1.49E-02 | 4.3          | 2.6          | 2          |                |      |          |       |     |       | pancreatic lipase                                                | 9.17E-02 | N        |          |          |
| <i>Mtus1</i>      | 1.32  | 1.42E-03 | 1.49E-02 | 109.5        | 144.1        | 1          | 2              |      | 1        |       |     | 2.15  | microtubule associated tumor suppressor 1                        | 2.74E-23 | Y        |          |          |
| <i>Lppr5</i>      | -1.39 | 1.42E-03 | 1.49E-02 | 11.4         | 8.2          | 1          |                |      |          |       |     | -1.60 | lipid phosphate phosphatase-related protein type 5               | 1.08E-07 | Y        |          |          |
| <i>Baalc</i>      | -1.33 | 1.42E-03 | 1.50E-02 | 51.8         | 38.9         |            |                |      |          |       |     | -1.24 | brain and acute leukemia, cytoplasmic                            | 1.97E-02 | Y        |          |          |
| <i>Tcp11l2</i>    | 1.34  | 1.44E-03 | 1.51E-02 | 28.1         | 37.7         | 1          | 1              |      |          |       |     | 1.46  | t-complex 11 (mouse)-like 2                                      | 1.74E-05 | Y        |          |          |
| <i>RGD1310429</i> | -1.34 | 1.44E-03 | 1.51E-02 | 35.5         | 26.4         |            |                |      |          |       |     | -1.28 |                                                                  | 7.63E-03 | Y        |          |          |
| <i>Lingo4</i>     | -1.44 | 1.44E-03 | 1.51E-02 | 2.9          | 2.0          |            |                |      |          |       |     | 1.45  | leucine rich repeat and Ig domain containing 4                   | 7.62E-03 | N        |          |          |
| <i>LOC685045</i>  | -1.65 | 1.45E-03 | 1.52E-02 | 9.0          | 5.5          |            |                |      |          |       |     | -1.36 |                                                                  | 4.76E-02 | Y        |          |          |
| <i>Spag16</i>     | 1.85  | 1.45E-03 | 1.52E-02 | 1.8          | 3.3          |            |                |      |          |       |     | 2.23  | sperm associated antigen 16                                      | 2.37E-05 | Y        |          |          |
| <i>Epha7</i>      | 1.37  | 1.46E-03 | 1.52E-02 | 9.2          | 12.6         |            | 1              | 1    |          |       |     | 1.22  | EPH receptor A7                                                  | 4.90E-02 | Y        |          |          |
| <i>Rxrg</i>       | -1.50 | 1.46E-03 | 1.52E-02 | 6.0          | 4.0          |            | 1              |      | 1        |       |     | -1.67 | retinoid X receptor, gamma                                       | 2.68E-03 | Y        |          |          |
| <i>Kif13a</i>     | 1.32  | 1.46E-03 | 1.52E-02 | 24.3         | 32.2         |            | 1              |      |          |       |     | 1.75  | kinesin family member 13A                                        | 5.06E-12 | Y        |          |          |
| <i>P4ha3</i>      | 1.84  | 1.47E-03 | 1.53E-02 | 1.2          | 2.2          |            |                |      |          |       |     | 1.99  | prolyl 4-hydroxylase, alpha polypeptide III                      | 1.38E-03 | Y        |          |          |
| <i>Ip6k2</i>      | 1.34  | 1.47E-03 | 1.53E-02 | 38.0         | 50.9         |            | 3              |      |          |       |     |       | inositol hexakisphosphate kinase 2                               | 3.98E-01 | N        |          |          |
| <i>Lmod1</i>      | -1.40 | 1.48E-03 | 1.54E-02 | 6.7          | 4.8          |            |                |      |          |       |     | -1.32 | leiomodoin 1 (smooth muscle)                                     | 1.63E-02 | Y        |          |          |
| <i>Mcam</i>       | -1.35 | 1.48E-03 | 1.54E-02 | 23.0         | 17.0         |            |                |      |          |       |     | -1.32 | melanoma cell adhesion molecule                                  | 1.89E-03 | Y        |          |          |
| <i>Adam1a</i>     | 1.44  | 1.48E-03 | 1.54E-02 | 3.2          | 4.6          |            |                |      |          |       |     |       | a disintegrin and metallopeptidase domain 1a                     | 1.23E-01 | N        |          |          |
| <i>Kctd8</i>      | 1.35  | 1.48E-03 | 1.54E-02 | 15.6         | 21.1         |            |                |      |          |       |     |       | potassium channel tetramerisation domain containing 8            | 2.39E-01 | N        |          |          |
| <i>Reep1</i>      | -1.32 | 1.48E-03 | 1.54E-02 | 58.6         | 44.3         |            | 1              |      |          |       |     | -1.52 | receptor accessory protein 1                                     | 1.29E-07 | Y        |          |          |
| <i>Aldh1a2</i>    | 1.53  | 1.48E-03 | 1.54E-02 | 2.9          | 4.5          |            |                |      |          |       |     | 1.43  | aldehyde dehydrogenase 1 family, member A2                       | 4.96E-03 | Y        |          |          |
| <i>Sphkap</i>     | 1.31  | 1.49E-03 | 1.54E-02 | 101.5        | 133.2        |            | 1              |      |          |       |     | 2.32  | SPHK1 interactor, AKAP domain containing                         | 5.74E-28 | Y        |          |          |
| <i>Fgf11</i>      | 1.50  | 1.49E-03 | 1.54E-02 | 11.3         | 17.0         |            |                |      |          |       |     | 1.58  | fibroblast growth factor 11                                      | 5.74E-04 | Y        |          |          |
| <i>Lrrc10b</i>    | 1.64  | 1.49E-03 | 1.54E-02 | 3.2          | 5.2          |            |                |      |          |       |     | 1.49  |                                                                  | 1.49E-02 | Y        |          |          |
| <i>Lass2</i>      | -1.35 | 1.49E-03 | 1.54E-02 | 32.5         | 24.0         |            |                |      |          |       |     |       |                                                                  | 1.33E-01 | N        |          |          |
| <i>Cecr2</i>      | 1.36  | 1.49E-03 | 1.54E-02 | 8.2          | 11.2         |            |                |      |          |       |     | 1.76  | cat eye syndrome chromosome region, candidate 2                  | 2.61E-09 | Y        |          |          |
| <i>Cdo1</i>       | -1.35 | 1.50E-03 | 1.54E-02 | 41.8         | 30.9         |            |                |      | 1        |       |     |       | cysteine dioxygenase, type I                                     | 2.63E-01 | N        |          |          |
| <i>Pctk1</i>      | 1.32  | 1.50E-03 | 1.54E-02 | 108.6        | 142.9        | 1          |                |      |          |       |     | 1.31  |                                                                  | 1.41E-03 | Y        |          |          |
| <i>Stk36</i>      | 1.36  | 1.50E-03 | 1.54E-02 | 7.4          | 10.0         |            |                |      |          |       |     | 1.65  | serine/threonine kinase 36                                       | 5.87E-08 | Y        |          |          |
| <i>Cacna1a</i>    | 1.31  | 1.52E-03 | 1.57E-02 | 55.8         | 73.3         |            |                |      |          |       |     | 1.53  | calcium channel, voltage-dependent, P/Q type, alpha 1A subunit / | 6.73E-08 | Y        |          |          |
| <i>Kcnmb4</i>     | 1.46  | 1.54E-03 | 1.58E-02 | 10.4         | 15.2         |            |                |      |          |       |     | 1.44  | potassium large conductance calcium-activated channel, subfamily | 4.39E-03 | Y        |          |          |
| <i>Bcl7b</i>      | 1.38  | 1.54E-03 | 1.58E-02 | 18.6         | 25.7         |            |                |      |          |       |     |       | B-cell CLL/lymphoma 7B                                           | 2.33E-01 | N        |          |          |
| <i>Scn2b</i>      | 1.32  | 1.54E-03 | 1.58E-02 | 180.6        | 238.5        | 1          | 3              |      |          |       |     |       | sodium channel, voltage-gated, type II, beta subunit             | 4.10E-01 | N        |          |          |
| <i>Grip2</i>      | -1.34 | 1.55E-03 | 1.58E-02 | 17.6         | 13.2         |            | 1              |      |          |       |     | -1.58 | glutamate receptor interacting protein 2                         | 1.51E-08 | Y        |          |          |
| <i>Dnajb9</i>     | -1.36 | 1.55E-03 | 1.58E-02 | 28.5         | 21.1         |            | 1              |      |          |       |     |       | DnaJ (Hsp40) homolog, subfamily B, member 9                      | 1.17E-01 | N        |          |          |
| <i>Gstt3</i>      | -1.37 | 1.55E-03 | 1.59E-02 | 23.2         | 16.9         |            | 1              |      |          |       |     | -1.29 |                                                                  | 1.21E-02 | Y        |          |          |

Supplementary Table 1

| gene              | FC    | Pvalue   | FDR      | control RPKM | alcohol RPKM | P drinking | P vs. NP naïve | GWAS | GE in PM | AcbSh | CeA | DRN  | gene title | DRN FDR                                                           | same dir | PAG+ ACB | PAG+ CeA |   |
|-------------------|-------|----------|----------|--------------|--------------|------------|----------------|------|----------|-------|-----|------|------------|-------------------------------------------------------------------|----------|----------|----------|---|
| <i>Dlgap3</i>     | 1.34  | 1.57E-03 | 1.61E-02 | 15.5         | 20.8         | 1          | 1              |      |          |       |     | 1.15 | 1.34       | discs, large (Drosophila) homolog-associated protein 3            | 1.75E-03 | Y        |          | Y |
| <i>Serping1</i>   | -1.41 | 1.57E-03 | 1.61E-02 | 14.3         | 10.1         |            | 1              |      | 1        |       |     |      | 1.34       | serpin peptidase inhibitor, clade G (C1 inhibitor), member 1 //   | 1.28E-02 | N        |          |   |
| <i>Tarsl2</i>     | -1.50 | 1.58E-03 | 1.61E-02 | 6.0          | 4.0          |            |                |      |          |       |     |      |            | threonyl-tRNA synthetase-like 2                                   | 2.20E-01 | N        |          |   |
| <i>Fam69a</i>     | -1.34 | 1.58E-03 | 1.62E-02 | 34.0         | 25.4         |            |                |      |          |       |     |      |            | family with sequence similarity 69, member A                      | 7.75E-02 | N        |          |   |
| <i>Prr16</i>      | -1.40 | 1.60E-03 | 1.63E-02 | 8.5          | 6.1          |            |                |      |          | 1     |     |      |            | proline rich 16                                                   | 5.86E-01 | N        |          |   |
| <i>MGC114520</i>  | 1.70  | 1.60E-03 | 1.63E-02 | 1.9          | 3.3          |            |                |      |          |       |     |      | 1.98       |                                                                   | 3.25E-05 | Y        |          |   |
| <i>Enah</i>       | -1.33 | 1.61E-03 | 1.64E-02 | 52.2         | 39.2         | 1          |                |      |          |       |     |      |            | enabled homolog (Drosophila)                                      | 2.58E-01 | N        |          |   |
| <i>LOC500413</i>  | -1.45 | 1.62E-03 | 1.65E-02 | 10.6         | 7.3          |            |                |      |          |       |     |      | -1.50      |                                                                   | 1.21E-04 | Y        |          |   |
| <i>Znf598</i>     | 1.33  | 1.62E-03 | 1.65E-02 | 28.0         | 37.2         |            |                |      |          |       |     |      | 1.24       | zinc finger protein 598                                           | 1.99E-02 | Y        |          |   |
| <i>Mir349</i>     | 1.65  | 1.63E-03 | 1.66E-02 | 36.7         | 60.7         |            |                |      |          |       |     |      |            |                                                                   | 7.61E-02 | N        |          |   |
| <i>Htr4</i>       | -1.48 | 1.63E-03 | 1.66E-02 | 10.9         | 7.4          | 1          | 1              |      |          |       |     |      | -1.80      | 5-hydroxytryptamine (serotonin) receptor 4, G protein-coupled     | 2.48E-05 | Y        |          |   |
| <i>Rps6ka2</i>    | -1.34 | 1.64E-03 | 1.66E-02 | 13.4         | 10.0         | 2          |                |      |          | 2     |     |      | -1.36      | ribosomal protein S6 kinase, 90kDa, polypeptide 2                 | 4.50E-04 | Y        |          |   |
| <i>Asmt</i>       | 2.55  | 1.64E-03 | 1.66E-02 | 0.4          | 1.0          |            |                |      |          |       |     |      | 2.01       | acetylserotonin O-methyltransferase                               | 3.94E-02 | Y        |          |   |
| <i>Cdh10</i>      | -1.35 | 1.64E-03 | 1.66E-02 | 19.7         | 14.6         |            |                |      |          |       |     |      | -1.29      | cadherin 10, type 2 (T2-cadherin)                                 | 5.50E-03 | Y        |          |   |
| <i>Fhdc1</i>      | -1.38 | 1.67E-03 | 1.69E-02 | 8.3          | 6.0          |            |                |      |          |       |     |      | -1.26      | FH2 domain containing 1                                           | 3.34E-02 | Y        |          |   |
| <i>Rnase4</i>     | -1.35 | 1.67E-03 | 1.69E-02 | 42.6         | 31.6         |            |                |      |          |       |     |      |            |                                                                   | 9.50E-01 | N        |          |   |
| <i>Olfm1</i>      | 1.31  | 1.68E-03 | 1.70E-02 | 85.8         | 112.7        |            | 1              |      |          |       |     |      | 1.46       | olfactomedin 1                                                    | 3.70E-06 | Y        |          |   |
| <i>Pam</i>        | -1.31 | 1.69E-03 | 1.70E-02 | 71.4         | 54.3         | 1          | 1              |      |          |       |     |      | -1.42      | peptidylglycine alpha-amidating monooxygenase                     | 1.71E-05 | Y        |          |   |
| <i>Angpt2</i>     | 1.67  | 1.69E-03 | 1.71E-02 | 1.5          | 2.5          |            |                |      |          |       |     |      | 1.45       | angiopoietin 2                                                    | 1.41E-02 | Y        |          |   |
| <i>Lgi3</i>       | -1.31 | 1.70E-03 | 1.71E-02 | 105.1        | 80.2         |            | 1              |      |          | 1     |     |      | -1.22      | leucine-rich repeat LGI family, member 3                          | 2.58E-02 | Y        |          |   |
| <i>Plip</i>       | -1.35 | 1.71E-03 | 1.72E-02 | 37.6         | 27.8         | 1          |                |      |          | 1     |     |      | -1.24      | plasmolipin                                                       | 3.69E-02 | Y        |          |   |
| <i>Fam18b2</i>    | -1.46 | 1.74E-03 | 1.75E-02 | 8.6          | 5.9          |            |                |      |          |       |     |      | -1.22      | family with sequence similarity 18, member B2                     | 1.93E-02 | Y        |          |   |
| <i>Glrx1</i>      | -1.38 | 1.75E-03 | 1.76E-02 | 27.7         | 20.1         |            |                |      |          |       |     |      |            |                                                                   | 1.31E-01 | N        |          |   |
| <i>Cherp</i>      | 1.35  | 1.75E-03 | 1.76E-02 | 11.4         | 15.4         |            |                |      |          |       |     |      | 1.33       | calcium homeostasis endoplasmic reticulum protein                 | 3.35E-03 | Y        |          |   |
| <i>Zdhhc22</i>    | -1.44 | 1.76E-03 | 1.76E-02 | 15.3         | 10.6         | 1          |                |      |          |       |     |      | -1.43      | zinc finger, DHHC-type containing 22                              | 4.68E-04 | Y        |          |   |
| <i>Fam117a</i>    | 1.44  | 1.76E-03 | 1.76E-02 | 4.9          | 7.0          |            |                |      |          |       |     |      | 2.20       | family with sequence similarity 117, member A                     | 3.68E-11 | Y        |          |   |
| <i>Acot7</i>      | -1.31 | 1.76E-03 | 1.76E-02 | 155.8        | 118.6        |            |                |      |          | 1     |     |      | -1.42      | acyl-CoA thioesterase 7                                           | 1.22E-05 | Y        |          |   |
| <i>Fundc1</i>     | -1.35 | 1.76E-03 | 1.76E-02 | 30.1         | 22.3         |            |                |      |          |       |     |      | -1.37      | FUN14 domain containing 1                                         | 4.50E-04 | Y        |          |   |
| <i>Bat5</i>       | 1.32  | 1.77E-03 | 1.77E-02 | 58.6         | 77.4         | 2          |                |      |          |       |     |      | 1.42       | HLA-B associated transcript 5                                     | 3.04E-05 | Y        |          |   |
| <i>Znf524</i>     | 1.66  | 1.78E-03 | 1.78E-02 | 3.4          | 5.6          | 1          |                |      |          |       |     |      | -1.12      | zinc finger protein 524                                           | 6.17E-01 | N        |          | Y |
| <i>Abca7</i>      | 1.33  | 1.79E-03 | 1.78E-02 | 12.1         | 16.1         |            | 1              |      |          |       |     |      |            | ATP-binding cassette, sub-family A (ABC1), member 7               | 1.47E-01 | N        |          |   |
| <i>Pcbd1</i>      | -1.42 | 1.81E-03 | 1.80E-02 | 26.2         | 18.4         |            | 1              |      |          |       |     |      | -1.68      | pterin-4 alpha-carbinolamine dehydratase/dimerization cofactor of | 3.98E-08 | Y        |          |   |
| <i>RGD1561852</i> | -1.46 | 1.83E-03 | 1.82E-02 | 12.1         | 8.3          |            |                |      |          |       |     |      |            |                                                                   | 8.22E-01 | N        |          |   |
| <i>Prima1</i>     | -1.42 | 1.85E-03 | 1.84E-02 | 6.0          | 4.3          |            |                |      |          |       |     |      |            | proline rich membrane anchor 1                                    | 2.21E-01 | N        |          |   |
| <i>Stk11</i>      | 1.33  | 1.85E-03 | 1.84E-02 | 20.5         | 27.2         |            |                |      |          |       |     |      | 1.26       | serine/threonine kinase 11                                        | 1.40E-02 | Y        |          |   |
| <i>Cdkl2</i>      | -1.38 | 1.85E-03 | 1.84E-02 | 15.2         | 11.0         |            |                |      |          |       |     |      | -1.47      | cyclin-dependent kinase-like 2 (CDC2-related kinase)              | 5.68E-05 | Y        |          |   |
| <i>Pcdh8</i>      | -1.38 | 1.87E-03 | 1.86E-02 | 11.3         | 8.2          |            |                |      |          |       |     |      | -1.44      | protocadherin 8                                                   | 1.03E-04 | Y        |          |   |
| <i>Klhl25</i>     | 1.37  | 1.87E-03 | 1.86E-02 | 7.5          | 10.3         |            |                |      |          |       |     |      | 1.31       | kelch-like 25 (Drosophila)                                        | 8.70E-03 | Y        |          |   |

Supplementary Table 1

| gene              | FC    | Pvalue   | FDR      | control RPKM | alcohol RPKM | P drinking | P vs. NP naïve | GWAS | GE in PM | AcbSh | CeA  | DRN   | gene title                                                                                                  | DRN FDR  | same dir | PAG+ ACB | PAG+ CeA |
|-------------------|-------|----------|----------|--------------|--------------|------------|----------------|------|----------|-------|------|-------|-------------------------------------------------------------------------------------------------------------|----------|----------|----------|----------|
| <i>Mfsd2</i>      | -1.36 | 1.87E-03 | 1.86E-02 | 20.0         | 14.7         | 1          |                |      |          |       |      |       |                                                                                                             | 1.11E-01 | N        |          |          |
| <i>Nap1l2</i>     | -1.32 | 1.88E-03 | 1.86E-02 | 74.5         | 56.6         | 1          |                |      |          |       |      | -1.27 | nucleosome assembly protein 1-like 2                                                                        | 6.13E-03 | Y        |          |          |
| <i>Pold1</i>      | 1.52  | 1.88E-03 | 1.86E-02 | 1.9          | 3.0          | 1          |                |      |          |       |      | 2.03  | polymerase (DNA directed), delta 1, catalytic subunit                                                       | 5.74E-07 | Y        |          |          |
| <i>Chst1</i>      | -1.32 | 1.88E-03 | 1.86E-02 | 66.2         | 50.2         | 1          | 1              |      |          |       |      | -1.34 | carbohydrate (keratan sulfate Gal-6) sulfotransferase 1                                                     | 5.69E-04 | Y        |          |          |
| <i>Zfp395</i>     | 1.34  | 1.88E-03 | 1.86E-02 | 13.6         | 18.2         |            | 1              |      |          |       |      | 1.35  |                                                                                                             | 1.37E-03 | Y        |          |          |
| <i>Cdc42ep4</i>   | 1.37  | 1.88E-03 | 1.86E-02 | 8.9          | 12.1         |            |                |      |          |       |      | 1.70  | CDC42 effector protein (Rho GTPase binding) 4                                                               | 3.92E-08 | Y        |          |          |
| <i>Pgr15l</i>     | -1.55 | 1.89E-03 | 1.86E-02 | 5.3          | 3.4          |            |                |      |          |       |      |       |                                                                                                             | 4.63E-01 | N        |          |          |
| <i>Tpm2</i>       | 1.65  | 1.90E-03 | 1.87E-02 | 3.4          | 5.6          |            | 1              |      |          |       |      |       |                                                                                                             | 7.48E-01 | N        |          |          |
| <i>RGD1565283</i> | 1.82  | 1.91E-03 | 1.88E-02 | 2.6          | 4.7          |            |                |      |          |       |      | 2.09  |                                                                                                             | 2.22E-04 | Y        |          |          |
| <i>Anxa11</i>     | 1.34  | 1.91E-03 | 1.88E-02 | 24.2         | 32.3         |            | 3              |      |          |       |      | 1.75  | annexin A11                                                                                                 | 1.00E-10 | Y        |          |          |
| <i>B3galt6</i>    | -1.40 | 1.94E-03 | 1.91E-02 | 11.1         | 7.9          |            |                |      |          |       |      |       |                                                                                                             | 5.03E-02 | N        |          |          |
| <i>Cblb</i>       | 1.33  | 1.95E-03 | 1.91E-02 | 19.3         | 25.7         |            |                |      |          |       |      | 1.41  | UDP-Gal:betaGal beta 1,3-galactosyltransferase polypeptid Cbl proto-oncogene, E3 ubiquitin protein ligase B | 1.10E-04 | Y        |          |          |
| <i>Stox2</i>      | -1.31 | 1.96E-03 | 1.92E-02 | 45.5         | 34.7         |            |                |      |          |       |      | -1.20 | storkhead box 2                                                                                             | 4.04E-02 | Y        |          |          |
| <i>Ttc25</i>      | 1.49  | 1.96E-03 | 1.93E-02 | 3.4          | 5.1          |            |                |      | 1        |       |      | 2.15  | tetratricopeptide repeat domain 25                                                                          | 3.75E-10 | Y        |          |          |
| <i>Spsb4</i>      | -1.60 | 1.97E-03 | 1.93E-02 | 2.4          | 1.5          |            | 1              |      |          |       |      |       | splA/ryanodine receptor domain and SOCS box containing 4                                                    | 1.12E-01 | N        |          |          |
| <i>Atf7</i>       | 1.33  | 1.97E-03 | 1.93E-02 | 30.4         | 40.4         |            |                |      |          |       |      | 1.65  | activating transcription factor 7                                                                           | 6.41E-09 | Y        |          |          |
| <i>Ubr7</i>       | -1.34 | 1.98E-03 | 1.94E-02 | 16.9         | 12.6         |            |                |      |          |       |      |       | ubiquitin protein ligase E3 component n-recognin 7 (putative)                                               | 8.20E-01 | N        |          |          |
| <i>RGD1563349</i> | -1.34 | 1.99E-03 | 1.94E-02 | 12.9         | 9.6          |            |                |      |          |       |      | -1.43 |                                                                                                             | 2.92E-05 | Y        |          |          |
| <i>MGC114464</i>  | -1.37 | 2.01E-03 | 1.96E-02 | 22.9         | 16.7         |            |                |      |          |       |      | -1.42 |                                                                                                             | 2.08E-04 | Y        |          |          |
| <i>Kcnt1</i>      | 1.31  | 2.02E-03 | 1.97E-02 | 63.6         | 83.2         | 2          | 1              |      |          |       | 1.18 | 1.74  | potassium channel, subfamily T, member 1                                                                    | 5.11E-12 | Y        |          | Y        |
| <i>RGD1359634</i> | 1.41  | 2.02E-03 | 1.97E-02 | 10.6         | 15.0         |            |                |      |          |       |      |       |                                                                                                             | 6.78E-02 | N        |          |          |
| <i>Thrsp</i>      | -1.34 | 2.02E-03 | 1.97E-02 | 44.8         | 33.4         |            | 3              |      |          |       |      |       |                                                                                                             | 5.24E-01 | N        |          |          |
| <i>RGD1309537</i> | 1.38  | 2.04E-03 | 1.98E-02 | 20.6         | 28.6         |            |                |      |          |       |      |       |                                                                                                             | 8.51E-02 | N        |          |          |
| <i>MyI9</i>       | 1.44  | 2.05E-03 | 1.99E-02 | 10.5         | 15.2         |            |                |      |          |       |      | 1.43  | myosin, light chain 9, regulatory                                                                           | 1.86E-03 | Y        |          |          |
| <i>St8sia4</i>    | -1.46 | 2.05E-03 | 1.99E-02 | 5.7          | 3.9          |            |                | 1    |          |       |      | -1.27 | ST8 alpha-N-acetyl-neuraminide alpha-2,8-sialyltransferase 4                                                | 2.16E-02 | Y        |          |          |
| <i>St3gal2</i>    | 1.31  | 2.05E-03 | 2.00E-02 | 53.3         | 69.8         |            | 1              |      |          |       |      | 1.40  | ST3 beta-galactoside alpha-2,3-sialyltransferase 2                                                          | 6.18E-05 | Y        |          |          |
| <i>Ppl</i>        | 1.46  | 2.06E-03 | 2.00E-02 | 1.5          | 2.1          |            |                |      |          |       |      | 2.17  | periplakin                                                                                                  | 2.27E-10 | Y        |          |          |
| <i>Tacr3</i>      | 1.36  | 2.07E-03 | 2.01E-02 | 12.2         | 16.7         | 1          |                |      |          |       |      | 1.34  | tachykinin receptor 3                                                                                       | 5.33E-03 | Y        |          |          |
| <i>Scml4</i>      | -1.38 | 2.08E-03 | 2.01E-02 | 6.3          | 4.6          |            |                |      |          |       |      | -1.33 | sex comb on midleg-like 4 (Drosophila)                                                                      | 1.23E-02 | Y        |          |          |
| <i>Znf286a</i>    | -1.44 | 2.09E-03 | 2.02E-02 | 5.2          | 3.6          |            |                |      |          |       |      | -1.33 | zinc finger protein 286A                                                                                    | 1.62E-02 | Y        |          |          |
| <i>Rhobtb3</i>    | -1.36 | 2.10E-03 | 2.03E-02 | 8.0          | 5.9          | 1          |                |      | 1        |       |      |       | Rho-related BTB domain containing 3                                                                         | 4.50E-01 | N        |          |          |
| <i>Zmat3</i>      | -1.30 | 2.11E-03 | 2.04E-02 | 267.6        | 205.1        |            | 1              |      | 1        |       |      | -1.29 | zinc finger, matrin-type 3                                                                                  | 2.53E-03 | Y        |          |          |
| <i>Rab11fip1</i>  | 1.45  | 2.11E-03 | 2.04E-02 | 1.3          | 1.9          |            |                |      |          |       |      | 1.90  | RAB11 family interacting protein 1 (class I)                                                                | 1.73E-08 | Y        |          |          |
| <i>Ube2ql1</i>    | -1.32 | 2.13E-03 | 2.05E-02 | 43.7         | 33.1         |            | 1              |      |          |       |      | -1.24 |                                                                                                             | 1.73E-02 | Y        |          |          |
| <i>Hsd17b14</i>   | 2.25  | 2.13E-03 | 2.05E-02 | 1.1          | 2.4          |            |                |      |          |       |      |       |                                                                                                             | 4.39E-01 | N        |          |          |
| <i>Cdh6</i>       | -1.37 | 2.13E-03 | 2.05E-02 | 9.6          | 7.0          |            |                |      |          |       |      | -1.40 | cadherin 6, type 2, K-cadherin (fetal kidney)                                                               | 2.40E-04 | Y        |          |          |

Supplementary Table 1

| gene              | FC    | Pvalue   | FDR      | control RPKM | alcohol RPKM | P drinking | P vs. NP naïve | GWAS | GE in PM | AcbSh | CeA | DRN   | gene title                                                           | DRN FDR  | same dir | PAG+ ACB | PAG+ CeA |
|-------------------|-------|----------|----------|--------------|--------------|------------|----------------|------|----------|-------|-----|-------|----------------------------------------------------------------------|----------|----------|----------|----------|
| <i>Id3</i>        | 1.48  | 2.13E-03 | 2.05E-02 | 8.4          | 12.4         |            |                |      |          |       |     |       | inhibitor of DNA binding 3, dominant negative helix-loop-helix prote | 6.35E-02 | N        |          |          |
| <i>RGD1304952</i> | -1.32 | 2.15E-03 | 2.07E-02 | 49.2         | 37.3         |            |                |      |          |       |     | -1.31 |                                                                      | 2.29E-03 | Y        |          |          |
| <i>Col9a2</i>     | 1.37  | 2.15E-03 | 2.07E-02 | 8.0          | 11.0         |            |                |      |          |       |     | 1.72  | collagen, type IX, alpha 2                                           | 2.92E-06 | Y        |          |          |
| <i>Atf3</i>       | 2.24  | 2.17E-03 | 2.09E-02 | 0.5          | 1.0          | 2          |                |      | 1        | 1.79  |     | 2.96  | activating transcription factor 3                                    | 3.21E-05 | Y        | Y        |          |
| <i>Rasgrp3</i>    | -1.37 | 2.17E-03 | 2.09E-02 | 8.0          | 5.9          |            |                |      | 1        |       |     |       | RAS guanyl releasing protein 3 (calcium and DAG-regulated)           | 1.61E-01 | N        |          |          |
| <i>Rhoq</i>       | -1.34 | 2.18E-03 | 2.09E-02 | 13.5         | 10.0         |            | 1              |      |          |       |     | -1.24 | ras homolog family member Q                                          | 2.41E-02 | Y        |          |          |
| <i>Rhov</i>       | -1.39 | 2.18E-03 | 2.09E-02 | 15.9         | 11.5         |            | 1              |      |          |       |     | -1.31 | ras homolog family member V                                          | 8.52E-03 | Y        |          |          |
| <i>Cyp2s1</i>     | -1.64 | 2.19E-03 | 2.09E-02 | 2.2          | 1.3          |            |                |      |          |       |     |       | cytochrome P450, family 2, subfamily S, polypeptide 1                | 5.75E-02 | N        |          |          |
| <i>Cacng8</i>     | -1.44 | 2.19E-03 | 2.10E-02 | 11.6         | 8.0          |            |                |      |          |       |     | -1.39 | calcium channel, voltage-dependent, gamma subunit 8                  | 4.29E-03 | Y        |          |          |
| <i>Nrbp2</i>      | 1.30  | 2.20E-03 | 2.10E-02 | 139.5        | 181.6        |            | 1              |      |          |       |     | 1.20  | nuclear receptor binding protein 2                                   | 3.68E-02 | Y        |          |          |
| <i>Metrn</i>      | 1.33  | 2.20E-03 | 2.10E-02 | 63.9         | 84.9         |            |                |      |          |       |     | 1.58  | meteorin, glial cell differentiation regulator                       | 1.21E-07 | Y        |          |          |
| <i>Adamts1</i>    | 1.44  | 2.20E-03 | 2.10E-02 | 2.5          | 3.6          | 1          | 1              |      |          |       |     | 1.66  | ADAM metalloproteinase with thrombospondin type 1 motif, 1           | 6.19E-06 | Y        |          |          |
| <i>Caln1</i>      | 1.33  | 2.21E-03 | 2.11E-02 | 73.6         | 97.7         |            |                |      |          |       |     | 2.33  | calneuron 1                                                          | 2.74E-20 | Y        |          |          |
| <i>Sccpdh</i>     | -1.32 | 2.21E-03 | 2.11E-02 | 76.7         | 58.2         |            |                |      |          |       |     | -1.34 | saccharopine dehydrogenase (putative)                                | 7.33E-04 | Y        |          |          |
| <i>Mgat3</i>      | 1.31  | 2.24E-03 | 2.13E-02 | 63.7         | 83.3         |            |                |      |          |       |     | 1.25  | mannosyl (beta-1,4)-glycoprotein beta-1,4-N-acetylglucosaminyltrans  | 1.37E-02 | Y        |          |          |
| <i>Tmed7</i>      | -1.31 | 2.24E-03 | 2.13E-02 | 69.8         | 53.4         | 1          |                |      |          |       |     | -1.20 |                                                                      | 4.48E-02 | Y        |          |          |
| <i>Doc2g</i>      | 1.69  | 2.24E-03 | 2.13E-02 | 1.9          | 3.3          |            |                |      |          |       |     |       | double C2, gamma                                                     | 5.03E-02 | N        |          |          |
| <i>Tyro3</i>      | 1.30  | 2.26E-03 | 2.14E-02 | 68.4         | 89.1         |            | 1              |      |          |       |     | 1.47  | TYRO3 protein tyrosine kinase                                        | 2.90E-06 | Y        |          |          |
| <i>Epn3</i>       | 1.38  | 2.26E-03 | 2.14E-02 | 5.3          | 7.3          |            |                |      |          |       |     | 2.36  | epsin 3                                                              | 3.21E-14 | Y        |          |          |
| <i>Gfod1</i>      | 1.34  | 2.29E-03 | 2.18E-02 | 32.7         | 43.6         |            |                |      |          |       |     | 1.89  | glucose-fructose oxidoreductase domain containing 1                  | 6.50E-13 | Y        |          |          |
| <i>Elk1</i>       | 1.33  | 2.30E-03 | 2.18E-02 | 16.7         | 22.3         |            |                |      |          |       |     | 1.46  | ELK1, member of ETS oncogene family                                  | 6.22E-05 | Y        |          |          |
| <i>Myom2</i>      | 1.62  | 2.30E-03 | 2.18E-02 | 0.8          | 1.3          |            |                |      |          |       |     | 2.15  | myomesin (M-protein) 2, 165kDa                                       | 4.42E-05 | Y        |          |          |
| <i>Ndfip1</i>     | -1.30 | 2.30E-03 | 2.18E-02 | 395.8        | 305.0        |            |                |      |          |       |     | -1.36 | Nedd4 family interacting protein 1                                   | 1.27E-04 | Y        |          |          |
| <i>Nr1h3</i>      | 1.43  | 2.30E-03 | 2.18E-02 | 7.6          | 10.9         | 1          |                |      |          |       |     | 1.61  | nuclear receptor subfamily 1, group H, member 3                      | 8.92E-05 | Y        |          |          |
| <i>Tox3</i>       | -1.43 | 2.31E-03 | 2.18E-02 | 5.9          | 4.1          |            |                |      |          |       |     | -1.51 | TOX high mobility group box family member 3                          | 8.00E-05 | Y        |          |          |
| <i>Rilpl2</i>     | 1.41  | 2.31E-03 | 2.18E-02 | 10.2         | 14.5         |            |                |      |          |       |     | 1.33  | Rab interacting lysosomal protein-like 2                             | 1.22E-02 | Y        |          |          |
| <i>Sv2b</i>       | 1.30  | 2.32E-03 | 2.19E-02 | 61.8         | 80.4         |            | 1              |      |          |       |     | 1.28  | synaptic vesicle glycoprotein 2B                                     | 3.81E-03 | Y        |          |          |
| <i>Clk2</i>       | 1.34  | 2.32E-03 | 2.19E-02 | 23.4         | 31.4         |            |                |      | 1        |       |     | 1.37  | CDC-like kinase 2                                                    | 1.15E-03 | Y        |          |          |
| <i>Ckb</i>        | 1.30  | 2.32E-03 | 2.19E-02 | 721.6        | 935.6        | 3          |                |      |          |       |     | 1.37  | creatine kinase, brain                                               | 9.61E-05 | Y        |          |          |
| <i>Polh</i>       | 1.38  | 2.33E-03 | 2.19E-02 | 6.0          | 8.2          |            |                |      |          |       |     | 1.27  | polymerase (DNA directed), eta                                       | 3.77E-02 | Y        |          |          |
| <i>Rem2</i>       | 1.57  | 2.35E-03 | 2.21E-02 | 2.7          | 4.2          | 1          | 1              |      |          |       |     | 1.81  | RAS (RAD and GEM)-like GTP binding 2                                 | 1.20E-03 | Y        |          |          |
| <i>Nol3</i>       | -1.42 | 2.36E-03 | 2.22E-02 | 11.4         | 8.0          | 1          | 1              |      | 1        |       |     | -1.47 | nucleolar protein 3 (apoptosis repressor with CARD domain)           | 1.57E-04 | Y        |          |          |
| <i>Gal3st3</i>    | 1.36  | 2.37E-03 | 2.23E-02 | 12.7         | 17.2         |            |                |      |          |       |     | 1.58  | galactose-3-O-sulfotransferase 3                                     | 3.01E-06 | Y        |          |          |
| <i>Eif2c1</i>     | -1.32 | 2.39E-03 | 2.24E-02 | 22.2         | 16.8         |            |                |      |          |       |     |       | eukaryotic translation initiation factor 2C, 1                       | 3.94E-01 | N        |          |          |
| <i>Cdig2</i>      | -1.31 | 2.39E-03 | 2.24E-02 | 36.9         | 28.2         |            |                |      |          |       |     |       | Cdig2 protein                                                        | 1.34E-01 | N        |          |          |
| <i>Cmas</i>       | -1.32 | 2.39E-03 | 2.24E-02 | 54.3         | 41.2         |            |                |      |          |       |     | -1.41 | cytidine monophosphate N-acetylneuraminic acid synthetase            | 5.50E-05 | Y        |          |          |
| <i>Tdrd5</i>      | -1.69 | 2.40E-03 | 2.24E-02 | 1.4          | 0.8          |            |                |      |          |       |     | -1.45 | tudor domain containing 5                                            | 1.66E-02 | Y        |          |          |

Supplementary Table 1

| gene              | FC    | Pvalue   | FDR      | control RPKM | alcohol RPKM | P drinking | P vs. NP naïve | GWAS | GE in PM | AcbSh | CeA | DRN   | gene title                                                                                           | DRN FDR  | same dir | PAG+ ACB | PAG+ CeA |
|-------------------|-------|----------|----------|--------------|--------------|------------|----------------|------|----------|-------|-----|-------|------------------------------------------------------------------------------------------------------|----------|----------|----------|----------|
| <i>Tect2</i>      | 1.36  | 2.41E-03 | 2.25E-02 | 10.8         | 14.7         |            |                |      |          |       |     | 1.39  |                                                                                                      | 8.61E-04 | Y        |          |          |
| <i>Tarbp2</i>     | 1.38  | 2.41E-03 | 2.25E-02 | 24.7         | 34.2         |            |                |      |          |       |     |       | TAR (HIV-1) RNA binding protein 2                                                                    | 3.34E-01 | N        |          |          |
| <i>Eln</i>        | 1.44  | 2.42E-03 | 2.26E-02 | 2.8          | 4.0          |            |                |      |          |       |     | 1.42  | elastin                                                                                              | 1.25E-02 | Y        |          |          |
| <i>RGD1309139</i> | 1.55  | 2.43E-03 | 2.27E-02 | 2.1          | 3.3          |            |                |      |          |       |     | 1.83  |                                                                                                      | 3.45E-05 | Y        |          |          |
| <i>Cnp</i>        | -1.30 | 2.44E-03 | 2.27E-02 | 282.8        | 218.3        |            |                |      | 2        |       |     | -1.25 | 2',3'-cyclic nucleotide 3' phosphodiesterase                                                         | 9.57E-03 | Y        |          |          |
| <i>Sema3c</i>     | -1.37 | 2.44E-03 | 2.27E-02 | 6.1          | 4.4          |            | 1              | 1    |          |       |     | -1.29 | sema domain, immunoglobulin domain (Ig), short basic domain, secr                                    | 7.78E-03 | Y        |          |          |
| <i>Capza1</i>     | -1.31 | 2.45E-03 | 2.28E-02 | 54.5         | 41.7         |            | 1              |      |          |       |     | -1.43 | capping protein (actin filament) muscle Z-line, alpha 1                                              | 1.06E-05 | Y        |          |          |
| <i>Clip3</i>      | 1.30  | 2.45E-03 | 2.28E-02 | 214.8        | 278.6        |            |                |      |          |       |     | 1.28  | CAP-GLY domain containing linker protein 3 sulfotransferase family, cytosolic, 1A, phenol-preferring | 3.50E-03 | Y        |          |          |
| <i>Sult1a1</i>    | -1.42 | 2.47E-03 | 2.29E-02 | 13.9         | 9.8          |            | 1              |      |          |       |     |       |                                                                                                      | 9.81E-01 | N        |          |          |
| <i>Ubxn11</i>     | 1.38  | 2.47E-03 | 2.29E-02 | 11.6         | 16.0         |            | 1              |      |          |       |     | 1.58  | UBX domain protein 11                                                                                | 5.88E-06 | Y        |          |          |
| <i>Ccdc8</i>      | 1.44  | 2.47E-03 | 2.30E-02 | 3.1          | 4.4          |            |                |      |          |       |     | 1.56  | coiled-coil domain containing 8                                                                      | 3.24E-04 | Y        |          |          |
| <i>Gpr139</i>     | -1.73 | 2.48E-03 | 2.30E-02 | 4.1          | 2.4          |            |                |      |          |       |     |       | G protein-coupled receptor 139                                                                       | 2.04E-01 | N        |          |          |
| <i>Nkiras1</i>    | -1.31 | 2.49E-03 | 2.31E-02 | 46.1         | 35.2         | 1          | 1              |      |          |       |     | 1.16  | NFKB inhibitor interacting Ras-like 1                                                                | 7.63E-01 | N        |          | Y        |
| <i>Nr1d1</i>      | 1.32  | 2.50E-03 | 2.32E-02 | 30.1         | 39.7         | 1          |                |      |          |       |     | 1.83  | nuclear receptor subfamily 1, group D, member 1                                                      | 4.13E-12 | Y        |          |          |
| <i>Grm7</i>       | -1.32 | 2.51E-03 | 2.32E-02 | 4.4          | 3.3          | 1          | 1              | 2    |          |       |     | 1.37  | glutamate receptor, metabotropic 7                                                                   | 1.21E-01 | N        |          | N        |
| <i>Polr2i</i>     | 1.71  | 2.52E-03 | 2.33E-02 | 3.3          | 5.7          |            | 1              |      |          |       |     | 1.65  | polymerase (RNA) II (DNA directed) polypeptide I, 14.5kDa                                            | 1.64E-02 | Y        |          |          |
| <i>Ruvb12</i>     | 1.34  | 2.53E-03 | 2.34E-02 | 23.3         | 31.2         |            |                |      | 1        |       |     |       | RuvB-like 2 (E. coli)                                                                                | 6.95E-02 | N        |          |          |
| <i>Mapk9</i>      | -1.30 | 2.54E-03 | 2.34E-02 | 76.3         | 58.7         |            |                |      |          |       |     | -1.22 | mitogen-activated protein kinase 9                                                                   | 2.78E-02 | Y        |          |          |
| <i>Selo</i>       | 1.32  | 2.54E-03 | 2.34E-02 | 27.1         | 35.7         |            |                |      |          |       |     | 1.48  | selenoprotein O                                                                                      | 1.01E-05 | Y        |          |          |
| <i>Itfg1</i>      | -1.30 | 2.58E-03 | 2.38E-02 | 139.6        | 107.7        |            |                |      |          |       |     | -1.23 | integrin alpha FG-GAP repeat containing 1                                                            | 1.96E-02 | Y        |          |          |
| <i>Tm4sf19</i>    | -1.97 | 2.58E-03 | 2.38E-02 | 3.4          | 1.7          |            |                |      |          |       |     | -2.02 | transmembrane 4 L six family member 19                                                               | 2.55E-04 | Y        |          |          |
| <i>Cdgap</i>      | 1.32  | 2.59E-03 | 2.38E-02 | 11.6         | 15.4         |            | 1              |      |          |       |     | 1.47  | Cdc42 GTPase-activating protein                                                                      | 2.24E-05 | Y        |          |          |
| <i>Fdft1</i>      | -1.30 | 2.60E-03 | 2.40E-02 | 66.8         | 51.3         |            | 1              |      |          |       |     | -1.47 | farnesyl-diphosphate farnesyltransferase 1                                                           | 1.54E-06 | Y        |          |          |
| <i>Col1a1</i>     | 1.34  | 2.62E-03 | 2.41E-02 | 6.3          | 8.4          | 1          |                |      |          |       |     | 2.09  | collagen, type I, alpha 1                                                                            | 2.65E-16 | Y        |          |          |
| <i>Ppm1d</i>      | 1.32  | 2.63E-03 | 2.41E-02 | 19.0         | 25.1         |            |                |      |          |       |     | 1.82  | protein phosphatase, Mg2+/Mn2+ dependent, 1D                                                         | 1.65E-11 | Y        |          |          |
| <i>Jakmip1</i>    | -1.33 | 2.65E-03 | 2.43E-02 | 28.0         | 21.1         |            | 1              | 1    |          |       |     | -1.53 | janus kinase and microtubule interacting protein 1                                                   | 3.55E-07 | Y        |          |          |
| <i>Tspo</i>       | 1.59  | 2.66E-03 | 2.44E-02 | 4.8          | 7.7          |            |                |      |          |       |     | 1.76  | translocator protein (18kDa)                                                                         | 3.16E-04 | Y        |          |          |
| <i>Ptger4</i>     | 1.73  | 2.66E-03 | 2.44E-02 | 1.6          | 2.8          |            |                |      | 1        |       |     |       | prostaglandin E receptor 4 (subtype EP4)                                                             | 1.73E-01 | N        |          |          |
| <i>Ankrd54</i>    | 1.36  | 2.66E-03 | 2.44E-02 | 13.4         | 18.1         |            |                |      |          |       |     | 1.26  | ankyrin repeat domain 54                                                                             | 3.62E-02 | Y        |          |          |
| <i>Slc26a1</i>    | -1.69 | 2.67E-03 | 2.45E-02 | 1.4          | 0.8          |            |                |      |          |       |     |       | solute carrier family 26 (sulfate transporter), member 1                                             | 3.75E-01 | N        |          |          |
| <i>Tcfe2a</i>     | 1.39  | 2.68E-03 | 2.45E-02 | 5.4          | 7.6          |            |                |      |          |       |     | 1.40  |                                                                                                      | 3.90E-03 | Y        |          |          |
| <i>Orai3</i>      | 1.37  | 2.68E-03 | 2.45E-02 | 11.9         | 16.2         |            | 1              |      |          |       |     | 1.63  | ORAI calcium release-activated calcium modulator 3                                                   | 8.18E-07 | Y        |          |          |
| <i>Itpr1p1</i>    | 1.97  | 2.69E-03 | 2.46E-02 | 0.7          | 1.4          |            |                |      |          |       |     |       | inositol 1,4,5-trisphosphate receptor interacting protein-like                                       | 4.16E-01 | N        |          |          |
| <i>Gpc5</i>       | -1.33 | 2.70E-03 | 2.46E-02 | 21.4         | 16.1         |            |                | 1    |          |       |     | -1.36 | glypican 5                                                                                           | 6.12E-04 | Y        |          |          |

Supplementary Table 1

| gene             | FC    | Pvalue   | FDR      | control RPKM | alcohol RPKM | P drinking | P vs. NP naïve | GWAS | GE in PM | AcbSh | CeA | DRN   | gene title                                                                                                                  | DRN FDR  | same dir | PAG+ ACB | PAG+ CeA |
|------------------|-------|----------|----------|--------------|--------------|------------|----------------|------|----------|-------|-----|-------|-----------------------------------------------------------------------------------------------------------------------------|----------|----------|----------|----------|
| <i>Crhr1</i>     | 1.36  | 2.70E-03 | 2.46E-02 | 19.2         | 26.1         |            | 1              |      | 1        |       |     | 3.00  | corticotropin releasing hormone receptor 1                                                                                  | 1.94E-23 | Y        |          |          |
| <i>Tmem150c</i>  | -1.32 | 2.72E-03 | 2.47E-02 | 24.6         | 18.6         |            |                |      |          |       |     | -1.60 |                                                                                                                             | 1.10E-08 | Y        |          |          |
| <i>LOC679651</i> | -1.29 | 2.72E-03 | 2.48E-02 | 38.6         | 29.8         |            |                |      |          |       |     | -1.39 |                                                                                                                             | 4.50E-05 | Y        |          |          |
| <i>Kremen1</i>   | 1.48  | 2.73E-03 | 2.48E-02 | 3.7          | 5.5          |            |                |      |          |       |     | 1.53  | kringle containing transmembrane protein 1                                                                                  | 1.87E-03 | Y        |          |          |
| <i>Tob2</i>      | 1.35  | 2.75E-03 | 2.50E-02 | 13.0         | 17.5         |            |                |      |          |       |     | 1.79  | transducer of ERBB2, 2                                                                                                      | 2.61E-09 | Y        |          |          |
| <i>Vcan</i>      | 1.30  | 2.77E-03 | 2.51E-02 | 12.7         | 16.5         |            | 2              |      |          |       |     | 1.50  | versican                                                                                                                    | 7.96E-07 | Y        |          |          |
| <i>H6pd</i>      | 1.32  | 2.77E-03 | 2.51E-02 | 11.4         | 15.1         |            |                |      |          |       |     | 1.71  | hexose-6-phosphate dehydrogenase (glucose 1-dehydrogenase)                                                                  | 3.57E-09 | Y        |          |          |
| <i>Nrg1</i>      | -1.38 | 2.80E-03 | 2.54E-02 | 4.0          | 2.9          | 1          | 1              | 1    |          | -1.24 |     | -1.26 | neuregulin 1                                                                                                                | 2.47E-02 | Y        | Y        |          |
| <i>Hcrtr2</i>    | -1.53 | 2.80E-03 | 2.54E-02 | 2.8          | 1.8          |            | 1              |      |          |       |     | -2.09 | hypocretin (orexin) receptor 2                                                                                              | 7.42E-16 | Y        |          |          |
| <i>Car14</i>     | -1.43 | 2.81E-03 | 2.54E-02 | 14.5         | 10.2         |            | 1              |      |          |       |     |       | carbonic anhydrase 14                                                                                                       | 1.63E-01 | N        |          |          |
| <i>Kcnj2</i>     | -1.52 | 2.81E-03 | 2.54E-02 | 6.4          | 4.2          |            |                |      | 1        |       |     |       | potassium inwardly-rectifying channel, subfamily J, member 2                                                                | 1.37E-01 | N        |          |          |
| <i>Tmem116</i>   | 2.24  | 2.82E-03 | 2.55E-02 | 0.6          | 1.4          |            |                |      |          |       |     |       | transmembrane protein 116                                                                                                   | 6.78E-02 | N        |          |          |
| <i>Pkp3</i>      | 1.84  | 2.83E-03 | 2.55E-02 | 0.6          | 1.1          |            |                |      |          |       |     | 3.89  | plakophilin 3                                                                                                               | 8.90E-09 | Y        |          |          |
| <i>Pnkp</i>      | 1.37  | 2.83E-03 | 2.56E-02 | 11.2         | 15.4         | 1          |                |      |          |       |     |       | polynucleotide kinase 3'-phosphatase                                                                                        | 2.91E-01 | N        |          |          |
| <i>Npepl1</i>    | 1.44  | 2.85E-03 | 2.57E-02 | 5.2          | 7.4          |            |                |      | 2        |       |     | 1.30  | aminopeptidase-like 1                                                                                                       | 3.84E-02 | Y        |          |          |
| <i>Map3k12</i>   | 1.30  | 2.85E-03 | 2.57E-02 | 67.7         | 87.7         |            |                |      |          |       |     | 1.28  | mitogen-activated protein kinase kinase kinase 12                                                                           | 4.87E-03 | Y        |          |          |
| <i>Alkbh4</i>    | 1.44  | 2.85E-03 | 2.57E-02 | 5.1          | 7.4          |            |                |      |          |       |     |       | alkB, alkylation repair homolog 4 (E. coli)                                                                                 | 1.20E-01 | N        |          |          |
| <i>Mir384</i>    | -1.40 | 2.87E-03 | 2.58E-02 | 222.7        | 158.7        |            |                |      |          |       |     |       |                                                                                                                             | 3.82E-01 | N        |          |          |
| <i>Pdk4</i>      | -1.40 | 2.87E-03 | 2.58E-02 | 14.0         | 10.0         |            |                |      | 2        |       |     |       | pyruvate dehydrogenase kinase, isozyme 4                                                                                    | 1.42E-01 | N        |          |          |
| <i>Reep5</i>     | -1.29 | 2.87E-03 | 2.58E-02 | 200.5        | 155.3        |            | 1              |      |          |       |     | -1.40 | receptor accessory protein 5                                                                                                | 2.22E-05 | Y        |          |          |
| <i>Spag4</i>     | -1.53 | 2.87E-03 | 2.58E-02 | 5.4          | 3.5          |            | 2              |      |          |       |     |       | sperm associated antigen 4                                                                                                  | 6.90E-02 | N        |          |          |
| <i>Map1b</i>     | -1.29 | 2.89E-03 | 2.59E-02 | 381.6        | 296.6        | 2          | 1              |      | 1        |       |     | -1.28 | microtubule-associated protein 1B                                                                                           | 2.47E-03 | Y        |          |          |
| <i>Klhl4</i>     | -1.38 | 2.90E-03 | 2.60E-02 | 7.1          | 5.2          |            |                |      | 1        |       |     |       | kelch-like 4 (Drosophila)                                                                                                   | 7.33E-02 | N        |          |          |
| <i>Rab5a</i>     | -1.36 | 2.90E-03 | 2.60E-02 | 44.7         | 32.9         |            | 1              |      |          |       |     | -1.24 | RAB5A, member RAS oncogene family                                                                                           | 4.51E-02 | Y        |          |          |
| <i>Lrn4</i>      | 1.36  | 2.91E-03 | 2.60E-02 | 9.7          | 13.2         |            |                |      |          |       |     | 1.32  | leucine rich repeat and fibronectin type III domain containing 4 / nicotinate phosphoribosyltransferase domain containing 1 | 9.00E-03 | Y        |          |          |
| <i>Naprt1</i>    | 1.41  | 2.93E-03 | 2.62E-02 | 6.9          | 9.7          |            |                |      |          |       |     | 1.34  | serpin peptidase inhibitor, clade E (nexin, plasminogen activat                                                             | 1.75E-02 | Y        |          |          |
| <i>Serpine2</i>  | -1.30 | 2.94E-03 | 2.63E-02 | 107.4        | 82.8         |            |                |      |          |       |     |       | unc-13 homolog C (C. elegans)                                                                                               | 2.10E-01 | N        |          |          |
| <i>Unc13c</i>    | 1.29  | 2.94E-03 | 2.63E-02 | 47.8         | 61.8         | 1          |                | 1    |          |       |     | 2.33  | major histocompatibility complex, class I-related                                                                           | 2.09E-27 | Y        |          |          |
| <i>Mr1</i>       | 1.39  | 2.94E-03 | 2.63E-02 | 10.7         | 14.8         |            |                |      |          |       |     | 1.99  |                                                                                                                             | 6.10E-11 | Y        |          |          |
| <i>Nus1</i>      | -1.31 | 2.96E-03 | 2.64E-02 | 32.0         | 24.5         |            | 2              |      |          |       |     | -1.30 |                                                                                                                             | 2.57E-03 | Y        |          |          |
| <i>Efcab10</i>   | 1.82  | 2.96E-03 | 2.64E-02 | 2.2          | 3.9          |            |                |      |          |       |     | 1.94  | EF-hand calcium binding domain 10                                                                                           | 3.32E-04 | Y        |          |          |
| <i>Zcchc8</i>    | 1.33  | 2.96E-03 | 2.64E-02 | 14.9         | 19.8         |            |                |      |          |       |     |       | zinc finger, CCHC domain containing 8                                                                                       | 1.38E-01 | N        |          |          |
| <i>Pacsin3</i>   | 1.32  | 2.98E-03 | 2.65E-02 | 30.7         | 40.5         |            |                |      |          |       |     | 1.54  | protein kinase C and casein kinase substrate in neurons 3                                                                   | 2.60E-06 | Y        |          |          |
| <i>Camk2d</i>    | 1.29  | 2.99E-03 | 2.66E-02 | 107.6        | 139.2        | 1          | 1              | 1    |          |       |     |       | calcium/calmodulin-dependent protein kinase II delta                                                                        | 8.00E-02 | N        |          |          |
| <i>Chkb</i>      | 1.33  | 3.00E-03 | 2.67E-02 | 26.7         | 35.4         |            | 1              |      |          |       |     | 1.36  | choline kinase beta                                                                                                         | 1.09E-03 | Y        |          |          |
| <i>Cdh11</i>     | -1.32 | 3.02E-03 | 2.68E-02 | 14.8         | 11.2         | 2          |                |      |          |       |     | -1.30 | cadherin 11, type 2, OB-cadherin (osteoblast)                                                                               | 3.30E-03 | Y        |          |          |
| <i>Afap11</i>    | -1.54 | 3.04E-03 | 2.70E-02 | 2.2          | 1.4          |            |                |      |          |       |     |       | actin filament associated protein 1-like 1                                                                                  | 8.26E-01 | N        |          |          |

Supplementary Table 1

| gene              | FC    | Pvalue   | FDR      | control RPKM | alcohol RPKM | P drinking | P vs. NP naïve | GWAS | GE in PM | AcbSh | CeA | DRN   | gene title                                                                                                     | DRN FDR  | same dir | PAG+ ACB | PAG+ CeA |
|-------------------|-------|----------|----------|--------------|--------------|------------|----------------|------|----------|-------|-----|-------|----------------------------------------------------------------------------------------------------------------|----------|----------|----------|----------|
| <i>LOC499240</i>  | 1.55  | 3.08E-03 | 2.73E-02 | 3.7          | 5.8          |            |                |      |          |       |     | 2.00  |                                                                                                                | 2.26E-06 | Y        |          |          |
| <i>Hpse</i>       | -2.15 | 3.08E-03 | 2.73E-02 | 0.9          | 0.4          |            |                |      |          |       |     |       | heparanase                                                                                                     | 8.76E-02 | N        |          |          |
| <i>Efhc1</i>      | 1.38  | 3.09E-03 | 2.74E-02 | 7.9          | 10.9         |            |                |      |          |       |     | 1.51  | EF-hand domain (C-terminal) containing 1                                                                       | 4.38E-05 | Y        |          |          |
| <i>Il11</i>       | 1.84  | 3.09E-03 | 2.74E-02 | 1.4          | 2.6          |            |                |      |          |       |     | 1.66  | interleukin 11                                                                                                 | 3.66E-02 | Y        |          |          |
| <i>RGD1307461</i> | 1.36  | 3.09E-03 | 2.74E-02 | 8.4          | 11.4         |            |                |      |          |       |     | 1.57  |                                                                                                                | 2.71E-05 | Y        |          |          |
| <i>Mfsd6</i>      | -1.29 | 3.11E-03 | 2.74E-02 | 62.5         | 48.4         |            | 1              |      |          |       |     | -1.35 | major facilitator superfamily domain containing 6                                                              | 2.82E-04 | Y        |          |          |
| <i>Mir495</i>     | -2.50 | 3.11E-03 | 2.74E-02 | 17.5         | 7.0          |            |                |      |          |       |     |       | microRNA 495                                                                                                   | 5.44E-01 | N        |          |          |
| <i>Adcy10</i>     | -1.63 | 3.12E-03 | 2.75E-02 | 1.0          | 0.6          |            |                |      |          |       |     |       | adenylate cyclase 10 (soluble)                                                                                 | 1.53E-01 | N        |          |          |
| <i>Tmed3</i>      | -1.37 | 3.12E-03 | 2.75E-02 | 20.1         | 14.7         | 1          | 1              |      |          |       |     | -1.34 | transmembrane emp24 protein transport domain containing 3                                                      | 3.01E-03 | Y        |          |          |
| <i>Traf2</i>      | 1.35  | 3.13E-03 | 2.75E-02 | 12.7         | 17.2         |            |                |      |          |       |     |       | TNF receptor-associated factor 2                                                                               | 7.36E-02 | N        |          |          |
| <i>Ube2v2</i>     | -1.31 | 3.15E-03 | 2.77E-02 | 29.0         | 22.1         |            |                |      | 2        |       |     | -1.37 | ubiquitin-conjugating enzyme E2 variant 2                                                                      | 2.19E-04 | Y        |          |          |
| <i>Atp2a2</i>     | 1.29  | 3.16E-03 | 2.77E-02 | 303.6        | 390.3        |            | 3              |      | 1        |       |     | 1.37  | ATPase, Ca <sup>++</sup> transporting, cardiac muscle, slow twitch 2                                           | 8.82E-05 | Y        |          |          |
| <i>Samd4a</i>     | -1.31 | 3.16E-03 | 2.77E-02 | 28.7         | 21.9         |            | 1              | 1    |          |       |     | -1.29 | sterile alpha motif domain containing 4A                                                                       | 3.76E-03 | Y        |          |          |
| <i>Htr3a</i>      | -1.61 | 3.16E-03 | 2.77E-02 | 2.8          | 1.7          |            | 1              |      |          |       |     | -1.58 | 5-hydroxytryptamine (serotonin) receptor 3A, ionotropic                                                        | 2.81E-03 | Y        |          |          |
| <i>Casq1</i>      | 1.71  | 3.17E-03 | 2.78E-02 | 1.3          | 2.3          |            |                |      |          |       |     |       | calsequestrin 1 (fast-twitch, skeletal muscle)                                                                 | 8.14E-02 | N        |          |          |
| <i>Epha10</i>     | -1.35 | 3.18E-03 | 2.79E-02 | 13.0         | 9.7          |            |                |      |          |       |     | -1.47 | EPH receptor A10                                                                                               | 2.82E-05 | Y        |          |          |
| <i>Impad1</i>     | -1.29 | 3.18E-03 | 2.79E-02 | 78.1         | 60.7         |            |                |      |          |       |     | -1.23 | inositol monophosphatase domain containing 1                                                                   | 1.52E-02 | Y        |          |          |
| <i>Fam21c</i>     | 1.29  | 3.21E-03 | 2.81E-02 | 81.7         | 105.3        |            | 1              |      |          |       |     | 1.35  | family with sequence similarity 21, member C                                                                   | 2.35E-04 | Y        |          |          |
| <i>Tanc1</i>      | 1.30  | 3.21E-03 | 2.81E-02 | 21.8         | 28.3         |            |                |      |          |       |     | 1.69  | tetratricopeptide repeat, ankyrin repeat and coiled-coil containin                                             | 2.28E-10 | Y        |          |          |
| <i>Caps2</i>      | 1.61  | 3.22E-03 | 2.82E-02 | 1.8          | 2.9          |            |                |      |          |       |     | 1.82  | calcyphosine 2                                                                                                 | 4.23E-05 | Y        |          |          |
| <i>Acsm5</i>      | -2.01 | 3.23E-03 | 2.83E-02 | 1.0          | 0.5          |            |                |      |          |       |     | 1.96  | acyl-CoA synthetase medium-chain family member 5                                                               | 3.47E-02 | N        |          |          |
| <i>Corin</i>      | -3.06 | 3.24E-03 | 2.83E-02 | 0.3          | 0.1          |            |                |      |          |       |     |       | corin, serine peptidase                                                                                        | 0.00E+00 | N        |          |          |
| <i>Neu4</i>       | -1.42 | 3.30E-03 | 2.87E-02 | 6.1          | 4.3          |            |                |      |          |       |     | -1.31 | sialidase 4                                                                                                    | 2.85E-02 | Y        |          |          |
| <i>Htr1a</i>      | -1.48 | 3.30E-03 | 2.87E-02 | 7.9          | 5.3          |            |                |      |          | 1     |     | -1.60 | 5-hydroxytryptamine (serotonin) receptor 1A, G protein-coupled                                                 | 1.48E-07 | Y        |          |          |
| <i>Nutf2</i>      | -1.33 | 3.30E-03 | 2.88E-02 | 26.3         | 19.8         |            |                |      |          |       |     | -1.26 | nuclear transport factor 2                                                                                     | 1.66E-02 | Y        |          |          |
| <i>Ttc29</i>      | 1.44  | 3.31E-03 | 2.88E-02 | 5.0          | 7.3          |            |                |      |          |       |     | 2.09  | tetratricopeptide repeat domain 29                                                                             | 2.26E-11 | Y        |          |          |
| <i>Evx1</i>       | -2.05 | 3.34E-03 | 2.91E-02 | 0.9          | 0.5          |            |                |      |          |       |     |       | even-skipped homeobox 1                                                                                        | 0.00E+00 | N        |          |          |
| <i>Herv-frd</i>   | -1.61 | 3.35E-03 | 2.91E-02 | 3.0          | 1.9          |            |                |      |          |       |     |       |                                                                                                                | 2.64E-01 | N        |          |          |
| <i>Cyp2j10</i>    | -1.46 | 3.35E-03 | 2.91E-02 | 5.8          | 3.9          |            | 1              |      |          |       |     | -1.76 | cytochrome P450, family 2, subfamily j, polypeptide 13; cytochrome P450, family 2, subfamily j, polypeptide 10 | 3.42E-06 | Y        |          |          |
| <i>Nfatc2</i>     | -1.37 | 3.36E-03 | 2.91E-02 | 6.6          | 4.8          |            |                |      |          |       |     | -1.33 | nuclear factor of activated T-cells, cytoplasmic, calcineurin-dep                                              | 9.08E-03 | Y        |          |          |
| <i>Nedd4l</i>     | 1.29  | 3.36E-03 | 2.91E-02 | 51.0         | 65.8         |            | 1              | 1    | 1        |       |     | 1.63  | neural precursor cell expressed, developmentally down-regulated 4                                              | 1.48E-09 | Y        |          |          |
| <i>Gabre</i>      | -1.79 | 3.36E-03 | 2.91E-02 | 1.2          | 0.6          |            |                |      |          |       |     | -2.27 | gamma-aminobutyric acid (GABA) A receptor, epsilon                                                             | 2.82E-15 | Y        |          |          |

Supplementary Table 1

| gene                | FC    | Pvalue   | FDR      | control RPKM | alcohol RPKM | P drinking | P vs. NP naïve | GWAS | GE in PM | AcbSh | CeA | DRN   | gene title                                                                                                      | DRN FDR  | same dir | PAG+ ACB | PAG+ CeA |
|---------------------|-------|----------|----------|--------------|--------------|------------|----------------|------|----------|-------|-----|-------|-----------------------------------------------------------------------------------------------------------------|----------|----------|----------|----------|
| <i>Hcn1</i>         | 1.31  | 3.37E-03 | 2.92E-02 | 26.3         | 34.4         | 2          |                |      |          |       |     | 1.72  | hyperpolarization activated cyclic nucleotide-gated potassium chann                                             | 1.20E-10 | Y        |          |          |
| <i>Lypd1</i>        | -1.33 | 3.38E-03 | 2.93E-02 | 23.7         | 17.8         |            |                |      |          |       |     | -1.76 | LY6/PLAUR domain containing 1                                                                                   | 2.05E-12 | Y        |          |          |
| <i>Ifitm2</i>       | 1.57  | 3.40E-03 | 2.94E-02 | 6.4          | 10.1         |            |                |      | 2        |       |     | 2.00  | interferon induced transmembrane protein 2                                                                      | 2.95E-06 | Y        |          |          |
| <i>Stk32a</i>       | 1.37  | 3.40E-03 | 2.94E-02 | 11.7         | 16.1         |            |                | 1    |          |       |     | 1.46  | serine/threonine kinase 32A                                                                                     | 2.62E-04 | Y        |          |          |
| <i>Ptafr</i>        | -1.45 | 3.42E-03 | 2.95E-02 | 3.7          | 2.5          |            |                |      |          |       |     |       | platelet-activating factor receptor                                                                             | 7.00E-01 | N        |          |          |
| <i>Pcdhb6</i>       | -1.54 | 3.44E-03 | 2.97E-02 | 2.2          | 1.4          |            |                |      |          |       |     |       | protocadherin beta 6                                                                                            | 4.26E-01 | N        |          |          |
| <i>Znf483</i>       | -1.29 | 3.44E-03 | 2.97E-02 | 68.8         | 53.2         |            |                |      |          |       |     | -1.40 | zinc finger protein 483                                                                                         | 4.41E-05 | Y        |          |          |
| <i>Slc28a3</i>      | 1.74  | 3.47E-03 | 2.99E-02 | 1.1          | 1.8          |            |                |      |          |       |     | 1.64  | solute carrier family 28 (sodium-coupled nucleoside transporter)                                                | 3.35E-02 | Y        |          |          |
| <i>Mir764</i>       | -2.02 | 3.47E-03 | 2.99E-02 | 20.7         | 10.2         |            |                |      |          |       |     |       | miRNA 764                                                                                                       | 2.05E-01 | N        |          |          |
| <i>Ube2d2</i>       | -1.31 | 3.49E-03 | 3.00E-02 | 119.1        | 91.1         | 3          |                |      |          |       |     | -1.23 | ubiquitin-conjugating enzyme E2D 2                                                                              | 2.60E-02 | Y        |          |          |
| <i>Slc6a5</i>       | -1.33 | 3.49E-03 | 3.00E-02 | 7.5          | 5.7          |            |                | 1    |          |       |     |       | solute carrier family 6 (neurotransmitter transporter, glycine), WW domain containing transcription regulator 1 | 7.69E-01 | N        |          |          |
| <i>Wwtr1</i>        | 1.41  | 3.50E-03 | 3.01E-02 | 7.3          | 10.3         |            |                | 1    | 1        |       |     | 1.35  | regulator 1                                                                                                     | 1.47E-02 | Y        |          |          |
| <i>Lqi4</i>         | 1.30  | 3.51E-03 | 3.01E-02 | 50.0         | 64.7         |            |                |      |          |       |     | 1.64  | leucine-rich repeat LGI family, member 4                                                                        | 1.46E-09 | Y        |          |          |
| <i>Idua</i>         | 1.30  | 3.51E-03 | 3.01E-02 | 34.9         | 45.4         |            | 1              |      |          |       |     |       | iduronidase, alpha-L-                                                                                           | 8.79E-01 | N        |          |          |
| <i>Plexnb3</i>      | -1.30 | 3.51E-03 | 3.01E-02 | 23.2         | 17.9         |            |                |      |          |       |     |       | plexin B3                                                                                                       | 4.17E-01 | N        |          |          |
| <i>Uhmk1</i>        | -1.31 | 3.51E-03 | 3.01E-02 | 25.3         | 19.4         | 1          |                |      |          |       |     | -1.46 | U2AF homology motif (UHM) kinase 1                                                                              | 5.06E-06 | Y        |          |          |
| <i>RGD1306739</i>   | 1.35  | 3.53E-03 | 3.02E-02 | 20.6         | 27.8         |            |                |      |          |       |     | 1.65  |                                                                                                                 | 8.81E-08 | Y        |          |          |
| <i>Ophn1</i>        | 1.45  | 3.53E-03 | 3.02E-02 | 14.3         | 20.8         |            | 1              |      |          |       |     | 1.37  | oligophrenin 1                                                                                                  | 1.33E-02 | Y        |          |          |
| <i>Calhm2</i>       | 1.50  | 3.53E-03 | 3.02E-02 | 3.1          | 4.6          |            |                |      |          |       |     | 3.06  | calcium homeostasis modulator 2                                                                                 | 1.16E-11 | Y        |          |          |
| <i>Syncrip</i>      | -1.41 | 3.55E-03 | 3.03E-02 | 9.7          | 6.9          | 1          |                |      |          |       |     | 1.41  | synaptotagmin binding, cytoplasmic RNA interacting protein                                                      | 7.16E-03 | N        |          |          |
| <i>Tubb3</i>        | -1.28 | 3.56E-03 | 3.04E-02 | 284.3        | 221.4        |            | 1              |      |          |       |     | -1.41 | tubulin, beta 3 class III                                                                                       | 1.52E-05 | Y        |          |          |
| <i>Pcif1</i>        | 1.31  | 3.56E-03 | 3.04E-02 | 14.2         | 18.6         |            |                |      |          |       |     | 1.59  | PDX1 C-terminal inhibiting factor 1                                                                             | 1.95E-07 | Y        |          |          |
| <i>Ncan</i>         | -1.29 | 3.57E-03 | 3.05E-02 | 41.0         | 31.8         |            |                |      |          |       |     | -1.21 | neurocan                                                                                                        | 3.98E-02 | Y        |          |          |
| <i>RGD1562136</i>   | -1.33 | 3.58E-03 | 3.05E-02 | 16.0         | 12.0         |            |                |      |          |       |     |       |                                                                                                                 | 1.22E-01 | N        |          |          |
| <i>LOC100125384</i> | 1.39  | 3.59E-03 | 3.05E-02 | 9.0          | 12.5         |            |                |      |          |       |     |       |                                                                                                                 | 5.19E-02 | N        |          |          |
| <i>Tomm34</i>       | -1.30 | 3.59E-03 | 3.06E-02 | 52.1         | 40.0         |            |                |      |          |       |     | -1.23 | translocase of outer mitochondrial membrane 34                                                                  | 2.86E-02 | Y        |          |          |
| <i>Adpgk</i>        | -1.31 | 3.62E-03 | 3.07E-02 | 27.2         | 20.7         |            | 1              |      |          |       |     | -1.31 | ADP-dependent glucokinase                                                                                       | 2.76E-03 | Y        |          |          |
| <i>LOC501194</i>    | -1.34 | 3.62E-03 | 3.07E-02 | 25.5         | 19.0         |            |                |      |          |       |     |       |                                                                                                                 | 1.56E-01 | N        |          |          |
| <i>Trim65</i>       | 1.36  | 3.62E-03 | 3.07E-02 | 9.8          | 13.3         |            |                |      |          |       |     | 1.26  | tripartite motif containing 65                                                                                  | 4.04E-02 | Y        |          |          |
| <i>RGD1564257</i>   | -1.59 | 3.63E-03 | 3.08E-02 | 13.0         | 8.2          |            |                |      |          |       |     |       |                                                                                                                 | 5.99E-01 | N        |          |          |
| <i>Foxb1</i>        | -1.91 | 3.65E-03 | 3.10E-02 | 1.6          | 0.8          |            |                |      |          |       |     |       | forkhead box B1                                                                                                 | 4.97E-01 | N        |          |          |
| <i>Rwdd2a</i>       | -1.60 | 3.68E-03 | 3.12E-02 | 3.6          | 2.3          |            | 1              |      |          |       |     |       | RWD domain containing 2A                                                                                        | 1.43E-01 | N        |          |          |
| <i>Stxbp6</i>       | -1.38 | 3.68E-03 | 3.12E-02 | 16.9         | 12.3         |            |                | 1    |          |       |     | -1.32 | syntaxin binding protein 6 (amisyn)                                                                             | 1.10E-02 | Y        |          |          |
| <i>Slc25a22</i>     | 1.29  | 3.69E-03 | 3.12E-02 | 87.6         | 112.9        | 1          |                | 1    | 2        |       |     | 1.30  | solute carrier family 25 (mitochondrial carrier: glutamate), me                                                 | 2.25E-03 | Y        |          |          |
| <i>Golim4</i>       | -1.33 | 3.69E-03 | 3.12E-02 | 13.3         | 10.0         |            |                |      | 1        |       |     |       | golgi integral membrane protein 4                                                                               | 5.33E-01 | N        |          |          |
| <i>RGD1305733</i>   | -1.29 | 3.70E-03 | 3.12E-02 | 111.9        | 86.7         |            |                |      |          |       |     | -1.55 |                                                                                                                 | 2.91E-08 | Y        |          |          |
| <i>Sec14l1</i>      | 1.29  | 3.70E-03 | 3.13E-02 | 42.5         | 54.9         |            | 1              |      | 1        |       |     | 1.52  | SEC14-like 1 ( <i>S. cerevisiae</i> )                                                                           | 3.92E-07 | Y        |          |          |
| <i>Znf474</i>       | 1.51  | 3.70E-03 | 3.13E-02 | 2.5          | 3.7          |            |                |      |          |       |     | 1.98  | zinc finger protein 474                                                                                         | 4.45E-08 | Y        |          |          |
| <i>Arse</i>         | 1.47  | 3.71E-03 | 3.13E-02 | 3.7          | 5.5          |            | 1              |      |          |       |     | 1.45  | arylsulfatase E (chondrodysplasia punctata 1)                                                                   | 7.23E-03 | Y        |          |          |
| <i>Sqle</i>         | -1.30 | 3.72E-03 | 3.13E-02 | 59.0         | 45.5         | 1          |                |      | 1        |       |     | -1.47 | squalene epoxidase                                                                                              | 3.08E-06 | Y        |          |          |
| <i>Ar</i>           | -1.38 | 3.72E-03 | 3.13E-02 | 5.3          | 3.8          |            | 2              |      |          |       |     | -1.64 | androgen receptor                                                                                               | 5.29E-06 | Y        |          |          |

Supplementary Table 1

| gene              | FC    | Pvalue   | FDR      | control RPKM | alcohol RPKM | P drinking | P vs. NP naïve | GWAS | GE in PM | AcbSh | CeA | DRN   | gene title                                                                                                           | DRN FDR  | same dir | PAG+ ACB | PAG+ CeA |
|-------------------|-------|----------|----------|--------------|--------------|------------|----------------|------|----------|-------|-----|-------|----------------------------------------------------------------------------------------------------------------------|----------|----------|----------|----------|
| <i>Lrrc34</i>     | 1.35  | 3.73E-03 | 3.13E-02 | 11.9         | 16.0         |            |                |      |          |       |     | 2.10  | leucine rich repeat containing 34                                                                                    | 3.66E-16 | Y        |          |          |
| <i>Iqub</i>       | 1.35  | 3.73E-03 | 3.13E-02 | 8.1          | 10.9         |            | 1              |      |          |       |     | 1.60  | IQ motif and ubiquitin domain containing                                                                             | 1.23E-06 | Y        |          |          |
| <i>RGD1311358</i> | 1.48  | 3.73E-03 | 3.13E-02 | 4.5          | 6.7          |            |                |      |          |       |     | 1.37  |                                                                                                                      | 2.94E-02 | Y        |          |          |
| <i>Ret</i>        | 1.30  | 3.74E-03 | 3.14E-02 | 15.2         | 19.7         |            | 1              |      |          |       |     |       | ret proto-oncogene                                                                                                   | 7.15E-02 | N        |          |          |
| <i>Clc1</i>       | 1.42  | 3.75E-03 | 3.15E-02 | 8.4          | 12.0         |            |                |      |          |       |     | 1.61  | chloride intracellular channel 1                                                                                     | 1.82E-05 | Y        |          |          |
| <i>Grik4</i>      | -1.33 | 3.76E-03 | 3.15E-02 | 13.6         | 10.2         |            |                |      |          |       |     |       | glutamate receptor, ionotropic, kainate 4                                                                            | 5.19E-02 | N        |          |          |
| <i>Neu2</i>       | -1.94 | 3.76E-03 | 3.15E-02 | 1.5          | 0.8          |            | 1              |      |          |       |     |       | sialidase 2 (cytosolic sialidase)                                                                                    | 5.20E-01 | N        |          |          |
| <i>Fads6</i>      | 1.31  | 3.76E-03 | 3.15E-02 | 28.5         | 37.4         |            |                | 1    |          |       |     | 1.49  | fatty acid desaturase domain family, member 6                                                                        | 1.03E-05 | Y        |          |          |
| <i>Synj2</i>      | -1.32 | 3.77E-03 | 3.15E-02 | 10.0         | 7.6          |            |                |      |          |       |     |       | synaptojanin 2                                                                                                       | 7.85E-01 | N        |          |          |
| <i>Kcnf1</i>      | -1.51 | 3.77E-03 | 3.16E-02 | 3.0          | 2.0          |            |                |      |          |       |     |       | potassium voltage-gated channel, subfamily F, member 1                                                               | 6.16E-01 | N        |          |          |
| <i>Gsk3b</i>      | -1.30 | 3.77E-03 | 3.16E-02 | 86.8         | 67.0         | 1          |                |      | 1        |       |     |       | glycogen synthase kinase 3 beta                                                                                      | 1.54E-01 | N        |          |          |
| <i>Grm8</i>       | -1.31 | 3.78E-03 | 3.16E-02 | 25.2         | 19.2         |            | 2              |      |          |       |     |       | glutamate receptor, metabotropic 8                                                                                   | 6.35E-01 | N        |          |          |
| <i>Ccdc85a</i>    | -1.34 | 3.78E-03 | 3.16E-02 | 20.2         | 15.0         |            |                |      |          |       |     | -1.55 | coiled-coil domain containing 85A                                                                                    | 6.45E-07 | Y        |          |          |
| <i>Rap1a</i>      | -1.30 | 3.79E-03 | 3.16E-02 | 35.1         | 26.9         |            | 1              |      |          |       |     |       | RAP1A, member of RAS oncogene family                                                                                 | 2.10E-01 | N        |          |          |
| <i>LOC500227</i>  | 1.44  | 3.79E-03 | 3.16E-02 | 4.5          | 6.5          |            |                |      |          |       |     | 1.62  |                                                                                                                      | 8.72E-05 | Y        |          |          |
| <i>Lgals3</i>     | 1.71  | 3.79E-03 | 3.16E-02 | 2.5          | 4.3          |            |                |      |          |       |     | 1.80  | lectin, galactoside-binding, soluble, 3                                                                              | 2.98E-04 | Y        |          |          |
| <i>Nog</i>        | 1.45  | 3.80E-03 | 3.16E-02 | 4.7          | 6.8          |            |                |      |          |       |     | 1.91  | noggin                                                                                                               | 3.87E-06 | Y        |          |          |
| <i>Hrasls</i>     | -1.40 | 3.80E-03 | 3.16E-02 | 5.6          | 4.0          |            | 3              |      | 1        |       |     | -1.36 | HRAS-like suppressor                                                                                                 | 9.63E-03 | Y        |          |          |
| <i>Gpr143</i>     | -1.56 | 3.82E-03 | 3.17E-02 | 3.9          | 2.5          |            |                |      |          |       |     |       | G protein-coupled receptor 143                                                                                       | 1.90E-01 | N        |          |          |
| <i>Slitrk2</i>    | -1.33 | 3.83E-03 | 3.18E-02 | 15.2         | 11.4         |            |                |      |          |       |     |       | SLIT and NTRK-like family, member 2                                                                                  | 6.61E-01 | N        |          |          |
| <i>Zgpat</i>      | 1.30  | 3.83E-03 | 3.18E-02 | 37.3         | 48.6         |            |                |      | 1        |       |     | 1.23  | zinc finger, CCCH-type with G patch domain                                                                           | 3.32E-02 | Y        |          |          |
| <i>Trhde</i>      | 1.30  | 3.87E-03 | 3.21E-02 | 9.9          | 12.9         |            |                |      |          |       |     | 1.35  | thyrotropin-releasing hormone degrading enzyme                                                                       | 9.53E-04 | Y        |          |          |
| <i>Raf1</i>       | 1.29  | 3.87E-03 | 3.21E-02 | 46.8         | 60.4         |            |                |      |          |       |     | 1.24  | v-raf-1 murine leukemia viral oncogene homolog 1                                                                     | 1.97E-02 | Y        |          |          |
| <i>Asgr2</i>      | -1.97 | 3.88E-03 | 3.22E-02 | 1.7          | 0.9          |            |                |      |          |       |     |       | asialoglycoprotein receptor 2                                                                                        | 7.81E-01 | N        |          |          |
| <i>Slc2a13</i>    | -1.32 | 3.91E-03 | 3.23E-02 | 8.8          | 6.7          |            | 1              |      |          |       |     | -1.57 | solute carrier family 2 (facilitated glucose transporter), membe                                                     | 1.26E-07 | Y        |          |          |
| <i>Per3</i>       | 1.29  | 3.92E-03 | 3.24E-02 | 32.3         | 41.8         |            | 1              |      |          |       |     | 1.44  | period homolog 3 (Drosophila)                                                                                        | 1.79E-05 | Y        |          |          |
| <i>Nxph3</i>      | 1.54  | 3.92E-03 | 3.24E-02 | 4.1          | 6.4          | 1          | 1              |      | 1        |       |     | -1.38 | neurexophilin 3                                                                                                      | 6.83E-03 | N        |          |          |
| <i>Kif21b</i>     | -1.30 | 3.93E-03 | 3.25E-02 | 16.4         | 12.6         |            |                |      |          |       |     |       | kinesin family member 21B                                                                                            | 6.92E-02 | N        |          |          |
| <i>Epor</i>       | 1.59  | 3.94E-03 | 3.25E-02 | 2.0          | 3.1          |            |                |      | 1        |       |     | 5.45  | erythropoietin receptor                                                                                              | 1.75E-10 | Y        |          |          |
| <i>Slc22a2</i>    | 1.99  | 3.97E-03 | 3.28E-02 | 0.5          | 1.1          |            |                |      |          |       |     | 2.08  | solute carrier family 22 (organic cation transporter), member 2                                                      | 2.10E-03 | Y        |          |          |
| <i>Stx4</i>       | 1.32  | 3.97E-03 | 3.28E-02 | 40.8         | 53.8         |            |                |      | 1        |       |     |       | syntaxin 4                                                                                                           | 6.50E-01 | N        |          |          |
| <i>Marcks1</i>    | -1.30 | 4.01E-03 | 3.30E-02 | 66.4         | 51.1         |            | 1              |      |          |       |     | -1.33 | MARCKS-like 1                                                                                                        | 1.26E-03 | Y        |          |          |
| <i>Shc2</i>       | -1.32 | 4.01E-03 | 3.30E-02 | 12.9         | 9.8          |            |                |      |          |       |     | -1.34 | SHC (Src homology 2 domain containing) transforming protein 2                                                        | 1.57E-03 | Y        |          |          |
| <i>Tic9b</i>      | 1.32  | 4.03E-03 | 3.32E-02 | 42.4         | 56.2         |            |                |      |          |       |     | 1.50  | tetratricopeptide repeat domain 9B                                                                                   | 2.61E-05 | Y        |          |          |
| <i>RGD1560608</i> | -1.47 | 4.03E-03 | 3.32E-02 | 13.8         | 9.4          |            |                |      |          |       |     |       |                                                                                                                      | 9.48E-02 | N        |          |          |
| <i>Ptgs2</i>      | 1.57  | 4.05E-03 | 3.32E-02 | 2.1          | 3.3          |            | 1              | 1    |          |       |     | 3.24  | prostaglandin-endoperoxide synthase 2 (prostaglandin G/H synthase regulator of G-protein signaling 7 binding protein | 3.85E-12 | Y        |          |          |
| <i>Rgs7bp</i>     | 1.31  | 4.05E-03 | 3.32E-02 | 34.9         | 45.8         |            | 2              |      |          |       |     | 1.61  | protein                                                                                                              | 1.02E-07 | Y        |          |          |
| <i>Spef2</i>      | 1.34  | 4.05E-03 | 3.33E-02 | 4.8          | 6.5          |            |                |      |          |       |     | 1.91  | sperm flagellar 2                                                                                                    | 1.01E-12 | Y        |          |          |

Supplementary Table 1

| gene              | FC    | Pvalue   | FDR      | control RPKM | alcohol RPKM | P drinking | P vs. NP naïve | GWAS | GE in PM | AcbSh | CeA | DRN   | gene title                                                         | DRN FDR  | same dir | PAG+ ACB | PAG+ CeA |
|-------------------|-------|----------|----------|--------------|--------------|------------|----------------|------|----------|-------|-----|-------|--------------------------------------------------------------------|----------|----------|----------|----------|
| <i>Dlgap4</i>     | 1.29  | 4.06E-03 | 3.33E-02 | 42.1         | 54.3         |            |                |      |          |       |     | 1.25  | discs, large (Drosophila) homolog-associated protein 4             | 1.11E-02 | Y        |          |          |
| <i>Nrp2</i>       | -1.31 | 4.08E-03 | 3.34E-02 | 17.2         | 13.1         |            |                | 1    |          |       |     |       | neuropilin 2                                                       | 1.08E-01 | N        |          |          |
| <i>Car12</i>      | -1.62 | 4.09E-03 | 3.35E-02 | 4.6          | 2.8          |            | 1              |      |          |       |     |       | carbonic anhydrase 12                                              | 6.68E-01 | N        |          |          |
| <i>Yaf2</i>       | -1.30 | 4.10E-03 | 3.35E-02 | 49.7         | 38.1         |            |                |      |          |       |     | -1.33 | YY1 associated factor 2                                            | 1.16E-03 | Y        |          |          |
| <i>Rps29</i>      | -1.31 | 4.11E-03 | 3.36E-02 | 231.0        | 176.8        | 1          |                |      | 1        |       |     |       | ribosomal protein S29                                              | 2.02E-01 | N        |          |          |
| <i>Pex6</i>       | 1.31  | 4.12E-03 | 3.37E-02 | 3.7          | 4.8          |            |                |      |          |       |     |       | peroxisomal biogenesis factor 6                                    | 7.29E-01 | N        |          |          |
| <i>RGD1304879</i> | 1.34  | 4.13E-03 | 3.37E-02 | 13.7         | 18.4         |            |                |      |          |       |     |       |                                                                    | 1.90E-01 | N        |          |          |
| <i>Fzd1</i>       | 1.30  | 4.13E-03 | 3.37E-02 | 20.3         | 26.3         |            | 1              |      |          |       |     | 2.15  | frizzled family receptor 1                                         | 6.64E-19 | Y        |          |          |
| <i>LOC297756</i>  | 1.59  | 4.14E-03 | 3.38E-02 | 5.0          | 8.0          |            |                |      |          |       |     |       |                                                                    | 5.40E-01 | N        |          |          |
| <i>Fmn1</i>       | 1.30  | 4.20E-03 | 3.43E-02 | 21.4         | 27.8         |            | 1              |      |          |       |     | 1.59  | formin-like 1                                                      | 5.84E-08 | Y        |          |          |
| <i>RGD1565236</i> | -1.66 | 4.21E-03 | 3.43E-02 | 7.6          | 4.6          |            |                |      |          |       |     | -1.71 |                                                                    | 4.88E-03 | Y        |          |          |
| <i>Grm3</i>       | -1.29 | 4.22E-03 | 3.43E-02 | 38.1         | 29.5         |            | 2              |      | 1        |       |     |       | glutamate receptor, metabotropic 3                                 | 9.46E-01 | N        |          |          |
| <i>Gps2</i>       | 1.35  | 4.22E-03 | 3.43E-02 | 14.2         | 19.2         |            |                |      |          |       |     |       | G protein pathway suppressor 2                                     | 2.07E-01 | N        |          |          |
| <i>Accn4</i>      | -1.35 | 4.23E-03 | 3.44E-02 | 10.3         | 7.6          |            | 1              |      |          |       |     | -1.46 | amiloride-sensitive cation channel 4, pituitary                    | 4.59E-04 | Y        |          |          |
| <i>MGC95152</i>   | -1.31 | 4.23E-03 | 3.44E-02 | 36.4         | 27.7         |            |                |      |          |       |     |       |                                                                    | 7.65E-02 | N        |          |          |
| <i>Tmem132b</i>   | -1.40 | 4.25E-03 | 3.45E-02 | 15.2         | 10.9         |            |                |      |          |       |     |       | transmembrane protein 132B                                         | 5.35E-01 | N        |          |          |
| <i>Sh3bgr</i>     | 1.39  | 4.25E-03 | 3.45E-02 | 11.0         | 15.3         |            | 1              |      | 1        |       |     | 2.90  | SH3 domain binding glutamic acid-rich protein                      | 2.41E-15 | Y        |          |          |
| <i>Tmem196</i>    | -1.39 | 4.26E-03 | 3.46E-02 | 10.3         | 7.4          |            |                |      |          |       |     |       | transmembrane protein 196                                          | 4.15E-01 | N        |          |          |
| <i>Anxa1</i>      | 1.54  | 4.28E-03 | 3.47E-02 | 3.2          | 4.9          |            |                |      |          |       |     | 1.87  | annexin A1                                                         | 8.57E-08 | Y        |          |          |
| <i>Onecut1</i>    | -1.59 | 4.29E-03 | 3.47E-02 | 2.3          | 1.5          |            |                |      |          |       |     |       | one cut homeobox 1                                                 | 2.86E-01 | N        |          |          |
| <i>Cyp4b1</i>     | -1.77 | 4.30E-03 | 3.48E-02 | 1.7          | 1.0          |            |                |      |          |       |     |       | cytochrome P450, family 4, subfamily B, polypeptide 1              | 8.70E-01 | N        |          |          |
| <i>Sema3a</i>     | 1.38  | 4.34E-03 | 3.51E-02 | 5.9          | 8.2          |            |                |      |          |       |     | 2.00  | sema domain, immunoglobulin domain (Ig), short basic domain, secr  | 1.71E-10 | Y        |          |          |
| <i>Gpr34</i>      | -1.44 | 4.37E-03 | 3.53E-02 | 8.7          | 6.1          | 1          |                |      |          |       |     | -1.47 | G protein-coupled receptor 34                                      | 1.51E-03 | Y        |          |          |
| <i>Alg11</i>      | -1.30 | 4.38E-03 | 3.54E-02 | 48.9         | 37.7         |            |                |      |          |       |     | -1.32 | asparagine-linked glycosylation 11, alpha-1,2-mannosyltransferase  | 1.84E-03 | Y        |          |          |
| <i>Ubc</i>        | -1.28 | 4.38E-03 | 3.54E-02 | 314.3        | 246.5        |            |                |      | 1        |       |     | -1.33 | ubiquitin C                                                        | 5.30E-04 | Y        |          |          |
| <i>Trabd</i>      | 1.33  | 4.41E-03 | 3.55E-02 | 11.6         | 15.4         |            | 1              |      |          |       |     | 1.27  | TraB domain containing                                             | 2.43E-02 | Y        |          |          |
| <i>Apba3</i>      | 1.35  | 4.44E-03 | 3.58E-02 | 10.5         | 14.2         | 1          |                |      |          |       |     | 1.32  | amyloid beta (A4) precursor protein-binding, family A, member 3 // | 1.09E-02 | Y        |          |          |
| <i>Irak3</i>      | -1.58 | 4.46E-03 | 3.59E-02 | 1.9          | 1.2          |            |                |      |          |       |     |       | interleukin-1 receptor-associated kinase 3                         | 1.67E-01 | N        |          |          |
| <i>Folh1</i>      | -1.30 | 4.49E-03 | 3.61E-02 | 31.1         | 24.0         |            | 2              |      |          |       |     |       | folate hydrolase (prostate-specific membrane antigen) 1            | 9.49E-02 | N        |          |          |
| <i>Vof16</i>      | -1.31 | 4.49E-03 | 3.61E-02 | 26.2         | 19.9         | 2          | 3              |      |          |       |     | -1.23 | ischemia related factor vof-16                                     | 9.49E-04 | Y        | Y        |          |
| <i>Met</i>        | -1.69 | 4.49E-03 | 3.61E-02 | 1.0          | 0.6          |            |                |      |          |       |     | -1.55 | met proto-oncogene (hepatocyte growth factor receptor)             | 6.97E-05 | Y        |          |          |
| <i>Itgb5</i>      | 1.29  | 4.49E-03 | 3.61E-02 | 27.0         | 34.9         |            | 1              |      |          |       |     | 1.59  | integrin, beta 5                                                   | 5.78E-08 | Y        |          |          |
| <i>Igsf10</i>     | 1.35  | 4.53E-03 | 3.64E-02 | 2.3          | 3.1          |            |                |      |          |       |     | 1.66  | immunoglobulin superfamily, member 10                              | 2.38E-07 | Y        |          |          |

Supplementary Table 1

| gene              | FC    | Pvalue   | FDR      | control RPKM | alcohol RPKM | P drinking | P vs. NP naïve | GWAS | GE in PM | AcbSh | CeA | DRN   | gene title                                                                                                                                                                                                                                                                                             | DRN FDR  | same dir | PAG+ ACB | PAG+ CeA |
|-------------------|-------|----------|----------|--------------|--------------|------------|----------------|------|----------|-------|-----|-------|--------------------------------------------------------------------------------------------------------------------------------------------------------------------------------------------------------------------------------------------------------------------------------------------------------|----------|----------|----------|----------|
| <i>Abcg3l1</i>    | -1.53 | 4.53E-03 | 3.64E-02 | 3.6          | 2.4          |            | 1              |      |          |       |     |       | similar to ATP-binding cassette sub-family G member 3; similar to ATP-binding cassette, sub-family G (WHITE), member 3; ATP-binding cassette, sub-family G (WHITE), member 3-like 1; ATP-binding cassette, sub-family G (WHITE), member 3; ATP-binding cassette, sub-family G (WHITE), member 3-like 2 | 6.58E-01 | N        |          |          |
| <i>Chrm3</i>      | -1.51 | 4.54E-03 | 3.64E-02 | 2.9          | 1.9          |            |                | 1    |          |       |     | -2.44 | cholinergic receptor, nicotinic, beta 3 (neuronal)                                                                                                                                                                                                                                                     | 1.23E-03 | Y        |          |          |
| <i>Slc25a29</i>   | 1.39  | 4.56E-03 | 3.66E-02 | 6.2          | 8.6          |            |                |      |          |       |     |       | solute carrier family 25 (mitochondrial carnitine/acylcarnitine)                                                                                                                                                                                                                                       | 4.21E-01 | N        |          |          |
| <i>Aig1</i>       | 1.29  | 4.57E-03 | 3.66E-02 | 66.1         | 85.3         |            |                |      |          |       |     |       | androgen-induced 1                                                                                                                                                                                                                                                                                     | 8.52E-02 | N        |          |          |
| <i>Pik3r2</i>     | 1.29  | 4.59E-03 | 3.67E-02 | 29.4         | 37.9         |            |                |      | 1        |       |     |       | phosphoinositide-3-kinase, regulatory subunit 2 (beta)                                                                                                                                                                                                                                                 | 6.23E-02 | N        |          |          |
| <i>Slc6a13</i>    | 1.37  | 4.60E-03 | 3.68E-02 | 7.2          | 9.9          |            |                |      |          |       |     | 1.80  | solute carrier family 6 (neurotransmitter transporter, GABA), me                                                                                                                                                                                                                                       | 7.00E-09 | Y        |          |          |
| <i>Prkar2b</i>    | -1.31 | 4.61E-03 | 3.68E-02 | 16.3         | 12.4         |            | 1              |      |          |       |     | -1.57 | protein kinase, cAMP-dependent, regulatory, type II, beta                                                                                                                                                                                                                                              | 9.43E-08 | Y        |          |          |
| <i>Gabrg1</i>     | -1.29 | 4.62E-03 | 3.69E-02 | 65.8         | 50.9         | 1          |                |      |          |       |     | -1.22 | gamma-aminobutyric acid (GABA) A receptor, gamma 1                                                                                                                                                                                                                                                     | 3.47E-02 | Y        |          |          |
| <i>Mrpl13</i>     | -1.37 | 4.63E-03 | 3.70E-02 | 25.5         | 18.6         |            |                |      |          |       |     |       | mitochondrial ribosomal protein L13                                                                                                                                                                                                                                                                    | 3.18E-01 | N        |          |          |
| <i>Fbln1</i>      | 1.36  | 4.64E-03 | 3.70E-02 | 5.8          | 7.9          |            | 1              |      | 1        |       |     | 1.48  | fibulin 1                                                                                                                                                                                                                                                                                              | 2.35E-04 | Y        |          |          |
| <i>Ncln</i>       | 1.29  | 4.65E-03 | 3.70E-02 | 25.4         | 32.9         |            |                |      |          |       |     |       | nicalin                                                                                                                                                                                                                                                                                                | 3.76E-01 | N        |          |          |
| <i>Rhebl1</i>     | 1.55  | 4.66E-03 | 3.71E-02 | 3.4          | 5.2          |            |                |      |          |       |     |       | Ras homolog enriched in brain like 1                                                                                                                                                                                                                                                                   | 8.39E-01 | N        |          |          |
| <i>Sema7a</i>     | 1.28  | 4.70E-03 | 3.74E-02 | 93.1         | 119.0        |            |                |      | 1        |       |     | 2.19  | semaphorin 7A, GPI membrane anchor (John Milton Hagen blood group)                                                                                                                                                                                                                                     | 1.16E-23 | Y        |          |          |
| <i>Cabp1</i>      | 1.32  | 4.70E-03 | 3.74E-02 | 22.3         | 29.3         |            |                |      |          |       |     | 1.61  | calcium binding protein 1                                                                                                                                                                                                                                                                              | 6.36E-07 | Y        |          |          |
| <i>Tm7sf2</i>     | -1.37 | 4.71E-03 | 3.74E-02 | 13.1         | 9.5          | 1          |                |      |          |       |     |       | transmembrane 7 superfamily member 2                                                                                                                                                                                                                                                                   | 2.59E-01 | N        |          |          |
| <i>Cry1</i>       | 1.30  | 4.71E-03 | 3.74E-02 | 19.9         | 25.8         |            | 2              |      |          |       |     | 1.76  | cryptochrome 1 (photolyase-like)                                                                                                                                                                                                                                                                       | 1.04E-10 | Y        |          |          |
| <i>Myo7b</i>      | -2.64 | 4.72E-03 | 3.75E-02 | 0.2          | 0.1          |            |                |      |          |       |     |       | myosin VIIb                                                                                                                                                                                                                                                                                            | 0.00E+00 | N        |          |          |
| <i>Per2</i>       | 1.28  | 4.73E-03 | 3.75E-02 | 22.4         | 28.8         | 1          | 1              |      |          |       |     | 1.59  | period homolog 2 (Drosophila)                                                                                                                                                                                                                                                                          | 2.36E-08 | Y        |          |          |
| <i>RGD1309735</i> | 1.34  | 4.76E-03 | 3.77E-02 | 35.8         | 48.0         |            |                |      |          |       |     | 1.28  |                                                                                                                                                                                                                                                                                                        | 2.05E-02 | Y        |          |          |
| <i>Njpal4</i>     | -1.39 | 4.76E-03 | 3.77E-02 | 4.9          | 3.5          |            |                |      |          |       |     | -1.52 | NIPA-like domain containing 4                                                                                                                                                                                                                                                                          | 1.77E-04 | Y        |          |          |
| <i>Msrb2</i>      | -1.41 | 4.76E-03 | 3.77E-02 | 12.4         | 8.8          |            |                |      | 1        |       |     | -1.33 | methionine sulfoxide reductase B2                                                                                                                                                                                                                                                                      | 1.13E-02 | Y        |          |          |
| <i>Ccdc113</i>    | 1.41  | 4.76E-03 | 3.77E-02 | 8.4          | 11.8         |            |                |      |          |       |     | 1.60  | coiled-coil domain containing 113                                                                                                                                                                                                                                                                      | 2.07E-05 | Y        |          |          |
| <i>Sumo2</i>      | 1.32  | 4.77E-03 | 3.77E-02 | 29.0         | 38.3         |            |                |      |          |       |     |       | SMT3 suppressor of mif two 3 homolog 2 (S. cerevisiae)                                                                                                                                                                                                                                                 | 8.19E-01 | N        |          |          |
| <i>Pafah1b1</i>   | -1.27 | 4.78E-03 | 3.78E-02 | 241.6        | 189.9        | 1          |                |      | 2        |       |     | -1.23 | platelet-activating factor acetylhydrolase 1b, regulator                                                                                                                                                                                                                                               | 1.88E-02 | Y        |          |          |
| <i>Fxyd7</i>      | 1.31  | 4.80E-03 | 3.79E-02 | 66.2         | 86.5         |            |                |      |          |       |     | 1.30  | FXD domain containing ion transport regulator 7                                                                                                                                                                                                                                                        | 7.88E-03 | Y        |          |          |
| <i>Smtn</i>       | 1.45  | 4.80E-03 | 3.79E-02 | 2.2          | 3.2          |            | 1              |      |          |       |     | 1.60  | smoothelin                                                                                                                                                                                                                                                                                             | 3.49E-03 | Y        |          |          |
| <i>Elovl1</i>     | -1.32 | 4.83E-03 | 3.81E-02 | 41.5         | 31.3         |            |                |      |          |       |     |       | ELOVL fatty acid elongase 1                                                                                                                                                                                                                                                                            | 6.34E-01 | N        |          |          |
| <i>Fbxl4</i>      | -1.34 | 4.83E-03 | 3.81E-02 | 11.7         | 8.7          |            |                |      | 1        |       |     | -1.26 | F-box and leucine-rich repeat protein 4                                                                                                                                                                                                                                                                | 2.83E-02 | Y        |          |          |
| <i>Ccdc126</i>    | -1.34 | 4.83E-03 | 3.81E-02 | 12.3         | 9.2          |            |                |      |          |       |     |       | coiled-coil domain containing 126                                                                                                                                                                                                                                                                      | 9.04E-01 | N        |          |          |
| <i>Cxxc5</i>      | 1.29  | 4.88E-03 | 3.84E-02 | 32.3         | 41.8         |            | 2              |      |          |       |     | 1.50  | CXXC finger protein 5                                                                                                                                                                                                                                                                                  | 2.91E-06 | Y        |          |          |
| <i>Dpp4</i>       | -1.55 | 4.88E-03 | 3.84E-02 | 1.5          | 0.9          |            |                | 1    | 1        |       |     |       | dipeptidyl-peptidase 4                                                                                                                                                                                                                                                                                 | 2.97E-01 | N        |          |          |
| <i>Prss23</i>     | 1.47  | 4.89E-03 | 3.84E-02 | 3.3          | 4.9          | 1          | 1              |      |          |       |     |       | protease, serine, 23                                                                                                                                                                                                                                                                                   | 7.40E-02 | N        |          |          |

Supplementary Table 1

| gene              | FC    | Pvalue   | FDR      | control RPKM | alcohol RPKM | P drinking | P vs. NP naïve | GWAS | GE in PM | AcbSh | CeA | DRN   | gene title                                                                  | DRN FDR  | same dir | PAG+ ACB | PAG+ CeA |
|-------------------|-------|----------|----------|--------------|--------------|------------|----------------|------|----------|-------|-----|-------|-----------------------------------------------------------------------------|----------|----------|----------|----------|
| <i>Aifm2</i>      | -1.33 | 4.90E-03 | 3.85E-02 | 10.4         | 7.9          |            |                |      |          |       |     | -1.24 | apoptosis-inducing factor, mitochondrion-associated, 2                      | 3.95E-02 | Y        |          |          |
| <i>Pan2</i>       | 1.29  | 4.90E-03 | 3.85E-02 | 19.5         | 25.3         |            |                |      |          |       |     | 1.45  | PAN2 poly(A) specific ribonuclease subunit homolog ( <i>S. cerevisiae</i> ) | 3.25E-05 | Y        |          |          |
| <i>Pmf1p1</i>     | -1.63 | 4.93E-03 | 3.87E-02 | 1.4          | 0.9          |            |                |      |          |       |     | -1.70 | polyamine modulated factor 1 binding protein 1                              | 3.43E-02 | Y        |          |          |
| <i>Ccdc88b</i>    | 1.30  | 4.93E-03 | 3.87E-02 | 15.3         | 19.9         |            | 1              |      |          |       |     | 1.25  | coiled-coil domain containing 88B                                           | 2.55E-02 | Y        |          |          |
| <i>Ahi1</i>       | -1.27 | 4.94E-03 | 3.87E-02 | 200.6        | 157.7        | 2          | 2              |      | 1        | -1.37 |     | -1.40 | Abelson helper integration site 1                                           | 3.00E-05 | Y        | Y        |          |
| <i>Sbno2</i>      | 1.34  | 4.95E-03 | 3.88E-02 | 4.8          | 6.5          |            |                |      |          |       |     | 1.37  | strawberry notch homolog 2 ( <i>Drosophila</i> )                            | 2.89E-03 | Y        |          |          |
| <i>Man1c1</i>     | 1.32  | 4.97E-03 | 3.89E-02 | 8.8          | 11.6         |            | 1              |      |          |       |     | 1.74  | mannosidase, alpha, class 1C, member 1                                      | 4.76E-09 | Y        |          |          |
| <i>Atp5f1</i>     | -1.28 | 4.98E-03 | 3.89E-02 | 228.0        | 178.6        |            | 1              |      |          |       |     | -1.25 | ATP synthase, H <sup>+</sup> transporting, mitochondrial Fo complex, s      | 9.05E-03 | Y        |          |          |
| <i>Rangrf</i>     | 1.40  | 4.98E-03 | 3.89E-02 | 12.8         | 17.9         |            | 1              |      |          |       |     |       | RAN guanine nucleotide release factor                                       | 7.80E-02 | N        |          |          |
| <i>Asns</i>       | -1.30 | 4.98E-03 | 3.89E-02 | 38.9         | 30.0         |            | 2              |      |          |       |     | -1.40 | asparagine synthetase (glutamine-hydrolyzing)                               | 1.03E-04 | Y        |          |          |
| <i>Fbxw4</i>      | 1.30  | 5.00E-03 | 3.90E-02 | 28.6         | 37.2         |            |                |      |          |       |     | 1.33  | F-box and WD repeat domain containing 4                                     | 1.98E-03 | Y        |          |          |
| <i>Rasd2</i>      | -1.31 | 5.01E-03 | 3.91E-02 | 17.3         | 13.3         | 1          | 2              |      |          |       |     |       | RASD family, member 2                                                       | 6.80E-01 | N        |          |          |
| <i>Pth2r</i>      | -1.98 | 5.02E-03 | 3.91E-02 | 0.0          | 0.0          |            |                |      |          |       |     |       | parathyroid hormone 2 receptor                                              | 0.00E+00 | N        |          |          |
| <i>Lgals8</i>     | -1.29 | 5.02E-03 | 3.91E-02 | 38.4         | 29.7         |            | 1              |      | 1        |       |     | -1.24 | lectin, galactoside-binding, soluble, 8                                     | 1.67E-02 | Y        |          |          |
| <i>RGD1310572</i> | -2.33 | 5.03E-03 | 3.91E-02 | 1.1          | 0.5          |            |                |      |          |       |     | -1.66 | sodium channel, voltage-gated, type IX, alpha subunit                       | 1.22E-03 | Y        |          |          |
| <i>Scn9a</i>      | -1.30 | 5.04E-03 | 3.92E-02 | 6.6          | 5.0          |            |                | 1    |          |       |     | -1.91 | alpha subunit                                                               | 7.89E-17 | Y        |          |          |
| <i>Aqp11</i>      | -1.40 | 5.06E-03 | 3.94E-02 | 11.5         | 8.2          |            | 2              |      |          |       |     | -1.52 | aquaporin 11                                                                | 9.68E-05 | Y        |          |          |
| <i>Fat1</i>       | 1.27  | 5.07E-03 | 3.94E-02 | 67.2         | 85.4         |            | 2              |      |          |       |     | 2.05  | FAT tumor suppressor homolog 1 ( <i>Drosophila</i> )                        | 4.19E-21 | Y        |          |          |
| <i>Ppp1cc</i>     | 1.27  | 5.07E-03 | 3.94E-02 | 137.5        | 175.2        |            |                |      |          |       |     | 1.30  | protein phosphatase 1, catalytic subunit, gamma isozyme                     | 2.03E-03 | Y        |          |          |
| <i>RGD1560888</i> | -1.42 | 5.08E-03 | 3.94E-02 | 25.5         | 18.0         |            |                |      |          |       |     |       |                                                                             | 9.21E-01 | N        |          |          |
| <i>Cry2</i>       | 1.28  | 5.12E-03 | 3.97E-02 | 67.2         | 86.1         |            | 1              |      |          |       |     | 1.25  | cryptochrome 2 (photolyase-like)                                            | 1.37E-02 | Y        |          |          |
| <i>Shhg4</i>      | -1.52 | 5.13E-03 | 3.98E-02 | 29.3         | 19.3         |            |                |      |          |       |     | -1.75 |                                                                             | 3.78E-07 | Y        |          |          |
| <i>Tmx1</i>       | -1.28 | 5.19E-03 | 4.02E-02 | 132.7        | 104.0        |            |                |      |          |       |     | -1.49 | thioredoxin-related transmembrane protein 1                                 | 6.59E-07 | Y        |          |          |
| <i>LOC296884</i>  | 1.30  | 5.21E-03 | 4.03E-02 | 23.3         | 30.2         |            |                |      |          |       |     | 1.36  |                                                                             | 7.37E-04 | Y        |          |          |
| <i>Cpeb1</i>      | -1.31 | 5.22E-03 | 4.04E-02 | 17.6         | 13.4         |            | 1              |      |          |       |     | -1.32 | cytoplasmic polyadenylation element binding protein 1                       | 2.40E-03 | Y        |          |          |
| <i>Bcl2l11</i>    | 1.75  | 5.22E-03 | 4.04E-02 | 3.2          | 5.6          |            |                |      |          |       |     |       | BCL2-like 11 (apoptosis facilitator)                                        | 9.83E-02 | N        |          |          |
| <i>Mapk6</i>      | -1.28 | 5.23E-03 | 4.04E-02 | 39.9         | 31.2         |            | 1              |      | 1        |       |     |       | mitogen-activated protein kinase 6                                          | 5.13E-01 | N        |          |          |
| <i>Tp73</i>       | 1.36  | 5.23E-03 | 4.04E-02 | 3.2          | 4.4          |            |                |      |          |       |     | 2.31  | tumor protein p73                                                           | 1.97E-15 | Y        |          |          |
| <i>Gpr182</i>     | 1.58  | 5.28E-03 | 4.07E-02 | 1.8          | 2.8          |            |                |      |          |       |     | 2.48  | G protein-coupled receptor 182                                              | 3.24E-12 | Y        |          |          |
| <i>Gna12</i>      | -1.29 | 5.29E-03 | 4.08E-02 | 28.6         | 22.2         |            |                |      |          |       |     |       | guanine nucleotide binding protein (G protein) alpha 12                     | 8.87E-01 | N        |          |          |
| <i>Cdc42ep1</i>   | 1.31  | 5.31E-03 | 4.09E-02 | 18.3         | 23.9         |            | 1              |      |          |       |     | 1.50  | CDC42 effector protein (Rho GTPase binding) 1                               | 1.66E-05 | Y        |          |          |
| <i>Phyhip</i>     | 1.27  | 5.31E-03 | 4.09E-02 | 104.7        | 133.3        |            | 1              |      |          |       |     | 1.74  | phytanoyl-CoA 2-hydroxylase interacting protein                             | 2.28E-12 | Y        |          |          |
| <i>Ccdc65</i>     | 1.33  | 5.32E-03 | 4.10E-02 | 14.4         | 19.0         |            |                |      |          |       |     | 1.35  | coiled-coil domain containing 65                                            | 2.15E-03 | Y        |          |          |
| <i>Yod1</i>       | 1.37  | 5.33E-03 | 4.10E-02 | 15.5         | 21.2         |            |                |      |          |       |     | 1.30  | YOD1 OTU deubiquinating enzyme 1 homolog ( <i>S. cerevisiae</i> )           | 3.59E-02 | Y        |          |          |

Supplementary Table 1

| gene              | FC    | Pvalue   | FDR      | control RPKM | alcohol RPKM | P drinking | P vs. NP naïve | GWAS | GE in PM | AcbSh | CeA | DRN   | gene title                                                          | DRN FDR  | same dir | PAG+ ACB | PAG+ CeA |
|-------------------|-------|----------|----------|--------------|--------------|------------|----------------|------|----------|-------|-----|-------|---------------------------------------------------------------------|----------|----------|----------|----------|
| <i>Ggps1</i>      | -1.29 | 5.33E-03 | 4.10E-02 | 33.5         | 25.9         | 1          |                |      | 1        |       |     | -1.24 | geranylgeranyl diphosphate synthase 1                               | 2.15E-02 | Y        |          |          |
| <i>Gdi2</i>       | -1.27 | 5.34E-03 | 4.10E-02 | 179.0        | 140.8        |            |                |      |          |       |     | -1.21 | GDP dissociation inhibitor 2                                        | 3.27E-02 | Y        |          |          |
| <i>Trappc1</i>    | -1.37 | 5.34E-03 | 4.10E-02 | 35.0         | 25.6         |            |                |      |          |       |     |       | trafficking protein particle complex 1                              | 9.22E-01 | N        |          |          |
| <i>Scnn1a</i>     | -1.61 | 5.36E-03 | 4.11E-02 | 1.4          | 0.9          |            |                |      |          |       |     | -1.45 | sodium channel, non-voltage-gated 1 alpha subunit                   | 3.73E-02 | Y        |          |          |
| <i>Dydc2</i>      | 1.73  | 5.37E-03 | 4.12E-02 | 2.3          | 4.0          |            |                |      |          |       |     | 1.89  | DPY30 domain containing 2                                           | 1.07E-03 | Y        |          |          |
| <i>Wnt3</i>       | 1.53  | 5.40E-03 | 4.14E-02 | 1.4          | 2.2          |            |                |      |          |       |     | 1.50  | wingless-type MMTV integration site family, member 3                | 2.73E-02 | Y        |          |          |
| <i>Zfp469</i>     | 1.28  | 5.41E-03 | 4.14E-02 | 17.2         | 22.0         |            |                |      |          |       |     | 1.29  |                                                                     | 3.47E-03 | Y        |          |          |
| <i>Tbc1d2</i>     | 1.46  | 5.41E-03 | 4.14E-02 | 1.6          | 2.3          |            |                | 1    |          |       |     |       | TBC1 domain family, member 2                                        | 7.89E-02 | N        |          |          |
| <i>Bles03</i>     | 1.30  | 5.46E-03 | 4.17E-02 | 29.5         | 38.3         |            |                |      |          |       |     |       | basophilic leukemia expressed protein BLES03                        | 3.78E-01 | N        |          |          |
| <i>Vegfb</i>      | -1.32 | 5.46E-03 | 4.17E-02 | 20.5         | 15.5         |            | 2              |      | 1        |       |     |       | vascular endothelial growth factor B                                | 3.78E-01 | N        |          |          |
| <i>C1ql3</i>      | -1.59 | 5.48E-03 | 4.19E-02 | 6.7          | 4.2          |            |                |      | 1        |       |     |       | complement component 1, q subcomponent-like 3                       | 1.41E-01 | N        |          |          |
| <i>Atp6v1d</i>    | -1.28 | 5.51E-03 | 4.21E-02 | 114.6        | 89.5         |            |                |      |          |       |     | -1.26 | ATPase, H+ transporting, lysosomal 34kDa, V1 subunit D              | 7.83E-03 | Y        |          |          |
| <i>Epha5</i>      | -1.28 | 5.53E-03 | 4.22E-02 | 13.9         | 10.8         |            | 1              | 1    |          |       |     | -1.51 | EPH receptor A5                                                     | 2.12E-07 | Y        |          |          |
| <i>Nkain4</i>     | 1.34  | 5.54E-03 | 4.22E-02 | 30.2         | 40.4         |            | 1              | 1    |          |       |     | 1.45  | Na+/K+ transporting ATPase interacting 4                            | 4.59E-04 | Y        |          |          |
| <i>Galr2</i>      | -1.48 | 5.54E-03 | 4.22E-02 | 6.9          | 4.7          |            | 2              |      |          |       |     | -1.76 | galanin receptor 2                                                  | 1.51E-05 | Y        |          |          |
| <i>Kcng2</i>      | -1.78 | 5.57E-03 | 4.24E-02 | 1.7          | 0.9          |            |                |      |          |       |     |       | potassium voltage-gated channel, subfamily G, member 2              | 2.77E-01 | N        |          |          |
| <i>Tgfb1i1</i>    | -1.56 | 5.59E-03 | 4.25E-02 | 2.9          | 1.8          |            | 1              |      |          |       |     |       | transforming growth factor beta 1 induced transcript 1              | 7.01E-02 | N        |          |          |
| <i>Mei2d</i>      | 1.29  | 5.64E-03 | 4.29E-02 | 36.7         | 47.2         |            |                |      |          |       |     | 1.33  | myocyte enhancer factor 2D                                          | 1.80E-03 | Y        |          |          |
| <i>Mpst</i>       | 1.37  | 5.67E-03 | 4.31E-02 | 12.3         | 16.8         |            |                |      |          |       |     |       | mercaptopyruvate sulfurtransferase                                  | 8.67E-02 | N        |          |          |
| <i>RGD1560455</i> | -2.26 | 5.68E-03 | 4.31E-02 | 0.0          | 0.0          |            |                |      |          |       |     |       |                                                                     | 0.00E+00 | N        |          |          |
| <i>Bag2</i>       | 1.33  | 5.68E-03 | 4.31E-02 | 15.2         | 20.3         |            | 1              |      |          |       |     | 1.25  | BCL2-associated athanogene 2                                        | 4.79E-02 | Y        |          |          |
| <i>Cdc20</i>      | 2.05  | 5.72E-03 | 4.34E-02 | 0.0          | 0.0          |            |                |      |          |       |     |       | cell division cycle 20 homolog (S. cerevisiae)                      | 0.00E+00 | N        |          |          |
| <i>Vps4b</i>      | -1.28 | 5.76E-03 | 4.37E-02 | 37.1         | 28.9         |            |                |      |          |       |     | -1.28 | vacuolar protein sorting 4 homolog B (S. cerevisiae)                | 5.93E-03 | Y        |          |          |
| <i>Trpc4ap</i>    | -1.28 | 5.79E-03 | 4.39E-02 | 55.2         | 43.3         |            |                |      |          |       |     |       | transient receptor potential cation channel, subfamily C, member    | 5.68E-01 | N        |          |          |
| <i>Mmp15</i>      | -1.31 | 5.80E-03 | 4.39E-02 | 11.3         | 8.6          |            | 1              |      |          |       |     |       | matrix metalloproteinase 15 (membrane-inserted)                     | 7.04E-01 | N        |          |          |
| <i>Prickle2</i>   | -1.27 | 5.81E-03 | 4.39E-02 | 25.8         | 20.3         |            | 1              |      | 1        |       |     | -1.36 | prickle homolog 2 (Drosophila)                                      | 1.92E-04 | Y        |          |          |
| <i>Shox2</i>      | -1.35 | 5.81E-03 | 4.39E-02 | 14.4         | 10.7         |            |                |      | 1        |       |     | -1.45 | short stature homeobox 2                                            | 7.13E-03 | Y        |          |          |
| <i>Trhr2</i>      | -1.43 | 5.83E-03 | 4.40E-02 | 10.4         | 7.3          |            |                |      |          |       |     |       |                                                                     | 5.57E-01 | N        |          |          |
| <i>Strada</i>     | 1.31  | 5.83E-03 | 4.40E-02 | 17.1         | 22.4         |            |                |      |          |       |     |       | STE20-related kinase adaptor alpha                                  | 1.13E-01 | N        |          |          |
| <i>Lrrc32</i>     | 1.51  | 5.83E-03 | 4.40E-02 | 1.1          | 1.7          |            |                |      |          |       |     | 1.43  | leucine rich repeat containing 32                                   | 4.05E-02 | Y        |          |          |
| <i>Toe1</i>       | 1.40  | 5.83E-03 | 4.40E-02 | 6.8          | 9.5          |            |                |      |          |       |     |       | target of EGR1, member 1 (nuclear)                                  | 1.57E-01 | N        |          |          |
| <i>Ntrk3</i>      | 1.27  | 5.84E-03 | 4.41E-02 | 83.6         | 106.2        | 1          |                |      |          |       |     |       | neurotrophic tyrosine kinase, receptor, type 3                      | 1.11E-01 | N        |          |          |
| <i>Mvp</i>        | 1.31  | 5.85E-03 | 4.41E-02 | 12.4         | 16.2         |            |                |      |          |       |     |       | major vault protein                                                 | 9.27E-02 | N        |          |          |
| <i>Lmcd1</i>      | 1.45  | 5.85E-03 | 4.41E-02 | 3.9          | 5.7          |            | 1              |      |          |       |     | 1.64  | LIM and cysteine-rich domains 1                                     | 4.60E-04 | Y        |          |          |
| <i>Slc2a4</i>     | 1.46  | 5.85E-03 | 4.41E-02 | 2.4          | 3.5          |            |                |      |          |       |     | 1.95  | solute carrier family 2 (facilitated glucose transporter), member 4 | 3.59E-06 | Y        |          |          |
| <i>Ispd</i>       | -1.34 | 5.87E-03 | 4.42E-02 | 9.4          | 7.0          |            |                |      |          |       |     | -1.31 |                                                                     | 1.37E-02 | Y        |          |          |

Supplementary Table 1

| gene                | FC    | Pvalue   | FDR      | control RPKM | alcohol RPKM | P drinking | P vs. NP naïve | GWAS | GE in PM | AcbSh | CeA  | DRN   | gene title                                                                                                               | DRN FDR  | same dir | PAG+ ACB | PAG+ CeA |
|---------------------|-------|----------|----------|--------------|--------------|------------|----------------|------|----------|-------|------|-------|--------------------------------------------------------------------------------------------------------------------------|----------|----------|----------|----------|
| <i>RGD1560672</i>   | 1.41  | 5.88E-03 | 4.42E-02 | 5.2          | 7.4          |            |                |      |          |       |      | 2.45  |                                                                                                                          | 6.60E-13 | Y        |          |          |
| <i>Dagla</i>        | 1.28  | 5.91E-03 | 4.44E-02 | 19.1         | 24.4         |            |                |      | 1        |       |      | 1.76  | diacylglycerol lipase, alpha                                                                                             | 1.03E-11 | Y        |          |          |
| <i>Sumo1</i>        | -1.28 | 5.92E-03 | 4.44E-02 | 91.6         | 71.4         |            |                |      |          |       |      |       | SMT3 suppressor of mif two 3 homolog 1 (S. cerevisiae)                                                                   | 1.27E-01 | N        |          |          |
| <i>Adra1a</i>       | -1.41 | 5.94E-03 | 4.45E-02 | 8.5          | 6.0          |            |                | 1    | 1        |       |      |       | adrenergic, alpha-1A-, receptor                                                                                          | 1.40E-01 | N        |          |          |
| <i>Slc4a7</i>       | -1.32 | 5.96E-03 | 4.46E-02 | 10.2         | 7.7          | 1          |                |      |          |       |      |       | solute carrier family 4, sodium bicarbonate cotransporter, member                                                        | 2.78E-01 | N        |          |          |
| <i>Adrbk2</i>       | 1.29  | 5.96E-03 | 4.47E-02 | 27.1         | 35.1         |            |                |      | 1        |       |      | 1.57  | adrenergic, beta, receptor kinase 2                                                                                      | 4.59E-07 | Y        |          |          |
| <i>Pros1</i>        | -1.39 | 5.97E-03 | 4.47E-02 | 4.6          | 3.3          |            |                |      |          |       |      |       | protein S (alpha)                                                                                                        | 6.79E-01 | N        |          |          |
| <i>Slc6a7</i>       | -1.30 | 5.98E-03 | 4.48E-02 | 22.9         | 17.6         |            | 1              |      |          |       |      | -1.24 | solute carrier family 6 (neurotransmitter transporter, L-proline)                                                        | 2.25E-02 | Y        |          |          |
| <i>Tcerg1l</i>      | 1.32  | 6.00E-03 | 4.49E-02 | 13.1         | 17.3         |            |                |      |          |       |      | 1.72  | transcription elongation regulator 1-like                                                                                | 2.73E-07 | Y        |          |          |
| <i>Drd2</i>         | -1.33 | 6.01E-03 | 4.49E-02 | 11.3         | 8.5          |            | 1              |      |          |       |      |       | dopamine receptor D2                                                                                                     | 5.23E-01 | N        |          |          |
| <i>Hunk</i>         | 1.38  | 6.01E-03 | 4.49E-02 | 5.6          | 7.7          |            |                |      |          |       |      | 1.50  | hormonally up-regulated Neu-associated kinase                                                                            | 2.03E-04 | Y        |          |          |
| <i>Sema3f</i>       | -1.31 | 6.08E-03 | 4.54E-02 | 13.5         | 10.3         |            |                |      |          |       |      |       | sema domain, immunoglobulin domain (Ig), short basic domain, secr                                                        | 2.46E-01 | N        |          |          |
| <i>Pld3</i>         | -1.27 | 6.11E-03 | 4.56E-02 | 184.0        | 145.2        |            | 2              |      |          |       |      | -1.48 | phospholipase D family, member 3                                                                                         | 6.02E-07 | Y        |          |          |
| <i>Ak2</i>          | 1.36  | 6.12E-03 | 4.57E-02 | 7.2          | 9.8          |            |                |      |          |       |      | 1.38  | adenylate kinase 2                                                                                                       | 7.24E-03 | Y        |          |          |
| <i>Furin</i>        | 1.28  | 6.13E-03 | 4.57E-02 | 17.9         | 22.9         |            |                |      |          |       |      | 1.41  | furin (paired basic amino acid cleaving enzyme)                                                                          | 1.04E-04 | Y        |          |          |
| <i>Psm3l</i>        | -1.33 | 6.14E-03 | 4.57E-02 | 31.5         | 23.7         |            |                |      |          |       |      |       |                                                                                                                          | 1.13E-01 | N        |          |          |
| <i>Mir410</i>       | -1.94 | 6.15E-03 | 4.58E-02 | 28.1         | 14.5         |            |                |      |          |       |      | -1.78 | microRNA 410                                                                                                             | 2.05E-02 | Y        |          |          |
| <i>Ppp1r14b</i>     | 1.51  | 6.22E-03 | 4.63E-02 | 6.1          | 9.3          | 1          |                |      |          |       |      |       | protein phosphatase 1, regulatory (inhibitor) subunit 14B                                                                | 9.12E-01 | N        |          |          |
| <i>Ogfod1</i>       | -1.29 | 6.25E-03 | 4.65E-02 | 52.0         | 40.4         |            |                |      |          |       |      | -1.46 | 2-oxoglutarate and iron-dependent oxygenase domain containing 1 / thymocyte selection-associated high mobility group box | 7.18E-06 | Y        |          |          |
| <i>Tox</i>          | -1.35 | 6.26E-03 | 4.65E-02 | 7.1          | 5.3          |            |                |      |          |       |      | -1.49 | signal sequence receptor, alpha                                                                                          | 4.22E-05 | Y        |          |          |
| <i>Ssr1</i>         | -1.27 | 6.26E-03 | 4.65E-02 | 93.8         | 73.8         |            | 1              |      |          |       |      |       | D site of albumin promoter (albumin D-box) binding protein                                                               | 8.22E-02 | N        |          |          |
| <i>Dbp</i>          | 1.28  | 6.28E-03 | 4.66E-02 | 47.7         | 61.1         | 1          | 1              |      | 1        |       | 1.16 | 1.50  | MYC-associated zinc finger protein (purine-binding transcript)                                                           | 2.46E-06 | Y        |          | Y        |
| <i>Maz</i>          | 1.30  | 6.30E-03 | 4.67E-02 | 30.4         | 39.4         |            |                |      |          |       |      | 1.28  | proprotein convertase subtilisin/kexin type 2                                                                            | 1.07E-02 | Y        |          |          |
| <i>Pcsk2</i>        | -1.27 | 6.33E-03 | 4.69E-02 | 69.1         | 54.3         |            | 2              | 1    | 1        |       |      |       | neurotrimin                                                                                                              | 3.49E-01 | N        |          |          |
| <i>Ntm</i>          | 1.27  | 6.33E-03 | 4.69E-02 | 61.2         | 77.9         |            |                |      |          |       |      | 1.25  |                                                                                                                          | 1.39E-02 | Y        |          |          |
| <i>Mthfd2</i>       | -1.44 | 6.34E-03 | 4.69E-02 | 4.6          | 3.2          |            | 1              |      | 1        |       |      |       | methylenetetrahydrofolate dehydrogenase (NADP+ dependent) 2, meth                                                        | 1.32E-01 | N        |          |          |
| <i>Sppl2b</i>       | 1.28  | 6.41E-03 | 4.74E-02 | 34.5         | 44.0         |            |                |      |          |       |      | 1.42  | signal peptide peptidase like 2B                                                                                         | 4.94E-05 | Y        |          |          |
| <i>Znf511</i>       | 1.39  | 6.44E-03 | 4.76E-02 | 8.7          | 12.0         |            |                |      |          |       |      | 1.32  | zinc finger protein 511                                                                                                  | 3.48E-02 | Y        |          |          |
| <i>Mir376a</i>      | -2.32 | 6.44E-03 | 4.76E-02 | 16.6         | 7.2          |            |                |      |          |       |      |       | miRNA 376a                                                                                                               | 6.38E-01 | N        |          |          |
| <i>Mcm2</i>         | 1.37  | 6.44E-03 | 4.76E-02 | 3.9          | 5.3          |            |                |      | 1        |       |      |       | minichromosome maintenance complex component 2                                                                           | 3.45E-01 | N        |          |          |
| <i>Cbx2</i>         | 1.42  | 6.51E-03 | 4.80E-02 | 2.0          | 2.9          |            | 1              |      |          |       |      | 1.42  | chromobox homolog 2                                                                                                      | 3.55E-02 | Y        |          |          |
| <i>LOC100125385</i> | 1.29  | 6.51E-03 | 4.80E-02 | 30.5         | 39.5         |            |                |      |          |       |      |       |                                                                                                                          | 2.53E-01 | N        |          |          |
| <i>Tcp1111</i>      | -1.28 | 6.52E-03 | 4.80E-02 | 40.3         | 31.6         |            |                |      |          |       |      | -1.26 | t-complex 11 (mouse)-like 1                                                                                              | 1.01E-02 | Y        |          |          |
| <i>Fgf14</i>        | 1.30  | 6.54E-03 | 4.81E-02 | 55.3         | 71.8         |            | 1              |      |          |       |      | 1.26  | fibroblast growth factor 14                                                                                              | 2.05E-02 | Y        |          |          |
| <i>Unc119</i>       | -1.32 | 6.54E-03 | 4.82E-02 | 24.6         | 18.6         | 1          | 1              |      |          |       |      | -1.27 | unc-119 homolog (C. elegans)                                                                                             | 1.83E-02 | Y        |          |          |

Supplementary Table 1

| gene              | FC    | Pvalue   | FDR      | control RPKM | alcohol RPKM | P drinking | P vs. NP naïve | GWAS | GE in PM | AcbSh | CeA | DRN   | gene title                                                          | DRN FDR  | same dir | PAG+ ACB | PAG+ CeA |
|-------------------|-------|----------|----------|--------------|--------------|------------|----------------|------|----------|-------|-----|-------|---------------------------------------------------------------------|----------|----------|----------|----------|
| <i>RGD1308059</i> | -1.37 | 6.56E-03 | 4.83E-02 | 14.7         | 10.8         |            |                |      |          |       |     |       |                                                                     | 9.37E-01 | N        |          |          |
| <i>Lrrc9</i>      | 1.34  | 6.57E-03 | 4.83E-02 | 5.6          | 7.5          |            |                |      |          |       |     | 1.39  | leucine rich repeat containing 9                                    | 9.55E-04 | Y        |          |          |
| <i>Rhob</i>       | -1.27 | 6.61E-03 | 4.85E-02 | 122.3        | 96.5         |            |                |      | 2        |       |     |       | ras homolog family member B                                         | 2.47E-01 | N        |          |          |
| <i>Anp32a</i>     | 1.27  | 6.61E-03 | 4.85E-02 | 101.3        | 129.2        | 1          |                |      |          |       |     | 1.33  | acidic (leucine-rich) nuclear phosphoprotein 32 family, member A    | 1.28E-03 | Y        |          |          |
| <i>Cd59</i>       | -1.27 | 6.62E-03 | 4.86E-02 | 114.3        | 89.8         |            | 1              |      | 1        |       |     | -1.27 | CD59 molecule, complement regulatory protein                        | 7.01E-03 | Y        |          |          |
| <i>Wfikkn1</i>    | 1.57  | 6.64E-03 | 4.87E-02 | 2.0          | 3.1          |            |                |      |          |       |     | 1.60  | WAP, follistatin/kazal, immunoglobulin, kunitz and netrin domain    | 2.44E-02 | Y        |          |          |
| <i>Efna5</i>      | -1.40 | 6.68E-03 | 4.90E-02 | 16.6         | 11.8         |            |                | 1    |          |       |     |       | ephrin-A5                                                           | 5.14E-01 | N        |          |          |
| <i>Rnf165</i>     | -1.31 | 6.69E-03 | 4.90E-02 | 6.2          | 4.8          |            | 1              |      |          |       |     | -1.28 | ring finger protein 165                                             | 1.42E-02 | Y        |          |          |
| <i>Smpd13b</i>    | 1.44  | 6.71E-03 | 4.91E-02 | 3.5          | 5.0          |            |                |      |          |       |     | 1.77  | sphingomyelin phosphodiesterase, acid-like 3B                       | 5.45E-05 | Y        |          |          |
| <i>Bcl7c</i>      | 1.40  | 6.71E-03 | 4.91E-02 | 9.0          | 12.6         |            |                |      |          |       |     | 1.46  | B-cell CLL/lymphoma 7C                                              | 2.49E-03 | Y        |          |          |
| <i>RGD1308117</i> | -1.57 | 6.73E-03 | 4.92E-02 | 2.6          | 1.7          |            |                |      |          |       |     |       |                                                                     | 6.93E-02 | N        |          |          |
| <i>Egfr</i>       | -1.34 | 6.74E-03 | 4.92E-02 | 5.8          | 4.4          | 1          |                |      |          |       |     |       | epidermal growth factor receptor                                    | 8.63E-01 | N        |          |          |
| <i>Fgf13</i>      | -1.29 | 6.75E-03 | 4.93E-02 | 32.0         | 24.7         |            | 1              |      |          |       |     | -1.49 | fibroblast growth factor 13                                         | 2.88E-06 | Y        |          |          |
| <i>Rassf8</i>     | 1.32  | 6.75E-03 | 4.93E-02 | 17.0         | 22.5         |            |                |      |          |       |     | 1.39  | Ras association (RalGDS/AF-6) domain family (N-terminal) member 8   | 9.35E-04 | Y        |          |          |
| <i>Ehd3</i>       | -1.28 | 6.76E-03 | 4.93E-02 | 47.8         | 37.4         |            |                |      | 1        |       |     | -1.27 | EH-domain containing 3                                              | 9.12E-03 | Y        |          |          |
| <i>Cd55</i>       | -1.62 | 6.77E-03 | 4.93E-02 | 2.4          | 1.5          |            | 1              |      |          |       |     | -1.61 | CD55 molecule, decay accelerating factor for complement (Cromer blo | 7.73E-05 | Y        |          |          |
| <i>Prr3</i>       | -1.31 | 6.77E-03 | 4.94E-02 | 22.0         | 16.7         |            |                |      |          |       |     |       | proline rich 3                                                      | 2.51E-01 | N        |          |          |
| <i>Slc19a3</i>    | -1.45 | 6.81E-03 | 4.96E-02 | 5.2          | 3.6          |            |                |      |          |       |     |       | solute carrier family 19, member 3                                  | 1.42E-01 | N        |          |          |
| <i>Wif1</i>       | 1.42  | 6.81E-03 | 4.96E-02 | 3.5          | 5.0          |            | 1              |      |          |       |     | 1.43  | WNT inhibitory factor 1                                             | 1.93E-02 | Y        |          |          |
| <i>Itgb8</i>      | -1.28 | 6.83E-03 | 4.97E-02 | 35.8         | 28.0         |            |                |      |          |       |     | -1.24 | integrin, beta 8                                                    | 1.68E-02 | Y        |          |          |
| <i>Ranbp1</i>     | -1.32 | 6.86E-03 | 4.98E-02 | 26.7         | 20.2         |            |                |      |          |       |     | -1.29 | RAN binding protein 1                                               | 1.18E-02 | Y        |          |          |
| <i>Hadh</i>       | -1.34 | 6.87E-03 | 4.99E-02 | 14.4         | 10.7         |            |                |      |          |       |     |       | hydroxyacyl-CoA dehydrogenase                                       | 7.14E-01 | N        |          |          |
| <i>Th</i>         | 1.61  | 6.88E-03 | 4.99E-02 | 1.6          | 2.5          |            |                | 1    |          |       |     |       | tyrosine hydroxylase                                                | 1.58E-01 | N        |          |          |
