# Supplementary material
Source: PubMed Central journal article supplement (PMC4844794)
Supplement: NIHMS765481-supplement-Supp_Table_S3.pdf [file NIHMS765481-supplement-Supp_Table_S3.pdf]

### Supplementary Table 3. IPA upstream analysis

Putative genes, molecules and drugs that could be responsible for changes in gene expression. Genes with FDR  $\leq$  0.05 (from Supplementary Table 1) were analyzed using QIAGEN's Ingenuity® Pathway Analysis. A positive z-score indicates that the regulator, if active, could be responsible for gene changes. Negative z-scores indicate that expression changes are in the opposite direction observed when this molecule is active. Absolute z-score  $\geq$  1.75 shown. Listed by z-score.

P-value of overlap is based on number genes differentially expressed that are also in the list of target genes regardless of direction.

| Upstream Regulator | Fold Chg | Activation z-score | p-value of overlap | Molecule Type           | Target genes in dataset                                                                                                                                                                                                                                                                                                                                                |
|--------------------|----------|--------------------|--------------------|-------------------------|------------------------------------------------------------------------------------------------------------------------------------------------------------------------------------------------------------------------------------------------------------------------------------------------------------------------------------------------------------------------|
| SREBF2             |          | -3.90              | 1.62E-06           | transcription regulator | ACLY, ACSL1, DHCR7, ELOVL6, FDFT1, FDPS, HMGCR, HMGCS1, INSIG1, LDLR, LIPA, NEUROD1, NSDHL, SCD, SQLE, THRSP, TM7SF2                                                                                                                                                                                                                                                   |
| HNF1A              |          | -3.50              | 2.70E-04           | transcription regulator | ADAM32, ADCY10, AK2, ALB, ALS2, APOB, ASGR2, B3GALT5, BCL6, C8G, CD55, CDO1, COL27A1, COL3A1, DPP4, FAM107B, FOLR1, GDI2, GJB1, HMGCR, HOPX, HPX, IGF1, ITIH4, KIF13A, LCAT, LIPA, MAPK15, NR1D1, NR5A2, ONECUT1, PAH, PRLR, RNASE4, SERPINA1, SERPING1, SLC26A1, SLC38A4, SSTR1, Sult1d1, TACR3, TRPM2, UGT1A1, Ugt1a7c, UGT1A9 (includes others), VTN, YPEL3, ZNF365 |
| SCAP               |          | -3.37              | 9.84E-07           | other                   | ACLY, ACSL1, CSAD, DHCR7, EHHADH, ELOVL6, FDFT1, FDPS, HMGCR, INSIG1, LDLR, NSDHL, SCD, SQLE, TM7SF2                                                                                                                                                                                                                                                                   |
| ATP7B              |          | -3.16              | 2.85E-05           | transporter             | ACLY, CDC20, CP, ELOVL6, FDFT1, FDPS, HMGCR, HMGCS1, LDLR, SQLE, THRSP                                                                                                                                                                                                                                                                                                 |
| SREBF1             |          | -3.05              | 3.98E-05           | transcription regulator | ACLY, ACSL1, APOA5, AR, CSAD, DHCR7, DLK1, EHHADH, ELOVL6, ELOVL7, FDFT1, FDPS, HMGCR, HMGCS1, HSPA1A/HSPA1B, INSIG1, LDLR, LGALS3, NR1H3, NSDHL, PIK3R3, PTGDS, SCD, SQLE, TF, THRSP, TM7SF2                                                                                                                                                                          |

| Upstream Regulator                        | Fold Chg | Activation z-score | p-value of overlap | Molecule Type                       | Target genes in dataset                                                                                                                                                                                           |
|-------------------------------------------|----------|--------------------|--------------------|-------------------------------------|-------------------------------------------------------------------------------------------------------------------------------------------------------------------------------------------------------------------|
| wortmannin                                |          | -2.91              | 1.34E-03           | chemical - kinase inhibitor         | AGTR1, BCL2L11, CKB, COL1A1, COL1A2, COL3A1, E2F1, EIF1AX, ERBB3, FOS, GPD1, IGF1, JUN, MAF, MYH11, NR4A1, PTGER4, PTGS2, PXN, RAP1A, TH, TYMP, VIM                                                               |
| INSR                                      |          | -2.66              | 1.53E-04           | kinase                              | ACSL1, ATF3, ATP2A3, ATP5G3, CCNG2, CD83, CDKN2C, CPT1B, DDR2, DHCR7, FBLN1, FDFT1, FDPS, FOS, FURIN, HMGCR, HMGCS1, IGF1, KIT, LCP1, LDB2, MARCKSL1, MYOM2, NR1H3, NSDHL, PAX6, PDK4, RUVBL2, SLC2A4, SQLE, Tpm2 |
| CD3                                       |          | -2.64              | 1.49E-01           | complex                             | BCL2L11, BCL6, BTG1, C1R, CXCR4, DUSP14, FOS, HPX, ID3, IGF1, IL16, ITPR1, JUN, MAF, MTHFD2, NFATC2, NOS1, NR4A1, ORAI3, PTGER4, PTGS2, PTPN22, RORA, SEC14L1, SMPDL3B, TOB2, TP73, TSPAN9, VPS4B                 |
| isoquercitrin                             |          | -2.63              | 2.09E-05           | chemical - endogenous non-mammalian | DHCR7, FDFT1, FDPS, HMGCR, INSIG1, LDLR, SQLE                                                                                                                                                                     |
| PP1                                       |          | -2.62              | 2.77E-03           | chemical - kinase inhibitor         | ANGPT2, CXCR4, FOS, GJA1, JUN, LHB, PTGS2                                                                                                                                                                         |
| PXR ligand-PXR-Retinoic acid-RXR $\alpha$ |          | -2.62              | 1.63E-02           | complex                             | CAT, CYP2C9, GSTA2, PAPSS2, SCD, UGT1A1, UGT1A9 (includes others)                                                                                                                                                 |
| CDKN1A                                    |          | -2.61              | 8.46E-02           | kinase                              | AURKB, CDC20, CRYAB, CYR61, DUSP1, FAT2, HSPA1A/HSPA1B, ITGB5, LGALS3, MAF, MCM2, MCM7, POLD1, PRC1, RACGAP1, SOD2, TGFA, TUBB3, WNT3                                                                             |

| Upstream Regulator | Fold Chg | Activation z-score | p-value of overlap | Molecule Type           | Target genes in dataset                                                                                                                                                                                                                                                                                                                                                                                                                                                                                                                                                                                                                                                                                                                                                                                                                                                                                                                                                                                                                                                                                             |
|--------------------|----------|--------------------|--------------------|-------------------------|---------------------------------------------------------------------------------------------------------------------------------------------------------------------------------------------------------------------------------------------------------------------------------------------------------------------------------------------------------------------------------------------------------------------------------------------------------------------------------------------------------------------------------------------------------------------------------------------------------------------------------------------------------------------------------------------------------------------------------------------------------------------------------------------------------------------------------------------------------------------------------------------------------------------------------------------------------------------------------------------------------------------------------------------------------------------------------------------------------------------|
| HNF4A              |          | -2.47              | 5.69E-02           | transcription regulator | ABCC6, ACLY, ACSL1, ADCY10, ADCY7, ADPRHL1, AK2, ALS2, APOB, ASGR2, ATF7, ATP6V1D, BAAT, BCAR1, BCL6, BMP7, BTG1, C11orf68, C22orf23, C3, C8G, CALML4, CAMK2D, CCNG2, CD55, CHERP, CHI3L1, CHMP1B, CPT1B, CRY1, CYP2C9, DBP, DISP2, DNAJB9, DUSP3, EFCAB1, EHD3, ENC1, F12, FAM107B, FAM117A, FDPS, FGF13, FLNA, FURIN, FXYD7, FZD1, GABRE, GJB1, GOLIM4, GPR37, GRB14, GRIN2D, GSK3B, HIST1H2BD, HIST1H4B, HPD, HPX, HUNK, IFITM2, IGF1, ISOC1, ITIH4, JUN, JUNB, KCNJ12, KIF15, KLC4, KRT8, LDLR, LGALS3, LIPA, LRSAM1, MAL2, MGST1, MSRB2, MSX2, NDFIP1, NDRG1, NEK7, NR1D1, NR1H3, NR5A2, NUTF2, ONECUT1, OTUD7B, PAN2, PANK1, PCBD1, PCDH20, PDE11A, PDK2, PDK4, PEX6, PFN2, PIK3R3, PNKP, PPL, PPM1D, PPP1R3B, PRLR, PRR3, PTGDS, PYGL, RAB11A, RASGRP3, RASSF5, RNASE4, RNF40, RORA, RPS6, RPS6KA1, RPS6KA6, RUVBL2, SBNO2, SCD, SDC1, SEMA3C, SEMA7A, SERPINA1, SGK1, SLC19A3, SLC22A18, SLC26A1, SLC27A2, SLC38A4, SLC44A1, SOX10, SPATA2, SPP1, SSTR1, TCF7L2, TF, TM7SF2, TMEM63A, TOE1, TOX, TRPC4AP, TSNAXIP1, TTC25, UBQLN2, UCHL1, UGT1A1, UGT1A6, UGT1A9 (includes others), VTN, YPEL3, YWHAB, ZIC2 |
| ATXN1              |          | -2.45              | 3.50E-05           | transcription regulator | ATP2A2, ICMT, INPP5A, ITPR1, PRKCG, SLC1A6, TRPC3                                                                                                                                                                                                                                                                                                                                                                                                                                                                                                                                                                                                                                                                                                                                                                                                                                                                                                                                                                                                                                                                   |
| LIPE               |          | -2.45              | 9.59E-10           | enzyme                  | ACSL1, ATF3, BCL6, CA2, CDO1, CIB2, CITED2, COL1A1, COL1A2, CP, FOS, GJA1, GRB10, HSPA1A/HSPA1B, JUP, KITLG, NR4A1, PAM, PDE8A, PDK4, PER1, PVALB, RBP4, RXRG, SCD, SLC22A2, SLC2A4, ST8SIA4, THRSP                                                                                                                                                                                                                                                                                                                                                                                                                                                                                                                                                                                                                                                                                                                                                                                                                                                                                                                 |

| Upstream Regulator | Fold Chg | Activation z-score | p-value of overlap | Molecule Type                     | Target genes in dataset                                                                                                                                                                                                                                                                                                                                                |
|--------------------|----------|--------------------|--------------------|-----------------------------------|------------------------------------------------------------------------------------------------------------------------------------------------------------------------------------------------------------------------------------------------------------------------------------------------------------------------------------------------------------------------|
| AR                 | -1.38    | -2.42              | 5.80E-09           | ligand-dependent nuclear receptor | AR, ARMCX2, ATP13A4, ATP2A2, C3, CA7, CACNA1A, CAMKK2, CASQ2, CDH11, CLDN11, COL3A1, DHCR24, DISP2, EGFR, EHD3, ERBB3, ETV1, GFAP, GJA1, GPR182, IGF1, IGFBP5, ITGB4, KCNJ2, KCNJ3, KITLG, LMOD1, MCM2, MRAS, MTHFD2, NDRG1, Nrgn, PDE9A, PDYN, PENK, PER1, PLAT, PRKCD, PROS1, PTGDS, RHOB, SGK1, SMTN, SRD5A1, TF, TNFAIP2, TPD52L1, TUBB3, VCAN, VIM, WIPF1, ZBTB16 |
| CD28               |          | -2.41              | 2.04E-01           | transmembrane receptor            | BTG1, CBLB, CXCR4, DUSP14, FOS, JUN, MAF, NFATC2, NOS1, NR4A1, ORAI3, PTGER4, PTGS2, RORA, TOB1                                                                                                                                                                                                                                                                        |
| NR1I2              |          | -2.37              | 1.35E-02           | ligand-dependent nuclear receptor | CTH, CYP2C9, E2F1, ELOVL6, GSTM5, HMGCS1, IGF1, INSIG1, JUN, MGST1, MSX2, PAPSS2, SCD, Sult1d1, TF, UGT1A1, UGT1A6                                                                                                                                                                                                                                                     |
| SOCS1              |          | -2.35              | 1.00E+00           | other                             | A2M, FOS, H2-T24, IRF7, JUN, Mx1/Mx2, PTGS2                                                                                                                                                                                                                                                                                                                            |
| GATA3              |          | -2.25              | 1.21E-01           | transcription regulator           | CDKN2C, ELOVL1, ELOVL6, FOS, KIT, LOX, MAF, NR5A2, OPRM1, PPL, RET, TAL1, VIM, ZIC2                                                                                                                                                                                                                                                                                    |
| PPARGC1B           |          | -2.24              | 3.72E-05           | transcription regulator           | C3, CPT1B, DHCR24, EGLN3, FDFT1, FDPS, GGPS1, HMGCR, PDK4, SCD, SLC2A4, SQLE                                                                                                                                                                                                                                                                                           |
| BCKDK              |          | -2.24              | 1.22E-04           | kinase                            | CAT, MOG, OLIG2, PLP1, SOD2                                                                                                                                                                                                                                                                                                                                            |
| MBTPS1             |          | -2.24              | 9.99E-04           | peptidase                         | FDFT1, FDPS, HMGCR, LDLR, SCD                                                                                                                                                                                                                                                                                                                                          |
| sildenafil         |          | -2.24              | 4.95E-02           | chemical drug                     | FGF1, GFAP, PDE5A, PTGS2, VEGFB                                                                                                                                                                                                                                                                                                                                        |
| MLXIPL             |          | -2.22              | 5.85E-03           | transcription regulator           | ACLY, ELOVL6, GPD1, PYGL, SCD, THRSP                                                                                                                                                                                                                                                                                                                                   |
| TLX3               |          | -2.22              | 1.51E-04           | transcription regulator           | CCK, GALR1, GRIN3A, NPY1R, RET, TAC1                                                                                                                                                                                                                                                                                                                                   |
| NOG                | 1.45     | -2.22              | 8.56E-02           | growth factor                     | BMP7, ID3, NOG, PTGS2, SPP1, VCAN                                                                                                                                                                                                                                                                                                                                      |
| pentobarbital      |          | -2.21              | 1.47E-03           | chemical drug                     | FOS, JUN, JUNB, NR4A1, SUMO1                                                                                                                                                                                                                                                                                                                                           |
| FOSL1              |          | -2.18              | 4.25E-01           | transcription regulator           | ELN, FOS, JUN, JUNB, SERPINE2                                                                                                                                                                                                                                                                                                                                          |

| Upstream Regulator   | Fold Chg | Activation z-score | p-value of overlap | Molecule Type                   | Target genes in dataset                                                                                                                                                                                                                                                                                                        |
|----------------------|----------|--------------------|--------------------|---------------------------------|--------------------------------------------------------------------------------------------------------------------------------------------------------------------------------------------------------------------------------------------------------------------------------------------------------------------------------|
| nimodipine           |          | -2.18              | 2.09E-03           | chemical drug                   | FOS, LHB, NR4A1, NR4A2, TH                                                                                                                                                                                                                                                                                                     |
| CSHL1                |          | -2.18              | 3.18E-02           | transcription regulator         | AR, CA3, FOS, GSK3B, IGF1, ONECUT1, SRD5A1, TOX                                                                                                                                                                                                                                                                                |
| 4-phenylbutyric acid |          | -2.17              | 2.13E-04           | chemical - endogenous mammalian | ATP2A3, CNP, EHHADH, GJA1, MOG, PEX11A, PLP1, SEPP1, SERPINA1, SOD2, STK10, TIMP2, USP29, YPEL5                                                                                                                                                                                                                                |
| USF2                 |          | -2.13              | 9.06E-02           | transcription regulator         | APLN, APOA5, CHI3L1, CPT1B, SPEG, SPP1, THRSP                                                                                                                                                                                                                                                                                  |
| phenobarbital        |          | -2.09              | 1.96E-02           | chemical drug                   | CYP2C9, CYP4B1, GSTA2, GSTM5, INSIG1, PAPSS2, RAF1, Sult1a1, THRSP, TRPC3, UGT1A1                                                                                                                                                                                                                                              |
| STAT5A               |          | -2.09              | 3.23E-02           | transcription regulator         | A2M, AR, BCL6, CASP4, DUSP5, EGLN3, EPOR, FOS, GJB1, IFITM2, IGF1, MAF, NOL3, NR4A2, ONECUT1, PRLR, TNNT1, TRAF2                                                                                                                                                                                                               |
| mifepristone         |          | -2.06              | 3.36E-07           | chemical drug                   | Acan, ANXA1, ARG1, ATF3, BCAT1, BMP7, C3, CA2, Cd24a, CHI3L1, COL18A1, DUSP1, FDFT1, FOS, GJA1, HDC, ITGB4, JUN, JUNB, KIT, LDLR, LOX, NDN, NDRG1, NPY1R, NR4A1, OPRM1, PLAT, PRKG2, PTGS2, PTPN5, RELN, RHOB, ROBO1, SERPING1, SFRP2, SLC1A2, SPEG, SPP1, Sult1d1, SUMO1, VCAN                                                |
| bezafibrate          |          | -2.04              | 1.57E-04           | chemical drug                   | ACSL1, ALDH1A2, CAT, CPT1B, DLK1, EHHADH, INSIG1, LGALS3, MGLL, NR1H3, PANK1, PDK4, PEX11A, PTGS2, SCD, SLC27A2, TSPO                                                                                                                                                                                                          |
| TBX5                 |          | -2.04              | 2.15E-03           | transcription regulator         | ATP2A2, CASQ2, COL1A1, COL1A2, COL3A1, GJA1, KCNJ2, NFATC2, S100A4, SCN5A, VIM                                                                                                                                                                                                                                                 |
| testosterone         |          | -2.02              | 3.57E-08           | chemical - endogenous mammalian | A2M, ACSL1, ANXA1, AR, ATP5F1, BMP7, CA3, CAMK4, CAT, CRHR1, CYP26B1, DHCR24, EGFR, FOS, GALR1, GALR2, GDI2, HCN4, HCRTR2, HDC, HMGCR, HSPA1A/HSPA1B, ID3, IGF1, JUN, LHB, MAL, MGST1, Mx1/Mx2, NDRG1, NOS1, PDE5A, PDYN, PRLR, PTGS2, PXN, RAF1, SCNN1A, SDC1, SOD2, SRD5A1, SSTR1, SSTR3, STK11, TF, TGFA, TUBB3, UGT8, VCAN |

| Upstream Regulator                           | Fold Chg | Activation z-score | p-value of overlap | Molecule Type                     | Target genes in dataset                                                                                                                                 |
|----------------------------------------------|----------|--------------------|--------------------|-----------------------------------|---------------------------------------------------------------------------------------------------------------------------------------------------------|
| carbohydrate                                 |          | -2.00              | 3.85E-02           | chemical - endogenous mammalian   | ACLY, ELOVL6, PYGL, SCD, THRSP                                                                                                                          |
| PAX2                                         |          | -2.00              | 4.52E-02           | transcription regulator           | GRM3, GRM5, PAX6, SFRP2                                                                                                                                 |
| RASSF5                                       | -1.36    | -2.00              | 1.08E-01           | other                             | DNAJA1, FAT1, NAP1L3, RAP1A                                                                                                                             |
| Rb                                           |          | -2.00              | 4.25E-01           | group                             | AURKB, E2F1, MCM7, POLD1, SOD2                                                                                                                          |
| taurine                                      |          | -2.00              | 1.31E-01           | chemical - endogenous mammalian   | GFAP, PTGS2, SYN1, VIM                                                                                                                                  |
| miR-141-3p (and other miRNAs w/seed AACACUG) |          | -1.99              | 1.31E-01           | mature microrna                   | BCL2L11, CTBP2, TP73, VIM                                                                                                                               |
| SERPINF1                                     | -1.72    | -1.99              | 7.89E-02           | other                             | CRYAB, NEFH, OLIG1, OLIG2, SOX10, VIM                                                                                                                   |
| cannabidiol                                  |          | -1.98              | 4.52E-02           | chemical drug                     | PENK, PTGS2, TAC1, VIM                                                                                                                                  |
| CD36                                         |          | -1.98              | 1.60E-01           | transmembrane receptor            | APOB, ARG1, ATP2A2, SCD, SLC2A4                                                                                                                         |
| CYP7A1                                       |          | -1.98              | 1.41E-02           | enzyme                            | FDFT1, FDPS, HMGCR, LDLR                                                                                                                                |
| ESRRG                                        |          | -1.98              | 2.23E-01           | ligand-dependent nuclear receptor | FGF1, HADH, PDK4, VEGFB                                                                                                                                 |
| RB1                                          |          | -1.98              | 3.14E-02           | transcription regulator           | ANGPT2, AURKB, BCL2L11, CASP4, CITED2, CMAS, DLK1, E2F1, EHD3, FOS, GPS2, HUNK, IGF1, KIT, MAF, MCM2, MCM7, MET, Nefm, PGRMC1, RANBP1, TOB2, TP73, UBR7 |
| SOCS3                                        |          | -1.98              | 1.00E+00           | phosphatase                       | ATF3, FOS, JUN, Mx1/Mx2                                                                                                                                 |

| Upstream Regulator                           | Fold Chg | Activation z-score | p-value of overlap | Molecule Type                   | Target genes in dataset                                                                                                                                                                                                                                                                                                                                                                                                                      |
|----------------------------------------------|----------|--------------------|--------------------|---------------------------------|----------------------------------------------------------------------------------------------------------------------------------------------------------------------------------------------------------------------------------------------------------------------------------------------------------------------------------------------------------------------------------------------------------------------------------------------|
| DL-fructose                                  |          | -1.98              | 4.20E-03           | chemical - endogenous mammalian | ELOVL6, GPD1, SCD, SLC2A5                                                                                                                                                                                                                                                                                                                                                                                                                    |
| salicylic acid                               |          | -1.98              | 3.73E-01           | chemical drug                   | GRIN2B, KITLG, PTGS2, SLC2A4                                                                                                                                                                                                                                                                                                                                                                                                                 |
| ZFP36                                        |          | -1.97              | 6.88E-02           | transcription regulator         | E2F1, FOS, LATS2, PTGS2                                                                                                                                                                                                                                                                                                                                                                                                                      |
| miR-21-5p (and other miRNAs w/seed AGCUUAAU) |          | -1.97              | 4.63E-01           | mature microrna                 | BTG2, E2F1, NFIB, TAGLN                                                                                                                                                                                                                                                                                                                                                                                                                      |
| Growth hormone                               |          | -1.96              | 2.59E-05           | group                           | ALB, BMP7, CITED2, COL1A1, CRHR1, CX3CL1, DLK1, EGFR, FOS, GFAP, GHR, GSTM5, IGF1, IGFBP5, LDLR, NR1D1, ONECUT1, PDK4, PRLR, SCNN1A, SGK1, SPP1                                                                                                                                                                                                                                                                                              |
| S-adenosylmethionine                         |          | -1.95              | 1.68E-01           | chemical - endogenous mammalian | COL1A1, COL1A2, FOS, MAF                                                                                                                                                                                                                                                                                                                                                                                                                     |
| STUB1                                        |          | -1.95              | 1.68E-01           | enzyme                          | JUNB, MYH11, NOS1, TAGLN                                                                                                                                                                                                                                                                                                                                                                                                                     |
| PD98059                                      |          | -1.94              | 2.37E-07           | chemical - kinase inhibitor     | ACOT7, AGTR1, ANGPT2, ANXA1, AR, ATF3, BCL2L11, BCL6, C3, CA2, CCK, CD83, CDC42EP1, COL1A1, COL1A2, COL3A1, CXCR4, DUSP1, DUSP5, E2F1, EGFR, ELK1, ELN, FAH, FOS, FURIN, GJA1, GPC5, GRIN2C, GSK3B, HPCAL1, ID3, IGF1, ITGB5, JUN, JUNB, KRT8, LDLR, LHB, MET, MGLL, MYH11, NR4A1, PCSK6, PER1, PLAGL1, PLAT, PTAFR, PTGER4, PTGS2, RNASE4, RPS6, S100A4, SCNN1A, SDC1, SEPP1, SERPINA1, SPP1, SQLE, ST6GAL1, TF, TH, TIMP2, TYMP, VCAN, VIM |
| HDAC4                                        |          | -1.94              | 1.77E-04           | transcription regulator         | ATF3, CALB1, CNKSR2, DGKB, FGF13, FOS, GABRA5, GABRG3, LDB2, NETO1, NR4A1, NR4A2, NTM, Pcp411, PTGS2, SLC17A7, SYN1, TAGLN                                                                                                                                                                                                                                                                                                                   |

| Upstream Regulator | Fold Chg | Activation z-score | p-value of overlap | Molecule Type                     | Target genes in dataset                                                                                                                                                                                                                                                                                                                                                                                                    |
|--------------------|----------|--------------------|--------------------|-----------------------------------|----------------------------------------------------------------------------------------------------------------------------------------------------------------------------------------------------------------------------------------------------------------------------------------------------------------------------------------------------------------------------------------------------------------------------|
| RELA               |          | -1.92              | 4.05E-02           | transcription regulator           | A2M, AR, BCL2L11, BTG2, CFB, CHI3L1, COL1A1, COL1A2, CXCR4, CYP2C9, DUSP1, ELN, FOS, GP1BB, GSTA2, HTR1A, IER2, IGF1, JUNB, KIT, PTGDS, PTGS2, SERPINE2, SLC1A2, SLC2A4, SLC2A5, SOD2, SYTL1, TACR1, TNFAIP2, UGT1A1                                                                                                                                                                                                       |
| ciglitazone        |          | -1.92              | 1.00E+00           | chemical drug                     | CAT, GPD1, JUN, PTGS2                                                                                                                                                                                                                                                                                                                                                                                                      |
| gemfibrozil        |          | -1.91              | 1.65E-03           | chemical drug                     | BMP7, CNP, CYP2C9, EHHADH, FURIN, HCRT, LDLR, MOG, NR1H3, PLP1, RTN4, SCD                                                                                                                                                                                                                                                                                                                                                  |
| pitavastatin       |          | -1.91              | 4.72E-05           | chemical drug                     | CAT, FDFT1, FDPS, HMGCR, HMGCS1, PTGS2, SLC27A2, SQLE                                                                                                                                                                                                                                                                                                                                                                      |
| PPARG              |          | -1.85              | 5.74E-09           | ligand-dependent nuclear receptor | ACLY, ACSL1, ARL4D, ATP2A2, ATP6V1D, BCL6, C3, CA2, CAT, CDKN2C, COL1A1, COL1A2, CORIN, CPLX2, CPT1B, CYP4B1, DLK1, EGFR, EHHADH, ELOVL6, FDPS, FGF1, GATA2, GPD1, H6PD, HMGCR, HP, HR, IGF1, IGFBP5, INSIG1, JUN, KLK6, LDLR, MCM7, MGLL, MGST1, NDRG1, NR1D1, NR1H3, NR4A1, PDK4, PEX11A, PEX6, PPP2R2B, PRKG2, PTGS2, PYGL, RBP4, SCD, SDC1, SERPINA1, SLC27A3, SLC2A4, SNCG, SPP1, Tpm2, UGT1A9 (includes others), VIM |
| methotrexate       |          | -1.84              | 2.01E-03           | chemical drug                     | ALB, Apoc1, ASS1, BTG2, C1R, C3, C6, CASP4, CFB, CFH, DUSP1, DUSP14, EHHADH, FA2H, HMGCS1, IGFBP5, ITIH4, MET, NR4A2, PFN2, PTGS2, SCD, SEPP1, SERPING1, SLC27A2, SPP1, TOB1, UGT1A6                                                                                                                                                                                                                                       |
| simvastatin        |          | -1.79              | 5.14E-04           | chemical drug                     | ANGPT2, Anp32a, APOB, AR, CACNA1G, CD55, CYR61, DDAH1, E2F1, ENC1, FOS, GJA1, HMGCR, HS3ST1, KIT, LDLR, LGALS8, MAP1LC3B, NFIX, PLAT, PTGS2, RAF1, RHOB, SLC2A4, SPP1                                                                                                                                                                                                                                                      |
| NR1I3              |          | -1.79              | 7.11E-02           | ligand-dependent nuclear receptor | CYP2C9, FAM107B, GSTM5, INSIG1, PAPSS2, Sult1a1, Sult1d1, TNFAIP2, UGT1A1, UGT1A3, WISP1                                                                                                                                                                                                                                                                                                                                   |



| Upstream Regulator | Fold Chg | Activation z-score | p-value of overlap | Molecule Type                   | Target genes in dataset                                                                                                                                                                                                                                                            |
|--------------------|----------|--------------------|--------------------|---------------------------------|------------------------------------------------------------------------------------------------------------------------------------------------------------------------------------------------------------------------------------------------------------------------------------|
| sterol             |          | 1.76               | 3.22E-04           | chemical - endogenous mammalian | ACLY, ACSL1, DHCR7, FDFT1, FDPS, HMGCR, LDLR, LIPA                                                                                                                                                                                                                                 |
| MYB                |          | 1.77               | 2.55E-03           | transcription regulator         | COL1A2, CXCR4, IGF1, IGFBP5, ITPR1, JUN, KIT, KITLG, PAX6, PTGS2, SPP1, TRHR, VIM                                                                                                                                                                                                  |
| morphine           |          | 1.77               | 2.28E-05           | chemical drug                   | CALB1, CCK, EGFR, ERBB3, FOS, GFAP, GHR, GNAS, GRIN2B, JUNB, KCNAB2, KCNJ9, NR4A1, NTRK3, OPR1, OPRM1, PDYN, PENK, PLAT, PTGS2, SLC1A2, TH                                                                                                                                         |
| CREBBP             |          | 1.77               | 1.80E-05           | transcription regulator         | AR, BMP7, CAMK2D, COL1A2, CYR61, DCX, EHHADH, FDPS, FOS, GNAS, GRIN2C, GRIN2D, GRM1, HMGCS1, JUN, LDLR, NEUROD1, NR4A1, NR4A2, NR4A3, OPRM1, PRKCD, PTGS2, SERPINE2, SLC1A2, TAGLN, TH, THRSP                                                                                      |
| KNG1               |          | 1.78               | 2.25E-03           | other                           | COL1A1, COL1A2, EGFR, F12, FOS, IGF1, PTGS2                                                                                                                                                                                                                                        |
| etoposide          |          | 1.78               | 2.37E-01           | chemical drug                   | ATF3, BCL2L11, CA2, DUSP1, E2F1, IRF7, JUN, NR4A1, PIK3R3, SGK1, SOD2, TP73                                                                                                                                                                                                        |
| SRF                |          | 1.81               | 2.59E-08           | transcription regulator         | A2M, C1QL3, CALB1, CORIN, CPM, CXCR4, DUSP5, EGR4, ELK1, ETV1, FGF1, FOS, GPATCH4, IER2, IGF1, JUN, JUNB, LDLR, LMCD1, LMOD1, MGST1, MYH11, MYL9, NEUROD6, NFATC2, NR4A1, NR4A2, OPHN1, PAFAH1B1, Pcp4I1, PMFBP1, PTGS2, RAF1, RNF148, SEMA3A, SNX2, SPTBN2, T, TAGLN, TNNT1, Tpm2 |
| DMD                |          | 1.82               | 2.14E-05           | other                           | AIG1, BAALC, BTG2, CASQ1, CDH13, CLIP4, COL23A1, DCX, DGKZ, DYNLRB2, ENTPD3, GABRD, GPD1, HSPB6, MALL, MLF1, NOG, NOS1, PDK4, PVALB, SCN1B, SCN3B, SEPP1, SGCG, SPTB, WBSCR17, WFDC1                                                                                               |
| arsenic trioxide   |          | 1.82               | 1.19E-01           | chemical drug                   | CTH, DHCR24, DHCR7, FDFT1, FDPS, HMGCR, HMGCS1, MAF, PTGS2, SCD, SQLE, SUMO1                                                                                                                                                                                                       |
| REST               |          | 1.82               | 4.29E-08           | transcription regulator         | CACNA1H, CBLN1, CD59, DCX, EFNA5, EPHA10, FGF14, GLRA1, GRIK4, GRIN2B, KCNAB2, LRRTM4, NCAM2, NEFH, NEUROD1, NTRK3, OPRM1, OSBP2, PENK, SCG2, SYN1, TAC1, TNNT1, TRPM2, TUBB3                                                                                                      |

| Upstream Regulator | Fold Chg | Activation z-score | p-value of overlap | Molecule Type                   | Target genes in dataset                                                                                                                                                                                                                                                                                                                                                                                                                                                      |
|--------------------|----------|--------------------|--------------------|---------------------------------|------------------------------------------------------------------------------------------------------------------------------------------------------------------------------------------------------------------------------------------------------------------------------------------------------------------------------------------------------------------------------------------------------------------------------------------------------------------------------|
| cocaine            |          | 1.88               | 7.87E-08           | chemical drug                   | ADCY1, ASMT, DRD2, DUSP1, DUSP14, DUSP5, EGR4, FOS, GABRA6, GABRD, GRM1, GRM5, JUN, JUNB, MNS1, NAB2, NOS1, NR4A1, NR4A3, OPRM1, PDYN, PER1, PPP1R1B, PVALB, SLC1A2, SPAG4, TAC1, TH, TSPO, UBASH3B                                                                                                                                                                                                                                                                          |
| Ca2+               |          | 1.88               | 3.98E-09           | chemical - endogenous mammalian | Acan, AR, ATF3, ATP2A2, CCK, CD83, CRY1, CXCR4, CYR61, DBP, DUSP1, E2F1, EGFR, ELK1, FOS, GAD2, HDC, HMGCR, ID3, ITPR1, JUN, JUNB, KCND2, KRT1, KRT8, LHB, MAG, MCAM, MEF2D, NDRG1, NOS1, NR1D1, NR4A1, NR4A3, PER1, PER2, PTGS2, SGK1, T, TAC1, TAGLN, TIMP2                                                                                                                                                                                                                |
| cisplatin          |          | 1.89               | 1.57E-05           | chemical drug                   | A2M, AADAT, ADAMTS1, ALB, ANXA1, ASNS, ATF3, BCL2L11, BTG2, CAPN1, CAPN2, CAT, CCNG2, CDO1, CLIP4, COL1A1, CP, CPT1B, DPYSL5, DUSP1, E2F1, EPS8L2, ERBB3, FAM117A, FOS, GHR, GPC5, HEYL, HMGCR, HMGCS1, ITGA7, ITGB4, JUN, LATS2, LGALS3, LIPA, MAP1LC3B, MAPK9, MET, MLF1, NEFL, NREP, PCDH20, PDK4, PEX6, PHLDA3, PLAT, PPM1D, PRTFDC1, PTPRO, PXN, RAB11FIP1, RBP4, RGN, SLC22A2, SPP1, ST6GAL1, STK17B, TARSL2, TOB1, TP73, TYMP, UGT1A3, UGT1A6, USP3, VIM, WNT3, ZMAT3 |
| MED13              |          | 1.89               | 3.68E-04           | transcription regulator         | CIB2, ELN, ELOVL6, GPD1, PRKAR2B, PYGL, THRSP                                                                                                                                                                                                                                                                                                                                                                                                                                |
| nilvadipine        |          | 1.89               | 1.44E-03           | chemical drug                   | CD38, CRYAB, GALR2, LGALS8, PRKCD, PRKCG, Tpm2                                                                                                                                                                                                                                                                                                                                                                                                                               |
| n-3 fatty acids    |          | 1.90               | 3.26E-02           | chemical drug                   | CAT, ELOVL6, PTGS2, RGN, SCD, SDC1, SLC2A4                                                                                                                                                                                                                                                                                                                                                                                                                                   |
| NRG1               | -1.38    | 1.91               | 2.98E-06           | growth factor                   | AR, CAPN1, CDC42EP1, COL1A1, CXCR4, CYR61, DUSP1, E2F1, ERBB3, FGF1, FOS, GATA2, GPS2, GRIN2C, HMGCR, IER2, ITGB5, JUNB, MGLL, NOS1, NR4A1, NR4A3, PAFAH1B1, PRKG2, PTGS2, PXN, SLC2A4, SLC4A7, TF, TNNI3, TOB2, VEGFB, VIM                                                                                                                                                                                                                                                  |
| CPE                |          | 1.93               | 2.49E-05           | peptidase                       | CCK, HMGCR, LDLR, PAM, PCSK2, PDYN, PENK, SCG2, TAC1                                                                                                                                                                                                                                                                                                                                                                                                                         |

| Upstream Regulator | Fold Chg | Activation z-score | p-value of overlap | Molecule Type                   | Target genes in dataset                                                                 |
|--------------------|----------|--------------------|--------------------|---------------------------------|-----------------------------------------------------------------------------------------|
| entinostat         |          | 1.93               | 4.48E-01           | chemical drug                   | BCL2L11, DUSP1, EGFR, ERBB3                                                             |
| GCG                |          | 1.94               | 8.44E-02           | other                           | BTG2, FDPS, FOS, HMGCR, IGFBP4, NEUROD1, SLC2A4                                         |
| YAP1               |          | 1.94               | 1.14E-03           | transcription regulator         | AURKB, BCL2L11, CYR61, E2F1, FGF1, PPP1R3B, RASSF4, TAGLN, TP73                         |
| fluphenazine       |          | 1.94               | 2.49E-04           | chemical drug                   | FOS, NR4A1, NR4A2, NR4A3                                                                |
| raclopride         |          | 1.94               | 5.52E-04           | chemical drug                   | FOS, NR4A1, NR4A2, NR4A3                                                                |
| stearic acid       |          | 1.94               | 1.78E-02           | chemical - endogenous mammalian | ATF3, BCL2L11, NR1H3, PTGS2                                                             |
| IRF7               | 1.55     | 1.94               | 1.00E+00           | transcription regulator         | CASP4, DNAJA1, FZD1, IFITM2, IFITM3, IRF7, Mx1/Mx2                                      |
| PIN1               |          | 1.94               | 4.03E-01           | enzyme                          | COL3A1, LHB, PTGS2, TIMP4                                                               |
| Pdgf (complex)     |          | 1.94               | 4.11E-02           | complex                         | EGFR, FOS, GJA1, JUN, JUNB, LDLR, MCM7, NOV, NR4A2, PIK3R3, PTGS2                       |
| linsidomine        |          | 1.95               | 1.08E-01           | chemical drug                   | ALB, CRHR1, NR4A1, PTGS2                                                                |
| CDC42              |          | 1.95               | 4.38E-02           | enzyme                          | ATF3, BCL2L11, FOS, JUN, LHB                                                            |
| GRP                |          | 1.96               | 6.88E-02           | growth factor                   | ELK1, FOS, JUN, PTGS2                                                                   |
| mir-145            |          | 1.96               | 2.52E-01           | microrna                        | EGFR, MYH11, SOD2, TAGLN                                                                |
| LCK                |          | 1.96               | 4.95E-02           | kinase                          | ANXA1, ELK1, FOS, JUN, NOTCH2                                                           |
| ITGB3              |          | 1.97               | 7.84E-02           | transmembrane receptor          | ACLY, COL1A1, COL1A2, FOS, ITGB5, LDLR, PTGS2                                           |
| CD 437             |          | 1.98               | 1.00E+00           | chemical drug                   | AK2, ATP5G3, CLIC1, DNAJA1, E2F1, FOS, GNAS, ITGA11, JUN, MGST1, NR4A1, SH3BGRL3, SUMO1 |
| EPHB1              |          | 1.98               | 2.82E-03           | kinase                          | FOS, JUN, JUNB, PTGS2                                                                   |
| PEX5L              | -1.62    | 1.98               | 9.99E-04           | ion channel                     | DHCR7, FDFT1, FDPS, HCN1, HMGCR                                                         |
| CD24               |          | 1.98               | 2.43E-01           | other                           | ATF3, DUSP5, FOS, HOMER3, JUN, LPP, MCAM, RAF1, TIMP4                                   |

| Upstream Regulator | Fold Chg | Activation z-score | p-value of overlap | Molecule Type               | Target genes in dataset                                                                                                                                                                                       |
|--------------------|----------|--------------------|--------------------|-----------------------------|---------------------------------------------------------------------------------------------------------------------------------------------------------------------------------------------------------------|
| FOXC2              |          | 1.98               | 2.97E-01           | transcription regulator     | CXCR4, ITGB5, PTGS2, SLC2A4                                                                                                                                                                                   |
| NCR2               |          | 1.98               | 2.21E-02           | transmembrane receptor      | NR4A1, NR4A2, NR4A3, PTGS2                                                                                                                                                                                    |
| pCPT-cAMP          |          | 1.98               | 2.82E-03           | chemical - kinase inhibitor | FOS, JUN, JUNB, NR4A1                                                                                                                                                                                         |
| PTGFR              |          | 1.98               | 5.98E-03           | g-protein coupled receptor  | FOS, NR4A1, PRLR, PTGS2                                                                                                                                                                                       |
| SQSTM1             |          | 1.98               | 4.02E-02           | transcription regulator     | CITED2, EGLN3, GSTM5, JUN, MAP1LC3B, PLAT                                                                                                                                                                     |
| NFKBIA             |          | 1.99               | 2.66E-02           | transcription regulator     | A2M, AK2, AURKB, BTG2, C3, CITED4, COL1A2, COL3A1, CRYAB, CXCR4, FOS, GSTM5, HPSE, ITPR1, KRT8, MMP15, MR1, PCDH7, PLAT, PTGS2, RASA3, SDC1, SEMA3F, SLC1A2, SOD2, SORL1, SYCP2, TACR1, TGFB111, TIMP2, TRAF2 |
| GNA13              |          | 1.99               | 8.19E-03           | enzyme                      | FOS, MYH11, PTGS2, TAGLN                                                                                                                                                                                      |
| MTPN               |          | 1.99               | 8.47E-04           | transcription regulator     | ANXA1, CASQ1, COL1A1, COL1A2, CP, FBLN1, FOS, H6PD, IGF1, JUN, PLAT, SPP1, TAGLN, TH                                                                                                                          |
| KLF4               |          | 1.99               | 1.36E-02           | transcription regulator     | ALB, BMPER, COL1A1, DUSP1, DUSP5, ETV1, EVX1, ID3, IFITM3, MSX2, MYH11, PCDH18, PPL, SERPINA1, SLC4A7, SOD2, T, TAGLN, TF, VIM, WNT3, ZIC2                                                                    |
| TSC22D3            |          | 1.99               | 7.78E-02           | transcription regulator     | BCL2L11, COL1A1, DUSP1, PTGS2                                                                                                                                                                                 |
| WNT3A              |          | 1.99               | 1.04E-03           | cytokine                    | Acan, ADAMTS4, CACNA1G, CAMK4, COL1A1, CYR61, EPHA5, ERBB3, FAM101B, FZD1, GSK3B, IGFBP5, JUN, KITLG, LRRC32, MAB21L1, MRGPRF, MSX2, NCALD, NRG1, OLIG1, PTGS2, SFRP2, T, TUBB3, WIF1                         |
| BRD4               |          | 2.00               | 8.73E-02           | kinase                      | AURKB, CXCR4, CXCR5, FOS, MAL, MTHFD1L, PTPN22, TYRO3                                                                                                                                                         |
| 3-deazaneplanocin  |          | 2.00               | 4.77E-01           | chemical drug               | AKNA, CLDN11, MVP, NOTCH2                                                                                                                                                                                     |
| ALDH2              |          | 2.00               | 4.52E-02           | enzyme                      | CTH, GSTA3, MTHFD2, SLC7A3                                                                                                                                                                                    |

| Upstream Regulator                         | Fold Chg | Activation z-score | p-value of overlap | Molecule Type                       | Target genes in dataset                                                                                                                                                                  |
|--------------------------------------------|----------|--------------------|--------------------|-------------------------------------|------------------------------------------------------------------------------------------------------------------------------------------------------------------------------------------|
| CYP1A2                                     |          | 2.00               | 3.57E-01           | enzyme                              | CHRNA4, INSC, UGT1A6, Ugt1a7c                                                                                                                                                            |
| FGF19                                      |          | 2.00               | 4.36E-05           | growth factor                       | ACLY, ACSL1, AMY2A, CLIC6, FDPS, FOS, GAS2, HMGCR, MCAM, PTGDS, SCD, SCN1B, SERPINA1, SGK1, SLC2A5, SQLE, THRSP                                                                          |
| MERTK                                      |          | 2.00               | 2.09E-01           | kinase                              | EPOR, HDC, PLAGL1, SLA                                                                                                                                                                   |
| PRKAA2                                     |          | 2.00               | 4.37E-04           | kinase                              | ACOT7, ALB, CA2, CAMK4, CAMKK1, DDAH1, DLGAP2, IGFBP4, MGST1, NAP1L5, NFIB, NOS1, NPEPL1, PDYN, RAF1, SORL1                                                                              |
| IGF2                                       |          | 2.04               | 6.72E-02           | growth factor                       | GHR, IGF1, IGFBP4, IGFBP5, PTGS2, SLC2A4, SPP1                                                                                                                                           |
| E. coli B5 lipopolysaccharide              |          | 2.06               | 1.13E-02           | chemical - endogenous non-mammalian | ADAMTS1, APOA5, BCL6, CAT, Ccl9, CD83, CX3CL1, CXCR4, DUSP1, EGFR, FOS, IL11, IL16, IRAK3, JUNB, LDLR, NEDD4L, PAH, PTGS2, RHOB, SDC1, SEPHS2, SEPP1, SOD2, SUMO2, VTN                   |
| miR-1-3p (and other miRNAs w/seed GGAAUGU) |          | 2.06               | 2.38E-02           | mature microRNA                     | ADPGK, EGFR, F2, GJA1, HCN2, HCN4, HSPA1A/HSPA1B, IGF1, IP6K2, IQGAP3, ITGB4, KCNJ2, MET, MTHFD2, NOTCH2, SH3BGRL3, SLC44A1, TAC1, TSPAN4, UHMK1, UST                                    |
| TGFA                                       | -1.52    | 2.09               | 5.04E-04           | growth factor                       | ALB, E2F1, EGFR, FOS, GFAP, GJB1, IGFBP4, JUNB, PLAGL1, PLAT, PTGS2, SERPINA1, TGFA, VIM                                                                                                 |
| GNA12                                      | -1.29    | 2.14               | 2.06E-02           | enzyme                              | BAIAP2, DDR2, EGFR, FOS, GSTA3, MYH11, PTGS2, PXN, TAGLN, VIM                                                                                                                            |
| PRKAA1                                     |          | 2.14               | 2.26E-04           | kinase                              | ACOT7, ALB, ATF3, CA2, CAMKK1, DDAH1, DLGAP2, IGFBP4, MGST1, NAP1L5, NFIB, NPEPL1, PDYN, SORL1, THRSP                                                                                    |
| MAPK8                                      |          | 2.16               | 3.22E-01           | kinase                              | BCL2L11, COL1A1, DUSP1, ELK1, FOS, JUN, LHB, MVP, PTGS2, TAC1, TACR1                                                                                                                     |
| PML                                        |          | 2.17               | 3.35E-01           | transcription regulator             | CPT1B, EGFR, HMGCR, LDLR, PDK4, SCD                                                                                                                                                      |
| PTH                                        |          | 2.17               | 1.02E-06           | other                               | Acan, ADAMTS1, ATP2A2, COL1A1, COL1A2, CXCR4, DUSP1, EGFR, FOS, GJA1, IGF1, IGFBP5, IL11, JUN, MSX2, NR4A1, NR4A2, PPP1R1B, PTGS2, PXN, SFRP2, SLC2A4, SLC43A2, SLC9A3, SPP1, ST14, WIF1 |
| MKL1                                       |          | 2.17               | 2.51E-02           | transcription regulator             | FOS, MYH11, MYL9, TAGLN, Tpm2                                                                                                                                                            |

| Upstream Regulator | Fold Chg | Activation z-score | p-value of overlap | Molecule Type                   | Target genes in dataset                                                                                                                                                                                                              |
|--------------------|----------|--------------------|--------------------|---------------------------------|--------------------------------------------------------------------------------------------------------------------------------------------------------------------------------------------------------------------------------------|
| gefitinib          |          | 2.18               | 1.41E-03           | chemical drug                   | ADAMTS1, AURKB, BCL2L11, BTG2, C3, COL1A1, EGFR, GHR, GJA1, IGF1, IGFBP5, KIT, MMP15, NRP2, PPP2R2B, PRC1, PRKCG, RHOB, Sult1a1, TIMP2                                                                                               |
| IL2                |          | 2.18               | 2.48E-01           | cytokine                        | BCL6, C3, CACNG3, CCNG2, CD38, CD59, CD83, CDKN2C, CXCR4, CXCR5, DPP4, DRD5, DUSP5, ENPP2, FOS, GCNT1, GFAP, HSPA1A/HSPA1B, IP6K2, JUN, LDLR, LRRC32, MAF, NAB2, Nrgn, PIK3R3, PPP2R2B, PTGS2, RAF1, RHOB, S100A4, SPP1, STK17B, VIM |
| CREM               |          | 2.18               | 4.10E-05           | transcription regulator         | ATF3, ATP2A2, BTG2, CAMK4, COL3A1, DUSP1, DUSP14, EGR4, FOS, HMGCR, HMGCS1, JUNB, LDLR, MNS1, NAB2, NOS1, NR4A1, NR4A2, PDYN, PER1, RHOB, TAC1, TH                                                                                   |
| IL17A              |          | 2.19               | 5.75E-02           | cytokine                        | APBA3, C3, CD83, CX3CL1, CYR61, CYTH3, FOS, IL16, ITPR1, JUN, LOX, MSX2, PLXNB2, PTGS2, TIMP2, TIMP4, TYMP                                                                                                                           |
| IL1R1              |          | 2.19               | 2.54E-01           | transmembrane receptor          | FOS, GFAP, IGF1, MYH11, PTGS2                                                                                                                                                                                                        |
| JAK2               |          | 2.19               | 2.54E-01           | kinase                          | BMP7, EPOR, FOS, HTR2A, PTGS2, SLC1A3                                                                                                                                                                                                |
| colchicine         |          | 2.19               | 2.42E-01           | chemical drug                   | ATF3, CYP2C9, FOS, JUN, PTGS2                                                                                                                                                                                                        |
| PTGER2             |          | 2.20               | 7.11E-02           | g-protein coupled receptor      | CFP, CXCR4, HDC, KIF15, PRC1, PTGS2, PXN, RACGAP1, SPP1, TIMP2, TIMP4                                                                                                                                                                |
| Tgf beta           |          | 2.21               | 2.84E-03           | group                           | ASGR2, CDH11, COL1A1, COL1A2, CXCR4, CYR61, FOS, FURIN, IGF1, IGFBP5, JUN, JUNB, KRT1, LCAT, LOX, MAF, MET, NR4A2, PLAT, PTGS2, RORA, SPP1, TAGLN, TGFA, TIMP2, VIM                                                                  |
| acetaldehyde       |          | 2.22               | 1.02E-02           | chemical - endogenous mammalian | COL1A1, COL1A2, DDR2, FOS, JUN                                                                                                                                                                                                       |
| asoprisnil         |          | 2.22               | 8.43E-02           | chemical drug                   | DPP4, EGFR, IGF1, RBP4, SGK1                                                                                                                                                                                                         |

| Upstream Regulator | Fold Chg | Activation z-score | p-value of overlap | Molecule Type                       | Target genes in dataset                                                                                                                                                                                                                                   |
|--------------------|----------|--------------------|--------------------|-------------------------------------|-----------------------------------------------------------------------------------------------------------------------------------------------------------------------------------------------------------------------------------------------------------|
| ketoconazole       |          | 2.22               | 3.37E-02           | chemical drug                       | CYP2C9, GSTA2, HMGCR, TH, UGT1A1                                                                                                                                                                                                                          |
| SCARB1             |          | 2.22               | 1.81E-02           | transporter                         | APOB, CX3CL1, HMGCR, PTGS2, SPP1                                                                                                                                                                                                                          |
| GNRH1              |          | 2.23               | 1.06E-03           | other                               | CHRNA4, FOS, IGF1, IGFBP5, JUN, JUNB, LHB, NOS1, PLAT, PRKCD, PTGS2                                                                                                                                                                                       |
| STAT3              |          | 2.23               | 1.92E-02           | transcription regulator             | A2M, ARG1, BCL2L11, BCL6, CAT, CDON, CFB, CHI3L1, COL1A2, COL3A1, FOS, GFAP, GJA1, HP, HTR2A, IFITM3, IGFBP5, IL11, IRF7, JUNB, LCAT, MAF, MRAS, NDRG1, NFATC2, NR4A2, PAX6, PTGS2, RET, RORA, RPE65, SERPINE2, SGK1, SLC1A3, SLC9A3, SOD2, SP110, T, VIM |
| CYP51A1            |          | 2.24               | 9.99E-04           | enzyme                              | DHCR24, HMGCR, NSDHL, SQLE, TM7SF2                                                                                                                                                                                                                        |
| Smad2/3-Smad4      |          | 2.24               | 3.85E-03           | complex                             | COL1A1, COL1A2, IGFBP5, IRF7, ITGB5                                                                                                                                                                                                                       |
| anisomycin         |          | 2.28               | 4.67E-05           | chemical - endogenous non-mammalian | ATF3, DUSP1, FOS, GJA1, JUN, LDLR, NR4A1, PPM1D, SDC1, SLC17A6, SLC17A7, SPP1                                                                                                                                                                             |
| isoproterenol      |          | 2.29               | 1.22E-03           | chemical drug                       | APLN, ATF3, ATP1A1, BCL2L11, FOS, HS3ST2, JUN, JUNB, MEF2D, NR4A1, PLAGL1, PLP1, PTGS2, SCD, TH, TIMP2, TUBB3, TYRO3, XRCC1                                                                                                                               |
| RAF1               | 1.29     | 2.29               | 1.74E-06           | kinase                              | ACOT7, ANXA1, BCL2L11, BCL6, BTG1, CA2, CDC42EP1, CRYAB, CXCR5, DUSP5, E2F1, ELK1, FOS, HDC, HPCAL1, ID3, IER2, ITGB4, ITGB5, JUN, LHB, MET, MGLL, PCSK6, PLAT, PTGS2, RET, SCNN1A, SDC1, SQLE, TIAM1, Tpm2, YPEL5                                        |
| Pkc(s)             |          | 2.34               | 2.62E-07           | group                               | APLN, BCL2L11, CD55, CD59, COL3A1, CRHR1, CXCR4, CYR61, DBP, DUSP1, EGFR, FOS, GSTA2, HMGCR, JUN, JUNB, KCNJ2, KRT8, LHB, LIPA, NOS1, NR1D1, NR4A1, NR4A2, NR4A3, PER1, PER2, PTGS2, SLC1A2, SPP1, TAC1, TH                                               |
| SST                |          | 2.34               | 1.43E-02           | other                               | FOS, GHR, IGF1, PRLR, SSTR1, SSTR3, TOX                                                                                                                                                                                                                   |
| WNT5A              |          | 2.35               | 1.71E-06           | cytokine                            | BMP6, CAMK4, CAPN1, CCK, CD38, COL1A1, CRYAB, CXCR4, DGKZ, EGFR, ENPP2, FLNA, KIT, LCP1, NR1H3, PTGS2, RET, SDC1, SPP1, VIM                                                                                                                               |

| Upstream Regulator                           | Fold Chg | Activation z-score | p-value of overlap | Molecule Type                   | Target genes in dataset                                                                                                                                |
|----------------------------------------------|----------|--------------------|--------------------|---------------------------------|--------------------------------------------------------------------------------------------------------------------------------------------------------|
| miR-124-3p (and other miRNAs w/seed AAGGCAC) |          | 2.35               | 5.07E-01           | mature microRNA                 | AK2, CD164, CD59, DHCR24, ELOVL1, FA2H, HADH, HEBP2, JAKMIP1, LDLR, NEUROD1, PAPSS2, RASSF5, TMEM109, UHMK1                                            |
| L-glutamic acid                              |          | 2.37               | 1.54E-03           | chemical - endogenous mammalian | ACLY, CALB1, DLK1, FOS, GRM5, JUN, JUNB, MAP1B, MGLL, NOS1, PER1, PTGS2, SLC1A2, SORL1                                                                 |
| quinolinic acid                              |          | 2.38               | 6.35E-08           | chemical - endogenous mammalian | CAT, DRD2, FOS, GFAP, GFRA1, HSPA1A/HSPA1B, JUN, JUNB, NTRK3, PDYN, PENK, PTGS2, RET, TAC1, TH                                                         |
| NFATC3                                       |          | 2.38               | 3.49E-02           | transcription regulator         | ATF3, COL1A1, CXCR5, FOS, GJA1, JUN, PTGS2, TNNT3                                                                                                      |
| MAP2K5                                       |          | 2.40               | 1.02E-03           | kinase                          | FOS, JUN, NR4A1, NR4A3, PTGS2, TH                                                                                                                      |
| MAP3K1                                       |          | 2.40               | 8.06E-03           | kinase                          | ATF3, COL3A1, DUSP1, FOS, JUN, LDLR, LOXL3, NOV, PTGS2                                                                                                 |
| STAT1                                        |          | 2.41               | 1.09E-01           | transcription regulator         | A2M, ARG1, BCL2L11, BCL6, BTG1, C3, CASP4, CFB, DPP4, FOS, IFITM2, IFITM3, IGF1, IRF7, JUN, Mx1/Mx2, PCDH17, PTGS2, SERPING1, SP110, TRAF2, TYMP       |
| cephaloridine                                |          | 2.43               | 1.00E+00           | chemical drug                   | CYP2C9, E2F1, Folh1, GSTM5, HSPA1A/HSPA1B, KCNH1                                                                                                       |
| desmopressin                                 |          | 2.43               | 5.80E-03           | biologic drug                   | ALB, Anp32a, ATP1A1, FLNA, FOS, HSPA1A/HSPA1B, PPP1R1B, PXN, SLC2A4, SLC43A2, SLC9A3, SPTBN2, ST14                                                     |
| TBK1                                         |          | 2.43               | 4.06E-01           | kinase                          | ATF7, HDC, IRF7, Mx1/Mx2, PTGS2, SH3BP5                                                                                                                |
| ARHGAP21                                     |          | 2.45               | 6.04E-02           | other                           | CITED2, HDC, Mx1/Mx2, PLAT, PTGS2, SH3BP5                                                                                                              |
| SEMA7A                                       | 1.28     | 2.45               | 2.37E-03           | transmembrane receptor          | COL1A1, COL1A2, COL3A1, ELN, NOV, WISP1                                                                                                                |
| TWIST1                                       |          | 2.48               | 2.48E-05           | transcription regulator         | Acan, ADAMTS1, AKT2, AR, CBX2, CCK, CHI3L1, COL1A1, FOS, IGFBP4, IGFBP5, ITGB5, KIT, MET, PAM, PCDH18, PDZD2, SEMA5A, SPP1, TF, TLL2, VCAN, VIM, WISP1 |



| Upstream Regulator | Fold Chg | Activation z-score | p-value of overlap | Molecule Type           | Target genes in dataset                                                                                                                                                                                                                                                                                                                                                    |
|--------------------|----------|--------------------|--------------------|-------------------------|----------------------------------------------------------------------------------------------------------------------------------------------------------------------------------------------------------------------------------------------------------------------------------------------------------------------------------------------------------------------------|
| POR                |          | 2.49               | 2.48E-06           | enzyme                  | ACLY, ACSL1, Akr1c14, ALDH1A2, ASNS, CSAD, DHCR24, DHCR7, EHHADH, ELOVL1, ELOVL6, FDFT1, FDPS, FGF1, GSTA3, GSTM5, HMGCR, HMGCS1, HSD17B11, INSIG1, LDLR, MAP3K6, MSX2, NSDHL, PDK4, RPS6KA2, SCD, SQLE, TM7SF2, ZMAT4                                                                                                                                                     |
| TGM2               |          | 2.50               | 3.10E-01           | enzyme                  | Acan, BCL6, BTG2, C3, CA2, CFP, CXCR5, EHD1, FAM101B, GJA1, MSX2, RTKN2, SEMA7A, SLC27A2, SP110, SPP1, TNFAIP2                                                                                                                                                                                                                                                             |
| BCR (complex)      |          | 2.52               | 5.40E-02           | complex                 | BCL2L11, BCL6, CCNG2, CXCR4, CXCR5, FOS, IGSF1, JUNB, PTAFR, PTGS2, PTPN22, ZBTB16                                                                                                                                                                                                                                                                                         |
| methapyrilene      |          | 2.52               | 5.74E-09           | chemical drug           | A2M, ALB, Apoc1, ASS1, ATF3, BTG2, CAT, CP, CPS1, DAO, EHHADH, ENPP2, GFRA1, GJB1, GRB14, GSK3B, HMGCR, IGF1, ITIH4, LCAT, MAPK6, Mx1/Mx2, NFIB, OPLAH, Ppp1r15a, RXRG, SCD, SEPP1, SLC27A2, Sult1a1                                                                                                                                                                       |
| GNRH               |          | 2.54               | 6.82E-05           | group                   | ATF3, DUSP1, FOS, JUN, LHB, PTGS2, SCG2, SGK1                                                                                                                                                                                                                                                                                                                              |
| SMAD3              |          | 2.57               | 3.38E-05           | transcription regulator | ADORA1, ALB, APOB, BCL2L11, BMP6, CCNG2, COL1A1, COL1A2, COL3A1, CPT1B, ELN, FBLN1, FOS, HP, ID3, ITGB5, JUN, JUNB, LHB, LPAR1, MEF2D, NOV, RHOB, S100A4, SPP1, TAGLN, TF, TGFA, VIM, WISP1                                                                                                                                                                                |
| IPMK               |          | 2.58               | 3.68E-04           | kinase                  | CYR61, FLNA, FOS, JUN, JUNB, MYL9, PER1                                                                                                                                                                                                                                                                                                                                    |
| ARNTL              |          | 2.59               | 1.19E-04           | transcription regulator | CRY1, DBP, ELOVL6, HCRTR2, NR1D1, PER1, PER2, PER3, SCD                                                                                                                                                                                                                                                                                                                    |
| EGF                |          | 2.59               | 1.34E-05           | growth factor           | AR, ATF3, ATP2A2, AURKB, BTG2, CDC42EP1, CDH11, COL1A1, COL1A2, COL3A1, CXCR4, CYR61, DPP4, DUSP1, DUSP5, E2F1, EGFR, ELK1, FOS, GATA2, GFAP, GJA1, GPS2, GSK3B, HMGCS1, IER2, IGF1, IGFBP5, JUN, JUNB, NR4A1, NR4A2, NR4A3, PDK4, PER1, PLAGL1, PLAT, PTGS2, RAB5A, RHOB, RPS6KA1, S100A4, SCG2, SDC1, SERPINA1, SLC1A2, SLC2A4, SLC4A7, SPP1, TGFA, TH, TRAF2, VCAN, VIM |
| HMGA1              |          | 2.59               | 9.09E-03           | transcription regulator | DHCR7, ELK1, GHR, HMGCR, ID3, INSIG1, KIT, KITLG, PTGS2                                                                                                                                                                                                                                                                                                                    |
| TRAF2              | 1.35     | 2.62               | 9.90E-02           | enzyme                  | AURKB, EGFR, GPR34, NDRG1, PDE8A, PYGL, ST8SIA6, TRAF2                                                                                                                                                                                                                                                                                                                     |

| Upstream Regulator     | Fold Chg | Activation z-score | p-value of overlap | Molecule Type                   | Target genes in dataset                                                                                                                                                                                                               |
|------------------------|----------|--------------------|--------------------|---------------------------------|---------------------------------------------------------------------------------------------------------------------------------------------------------------------------------------------------------------------------------------|
| DOCK8                  |          | 2.65               | 1.66E-01           | other                           | CITED2, HDC, IRF7, Mx1/Mx2, PLAT, PTGS2, SH3BP5                                                                                                                                                                                       |
| Calcineurin protein(s) |          | 2.66               | 8.67E-10           | complex                         | ATP2A2, BCL2L11, CAMK2D, CBLB, CPT1B, DUSP1, DUSP14, FOS, ITPR1, KCNQ3, Lin7a, NR4A1, NR4A2, NR4A3, PTGS2, PVALB, SLC8A2, SPP1, TNNI3                                                                                                 |
| MAP2K1                 |          | 2.67               | 4.14E-05           | kinase                          | ASGR2, ATF3, BCL2L11, COL1A1, COL1A2, COL3A1, DPP4, DUSP1, DUSP5, ELK1, FOS, FURIN, HDC, ITGB4, JUN, JUP, LDLR, LGALS3, LHB, MAG, OLIG2, PTGS2, SERPINA1, SERPINE2, UBC                                                               |
| norepinephrine         |          | 2.67               | 7.17E-10           | chemical - endogenous mammalian | ADRBK2, ATP2A2, CACNA1G, Ccl9, Cd24a, CITED4, CRY1, CRY2, Dos, DUSP1, ELOVL1, ELOVL6, FOS, GPD1, GRID2, GRIN2B, GRM1, HHIP, HS3ST2, MCAM, NAP1L5, NPY1R, NR4A1, NR4A3, PER1, PLAGL1, PTGS2, RBP4, SGK1, SLC17A6, SLC2A4, THRSP, Vof16 |
| KDM5B                  |          | 2.73               | 1.86E-02           | transcription regulator         | DHCR24, DPY19L1, E2F1, EHD1, INSIG1, MCAM, MCM2, NOL3, REEP1, RNF40, SCNN1A, TMEM14A, UBR7                                                                                                                                            |
| TRH                    |          | 2.75               | 4.13E-04           | other                           | ANGPT2, DUSP1, F2, FOS, JUN, JUNB, NR4A1, PRLR, TRHR                                                                                                                                                                                  |
| IFNAR1                 |          | 2.77               | 2.47E-02           | transmembrane receptor          | ARG1, ATF3, Ccl9, HMGCR, HMGCS1, IRF7, Mx1/Mx2, PLAT, PTGS2, SDC1, SOD2, SQLE, TNFAIP2                                                                                                                                                |
| INSIG2                 |          | 2.77               | 1.44E-06           | other                           | ACLY, ELOVL6, FDFT1, FDPS, HMGCR, INSIG1, LDLR, SCD                                                                                                                                                                                   |
| SAMSN1                 |          | 2.83               | 2.47E-01           | other                           | CITED2, HDC, IRF7, Mx1/Mx2, PLAT, PTGS2, SDC1, SH3BP5                                                                                                                                                                                 |
| CLDN7                  |          | 2.90               | 1.09E-01           | other                           | ASAP1, C3, CA12, CBX2, CLIP4, CX3CL1, F5, LGALS3, NRG1, PRSS23, SLCO2A1, TIMP2                                                                                                                                                        |
| INSIG1                 | -1.41    | 2.97               | 9.74E-04           | other                           | ACLY, CXCR4, DHCR24, DHCR7, DLK1, ELOVL1, ELOVL6, FDFT1, FDPS, HMGCR, HMGCS1, LDLR, LIPA, SCD, SQLE, TM7SF2                                                                                                                           |
| glucagon               |          | 3.00               | 2.10E-03           | biologic drug                   | FOS, NR4A1, NR4A2, NR4A3, PPP1R1B, PXN, SLC2A4, SLC43A2, SLC9A3, ST14                                                                                                                                                                 |
| Jnk                    |          | 3.04               | 1.41E-03           | group                           | A2M, ALDH1A2, APLN, BCL2L11, BTG1, CD83, COL1A1, COL3A1, CXCR4, DUSP1, FOS, GJA1, IGF1, IL11, JUN, LHB, NR4A1, PLAT, PTGS2, SOD2, TRPC3, VCAN                                                                                         |

| Upstream Regulator | Fold Chg | Activation z-score | p-value of overlap | Molecule Type                       | Target genes in dataset                                                                                                                                                                                    |
|--------------------|----------|--------------------|--------------------|-------------------------------------|------------------------------------------------------------------------------------------------------------------------------------------------------------------------------------------------------------|
| cholic acid        |          | 3.06               | 1.11E-03           | chemical - endogenous mammalian     | DHCR7, EHHADH, FDFT1, HMGCR, IGFBP5, KRT8, LCAT, MGST1, MVP, NR1H3, PLTP, SQLE, TAGLN                                                                                                                      |
| nitrofurantoin     |          | 3.08               | 3.77E-07           | chemical drug                       | A2M, ADAMTS1, ALB, Apoc1, ASNS, ASS1, BTG2, C3, CAPN2, CAT, CP, CPS1, EHHADH, GJB1, HMGCR, HMGCS1, HPX, IGF1, ITGB4, ITIH4, LCAT, LGALS3, LOX, MET, PLAT, SDC1, SEPP1, SERPINA1, SLC27A2, SPP1             |
| potassium chloride |          | 3.15               | 1.31E-12           | chemical drug                       | AMIGO2, ATF3, ATP1A1, ATP2B3, ATP2B4, BCL2L11, BTG2, CALB1, E2F1, FOS, GABRD, ID3, IGFBP5, JUN, LHB, NOS1, NPAS4, NPTX1, NR4A1, NR4A2, NR4A3, PDYN, PTGS2, SLC8A2, SPP1, TH, TP73                          |
| cholesterol        |          | 3.33               | 1.52E-05           | chemical - endogenous mammalian     | ABCA7, ACLY, ACSL1, ADAM11, APOB, ATF3, COL1A1, COL3A1, DHCR7, FDFT1, FDPS, HMGCR, HMGCS1, LDLR, LGALS3, MAP1LC3B, Meis1, MYH11, NR1H3, NR4A1, NR4A2, NR4A3, NSDHL, PLTP, SCD, SLC2A4, SQLE, TCTE1, TM7SF2 |
| bicuculline        |          | 3.46               | 2.22E-07           | chemical - endogenous non-mammalian | ATF3, BTG2, CYR61, DUSP1, EGR4, FOS, IER2, JUN, JUNB, NPAS4, NR4A1, NR4A2, PTGS2                                                                                                                           |
| dalfampridine      |          | 3.61               | 4.28E-08           | chemical drug                       | ATF3, BTG2, CYR61, DUSP1, EGR4, FOS, IER2, JUN, JUNB, NPAS4, NR4A1, NR4A2, PTGS2                                                                                                                           |
| F2                 | -3.92    | 3.84               | 3.49E-05           | peptidase                           | ANGPT2, CD55, CDC42EP1, CLIC1, COL1A1, CXCR4, CYR61, DUSP1, FOS, GABRD, IER2, IGF1, IGFBP4, IGFBP5, JUN, JUNB, MGLL, MYH11, NR4A3, PLAT, PROS1, PTGS2, RHOB, SMTN, TAGLN3, TRPC3                           |
